# Supplementary material for: Overexpression of Ssd1 and calorie restriction extend yeast replicative lifespan by preventing deleterious age-dependent iron uptake
Source: eLife. 2026 Jan 12;14:RP108892. doi: 10.7554/eLife.108892 (PMC12795504; doi:10.7554/eLife.108892)
Supplement: Figure 1—source data 1. [file elife-108892-fig1-data1.xlsx]

## Sheet: 1A
ssd1∆	ssd1∆	ssd1∆	SSD1	SSD1	SSD1	pGPD-SSD1	pGPD-SSD1	pGPD-SSD1
FSC-A	SSC-A	Alexa Fluor 488-A	FSC-A	SSC-A	Alexa Fluor 488-A	FSC-A	SSC-A	Alexa Fluor 488-A						Mean (Alexa Fluor 488-A)	Median (Alexa Fluor 488-A)
1.06497e+06	52419.2	188.128	293482	23502	295.316	582545	46934.8	9821.02					ssd1∆	161	139
1.08492e+06	56505.6	139.698	284158	27071.2	290.285	854424	38696.4	11645.8					pGPD1-SSD1	10633	8997
936415	63663	152.627	716446	44801.3	451.744	602276	37845.3	7434.96					SSD1	598	501
1.02285e+06	41115.9	101.061	761012	42095	597.918	3.91842e+06	76980.4	16816.8
280242	23153.6	16.5878	714754	41646.6	378.549	213352	18436.3	3053.31
848957	49428.4	109.633	700707	47703.3	464.771	556684	39228.1	11440
312497	28855.1	76.377	703486	44037.2	611.729	279970	24011.4	4292.2
367891	30734.3	104.462	382575	28130.1	408.762	891695	47532.3	10156.2
686554	33535.1	158.349	1255610	51252.3	819.031	843024	50959.8	9150.54
1.44499e+06	81367.7	292.729	971166	50293	585.174	1.09491e+06	48738.7	9138.53
1.12218e+06	102076	301.779	724793	40683.9	524.923	273669	19226.2	5706.67
1.20635e+06	65270.9	131.973	1.29356e+06	58769.8	636.805	895413	41619.6	9184.07
1.00998e+06	57928.4	227.727	872881	46908.6	407.562	795957	35502.5	9834.86
561178	33090	136.094	1.03258e+06	43794.6	427.581	329184	31036.8	5845.47
968244	85208.3	308.45	1196675	60274.8	565.111	382924	38476.7	5860.29
379667	34765.1	11.3268	5.32419e+06	115029	1342.46	370879	30122.5	6169.73
554872	52882	124.387	3.19568e+06	106708	1296	361129	31003.3	6393.75
368228	33927	60.1345	827427	50702.7	633.2	368829	31748.7	6545.82
755082	39546.3	124.092	234274	19025.1	94.3296	4971685	103425	22693.2
255457	23996.2	35.0561	1033879	55518.5	494.642	675618	37298.3	9660.27
1.26268e+06	88391.8	314.9	398642	39668.1	358.09	1.1782e+06	75539.1	21166.2
378198	33069.7	157.469	825157	46090.2	452.165	4.18368e+06	91860.8	20056.9
517218	32679	87.369	1.15256e+06	53200.2	715.555	872929	71465	19089
981354	49232.9	183.234	1.12059e+06	54306.7	668.542	939893	61055.3	15051.4
277306	28290.3	94.3296	651221	39746.4	398.589	674334	39759.9	6826.24
380003	32762.2	133.298	263959	27448.8	142.565	1.4867e+06	60698	18168.5
848785	44565.7	147.12	891873	44251.7	564.01	302694	27806.6	4541.06
924009	44621.1	128.734	999692	47779.2	640.883	371654	32426.7	11035.7
206647	17715.4	81.522	849272	36577.6	496.521	837825	34903.7	12037.7
986976	65118.4	252.865	720440	34593.6	337.852	1.26118e+06	64187.1	15313.6
708233	36448.2	109.559	1.06126e+06	40415.1	679.015	1.49584e+06	60671.8	14067.2
46970	86600.1	224.533	313322	32114.7	230.339	228038	21958	4430.79
1.19893e+06	54247.9	166.63	1.97138e+06	116798	1777.57	1.1079e+06	65147.5	15865.2
366896	27755.1	85.6649	362133	33870	331.925	354174	30991.4	10239.3
689889	40547.7	138.521	958960	76312.8	783.103	372295	30938.1	7841.75
358806	32420.9	110.519	200833	10409.4	137.271	1.10623e+06	65815.3	15754
361546	32126.5	119.006	2.78836e+06	90775.4	1136.87	821828	44245	9692.96
828168	46845.6	115.022	1.05997e+06	48851.9	761.32	654081	45308.2	9595.39
379215	33136.9	111.11	772760	46048.9	592.988	707176	42046.4	11336
514476	29828.2	80.7855	242800	24649.1	201.475	383928	32136.1	6765.39
818112	45439.4	134.255	250799	27437.5	305.08	332201	36164.8	8092.38
325453	25816.4	88.9987	986225	44684.5	542.564	263156	25570.2	4523.84
359563	31413.1	40.5369	811169	31171.1	440.728	575069	38698.4	7737.69
1.2898e+06	67547	210.94	1.19836e+06	48440.3	775.807	2402548	66673.9	15249.9
880609	42367.6	175.925	977245	59300.3	820.866	218106	18648.8	3152.5
1.2017e+06	59657.5	194.622	185151	14080.3	100.47	2.19894e+06	54983.7	15802
1.15248e+06	47847.9	219.448	2.89881e+06	102277	1065.28	1.73349e+06	86163.4	27565.8
1.63594e+06	70586.6	183.819	1.17535e+06	62630.5	690.884	237492	20302.7	3190.7
1.15677e+06	47725.7	223.444	1.13455e+06	65348	994.189	869863	44990.9	9418.67
695064	44564.3	149.837	392914	36552.1	414.83	895737	43783.8	9546.53
682194	32590.8	136.241	1.0614e+06	51702.3	437.356	331860	29422.2	6381.75
345137	30481.1	44.1563	613367	55152	626.051	960958	51636.8	17238.1
1.11813e+06	54320.1	65.6806	320203	32991.8	368.186	933498	44581.9	9334.94
1.20059e+06	51347.9	205.335	1.93463e+06	87464.4	1148.31	325328	29214.4	6080.5
1.01368e+06	54443.5	178.265	1.22829e+06	63563	828.138	196727	22535.7	3911.31
1.09647e+06	66286.6	136.094	292264	25981.7	255.178	317172	29956.3	7306.39
881456	47752.6	169.046	1.5573e+06	82215.2	1305.68	339875	28891.8	5852.88
264451	19771.6	131.679	316165	28401.1	505.216	1.14002e+06	56329.6	10616.5
382285	24914.7	178.411	338965	31934	375.428	385878	39628.3	8810.32
639964	31827.7	142.638	2872178	127436	1403.03	673972	62814.7	10530.6
711236	77427.8	431.099	1.00371e+06	43189.2	502.157	236745	23596	3519.41
811388	48277.3	151.452	947206	60604.3	575.907	573947	36824.1	7539.02
263387	19020.7	192.944	1.11103e+06	56933.6	639.32	861541	65639.3	14201.6
1.11059e+06	50160.3	244.689	1.18455e+06	65157.2	982.046	361856	33689.5	7227.82
701545	42477.8	56.5342	735921	52362.4	711.126	370160	36508.5	7944.12
1.08607e+06	59074.7	181.627	1.24509e+06	67525.7	727.817	348375	37700	8100.22
331367	20823.5	181.846	385682	27255.5	393.143	982698	67647.7	15735
316398	25301	11.5549	2644771	68952.6	628.98	936974	43123.4	8262.25
1.34375e+06	65986.9	179.434	387210	35864.8	368.683	368674	44442.7	9655.54
339983	33375.2	61.3375	846576	63204.8	688.593	272998	23409.9	4959.3
329769	28154.9	87.2689	1.33038e+06	70832.1	991.295	924736	48814.9	7385.18
858007	40094.2	143.594	378368	38641.3	530.532	583093	32550.3	7306.04
963941	41610	126.156	1.17785e+06	101297	1238.82	1.22603e+06	68669.8	15022.1
773692	48446.6	95.8837	985498	62265.5	782.904	1.34766e+06	65898.8	11977.1
1.02115e+06	44739.1	203.15	1.07023e+06	49089.2	607.151	317675	29635.5	5419.11
2579206	105009	329.352	947090	60831.7	568.62	645748	37439.1	9511.73
1.20161e+06	74560.2	132.93	296012	30039.4	266.805	390943	38174.7	7519.18
290779	28668.5	84.6378	902414	45928.2	412.714	851073	66040.6	15749.7
358584	37218.1	110.741	907602	70770.7	1032.24	361466	38192.5	7301.1
1.22538e+06	47877.5	75.7255	847478	39767.3	419.553	223622	22404.9	3393.74
662158	34306.7	81.7677	1.01784e+06	55119.2	651.271	232054	19832.6	3155.33
773712	52288	165.311	2.22826e+06	98581.1	1586.81	377712	37078	6592.7
326629	26054.9	52.9473	548530	42069	523.191	357682	33206	6271.47
739954	50365.3	144.843	326820	37659.4	365.912	1.20246e+06	43295.3	13028.1
1.12927e+06	62204.2	256.334	1.09416e+06	61722.1	757.725	1.19673e+06	61905	20898.3
1.14618e+06	49930.6	158.862	247462	18806.4	345.056	900044	50439.3	12459.3
290466	27394.2	102.392	1.2132e+06	64962.7	1352.63	375819	32574.1	5594.56
676511	37232.5	208.248	843545	45708.9	464.771	302507	30811.8	6244.99
747370	46865.4	106.531	1.03162e+06	52802.9	580.096	347462	30739	7422.67
929174	41532.1	85.9525	948021	60658.3	781.247	289477	27389.6	4276.74
1.10157e+06	56069.2	231.863	775592	48622.9	352.253	337144	32690.3	5718.74
339564	26028.8	151.746	900525	85029.2	1123.18	377406	37573.2	8057.44
263898	22340.8	115.243	256735	22278.9	156.588	632644	38350.3	7970.67
1.20298e+06	50342.6	160.181	325628	30360.3	349.618	1.05291e+06	59484.6	15118.9
270636	27418.7	-11.5078	719722	42250.7	542.979	275313	26445.1	4305.4
958703	56163.5	154.388	372422	42824.4	497.565	557648	37411.6	6529.94
925500	47764.3	140.507	833000	42578.7	473.719	913923	47604.5	8064.21
844752	44445	233.603	7020363	117008	1148.73	1.19571e+06	68606.5	15747.8
286812	23672.9	74.8304	359504	32094.6	384.15	831935	42170	12981.2
1.19414e+06	56756.7	195.279	340811	31426	235.271	336763	29377.2	6088.76
664804	40462.5	116.055	277603	25481.1	200.673	698358	39003.2	12040.9
231471	19697.5	49.2943	314530	26804.8	195.643	1059886	85296.6	27218.1
1.38774e+06	60960.9	141.903	336356	27243	314.613	233239	20902.4	4000.48
967058	62703.4	259.297	1.17783e+06	64518.5	783.699	861402	39123.5	9431.81
274537	22928.3	92.0349	1.10796e+06	54224.9	867.392	1.27839e+06	80260.9	21259.9
364741	27117.7	100.914	313939	27558.5	264.929	328345	29327.6	5535.32
1.10662e+06	64453.8	221.192	394109	44821.2	352.182	1.72921e+06	72665.1	16027.7
1.09585e+06	48434	174.388	596832	36510.3	330.21	4271038	93926.2	21798
273191	24591.8	83.2428	888447	45833.1	472.881	934127	52118.4	12758.7
1.73228e+06	92373.5	272.286	912316	52590.1	457.841	231586	22544.1	3570.74
774502	39326.5	70.6096	223468	20999.8	236.938	404775	41042	7345.15
1.20788e+06	75998.2	240.923	716762	45483.3	437.356	573111	47582.7	10488.4
619494	39363.1	42.6596	374848	30089.7	500.835	199436	19520.8	3187.94
748844	43844.1	98.8429	1.09461e+06	64346.4	780.517	939890	46711.2	8196.73
1.01157e+06	54017	161.794	229211	18915.6	214.65	879617	47664.4	11332.3
893783	47321.2	85.5415	266700	25426.2	290.932	277050	25274.9	6639.93
995700	46855.6	177.753	914464	46090.2	549.813	6.33234e+06	131323	33741.1
356150	40076.6	195.935	289098	26609.3	236.358	3.87701e+06	89204.4	19341.9
345363	30530.9	143.006	340259	27611.6	239.04	1.16854e+06	51851.8	14246.4
361103	34890.5	257.418	348795	32766.6	258.141	734475	36266.1	6812.05
1243936	54399.6	204.17	233998	12641.1	276.539	273620	22507.3	3816.21
1.04552e+06	53500.6	212.759	377024	39686.1	456.51	272316	29624	4879.73
352328	31419.5	42.0302	1.43755e+06	62109.9	724.804	702932	37638	7004.65
329237	31562.7	104.388	915742	82372.3	1174.93	298641	24432	4386.45
754079	37882.8	60.6957	3.40443e+06	151433	2027.14	374070	33211.2	6714.77
262373	21532.6	29.3749	282251	23057.2	173.437	1.06085e+06	55046.8	11372.2
350848	34038.5	60.8561	1177907	53934.9	619.031	299189	26034	5654.21
598199	43603.7	188.566	335926	33397.2	445.783	1.40571e+06	62572	14062
1.00423e+06	47221.8	206.792	944465	37485.3	446.133	3.55771e+06	123912	31920.1
287729	28802.7	90.8502	976160	54716.9	553.055	1.07574e+06	58901.9	17903.8
540616	40388.8	107.27	222750	16798.9	60.375	275483	21073.7	4909.74
1218517	57204.5	206.573	297480	27222.4	202.276	364783	26921.7	6822.64
1396940	82032.3	293.304	347515	30766.6	497.705	689748	49220.5	16346.2
936047	64718.6	194.039	219068	19203.9	121.586	665591	40657.3	15472.3
355783	44307.5	112.291	1.14368e+06	101453	1499.33	1.34998e+06	76776.3	15737.8
699946	39036.5	146.753	12331926	143592	1800.72	572808	28961.6	10193.7
289922	26674.4	96.7716	1.77014e+06	95404.8	1505.4	549188	55562.2	10910.1
1.02496e+06	41990.9	93.6635	286512	24570.3	100.914	251284	18884.4	5127.54
1.75351e+06	64427.3	219.739	734482	42151.7	382.661	245001	23133.3	4402.97
346121	33591.8	107.122	882938	49260	612.889	538684	36619.5	6317.15
739391	38383.7	136.903	311008	27314.1	182.942	306814	30681.7	5512.73
778362	37250.3	91.5166	321828	26498.2	303.716	238503	21013	4650.7
717070	39456.9	130.574	351136	34463.3	371.027	262238	24425	4014.25
939695	55045.4	248.887	2.2673e+06	106691	1565.98	763183	44081	9926.29
1.32468e+06	57843	128.955	1.13046e+06	68368.3	720.249	752103	40721.1	8630.99
1.08457e+06	54573.6	224.388	1.01972e+06	47340.6	791.779	601973	38306.1	5662.19
754509	47984	135.873	938987	51905.1	585.174	692948	36053.2	7604.82
728579	41841.4	124.313	1.87462e+06	96367.5	1815.41	885214	50800.5	10318.1
991377	59064.8	258.719	324888	30415.5	334.71	881886	50388.3	15839.8
386665	33590.1	63.8285	1.25915e+06	75097.1	684.548	1.1233e+06	49273.5	12613.5
826693	39015.1	156.808	277213	24200.5	216.177	923272	59850.9	9646.15
625323	37359.9	117.678	313329	26070.9	199.289	1.52078e+06	75298	15948.1
1.43127e+06	64054.4	183.454	747921	38139.8	585.037	250740	21595.8	3094.47
1.12383e+06	45841.8	203.66	369963	37466.4	293.089	270335	25339.4	4957.6
1208048	50900.3	159.522	892481	48616.4	538.971	978623	50005.4	17296.9
1.23983e+06	93268.7	315.903	1.48293e+06	64157.4	564.423	897222	68110.6	15934.3
652673	32770.2	89.6653	946236	93833.6	1165.54	259011	25119	4023.14
942472	69567.1	144.476	360195	30553.9	387.904	711470	34726.8	8560.11
766379	39342.2	164.945	719124	42820	451.604	959587	59253.3	8793.58
301593	24794.5	60.2147	346174	28722.4	335.567	288677	23680.1	5588.84
1.26972e+06	65200.4	217.558	1.07286e+06	51359.9	616.711	276104	26693.2	4782.02
1.00291e+06	54786.8	138.889	1.17682e+06	62636.6	869.863	298274	30704.2	4642.37
778555	69528.6	200.455	292915	24279.9	221.192	849437	43488.1	12057.3
1.09666e+06	61559.9	125.861	2.03573e+06	136333	2222.91	819396	59894.8	10920.7
2100654	148194	1321.56	385164	34670.1	493.946	305732	28383.1	5035.83
909018	58198.5	123.503	290982	24086.8	397.104	734471	44575.9	9547.03
944697	58474.1	183.527	206082	16478.5	138.301	336528	30375.5	5052.84
540388	28202.4	115.612	271701	26503.6	254.455	823307	48103.4	8007.1
353790	34175.1	72.5555	1.53023e+06	75225.2	1032.74	677915	37760.7	7753.43
379505	32300.7	77.1105	942891	56101.5	577.761	767796	49704.2	8598.37
1.20891e+06	58361.9	135.432	1.26254e+06	53916.4	592.988	1.15762e+06	59074.6	15134
2699236	84643.6	165.165	2.89426e+06	102830	1250.96	1.69787e+06	53379.2	10078.3
1.04757e+06	47819.2	266.156	1.02979e+06	49630.4	517.506	334168	29368.5	7841.47
775046	49108.8	182.285	325050	31811.8	392.506	958518	49762.6	10420.1
1.1475e+06	53917.9	200.6	373350	37163.5	469.456	341999	39602.3	9468.59
1065277	46871.9	107.713	3341698	76018.2	823.478	382293	35137	7760.99
280827	25228.2	9.5044	294240	28898.7	200.6	718049	40380.1	8993.03
972772	48008.2	172.12	563671	32942.7	501.948	999893	62252.3	13952.1
1.06859e+06	50934.8	160.988	399333	35574	407.915	789141	37792.7	8762.8
887140	41000.3	172.852	654602	35596	403.254	1.02462e+06	77777.8	24715.3
622128	37369.5	106.9	289586	27801	323.06	323755	28705.2	5373.93
2.98604e+06	167553	620.463	837265	51927.3	487.188	381329	32002.9	7043.76
604053	33456.4	61.3375	754692	38292.3	522.29	199117	18081.6	2831.7
1.45554e+06	128418	546.293	1.38135e+06	98465.9	1612.08	682624	39970.2	8588.84
1.19511e+06	55816.7	189.442	348367	33188.5	354.389	1.95581e+06	74856.9	15639
355996	34871.6	92.4791	1.00424e+06	51962.5	615.415	3.30313e+06	77818.1	18453.6
938650	53778	151.819	1.14864e+06	61344.6	799.898	899664	43926.4	12112.2
282363	22333.7	91.5907	398140	33472.2	284.099	283024	23768.8	4993.54
357965	40896.6	149.176	1.40575e+06	97107.1	1238.18	797478	32727	8477.44
605790	29803.5	119.301	1.4918e+06	68371.6	810.841	750594	46688.7	10904
1.09549e+06	51609.5	75.0745	1.03045e+06	51564.3	541.528	1.29107e+06	66304.4	18585.3
1232361	81975.7	237.591	4954366	127005	2083.83	918539	50080.7	10112.1
1.04374e+06	59617.5	188.639	1.36223e+06	108555	1461.49	1.08176e+06	46952.3	10274.6
662577	34917.8	133.74	1.07207e+06	49724.5	552.71	981370	59767.9	12777.1
1.18599e+06	70073.6	152.7	679380	41958.6	405.797	504043	40021.4	10799
283716	22912.9	67.7785	4499416	125987	1562.73	633980	35921.8	6072.24
1.07369e+06	38069.8	219.957	1.10538e+06	48047.1	447.256	978361	44886.5	9814.25
651784	42771.1	147.487	1.81767e+06	99231	1083.07	362491	32186.7	6741.1
990320	48950.7	147.341	575627	38291.7	372.944	360344	34222.2	6778.8
749728	42136.4	64.7138	568372	28844.9	397.529	698527	35691.6	6929.88
212665	17982	67.294	1.01465e+06	46305.8	615.483	395755	35475.1	7155.31
757844	45394.4	177.533	674546	41417.8	455.739	789171	39217.9	8817.94
579588	34275.4	142.859	507233	47122.2	534.546	715880	39358.9	10814
287445	26542	58.0527	1.28068e+06	56395.9	669.556	1.40112e+06	72663.4	19232.4
1.03932e+06	45832.6	146.092	951700	57170.9	679.69	316994	41151.5	7631.44
1.29454e+06	67725.8	240.127	2.06235e+06	160821	2686.89	742032	38330.1	9085.66
587507	34749	138.227	783519	39771.5	588.534	338463	27152.5	5712.6
1.6009e+06	80576.8	187.398	267142	16240.8	260.669	329618	31634.6	6393.04
343764	30350.8	145.357	869153	52039.1	612.138	971618	53862.6	7923.65
291285	21763.4	96.4016	1.01276e+06	48545.8	646.181	864373	43657.2	8278.13
858665	47558.1	136.462	381162	31853.5	420.117	1.29895e+06	67435.4	25125.1
941664	50750.6	157.615	280281	28880	251.057	609200	34118.5	6745.12
340394	34790.4	87.5913	702237	39221.6	507.439	2953508	81935.9	21545.1
1.23335e+06	58740.4	246.499	3.33047e+06	99071.5	1152.54	619546	36137.4	10855.2
567656	38102.2	84.2568	313844	34858	85.0485	2.25166e+06	97566.5	16549.8
328743	28609.9	15.4414	360972	25515.6	349.831	1.55964e+06	90824.4	23278
906430	43719.8	205.627	247795	28183.3	132.783	2.36294e+06	96139.4	21497.7
533591	39052.5	98.9908	650794	39575	425.047	355687	39680.1	7603.76
1.02218e+06	76654.6	290.142	700593	38932	356.809	275425	26239.2	4201.41
878691	46020.1	136.094	1.48454e+06	87267.5	1098.11	365449	34720.6	8558.34
310606	32336.7	86.8504	238826	24864.2	123.871	313936	27266.2	5668.47
1.26058e+06	98872.3	349.119	1.71674e+06	106749	2099.43	2849957	75209.4	21444.2
243016	21908.2	-2.4004	617852	35116.7	448.589	886864	39854	10458.3
693319	41937.2	95.1437	2.17435e+06	90716.6	1181.91	294244	24325.7	6188.58
247705	22794.5	79.8042	330040	30056.7	210.358	393617	37686	7193.29
273097	21681	69.638	1.47088e+06	99761.2	1156.36	956619	61066.2	13505.3
942397	72700.4	320.771	555787	38834.7	532.124	1372495	75332.6	15179.4
743879	36013.6	114.063	816663	38347.7	478.957	800200	36022.2	9431.88
1.54698e+06	99543.1	211.086	1.08376e+06	60910	607.767	325212	32332.8	5992.17
352042	31329.1	85.4426	717159	50811.2	499.096	643563	35948.6	7561.68
916708	48168.4	142.271	349546	35874.9	371.666	373469	36040.4	10285
1.08879e+06	46759.7	285.107	877024	41651	601.34	283030	26128	5197.15
1.30424e+06	70974.7	254.166	894611	58659.4	790.124	718346	46548.4	11329.9
317187	31412.9	116.055	15901348	218872	2203.21	308248	29336.6	5310.88
1.13211e+06	52789.2	289.063	984779	55494.3	524.715	277918	28281.5	4961.27
375317	37352.7	111.774	1.01405e+06	54667	704.543	889793	47279.7	9590.66
344286	29942.3	49.2943	959437	48668.1	460.222	1.09261e+06	71725.7	24784.8
270752	22336.4	58.0527	286340	24468.3	326.279	336606	31317.8	5249.04
711659	63968.2	147.561	4.80014e+06	137184	2010.19	573765	54638.5	8587.43
797383	48287.2	84.4791	144117	16096.7	202.641	855306	44277.2	8595.41
1.04097e+06	51573.6	148.148	1.03995e+06	48033.7	642.786	4.02545e+06	133809	32042.9
316510	28444.9	-4.0948	354046	37377	342.703	878936	49417.7	8164.18
291279	26098.3	106.014	321346	31707.4	250.984	864547	43493.2	8855.5
1.70107e+06	79444.6	332.068	608947	37515.5	395.124	639052	34061.4	6999.85
954966	46205.2	226.566	273495	27462.9	267.743	292310	26783	4068.68
987503	47277.2	157.175	294044	23515.4	300.128	365090	64329	22641.6
348069	26253.8	56.135	289967	29594	309.454	298555	27803.2	5053.27
256744	21554.7	50.9602	262973	22736.2	120.554	968392	60733.6	11977.1
1.01251e+06	42953.6	143.667	363572	37985.1	393.214	309559	30048.6	6560.29
339029	35222.7	80.5401	1.14748e+06	59435.5	705.619	400638	36650.1	8153.66
369886	30667	128.439	354048	54505.2	562.22	890536	38451.2	10071.8
1.06044e+06	48311.8	162.454	2366975	100482	1284.21	1.10278e+06	53132.5	13464.4
819615	44154.7	186.01	257897	24843	208.903	277293	23820.9	5849.56
593645	34333.2	60.6155	784499	37130.8	413.208	583051	36683	8576.06
789777	44786.7	131.605	938910	50323.5	440.096	259489	21411.8	4409.89
358110	29646.1	31.472	768243	43122.8	332.782	384690	34236.6	7214.97
1.09757e+06	46357.5	266.3	261095	24238	229.904	1.16932e+06	61791.9	16857.9
1.11223e+06	65471.7	185.28	344889	32780.4	468.198	1.09356e+06	43751.8	16059.6
281926	25737.7	43.6834	280715	29480	341.277	936579	55888	16837.2
1.21403e+06	65544.3	278.844	263550	21488.2	286.761	1.03412e+06	57504.2	11507.9
880618	42824.6	195.06	304089	29450	402.194	984863	49535.9	16546.8
1.11624e+06	66097.4	181.115	370776	32331.9	382.661	813598	43489.1	10203.7
346750	30421.4	142.565	970501	41073.1	530.878	840984	47411.2	9314.19
810070	38341.8	132.636	355548	25950.2	405.373	2.0148e+06	60815.2	15911.3
240972	19550.4	45.0238	282839	33365.6	268.969	1513247	81749.3	21165.2
189074	16739.3	103.944	337450	34269.7	363.922	279097	26816.1	4549.25
822363	38425.8	59.6537	1.03978e+06	52735.8	512.232	339364	27250.8	9443.24
340537	27080.3	23.1895	1.05176e+06	59032	605.443	229034	20261.1	5156.34
789688	50813.5	114.727	744106	38821.7	337.994	1.23023e+06	54767.7	13338.7
315101	27799	101.357	1.15292e+06	61944.3	688.525	351714	32449.3	5214.73
998636	52470.6	119.669	305697	40112.7	318.122	1.09414e+06	53434.1	10704.5
920738	41544.4	159.155	345323	31612	391.869	799905	50104.4	9749.15
1.47178e+06	58894.5	200.746	376124	37740.3	422.794	392073	33006.1	6708.77
1.00609e+06	50557.9	200.017	308530	30863.2	277.763	243966	19437.7	3117.13
658254	34808.2	169.851	1.53319e+06	86279.4	1041.07	355357	34607.3	5603.31
737602	42930.6	104.536	893324	58772.5	613.777	1.5237e+06	98086.7	23761.4
616547	37794	65.2777	290953	29848.3	274.665	913722	49237.8	9691.4
985892	48057.2	96.1797	1.1773e+06	61889.4	994.754	300886	29241.2	5190.86
910982	43726.6	124.019	903611	46217.6	572.608	329557	29518.4	7362.59
276136	29799.4	87.2689	287895	23643.5	386.134	1.96822e+06	67479.5	17604.2
1.42578e+06	85223	228.235	342732	33665.7	410.809	892171	40841.3	9152.23
390368	33369.5	79.559	1.89268e+06	136648	1874.57	622469	32446.3	8673.7
316749	26160	92.1089	1.01631e+06	70940.4	940.11	355211	30521.6	7040.37
1.28054e+06	65681.4	216.541	4.98199e+06	119016	1669.05	598331	31578.2	8755.25
258170	25126.6	41.7156	1.52751e+06	120703	1317.75	361521	32699.2	6577.1
387082	52722.9	181.846	284179	23935.7	394.629	333852	31766.9	6652.78
4.12611e+06	234217	1128.33	1307040	73403.6	868.027	926750	46330.3	11608.1
742072	40375.7	129.838	1.17807e+06	75142.3	789.859	1.27184e+06	53857.8	17103.4
199064	21889.4	81.1946	1.66442e+06	129977	1654.51	1.50906e+06	82205.8	25733.7
1.13384e+06	55681.7	98.6949	242565	20855.9	167.728	954065	51277.1	11020.3
852824	43574.4	196.081	649853	39500.1	383.299	226829	13575.7	3462.29
609207	41354	99.3606	1.57091e+06	73943	1009.23	2669506	77542.3	19106.5
1.06418e+06	48330.1	157.542	1.00275e+06	70681.6	1031.11	1.03939e+06	43046.2	11617.3
335517	35519.8	113.694	955626	43296.5	384.717	218827	20343.7	4494.75
853842	43812.9	132.783	318080	30067.4	386.488	291996	22992	4899.64
361023	30567.6	112.217	955689	50096.2	537.035	293575	28528.5	4779.83
582700	41174.4	152.994	269560	34142.7	284.891	386269	35624.3	6539.75
677878	37106.5	110.298	921473	49500.6	455.669	875325	47234.5	10424.2
1.08989e+06	48369.2	192.799	266445	23578.1	239.33	918380	52553.5	13171.1
862874	44024.6	79.3956	3.57708e+06	90076	1079.4	835986	38861.5	7142.6
253263	21881.8	44.9449	1.13729e+06	53234.2	747.662	6.76416e+06	157632	39192.4
377623	36147.1	78.0076	679007	39802.1	422.23	225257	15868.8	3351.1
1.06294e+06	48548.1	211.377	1.09182e+06	74169.9	1097.27	628040	40224.3	6921.84
370901	33675.4	107.417	666328	41890.5	435.74	592398	37229.3	10084.4
585601	35409.8	139.624	1.06977e+06	54163.3	514.245	888602	39449.3	10694.8
921867	38934.2	102.392	176484	16969.2	-31.5582	291345	23591.5	4365.83
654661	43430.3	125.198	1.30318e+06	52387.2	740.387	1.08101e+06	50912.4	11402.7
322923	28958.2	116.129	675956	39249.1	254.889	1.09835e+06	65512.8	11501.4
358525	29940.5	118.784	1.04146e+06	50200.7	542.357	195099	21084.5	3158.29
1250521	65633.9	170.949	653271	49208	354.318	278932	26023.6	4829.6
905715	46207.9	156.588	887215	82061.8	888.219	348760	38234.6	11583.3
1.41001e+06	74623.4	254.527	914209	50602.3	717.701	144678	18257.2	2008.57
934294	41541.3	142.05	3.36334e+06	84728.4	1118.02	649757	33288.5	8427.66
316322	41618.2	100.84	1.38902e+06	68215.5	915.047	990384	41129.6	12044.3
1.24087e+06	52294.1	171.169	234487	23329.6	132.12	522293	37995.5	8002.93
699416	32984.9	116.424	1.08391e+06	48091.5	798.486	362002	35540.8	7231.49
827793	40442.1	52.2315	381809	38723.5	379.897	269882	25768.1	5251.23
401070	34450.3	107.048	2104229	86453.7	1145.06	1087476	55851.5	11570
305799	28824.5	156.955	1.40883e+06	90182.7	1229.43	1239757	74260.9	16808.8
3.65613e+06	103272	299.41	983377	51817.2	640.951	1.00345e+06	54441.5	16144.7
1.33986e+06	54470.2	145.137	1.59987e+06	97085	895.349	1.19434e+06	87768	29846.7
1.02303e+06	50869.2	131.605	1.05522e+06	62847.1	653.034	866219	58609.9	17932.9
1.08873e+06	50881.3	168.533	740445	41980.4	530.048	1.22829e+06	78252.9	19157.1
350930	32505.1	130.722	278680	27154.7	223.444	1.2796e+06	99661	26616.3
355161	35558.7	100.026	692430	42889.1	380.251	362668	38346.5	8590.11
706234	45595.2	143.226	1.42324e+06	67131.7	698.289	1.04606e+06	57733.5	15297
872760	42134.2	117.973	153176	19272.9	43.0532	318114	25059.8	5455.19
284720	24734.1	85.0485	870051	46960.1	571.921	377022	32058.2	8959.21
736129	35954.9	134.549	300035	31153.8	297.83	791628	35465.2	11061.3
1.16601e+06	59458.5	152.7	341419	31463	437.567	622181	36329.2	5930.54
284139	28718.3	86.6282	1.47676e+06	60341.3	764.446	729254	44773.9	13448.2
693545	53168.9	136.021	692330	31775.1	298.764	870798	51705	9250.86
954226	44927.1	135.947	235560	25556.9	136.241	394379	35554.5	7730.98
589694	32768.3	83.2428	1.20248e+06	64920.6	939.051	772974	38161.2	7877.34
711884	43651.5	15.6706	896288	92201.3	1155.02	1.06606e+06	62003.4	12549.4
266787	25179.6	74.6678	816217	60606.8	718.103	11837412	145753	32562.4
690495	36743.5	210.504	1.69903e+06	110046	1262.96	1.2373e+06	62221.8	15935
897901	36704.8	203.15	1.17044e+06	62053.5	841.693	1.06097e+06	52916.6	9510.38
340650	26938.3	148.662	646829	45630.4	370.672	1.21852e+06	48141.7	10027.5
324122	27434.4	131.826	1.16399e+06	59074.8	615.142	1.26659e+06	67267.2	20047.5
898903	35469.5	90.7762	872951	63396.7	828.279	1.01292e+06	55146	13414.2
683606	40247.4	91.9608	747582	46689.9	516.673	375112	35194.9	7311.83
944957	45200.9	154.094	1.06968e+06	43181.1	556.227	1.55766e+06	77120.1	18501.2
221785	13645.7	161.794	385006	38527.1	268.32	344710	28742.9	6186.96
797821	39304.5	162.454	229968	22674.1	227.219	976520	49866.9	10738.8
1.23844e+06	55519.9	164.652	1.21733e+06	57389.1	763.05	867137	41582	9451.29
1.20076e+06	51287.6	164.652	1.0957e+06	55468	694.588	1.28267e+06	96400.5	24089.7
386799	34137.7	87.5172	387175	33673.4	364.562	352842	33283.4	5345.27
554502	38293.8	92.183	717913	43426.2	555.33	335817	32779.3	6114.31
1.29345e+06	51345.7	229.977	3.29077e+06	84826.7	801.239	267764	21959.6	4164.55
618894	35679.7	86.775	303134	23367.1	179.946	323027	31590.9	5557.77
244247	21303.3	63.2654	310785	31984.3	310.816	354148	34720.9	6962.57
1.17275e+06	59590	209.558	784974	58199.7	652.966	528875	37633.8	9884.42
955479	54357.3	174.535	218379	21467.1	120.333	900905	41180.5	8336.8
842275	41828.8	141.315	357020	32326.9	379.684	343601	31207.2	8758.14
673822	42809.2	144.182	398165	33376.1	323.418	1408226	64795.3	11399.1
377807	32657.4	165.165	329836	37607.4	388.896	2986395	76032.8	17976
263437	21439	155.782	599977	37383.6	381.953	377797	30594.5	6671.42
69133.9	52770.4	184.549	914265	47507.5	629.865	258748	27565.4	4709.66
284955	21890.2	98.2511	355484	37285.7	540.008	878450	43725.6	8946.29
858458	42316	144.99	356977	37577.8	463.022	311032	27486.5	6740.46
986865	47422.4	151.526	1.89053e+06	98839.9	1521.36	1.09122e+06	47659.2	14481.3
1.39638e+06	48286.4	223.661	339891	31654.2	236.214	1.0063e+06	42051.8	7871.26
293986	25435	145.651	247066	19006.3	294.957	193725	18802.1	2794.42
795682	37251.5	123.798	312399	29488	189.296	230954	22283.3	3290.38
250657	20379.5	123.798	889330	49331.3	572.952	740327	41561.4	10080.3
305257	32852.8	122.102	784303	48165.8	532.816	211317	18613.6	3455.02
667502	40529.9	89.5172	1.90414e+06	101637	1172.31	609481	35374.8	11045.6
719173	38702.7	100.322	903397	41966.2	399.579	1.2608e+06	57924.8	10850.4
820509	36142.5	88.7025	366868	44084.5	368.186	1.10656e+06	49978.8	10839.7
669938	83040.6	378.549	1.37018e+06	105950	1205.99	239630	18669.9	4044.53
343538	29850.9	96.1797	550892	35280	449.36	1.43503e+06	74366.4	13687.9
290450	26563.4	113.62	617700	44521.5	521.458	876447	49490	9503.54
1.06311e+06	35778.4	143.3	658778	38230.3	368.754	1.08964e+06	66271.2	14311.1
822140	39545.9	105.718	1.27795e+06	78979.8	896.761	685274	34254.5	11739.4
265380	21089.2	69.3144	627182	33284.3	333.425	1.12485e+06	83946.7	21024
1118725	65734.1	271.926	887333	62368.8	495.895	839107	42586.6	9950.93
343084	27704.5	72.0686	297433	26766.4	335.139	250123	20181.8	5676.8
600284	55381	38.8109	1.31734e+06	71251.2	787.542	300048	23288.4	5210.07
675215	40283.7	137.492	1.23754e+06	52105.7	769.963	363477	35143.4	5123.16
1.1174e+06	69131.2	195.424	315172	28930.6	212.323	1.07414e+06	56202.3	16218.7
388631	47596.6	166.19	1.27388e+06	54720.1	338.208	946877	57694.5	13766.9
694678	48965.4	109.116	738883	66701.6	424.132	370326	32129.9	6497.95
382315	34500.8	78.6605	278061	29483.1	6.8536	853093	42345.5	9501.63
788788	31183.2	99.3606	848018	39705.8	178.191	2107189	105478	29631.5
926073	47045.6	111.258	1.0316e+06	53761.7	430.466	921562	63706.6	14217.1
1.06085e+06	41370.9	233.458	822452	57743.3	506.606	328891	33482.7	6365.93
543609	26647.4	144.329	825379	46543.1	529.009	605865	42266.3	11839.3
910003	39264.9	96.9195	3397889	84972.4	905.516	261212	20149.5	3763.62
759179	44907.5	151.746	976677	52486.8	792.979	272467	26180.7	4832.08
1.37066e+06	64492.2	207.738	1.28591e+06	89396.4	1268.82	1.01235e+06	47668.8	10958
341298	26751.3	145.578	4.16179e+06	110380	1317.89	872039	56793	12840.5
972829	42872.3	156.882	588060	43626.7	505.146	616323	34069.3	6388.52
283183	24140.2	145.871	767438	38454.8	367.049	327586	29201.2	7845.07
860177	44695.6	117.604	923076	42341.3	399.367	282630	24820.2	4806.52
13007.3	23476.9	74.9931	2.81359e+06	75529.9	763.781	1.39124e+06	79112.6	22850.7
964919	42960.7	153.874	340955	25809.2	383.583	1.13481e+06	90108.4	23288.6
2.5399e+06	61192.4	308.737	272239	22730.1	272.791	3.10092e+06	78128.5	17188.1
566341	40002.2	72.4743	1.13232e+06	82570.4	837.387	1.17521e+06	58758.8	15912.7
920887	52086	94.4776	228924	24093.6	117.604	2.65522e+06	69215.8	15772.9
713332	42071.7	171.169	5224123	104319	1378.96	802162	85167.7	21874
2.39186e+06	67236.6	201.839	607157	53820.3	575.838	1339839	60574.7	11221
1.216e+06	55873.9	143.888	1.21778e+06	51177.4	806.605	319424	27829.2	4702.31
1.26097e+06	67874.2	244.399	1.30892e+06	54405.9	553.745	1.0364e+06	47927.4	10183.8
756299	42037.4	107.343	877379	39529.8	405.726	876042	42352	11564.4
906088	64325.5	321.701	212645	19691.7	126.819	180279	19383.9	2973.53
1.21478e+06	44399.3	165.531	202097	23300.8	190.536	738663	41801	9496.41
307895	24848.2	78.9055	335382	30232	333.853	1115631	49680.8	14227.6
972336	46461.8	227.437	320536	27590.1	315.759	1.09893e+06	53035.5	10399.8
360760	30533.1	109.855	852950	43704.7	567.382	723540	62412.2	12773.9
1.14702e+06	51986	156.148	1.34172e+06	63248.8	934.673	368707	34690.9	7767.62
1.98674e+06	130351	396.68	592952	56170.6	485.863	259149	26761.4	3755.57
255747	27114.5	94.9217	254956	21511	133.96	683242	37761.1	5691.49
390297	35368	60.2948	858726	44861.6	460.642	625610	31797.4	7258.53
872386	44523.9	188.566	338457	28753.2	317.55	828964	43189.2	8620.4
886660	48233.1	140.801	323506	26740.4	268.032	7.09275e+06	180052	41865.9
910171	38551.8	192.58	936806	67526.7	636.465	896237	40561.7	11900.9
826094	56315.2	114.505	302016	28525.7	269.402	789387	43663	7699.99
1.02971e+06	62460.8	155.855	1.073e+06	59711.5	819.454	210938	12886.3	3557.32
698380	41328.5	101.875	286761	26327.1	209.267	269680	21469.2	4924.77
933215	43847	144.329	767818	42059	506.814	597541	44839.4	8683.24
950808	47311.9	207.957	364705	36034.3	522.151	1.70221e+06	83621.2	29494.9
664302	41483.5	180.896	1.56515e+06	92480.7	1182.34	736716	38932.2	6453.4
828272	42808.8	201.985	915700	46851.4	487.188	5.10169e+06	105825	24593
622088	36941.1	169.924	1.14099e+06	64699.2	792.767	1.11051e+06	53742.2	15090.1
550384	38445.4	186.667	1.42941e+06	118872	1913.68	917777	74881.4	18880.6
368105	35556	63.5067	2.96299e+06	72789.5	840.917	617898	63437.7	11630.4
741336	43014.5	147.487	303708	24969.5	305.008	324909	33765.9	5237.18
1.24104e+06	66690	126.303	394292	43074	378.336	325799	32894.9	6157.87
357375	40517	71.501	1.38409e+06	78992.1	875.864	371745	32204.2	9807.26
340335	31662.6	77.2735	255294	23762.7	168.314	958584	46902.9	10463.4
876322	38598.1	173.218	1.05229e+06	48422.8	466.24	295120	27679.5	4979.35
1.3806e+06	97505.6	328.209	221303	18102.5	158.642	353098	29129.6	7030.35
979152	53549.1	171.169	263614	31815.3	288.56	368004	30672.6	6506.78
782115	39684.1	44.3928	873249	51990.6	578.997	352710	32649.8	6486.52
746378	40134.2	111.553	343829	28921.1	335.996	1.48286e+06	112146	30376.7
920371	47981.4	148.883	300123	36368.1	216.541	312498	29504.6	5186.98
603772	35371.5	83.5897	254524	27352.8	224.315	1.04245e+06	53759.1	12898.4
341962	30431	83.7379	321704	33737.3	235.561	253924	25795	5081.58
333315	28826.9	98.473	408412	30305.4	330.281	628410	42644.7	9196.71
263333	20645.4	10.567	197096	16201.1	166.63	4.8327e+06	120367	29256.2
1.04055e+06	63053.8	247.078	1.02917e+06	46327.9	476.443	252122	23157.6	4256.4
305272	33608.7	106.235	874439	52082.6	390.099	822585	45216.4	13589.2
1.07665e+06	56921	255.973	366068	33581.2	373.724	866602	53484.8	10644.9
1007884	48599.8	177.899	565998	50368	357.236	358330	32670.3	6553.66
1094582	55356.3	176.875	297290	26655.7	217.776	255409	22682.1	4789.65
376632	36183.9	70.6096	378004	36188.5	396.751	722380	40304.8	9080.36
243378	18278.1	96.5496	680176	42735.4	266.444	265514	25597.4	4199.5
405168	31587	97.3634	947878	53160.7	439.815	754616	43988.6	8505.11
367390	30289	115.981	311336	30245.9	262.258	879059	52478.9	14552.3
1.09534e+06	71433.8	259.875	281301	28538.1	222.572	996638	44225.3	9570.25
3577242	96779.1	249.682	336076	31626.6	295.819	1.2931e+06	135772	25649.9
404315	36256.5	128.66	1.05603e+06	73816.7	701.72	4.16385e+06	94662.8	23812.4
293164	26915.5	54.6195	1.05382e+06	56620.8	516.673	229656	21020.2	4148.39
273081	19962.4	88.6284	379210	54385.6	715.957	842683	37706.1	9954.25
272320	20463.5	14.2965	316194	29834.2	228.816	1.16165e+06	96229.5	18966.4
974779	54899.3	226.711	327078	31062.1	297.184	373947	32631.1	5818.78
957996	51942.9	147.12	2.64011e+06	157950	1860.87	249601	18165.5	5471.08
949459	55676.2	189.515	4709006	110024	1297.77	987004	49662	10448.7
1.53797e+06	80221	211.159	659218	40050.3	401.841	2.69352e+06	77931.8	13277.4
552285	29736.3	62.7027	2.12015e+06	103472	1148.8	242833	24244.9	3812.47
1.0398e+06	100974	369.18	198179	13236.7	122.029	4.88438e+06	96466.3	21654.7
360559	31036.1	72.799	1458321	75278	1571.84	3.30035e+06	84411	20400.2
1.07304e+06	50538.5	181.992	387213	36690.4	278.844	213767	14763.5	3557.96
618486	37246.2	130.722	338248	26902.3	298.764	264391	22636.9	3965.32
320679	26630	66.245	637171	37577.9	424.624	946120	44141.3	8705.62
614557	41810.7	90.1837	255242	25097.8	165.751	2.76102e+06	80196.3	16898.2
1.0208e+06	51451.3	162.454	388875	35524.2	365.059	337576	32134.8	5348.87
1.21948e+06	60937.7	212.323	267306	27939.4	256.045	669061	41112.8	8776.57
215402	21235.5	91.3685	370261	36600.3	429.27	352545	36514	6603.15
830210	42026.1	118.194	1.17836e+06	64812.1	1063.24	1.06331e+06	52603.8	10211.5
1.66064e+06	97709.5	393.001	979798	54098.7	686.975	352061	38447.8	7143.02
298525	24343.7	118.784	343344	31821.9	349.618	1.44753e+06	53955.9	17040.9
275547	24380.1	27.9795	987001	49976.3	528.732	1089067	54624.7	9911.04
1.06931e+06	51520.1	150.718	1.04468e+06	56762.6	770.296	678412	45343.4	10629.3
809074	38198.2	83.899	1.73978e+06	126326	1998.4	1.05492e+06	46396.3	13077.2
668220	30981.7	111.258	1142347	64439.6	839.787	1.21616e+06	52201.3	11815.3
814952	38370.6	90.554	1.18925e+06	86022.8	1064.15	255312	16901.1	6234.47
758457	63956	238.17	689453	41125.4	318.265	686990	41300.1	7647.67
343322	33017.4	104.462	966748	49473.3	459.522	854884	43598	12770.6
1.32749e+06	83463.6	248.163	659716	40811	473.021	1.1874e+06	54936.9	12008.1
7.05334e+06	169699	722.125	288163	23188.7	148.442	260664	15421.3	4364
375424	29835	145.798	622432	35032.7	454.128	1.43594e+06	59467	12389.5
876077	44889.1	124.166	1.30802e+06	68134	779.987	256992	24106.8	4264.31
1.32804e+06	75839.9	241.938	1.17958e+06	57423	795.238	675991	34374.4	7958.95
1.00319e+06	42639.2	139.771	886823	54728.7	482.725	268951	27103.2	4097.13
862264	43857.7	112.513	1.10844e+06	71414.9	1358.34	1150481	61145.8	17123.5
640513	39026.1	193.163	585884	40496.1	536.897	1.26137e+06	76223.4	23238.8
285030	27426.6	143.888	224392	25765.6	410.103	318099	22704.3	6320.96
767385	42345	131.973	306044	32691.9	343.131	276035	31406.7	4662.85
1070972	47168.6	195.789	1.0675e+06	51090.7	556.364	302330	26580.3	5863.05
1.4164e+06	68777.9	324.92	265830	25988.2	215.741	301523	26205.2	5478.56
364054	32017.3	111.774	588768	45091.4	645.027	1.18463e+06	62267.5	13672.3
805427	53216.3	78.334	261193	16746	250.912	260026	21953.4	4735.85
249884	23263.2	165.531	301770	32189.7	371.098	920639	44190	9879.06
264779	26956.7	70.5286	1.07851e+06	82104.6	865.909	275861	29401.1	4120.22
829259	44333.6	192.507	334515	29669.7	352.823	212057	17917.6	3856.74
345711	29459.2	40.9297	831641	41711.2	402.547	1.3897e+06	61125.9	18654.6
336242	29415	56.9336	811387	47575.9	401.911	1.30514e+06	61863	23689.7
981309	38324.8	110.888	780333	57299.4	648.489	326750	32163.9	5264.64
265580	27637.3	199.07	869603	48824.2	542.288	356565	36695.1	7819.23
648656	44374.9	120.407	579522	33751.7	442.835	297029	26122	5151.89
323484	29667	85.072	248668	23450.8	163.406	980603	66246.8	21700.7
385694	33927.8	120.628	1.13788e+06	48843	669.285	1.17791e+06	53222.5	11711.3
1911492	114674	443.115	825169	41445.7	378.195	343130	29995.9	6505.15
946273	40973.4	151.379	280884	28408.6	355.457	284840	21019.7	5536.31
236893	27630.9	65.4388	919362	47125.2	472.112	850177	48577.6	9997.88
1.01147e+06	51292.2	197.393	982648	48182.6	427.159	912349	41107.3	11039
272662	26730	102.836	1.10887e+06	48161.5	586.203	2.1807e+06	152135	42195.5
247576	20064.1	84.0344	8477831	132586	1457.25	1247513	59865.6	11815.5
1.26214e+06	72971.6	227.146	1144108	59757.2	559.947	352212	40278.5	9181.67
667056	35477.4	167.582	5.91013e+06	125712	1545.86	274918	24959.2	3768.2
730489	40691.2	163.919	712477	32268.2	568.62	279611	24524.2	4731.54
544878	33777.3	85.2202	269693	29466.3	158.275	1.0481e+06	48806.1	9128.93
282691	24287.8	130.354	3013569	131298	2397.43	331395	27029.6	6017.45
1.37502e+06	69004	329.781	586048	35575.9	251.129	876615	44022.4	8605.72
362083	32403.8	102.836	289798	30250.6	288.632	752566	47251.8	11502.9
751199	63239.1	84.0344	1.61064e+06	71357.4	960.937	1.31707e+06	61732.7	15668.3
343451	28195.2	66.729	207494	19222.4	198.414	1041530	51369.6	10046.1
215011	21957.3	66.8904	840531	53512.6	585.037	1.23683e+06	60720.5	12670.9
1.28379e+06	68350.8	197.685	1.04723e+06	38396.3	793.12	722843	44616.2	7915.32
1.02535e+06	41470.3	280.716	835720	43529.7	414.124	271023	36541.8	6326.68
298278	22689.2	151.305	788346	46250.1	378.336	899178	63310.6	14457.8
275858	25406.2	51.0396	1.11414e+06	78927.1	970.468	945907	64443.1	15522.4
807260	40944.4	160.108	274276	24884.7	143.3	806244	42420.9	9089.19
533890	40917	103.797	286457	28869	307.877	5599897	148093	41600.9
755587	39120.5	90.1837	306881	30100.1	279.276	249786	17484.6	3634.63
336001	30703.4	113.398	1.27446e+06	60355.7	758.857	267192	26654.7	4308.79
331222	29522	86.6105	205041	23856.3	233.966	291696	26477.9	5369.06
1299474	57314.2	245.63	366449	30344.7	296.681	334765	25918	6533.61
1.1931e+06	74294.1	285.107	318435	30208.2	404.455	324436	29708	4894.49
331091	32962.5	120.628	3.0597e+06	132431	2447.56	1443773	56660.6	13030.6
537743	41539.5	113.103	993772	53749	509.037	1.03282e+06	54251.2	12640.2
720875	40173.5	158.275	908652	50557.4	450.903	625462	29214.7	7954.22
306437	28555.4	52.7881	372164	33701.2	289.351	1.41368e+06	56759.7	18843.6
371267	36142.2	96.6976	349125	28309.3	257.852	281475	27698.3	4479.92
934758	52513.9	97.1415	862656	55217.4	467.569	1.25942e+06	57015.6	11194.1
608159	47045.9	200.309	372830	36623.8	399.438	1.2922e+06	83549.3	18851.8
356889	34665.5	54.0618	1194244	56459.2	643.193	811798	55497.4	13191.5
289129	27725.2	146.386	223610	38669.5	480.701	926045	47709.9	11429.8
805194	42570.8	184.476	889397	36079.8	534.961	328821	31638.2	6836.76
960810	45870.3	168.021	965518	48815.5	500.905	311223	29584.9	4232.05
1.01487e+06	48471.1	170.876	1.15464e+06	59421.2	536.344	678662	39845.4	7406.58
334534	32004.2	70.6906	1.00297e+06	45362.1	620.326	1146307	55320.3	14698.6
637356	43630.7	188.42	289882	26800.8	252.503	760306	37485.8	7582.09
268026	23558.3	106.161	317223	28379.8	260.164	955987	85066.2	26161.5
966005	39757	211.377	1596019	69453.3	1268.75	327186	31712.8	10787.1
777959	36676.1	143.006	711634	36882.5	324.062	383998	31421.3	6971.11
614122	47880.7	105.718	895826	50885.6	438.199	802998	39731.4	18021.4
383457	35995.7	88.4062	281198	27992	375.144	3561935	82948.3	16609.1
1.58897e+06	78299.2	258.936	307924	28414.4	270.267	797220	34922.1	8514.92
1.191e+06	59320	277.835	340347	29558.3	351.541	360258	30256.8	7086.97
755293	46412.6	154.314	758219	63458.7	770.229	279563	25443.7	5969.87
313686	28116.9	85.8131	1.35166e+06	64589.6	749.93	1.00785e+06	48679.2	13774.5
2.49411e+06	100571	284.891	615235	38535.8	362.073	2.04944e+06	77535.3	24395.2
340539	32953.6	37.7924	382636	45244	341.562	2.94461e+06	85125.8	19839
1.23741e+06	51168.8	204.316	342490	36747.4	402.971	363226	32436.1	7313.17
731566	43597.3	202.568	288135	25572.4	240.054	382267	36619.2	6401.51
387499	34898.9	92.257	268872	24487	249.972	377161	33336.9	7752.52
257898	22365.6	89.5172	858149	38391.8	441.641	1154452	55625.4	16868.6
1.29629e+06	65897.8	286.114	806234	47479.7	474.767	1.07361e+06	52911.2	13405.7
999434	38951.5	156.882	982437	48658.7	670.029	342076	33367.4	7875.71
1.08765e+06	46682.9	234.256	630116	36625.2	424.836	279528	26714.3	4482.46
1315832	61462.2	219.739	987674	64354.3	875.299	294348	28012.6	4852.41
660082	36222.1	135.506	637430	36218.7	530.325	963459	61682	13910.2
327425	27555	43.132	1.218e+06	70691.2	1000.68	316486	27658.2	4530.54
686802	33891.3	92.257	1.59084e+06	75794.9	875.44	1087256	49873.7	10728.5
302183	24442.9	95.8097	382752	34076.6	309.239	1.04255e+06	61547.4	13044.5
5.39769e+06	96579.8	410.103	887380	70946.2	897.961	248586	24985.7	4104.83
1.4341e+06	64358.5	149.47	215293	24375.5	167.948	640827	29284.7	9160.63
378605	38600.7	84.4736	283702	29731.5	266.444	1.20337e+06	66532.3	16405.9
302536	28458.2	121.439	1.12464e+06	49950.2	733.237	270718	24639.4	5178.58
529227	32949.2	34.2757	298775	30030.6	317.836	717351	34142.2	8857.69
275703	22951.5	135.211	591648	34552.2	423.85	332658	28935.5	5493.1
992096	48857.2	160.841	254599	29051.3	222.064	1.20526e+06	64997.9	16348.6
1.00754e+06	60729.6	166.337	1.18266e+06	54419.3	663.873	891995	41354.8	8180.42
1.63211e+06	58911.3	196.445	581422	32920.6	440.939	643236	40140.5	8846.67
294117	22272.3	75.4813	1.24943e+06	55030.9	505.563	4.24835e+06	92634.7	19330.2
341055	27044.3	98.3991	327182	29816.2	249.899	618000	38039	7882.28
353558	28938	27.5922	794183	42061.8	488.721	858807	43699.9	9103.38
279401	23676.1	37.949	5.01171e+06	123424	1625.28	339168	30248.6	5580.22
741963	34743.6	116.719	2140782	94894.1	1143.72	770921	69416.9	9624.54
669682	42775.1	142.491	2.21486e+06	103803	1643.64	286775	30263.8	5122.81
302791	23615.8	80.2947	1.206e+06	58850.7	821.925	845030	41824.7	8771.34
269642	24544.3	73.6111	1.17823e+06	76730.1	1069.66	954573	53626.7	12197.9
343237	26296.8	113.177	7.69088e+06	172484	2333.4	389052	35689.7	7961
354264	33644	94.1816	1.3921e+06	109138	1204.15	284325	25227.1	4646.33
1.42027e+06	63778.9	194.695	778791	42208.2	248.453	355574	27300.5	7925.42
1.16289e+06	54495.4	244.544	248612	22018.1	144.329	205880	18369.9	3479.31
1.08282e+06	56800.3	182.504	3.85697e+06	191212	3003.39	329480	31039.6	8627.67
348826	34741.3	142.197	1.19968e+06	56539.2	760.055	267069	24849.2	4102.14
1.16362e+06	70050.1	126.671	579448	39540.7	235.779	270534	21136.9	5324.65
1.0833e+06	60307.4	274.377	329952	27406.2	337.566	1.12189e+06	73286.8	19470.2
633302	40147.8	134.402	282024	28862.2	332.568	340218	32296.9	8323.46
374511	30141.6	73.5298	1.17279e+06	57583.5	711.73	250011	21975.3	3608.86
757958	50736.2	121.66	354040	31322.9	203.369	316826	29602.1	5882.18
1.12184e+06	59011.4	200.528	348621	34561	539.386	1.02422e+06	48898.1	11908.9
818395	54106.1	145.798	1.3102e+06	74172.9	951.759	297213	28125.9	5195.17
1625036	93013.7	259.08	910399	38079.3	758.391	273575	22991.8	4941.51
202153	20005.9	8.89778	906633	41604.8	409.044	655014	41122.7	7732.04
729119	37950	98.0292	685618	42043.1	437.075	895248	43351.8	10564.7
1.0046e+06	49125.9	126.745	799285	49388.2	436.021	323097	26457.5	5319.99
906818	52079.5	137.786	927205	45033.6	323.847	401516	33539.1	6585.57
382182	59166.5	236.358	274173	24116.2	241.793	1.03958e+06	64569.4	13155.5
1.10852e+06	45635.6	184.769	995237	43841	794.038	687617	48141.4	14559.3
297669	26816.6	51.9135	2.06467e+06	115923	1599.65	216086	21332.8	2844.9
779776	48608.4	88.0924	313122	27409.1	194.768	289372	26640.3	3929.74
366952	33666.8	70.1237	245478	21591.4	220.175	1.06109e+06	60552	12099.4
630181	40029.2	293.52	842946	47439.4	537.796	4737772	111421	31247.5
656125	36182.4	183.454	911081	42245.9	635.581	824766	38478.5	7838.01
395734	31857.6	99.9522	1.65099e+06	78672.3	1415.81	1.11824e+06	55560.4	21703.3
1.0346e+06	58662.2	233.096	404243	36488.7	290.07	5.27228e+06	154614	34175.3
346900	30558.1	122.618	229773	27116.6	390.099	728031	40520.7	7804.76
351666	35616.9	163.406	206951	20001.3	104.314	243394	20704.6	3110.42
2.31865e+06	199483	854.048	892604	49789.2	435.599	745060	42000.7	9639.94
230906	22425.9	110.593	1.06303e+06	51201.6	585.654	223586	18932.9	3401.51
731794	40283.1	149.69	945658	50198.9	467.149	248361	22594.5	4328.77
315319	24625.4	100.1	192230	17829.5	229.759	323425	32510	6725.5
338716	32444.9	136.756	341363	35517.8	396.751	816696	37421.6	9858.23
1.19325e+06	47679.8	226.275	297003	26830.3	268.104	730428	35495.8	8434.3
239435	18904.6	82.6689	610738	42015.9	362.429	356240	30433.2	6043.78
1.0628e+06	63761.1	229.033	294687	27258.2	307.877	315894	24732.3	4357.15
825099	58112.4	152.406	1165841	87355.9	1463.47	986688	58157.2	16844.5
1.99872e+06	116898	302.855	1.29687e+06	102122	1410.87	939030	44206.4	10033.4
930202	58489.7	287.625	389114	32687	376.279	614775	39210.3	6953.68
322677	30324.6	103.205	5.48949e+06	102946	1197.87	730709	44253.4	8173.79
587147	45737.4	143.888	1.1853e+06	64822.3	630.205	756341	43855.7	14245.7
630577	31307.9	111.479	329188	27419.3	172.706	964985	58681.7	14601.6
1.10081e+06	81152.4	357.663	1.24744e+06	50623.8	636.669	291962	26738	5798.8
997953	43610.3	118.489	1.06433e+06	50219.6	568.207	848154	44131.5	13088.3
294631	26603.6	155.121	1.19617e+06	60587.7	505.633	668526	30473.1	10780.7
303173	30415	151.379	378700	33248.9	340.492	344886	28685.8	6471.55
372789	35190.5	37.8707	1.41926e+06	65589.3	777.864	201981	20326.4	2994.64
1.04174e+06	56206.5	110.224	1.16911e+06	59531.8	548.571	335478	32481.8	5166.79
340714	31389.8	185.718	1.28161e+06	105970	1085.26	173084	22726.2	2785.1
293055	23149.1	52.9473	1.0916e+06	58572.9	574.945	368297	40956	6338.89
856655	41217.9	153.507	295569	29195.8	90.7021	907147	49052.2	9643.04
668485	40470.4	269.474	257412	25148.7	278.988	1031887	64410.9	11893.3
1.17598e+06	55691.4	243.748	1.07728e+06	78564.6	1033.37	969566	53837.1	10812.5
1.01275e+06	49624.4	224.025	982227	49909	525.685	355371	31856.3	7162.3
328599	31136.1	36.6187	2235137	67285.6	740.387	1277842	78350.4	25594.8
383554	33816.3	123.134	573079	32958.3	437.707	378337	36194.8	10248.6
577593	44946.9	95.5877	254906	21203.7	121.144	522576	46024.1	9904.47
975281	52416.8	206.209	816512	70108.4	1086.68	256793	22522	4366.33
294484	26008.9	6.92922	2.57592e+06	110193	1274.26	333940	30197.7	5646.87
1.42545e+06	77610.2	210.722	1.0051e+06	54006.6	590.042	1.18522e+06	90487.1	21351.8
1.00465e+06	52410.6	167.289	345251	28588.5	269.33	331913	29833.8	5663.6
302578	28613.4	83.9811	820274	53773.2	632.315	751251	41566.9	7075.39
567100	34146.2	142.932	751308	42771	376.421	575163	36013.1	8566.53
264284	22860.1	70.6096	334632	26480.9	264.784	217444	18968.2	3533.11
1.26268e+06	75562.5	181.627	2.68776e+06	104040	1457.96	988228	61367	12868.2
1.22253e+06	58127.4	130.354	256526	19969.6	304.864	651004	33809.3	7584.35
1.15129e+06	50839.5	181.262	392136	34997.3	399.084	703749	35970.9	7477.81
250848	22658.5	-38.6182	853451	50189.9	455.249	1.08564e+06	90060.4	24029
278278	25931.7	116.129	376293	32526.8	452.235	1.37189e+06	74009	18415.5
387804	37026.8	139.036	866458	36435.3	453.006	652827	35020.4	8287.03
1.04376e+06	57252.2	216.759	608896	37238.7	464.351	1.60075e+06	81418.6	26765.2
904438	36129.2	88.1099	1.0296e+06	53597.6	714.482	715878	32651.6	8748.33
309452	26541.5	29.8405	2.24937e+06	98225.3	1243.27	791166	54656.9	14304.8
655876	50309.5	213.341	1235981	69248.8	789.595	884439	64982.9	11606.1
785337	38892	134.623	798858	49912.6	419.835	1.07717e+06	45906.1	14602.3
298429	23553.7	98.8429	125486	16041.1	80.9491	590558	35186.7	7340.14
860762	47283.4	62.3813	1.48461e+06	79274.3	997.296	3.64455e+06	96205.3	25151.5
949535	43879	237.228	288099	24862.1	216.831	283297	23459.5	4431.84
358865	33522.9	177.753	372192	36071.6	406.644	2.69543e+06	73055.8	18198.1
317920	30607.2	159.228	378564	36615.8	410.385	885234	40488.8	9688.01
2312830	86418	382.094	889870	50618.5	612.616	834976	47203.9	10304.7
1.54386e+06	124697	315.115	987921	50013.1	822.49	533784	64798.2	12817.9
792313	47432.5	140.58	950802	45338.3	487.606	267432	24968.2	4141.04
227596	18501.8	71.1767	357802	37698	342.775	641715	33007.8	8927.65
692835	45916.7	101.357	777181	46528.9	538.902	1.45592e+06	59026	11908.5
281936	21834	51.9135	893872	44954.2	396.609	835805	36763.8	7922.03
749926	44038.1	215.45	738667	35926.1	402.759	2.85285e+06	87859.4	21312.9
976059	49410.6	256.84	793960	46706.2	434.404	290768	31814.6	5735.47
295818	27209	133.445	271974	25261.5	170.656	663963	33601.8	8738.23
344933	32041.4	68.0209	866016	50845.6	449.431	785641	45538.6	11017.8
356322	33761.1	74.0173	265096	24508.9	200.236	304742	27012	5429.42
1.24657e+06	71152.6	216.686	894261	77081.6	915.541	1.84885e+06	120092	27580.6
395768	27250.5	106.752	673849	40278.7	389.037	1.17555e+06	82993.6	18869.3
372656	43159.6	105.127	293920	27708.3	283.164	294910	29724.4	4900.35
866220	51412.5	189.661	1.11117e+06	80174.4	1154.73	291675	29473.9	4997.42
332115	29626	89.5172	241299	19545.9	164.798	858618	38505.5	9088.83
1.25983e+06	83450	175.851	981208	47405.4	504.103	1.14927e+06	78096.1	19667.6
258087	24194.4	25.0407	681794	43090.1	531.709	744672	39174.2	8285.97
322719	29228.7	71.1767	1.4487e+06	57815.4	753.729	166860	11473.4	2876.74
1.04312e+06	55843.9	119.743	1.20075e+06	58313.8	571.989	620028	33054.5	11050.5
1.07986e+06	57514.4	312.249	2.12864e+06	91959.2	966.232	790588	37657.4	9427.15
281298	31280.6	129.102	763260	41602.1	381.598	358696	29160.4	11491.1
318278	23151.7	144.769	392804	39643.3	289.135	227187	20901.6	3401.93
391964	35869.6	39.2029	998473	79323.5	1031.82	895311	56693.9	16931.7
1.81287e+06	104503	233.603	1.1417e+06	55168.6	746.795	911268	48875.3	10951.8
877525	49472.2	159.595	329726	31107.7	479.655	134702	14067.3	1857.91
827224	57213.2	128.071	714316	39999.5	366.054	797028	40100.6	10048.7
1.06061e+06	58968.5	122.839	299143	24360.8	227.727	369971	38791.2	7625.79
265857	24431.1	74.9118	3.91698e+06	88495.9	1161.86	926789	50067.8	10224.2
1377177	66265.6	210.868	4.08489e+06	115270	882.429	776294	54157.3	10912.1
2.33522e+06	94814.4	271.421	1131575	74488.9	1050.18	941746	51989.4	12284.8
1.06638e+06	52226.7	123.503	840006	50560.8	769.764	1.00983e+06	55347.6	14588.5
277262	23049.7	101.579	704371	42459.9	503.964	768246	41584.4	8360.31
509910	32072.1	101.949	360778	43744.9	424.906	852060	48618.4	10680.5
314821	29794.2	88.7765	346160	37523.7	365.841	281318	26873.1	4866.18
780544	37435.2	127.482	2.76732e+06	107570	1633.97	953933	49315.4	8631.56
265310	23316.4	86.9245	809145	44917.2	511.051	236920	24597.8	4310.06
540673	37025.7	127.85	339697	31009.2	256.334	350521	36967.3	6016.6
355281	28691.4	178.118	1.08521e+06	54382.6	503.895	1.12139e+06	52442	12166.6
1.01631e+06	39926.7	216.323	1.06059e+06	50517.3	429.411	1.38644e+06	66862.1	17666
1.01659e+06	47338	269.186	309470	29546.7	203.078	959597	67672.7	15307.5
347588	28559.3	138.448	4306410	94112.6	1606.43	1.16168e+06	73802	21043.4
281872	23133.8	98.547	839214	64366.4	862.944	971976	63539.1	16600.1
5708486	167745	513.134	804857	52370.9	471.903	162132	17761	2082.35
953054	43625.4	104.905	1.06825e+06	50133.6	669.285	331584	29229.3	4890.46
903486	68837	115.317	691293	42816.1	281.076	702779	48672	8599.93
277184	23354.9	168.753	365901	29858.2	281.508	338765	28445.8	5667.84
336018	35075.5	99.2866	1.18837e+06	74802.8	913.846	298454	33330.8	4500.68
841673	46453.1	111.996	1112777	55480.2	746.128	292110	27081.6	4630.72
1.42045e+06	60072	224.751	365195	33219.8	374.718	1.52185e+06	87989.8	19996.6
1.10041e+06	53687.9	168.607	923657	43875.6	505.494	5539614	104023	22358.7
253994	24295.4	73.2861	1.36392e+06	60089.1	911.587	714757	37977.6	11794.7
284642	25782	104.536	382217	27186.6	494.99	1.49708e+06	70581.2	13816.1
608212	37671.9	128.734	829952	41585.9	431.31	808470	40806.2	14709.2
1.04174e+06	58321.1	173.657	252530	20595.9	233.241	245082	22810.8	3441.26
755309	44633.9	152.406	8777150	202716	2483.5	301232	25477.7	5270.64
362994	30767	206.792	358147	32351.3	346.696	366479	30370.6	5936.54
1.05313e+06	52853.7	181.042	343613	29157.3	404.949	812309	57344.1	14160.1
1.09166e+06	54517.9	200.965	1.58728e+06	107272	1601.14	286782	26862.9	4627.48
1.0094e+06	57622.2	200.455	3.96683e+06	111918	1512.89	927552	53779.7	10263.1
1.45988e+06	89542.6	336.852	1.0067e+06	48816.2	649.642	203507	13700.6	4059.15
719642	35862	89.2209	1.18543e+06	66614.4	1059.71	956441	46186.5	12168.7
842443	47460.1	143.888	1.21686e+06	58956	613.64	594675	38229.8	8443.76
1.22046e+06	52149.1	198.341	1.64544e+06	84541.1	1100.58	796479	40583.3	9689.43
1.03484e+06	46114.9	74.9931	648000	35804.2	420.469	1.22278e+06	61761.5	14978.2
634021	40309.6	80.9491	765904	41541.7	463.511	306157	28539.4	4373.53
287119	23937.2	26.7409	406385	36235.9	437.496	748812	42245.1	7728.72
1.07875e+06	47813.5	179.142	927262	42385.8	637.485	277862	23897.8	4075.74
791858	47224.1	100.766	1.28379e+06	64326.7	701.72	1.09578e+06	48454.3	13752.4
1.38929e+06	66992.5	301.851	1.4218e+06	63184.7	864.85	1.14376e+06	57965.1	16520.8
1.10121e+06	50500.9	157.982	209397	20269.5	21.1885	747178	27272	10197.1
714249	39385	183.015	283668	25352.1	241.72	1.00774e+06	51767.2	14793
986109	49955.1	186.959	929183	54178.9	599.629	534030	58670.3	13540
706736	56181.1	204.243	227646	27896.5	389.745	744052	40235.8	7957.82
898365	46456.4	152.773	358542	36307.3	362.429	924044	47120.5	10534.1
956872	65198.8	172.852	594658	47167.1	508.898	1.0064e+06	56518.5	13761.8
309359	22624.6	128.144	1.83813e+06	134258	2245.15	298166	28072.4	5334.32
235576	19053.7	122.471	396768	37705.2	276.034	287441	27744.9	6393.04
2226065	96163.4	345.627	990341	55464.8	661.91	327959	26461.1	5232.31
869046	64924.5	221.991	2807066	107936	1464.74	593031	47479.5	11584.8
1.15736e+06	51844.5	164.652	849464	37766.7	466.939	397031	78140.2	22659.9
328094	30207	19.1152	887997	41169.8	602.366	290046	23678.5	4801.15
285939	26909.9	36.3841	542879	32135.2	345.484	905427	93294.9	19356.9
1.28796e+06	66444.7	253.443	7679350	141888	1838.49	572406	34301.6	6147.21
317316	26376.2	103.723	970749	62028.2	469.247	1.13349e+06	46236.5	13301.6
877039	81021.8	295.604	354090	34779.2	81.7677	270296	24394	3954.38
396675	33118.4	138.448	859402	47105.1	223.226	400506	41798.7	5418.62
808269	85613.9	184.695	370693	31712	126.598	953647	50839.8	8514.15
1212619	62225.7	235.489	1.04449e+06	46671.8	327.708	744762	39080.1	7016.72
340687	30185.7	31.161	1.02225e+06	41557	465.33	758294	39992.6	6434.2
1.11009e+06	57668.8	156.515	1.02189e+06	59127.4	531.155	363366	32873.3	6360.57
248348	26376.9	115.981	251376	23236.2	221.846	346384	29741.9	5025.03
271165	22891.3	50.4046	1.00244e+06	43010.9	643.465	397850	37264.3	6880.04
987460	53297.2	131.016	636014	33804.1	401.346	268176	24836.8	3738.34
894186	46620.7	153.947	327309	30074.7	238.243	1.66561e+06	56651.1	10841.3
1.226e+06	62425.9	168.607	1.24015e+06	111964	1397.1	1.26124e+06	62259.1	18233.7
903859	50031.1	190.026	386184	39713.2	490.254	909881	37074	8867.29
329059	29222	61.5783	4.4598e+06	104633	1371.83	1.1698e+06	63234.2	15852
799387	42340.4	93.9596	1.84786e+06	178191	3316.08	241363	22551	4079.2
1.08128e+06	60331.4	237.301	1.16283e+06	114111	1040.64	692881	39984.7	7695.47
1874099	113847	365.272	145853	20426.9	144.329	1.2756e+06	53927.6	13942.9
963330	48213.4	200.382	201520	20998.6	225.186	234673	21037.5	3296.53
962875	55066	166.337	826346	37400.2	479.026	1.29146e+06	59253.6	16427.5
1.00729e+06	48219.7	154.094	868341	44133	481.12	688342	64981.8	12666.8
1.07857e+06	60049.8	194.841	664747	44403	336.138	403806	38268	7169.71
1.04893e+06	54370.8	166.41	861939	45877.4	526.516	804527	40024.2	8894.89
2.65734e+06	70361.3	290.429	1.09059e+06	61464.9	771.292	1.57588e+06	67969	18682.7
1350699	57179.2	256.334	1.0494e+06	57606.8	537.519	243214	19689.3	4668.42
292427	28966.1	80.2129	743718	47236.8	499.444	808759	84984.9	18133.6
1.1054e+06	53499.6	137.859	381052	34856.7	375.641	330372	32627	4971.37
967229	40469.5	131.09	1181602	50183.6	735.51	974790	81964	23201
954752	44962.7	149.25	1.00128e+06	63676.4	621.963	1.05323e+06	55175.9	12151.1
287967	23532.3	97.0675	713956	40609.2	425.751	11484440	140366	35247.1
328350	32053.6	103.797	918303	54709.9	656.423	277930	27178.8	5872.44
544048	33578	116.498	1.93676e+06	95401.1	1119.22	250936	30349.3	5100.5
1.21603e+06	58353.6	147.781	950322	52920.8	537.243	888968	71241	16416.8
1.28638e+06	61043.8	208.102	1.71453e+06	94154.5	1740.15	912481	37775.5	11634.5
212572	18836.5	6.55117	217527	16789.7	193.747	245510	20802.6	4143.73
349416	32553.6	115.243	357007	34273.1	359.94	906500	43622.9	10333.9
1.23038e+06	59701.9	275.674	295715	26971.7	264.063	855753	41735.7	9926.29
625552	41193.3	160.548	4.29522e+06	90084.9	1098.89	3.35018e+06	74970.8	14080.2
308885	27678.9	106.826	1.34348e+06	119867	1404.8	234874	25447.4	3448.81
938122	44519.8	240.272	1.05396e+06	45368.3	451.254	1.03905e+06	45345.5	12547.6
315313	26640.3	93.8855	1.11983e+06	51256.1	553.055	1138294	55450	14088.2
680189	46467.8	118.932	1.1499e+06	63667.9	775.608	254596	24855.3	4137.72
798925	38073.5	121.66	241832	24057.7	115.834	1.07099e+06	55882.8	14458
964699	64774.8	251.346	975444	39852.8	538.764	597432	42887.4	10580
1.42296e+06	54144.5	151.452	401424	35461	254.889	755260	49466.8	8301.15
375948	31865.2	51.2779	1.02444e+06	68856.9	741.589	848804	39611.1	8892.21
1.17108e+06	85438.7	401.205	236140	24376.2	123.061	696948	37127.1	9207.16
328207	28465.1	115.907	807158	52968.5	538.556	587161	46765.5	9696.7
640542	42049.6	135.947	1.14252e+06	50686.2	599.013	1.02338e+06	45141.9	9869.88
363049	31527	131.752	3.24931e+06	80489.4	885.959	330132	31194.3	6677.28
357693	30854.2	170.51	1.06739e+06	82494	1026.1	1.00924e+06	44684.5	12367.2
951308	50706.7	131.973	1.46062e+06	77415.1	987.835	269144	26881.3	4599.24
546421	33988.5	95.9577	232274	25299.7	140.286	1.04611e+06	45526.2	13180.3
410086	37193.5	61.7389	366041	39537	380.96	613007	34820.9	8929.28
1087896	60207	213.85	339393	31970.4	357.521	318432	31058.7	6024.23
347642	33211.1	7.23178	1.24727e+06	67179.8	892.525	1.03106e+06	49181	12280.4
1.19533e+06	57201.8	198.633	909009	43531.7	714.414	907610	70872	17726.5
662217	38058.7	149.69	5747800	141345	1676.96	317931	26828	6840.72
334497	31459.7	85.7881	1.58623e+06	78473.7	773.683	294286	26974.1	4894.35
1.13326e+06	65449.4	164.872	334557	27421.9	198.195	841806	41926.1	10182.4
349435	33458	114.727	1.25386e+06	75067.8	755.128	1.04565e+06	47222.7	11944.1
1.02998e+06	57139.5	221.846	1.1938e+06	60751.9	579.478	2.78326e+06	67773.4	18381.4
1.24534e+06	60321	208.248	1.13496e+06	49140.2	440.026	315116	25736	6372.14
324116	32717.1	110.224	966605	47168.3	494.224	726245	37508.8	9878.56
696499	41584.6	122.766	1.30407e+06	64323.8	678.339	856125	45964.8	10138.6
920141	51137.4	152.039	397523	43424.7	362.642	634977	32206.2	9221.49
307396	23095.7	46.6032	976208	47322.9	479.724	379950	42572.4	10415.1
781897	41723	207.083	1.28257e+06	70126.5	724.336	3.27549e+06	155680	29472.8
280989	17406.7	99.8043	252625	22963.6	223.661	773880	47650.2	12550.4
1.06501e+06	55635.6	110.298	397462	34093.3	393.709	957731	46849.7	11976.9
207169	16933.6	51.4367	377456	29621.9	362.713	914511	56886.3	12438.6
910597	39388.8	184.988	1.15668e+06	72882.6	912.576	547170	30507.3	7595.01
367311	31962.2	60.4552	265007	26752.7	283.308	779171	45742.9	9345.18
735387	38932.2	108.082	720926	48783.9	515.91	3.41547e+06	90407.4	19519.1
1.20095e+06	53921.2	171.462	375376	30745.5	359.727	355099	26832.7	7160.04
635867	29834.8	184.622	2166543	62987.6	569.721	1.06528e+06	52356.2	14059.5
349217	28762	1.50151	227948	25534.8	75.0745	291918	24219.7	5111.02
1.30917e+06	68501.8	221.918	1.04669e+06	68945.3	879.182	1.11443e+06	58595.4	17039.7
954881	66944.4	168.314	382213	37036	333.282	1.03528e+06	46861.3	10426.6
885764	38401.2	181.042	358631	25751.9	407.35	883467	52404.5	10486.1
820145	44480.6	147.341	192629	19282.8	102.762	4.07949e+06	96741.6	22693.5
1.24963e+06	69685.4	179.069	869085	55334.3	699.097	256949	25322.8	4285.7
719734	37059.4	127.85	933432	45162.1	533.715	620936	40226.5	11190.8
341477	32051.9	189.077	681622	38313.6	483.562	247522	20914.4	4954.07
347532	36445.6	134.843	1.13878e+06	69497.5	832.727	304241	24172.5	4859.19
1.10915e+06	101094	275.025	232146	23026.8	110.002	989397	77880	17244.1
1.01733e+06	55719.8	172.267	1.14838e+06	67300.3	968.279	341421	30063.1	6204.54
13831.4	3393.6	1.12588	1.25302e+06	68363.5	1038.67	732275	45417	8018.47
614914	37856.7	77.5182	354624	27142	229.179	3.82487e+06	85776.3	24293.6
372517	35215.3	81.2765	1.24889e+06	69526.4	837.528	827688	49827.4	19262.8
909733	54685.7	162.38	1.03902e+06	48900.7	634.493	973865	46803.8	7950.05
990733	50279.2	25.7358	707481	39296.9	381.102	3.78284e+06	86427	19593.5
339516	32042	78.7422	1446184	107156	1424	233189	20842.7	3633.08
738997	39653.5	92.9233	367484	35784.7	277.547	609574	38555.7	8904.35
575301	37663.8	92.5531	605860	45978.5	344.557	223599	22428.9	3599.47
1.10262e+06	48513.8	160.695	1.03047e+06	44066.6	490.045	917645	44230.9	8534.13
1.2239e+06	64518.4	215.232	835512	42091.6	457.561	212811	18314	2818.42
313778	28346.6	118.268	338159	35728.8	307.733	600232	31329.9	7472.94
395256	43728	30.9278	1.00199e+06	40740.4	613.026	858764	39023.3	10103.1
335424	30674.2	138.301	925691	47176	409.68	324774	29999.2	5331.71
380363	48353.2	106.309	1.06756e+06	100311	910.175	601272	31412.8	8597.67
974459	41888.2	230.63	1.19522e+06	57713.2	542.771	646742	40968.2	8922.92
888071	34530.9	230.339	1.02009e+06	62035.8	659.608	1.14349e+06	72866.3	19749.2
1.04208e+06	52381	175.925	4931358	95849.1	1022.78	576070	38113.3	7513.89
994130	49712.7	189.004	895307	71853	931.779	2.28319e+06	71032.4	12504
253126	21914.2	96.6976	1193164	73556.2	662.723	2.93114e+06	72374.7	18626.6
1.19892e+06	58269.1	121.586	853382	52291.3	423.286	307995	22731.1	6399.04
1.70092e+06	74381.4	155.341	626279	40562.5	495.408	232258	26780.6	5786.87
914485	51109.9	76.0512	13605724	147016	1989.65	264869	21537.7	5216.14
924540	36751.7	100.84	899349	52564	777.001	344074	33555.3	6264.48
1.13973e+06	46308.4	249.899	348245	30473.5	296.968	382185	31704.4	8989.92
602809	34045.1	114.358	919077	46075.9	503.756	327703	28548.5	5244.45
881670	49146.2	196.664	1.8258e+06	145872	1926.04	846752	75311.6	25510.1
988364	58128.6	98.3991	1.07716e+06	50757	631.839	388134	35044.1	6375.96
336736	27302.6	147.561	1.09641e+06	45478.6	417.368	1.07214e+06	69570.9	11454.2
354266	32749.2	103.279	241409	16931.7	249.176	1.04176e+06	37614.9	13695.1
357950	31847.8	142.418	3664258	84250.6	975.833	373863	29589.1	7159.05
1.02113e+06	53898	180.238	255246	21594.3	253.226	1101128	71302.4	16728.1
1.023e+06	49517.5	227.8	854307	48554.6	569.17	268957	27108.9	4716.36
375517	28419.8	82.8328	3437096	108907	1217.14	277311	27717.6	4691.86
371388	34575.3	138.007	942371	47892.9	600.45	371749	34010.2	9906.17
1.7314e+06	57539.1	180.458	734045	61412.5	738.517	1.3059e+06	60775.8	12514.7
802190	47804	150.792	1.12938e+06	50229.2	586.408	928888	58036.7	11339.1
524012	36200.3	95.6617	3101434	129987	1575.02	751276	44705.8	8337.79
349736	34756.7	136.536	1.16124e+06	65649.6	637.417	356964	36871.2	8558.98
1.0245e+06	66419.5	215.45	1.28571e+06	87810.4	950.417	237627	22204	3408
379261	41438.7	140.507	1.01201e+06	58351.5	669.218	695512	60427.5	19591.5
336109	25486.9	111.479	1071771	51091.6	603.118	893585	51485.8	12187
754731	38252.5	86.9245	1.04705e+06	50080.6	495.199	1.42139e+06	91034.9	17303.4
616644	35902.9	36.8533	248395	24834.5	104.905	1.26515e+06	52173.7	17256.7
1.192e+06	56629.3	216.686	277626	26590.8	60.6957	300988	28869.2	4891.73
1.06612e+06	50355.2	106.383	815245	41506.6	393.709	526644	48035.3	10033.4
279357	24643.5	38.1057	1024652	53914.1	588.602	3.1058e+06	72048.6	15438.4
1.31148e+06	56063.6	210.286	252615	24641.6	290.07	227716	21828.4	2894.74
307294	26488.7	49.3736	1446319	103042	1112.59	3693135	103374	23946.9
343213	30426.8	22.5733	369659	26583.7	511.884	270204	26579.4	4550.45
742007	42376.2	50.3253	1.05464e+06	53796.3	618.758	768799	56734.2	15385.2
1.07874e+06	58866	981.693	1.01753e+06	45026.6	618.485	775770	37064.5	7840.62
836340	39975	-28.0282	371517	33763.4	266.372	884664	77532.1	23776.5
1560794	96311.6	340.92	1.20404e+06	52928.2	743.258	228876	26375.8	4012.27
1.17648e+06	49371.2	137.786	1.25366e+06	83201	699.029	1.18038e+06	52191.4	11735.1
1.03718e+06	58099.5	166.483	306875	28238.7	258.719	226339	19995	3289.4
1.27404e+06	88834.5	237.88	337960	35633.1	423.427	1.15912e+06	62581	18741.1
915352	61212.5	220.102	1.19154e+06	52112.5	600.998	894049	55732.5	12324.5
1317199	66676.9	284.315	332909	33879.3	402.194	733209	45654.6	9457.5
1129235	63177.7	225.695	730572	44400.2	363.353	271964	27394.2	4601.07
805862	48101.2	183.307	250943	32368.4	277.547	309312	31102.4	5623.08
575855	41559.7	86.0354	387011	31609.7	404.243	1.00553e+06	49416.4	14063
804104	40686.1	162.527	331344	28910.7	304.219	853035	48031.7	9429.48
992322	50585.3	172.267	3.09258e+06	82151.3	929.167	203881	17868.9	2761.02
371353	33271.4	75.9698	1.25185e+06	73254.4	804.416	710068	39391.6	9112.62
1029748	62300.8	234.401	805622	42058.5	402.689	292922	28863	4738.53
275531	23588.5	106.752	1.19601e+06	67854	885.959	389804	31410.7	7381.09
1.33987e+06	115915	480.981	994192	44753.7	646.588	372910	33276.8	7294.46
1.06082e+06	47833	128.955	2.74274e+06	83217.6	1081.17	346501	25679.1	5703.77
375237	29769.8	189.442	326958	28153.2	421.103	311052	29550.2	4832.99
797997	43093.5	182.504	327376	29632.8	252.358	1.06206e+06	51881.1	13791.1
1.02421e+06	41165.2	125.419	933558	50885.4	570.202	3.38212e+06	93112.5	22320.3
254593	25087	-6.2834	1.39032e+06	62471.5	1103.69	671432	40155.6	11873.1
674732	40829.9	91.8868	290902	17915.2	253.732	827476	43071.5	7980.27
1.10939e+06	42837.2	185.937	863871	44670.2	597.85	1.07032e+06	38133.2	11327.6
659420	35112.1	107.713	942001	45377.4	695.732	1.01166e+06	107268	15835.4
629378	37643.7	134.181	4.52901e+06	110566	1208.11	342650	33143.7	5568.72
354329	34312.5	99.5085	818977	42659.3	293.233	312540	27016	5710.34
703300	40349.6	182.138	339714	34751.8	312.249	1.21944e+06	55134.9	11196.5
1.14538e+06	56266.2	151.379	937930	46667	538.349	843375	40121.8	8559.76
335033	36207.2	91.5166	623954	38112.3	419.412	1.03635e+06	50067.5	12440.2
333183	57226.1	261.247	659942	42185.6	583.459	758557	45050.4	13184.1
720906	36937.6	89.5172	1.04181e+06	50871.9	554.296	168278	17645.9	2340.46
812015	43645.5	158.569	283553	23890.9	213.487	401835	36685.2	7963.26
5177267	125247	521.181	1.30981e+06	94640.2	1303.98	653858	33824.2	8696.3
891808	42412.2	182.065	920168	50739.4	470.505	295874	26357.1	5045.64
1.41109e+06	69919.8	286.618	1.53906e+06	75075.1	876.64	799271	46064.2	10405.9
930983	42208	184.111	1.63889e+06	91847	1030.62	951813	58111.1	13746.1
390522	38915.7	97.0675	696948	39322.3	309.812	292309	26975.4	5294.58
1.00588e+06	59167.5	171.901	307843	25581.5	220.611	256051	28530.7	5817.02
723604	36844.2	171.974	976616	62685	638.844	284737	25741.1	5817.37
909745	55831	240.851	815831	40226.5	423.075	630000	38877.2	7846.41
919595	47110.4	127.85	985303	43317.4	446.835	1.10889e+06	53659.1	10324.1
181079	17985.3	96.4756	2451013	65441.6	843.67	247916	21464.8	4013.68
639427	40430.9	113.767	1.03976e+06	50268.8	532.539	710535	41709.8	9427.92
338300	35903.4	64.8749	879830	52630.1	407.421	748642	38198.5	9498.74
1.5792e+06	66960.3	326.565	1.82087e+06	91141.3	1239.45	247610	20098	4496.37
1.14546e+06	50140.9	141.242	559360	34819.3	363.353	609895	78153.7	17880.5
1.28663e+06	72299.6	159.888	1.00906e+06	52975.7	625.575	1046585	58322.8	14009.5
709789	42161.5	91.8128	1.28354e+06	61686.4	721.991	1.08376e+06	72863.7	22970.4
1.16213e+06	83241.8	238.243	305255	23713.5	273.656	260915	25003.2	4559.77
1.00739e+06	50249.8	213.414	1.29106e+06	79306.9	673.814	378657	32597.1	5834.45
777879	42235.9	115.096	1.03485e+06	49198.1	626.46	213732	17133.6	2833.39
327455	26882.2	86.6928	1.09117e+06	43689	716.091	1.04809e+06	43510.6	12085.3
375330	39645.3	146.165	356001	32896.6	419.13	767313	44845.3	7765.01
319359	29568.8	9.88376	774330	39558.4	442.273	1.23512e+06	63424.2	17391.5
1.26806e+06	73080.1	272.791	1.83426e+06	91901.3	1411.22	802234	42454.8	8489.23
1.19248e+06	62341.1	228.38	328852	33181	311.461	1.23922e+06	62668.3	12818.8
312217	26720.4	112.144	327474	30260.9	302.64	1286499	79357.7	21672.6
367445	42945.4	113.251	1.42356e+06	72990.4	1054.62	390342	35271.6	7448.37
683115	37916.4	114.432	1327621	67770.5	662.113	676636	35564.6	8543.66
1.06043e+06	77283.8	263.124	374459	37142.3	499.027	320394	28138.6	11653.9
268739	21396.6	78.9055	1.12829e+06	61369.9	677.327	750491	38283	9525.71
285350	18620.7	96.9935	1.75721e+06	99173.2	1805.88	278358	25843.5	6099.7
686169	32463.5	123.134	179687	19176	89.6653	264243	26886.3	4200.42
339649	30552	109.559	1.87847e+06	152317	2663.74	208505	18472.1	3722.88
1.41522e+06	70384.4	223.589	805112	39535.2	581.194	1.27036e+06	68097.7	16166.7
586727	32512.3	65.4388	290143	22076.3	294.31	283591	40337.7	5773.17
942306	47237	148.589	1.06548e+06	43002.2	629.116	737528	39853.5	7233.32
677287	35458.8	131.973	1.33815e+06	75874.7	1289.3	831339	41200.1	17118.1
862662	41703.9	177.606	602081	36523.9	406.362	250958	24248.9	4902.18
346488	27258.2	125.345	795379	43322.6	655.678	1.0296e+06	49586.5	10625.8
305082	24417.3	90.4799	1.19843e+06	51751.7	618.621	953918	48562.9	10725.3
859440	49455.4	228.961	195158	15936	160.475	5.9053e+06	114000	31449.8
290567	28573.6	48.8189	718113	43989.7	425.188	297399	30801.4	4487.55
752115	40576.1	147.561	2541760	77601.2	803.287	1.3721e+06	66852.8	13637.7
715021	36671.8	51.993	1.65931e+06	72653.7	1050.32	1.18349e+06	54623	13302.1
578454	37248	122.545	671678	37162.8	461.412	1.00062e+06	41670.5	11179.1
941249	43939.7	138.154	1.37044e+06	73796.2	1044.53	884554	43578.9	9787.77
675561	49356.3	134.402	317621	28829.3	323.633	1.06462e+06	51226.7	14075.7
868511	37639.8	75.4813	231953	23508.7	150.865	693156	45289.6	8697.28
633266	37217.5	81.3583	344649	34556.1	321.057	259370	26201.5	5159.45
375106	38667.3	205.554	769171	40799	332.782	1.76099e+06	87892.5	16945.2
703160	39176	166.849	796792	36038.2	511.468	379758	44444.7	7067.55
558274	35819.6	84.2273	322688	27806.1	300.271	961915	44858	11271.4
1.30731e+06	64812.5	274.809	1.2251e+06	89253.6	923.307	928336	41386.7	10939.1
769775	38407.1	126.303	915865	39517.9	628.639	1.70238e+06	105289	27410.6
1051162	38055.7	125.124	715172	47053	514.245	716195	45489	8581.29
848684	60815.3	176.656	1.07981e+06	49269.9	622.031	674481	38912.3	7197.95
1.10979e+06	66647.9	252.142	717467	44370.7	424.554	997504	44554.5	9488.99
1.18938e+06	73028.3	137.05	578111	38989.8	327.566	316702	32206.5	6494.85
337854	27379.3	74.9118	1.14088e+06	44488	773.683	695034	35571.6	9865.36
1.02508e+06	68001.6	226.421	384667	35454.8	331.067	1391753	91759.2	23711.6
316669	26639.1	111.922	1.47695e+06	80327.3	888.501	1.05548e+06	65619.8	14922.4
726070	61438.6	194.695	282922	23624.2	201.111	832150	49731.9	13615.6
1.06786e+06	60406.3	182.723	1.26357e+06	96137.7	1046.01	1.17205e+06	54682.7	12102.9
333967	34182.7	88.8506	1.17516e+06	96829.9	1375.85	309695	22294.8	5517.53
568704	35718.9	121.439	1.13584e+06	54947.8	722.125	827491	45499.4	8739.93
964780	51612	145.945	320519	24508.6	180.019	790784	46451.1	11485.4
1.09536e+06	55027.7	177.972	1.26216e+06	76558.8	1028.71	829462	60126.8	13484.7
1.09277e+06	81470.6	232.298	335428	32864.9	555.675	620874	34587.8	8458.94
321785	26761.6	85.7881	1.0096e+06	53189.5	692.972	360166	35553.3	6009.4
971348	59435.6	214.068	337984	32181.1	350.971	325683	33562.4	8286.46
305023	23261.1	21.8806	881469	50831.9	666.715	348826	36726.2	6347.08
934220	50007.9	132.488	1.23007e+06	91987.7	1130.73	2279924	61570.2	13084.7
276951	11817	122.766	1.10084e+06	50488.2	715.756	624844	37059.9	7578.2
1.20247e+06	73599.2	152.406	653946	37263.2	396.751	256736	23170.8	5453.36
1.48182e+06	58983	184.549	752379	45323.1	502.643	238054	15647.1	4644
1.41352e+06	89245.2	325.492	321404	29759	275.674	368620	31219.9	7660.45
635188	42254.8	159.595	1765601	89218.7	1188.55	4.69374e+06	95548.8	20187.2
1.18726e+06	51408.1	255.395	294493	28705.4	243.241	986995	49490.9	11770.4
1.2687e+06	78418.8	298.405	1272936	74843.3	816.348	254194	24911.7	4630.44
1.15694e+06	62158.7	240.416	1266949	59268.1	782.904	346031	34290.8	5356.21
1.72953e+06	93567.8	412.149	933426	79280.7	689.738	787930	40578.4	8271.07
351150	27594.6	108.451	310164	32642.4	183.819	314653	29386.7	5160.93
302853	25697.6	60.1345	1.68329e+06	103273	1430.21	308123	26413	5355.29
883864	48940.3	214.141	1089607	60340.6	539.869	754235	39593.2	7295.03
799966	42117.3	139.551	1.00674e+06	42139.8	491.647	264653	23413.4	4360.47
331152	28217.1	165.897	673879	33182.8	235.344	1.21416e+06	62141.1	16084
892535	45514	110.741	1.23608e+06	57625.4	514.73	967270	49337.9	9487.72
327471	30076	112.882	234089	21320.2	60.5353	4603558	120284	24843.6
340035	35732	24.1918	893348	46221.5	587.711	267437	22385.9	3997.02
296319	27531.6	103.427	923622	43086	485.166	1.22613e+06	52907.1	14168
1194803	48047.3	145.798	720517	49838.4	705.215	206609	21862.9	2418.9
659448	64893.1	179.727	729531	48024.7	891.749	643078	32584.3	11350.9
334343	28650.3	51.993	900551	43374.9	630.478	714402	30323.2	9665
643248	42636.4	117.53	4.11688e+06	165371	1828.61	2.26147e+06	164896	45825
305724	24639.6	97.5114	370165	34539.9	250.116	563369	36407.2	6284.53
1.34773e+06	60423.1	214.796	2.56268e+06	79148.8	670.705	379910	33064.8	8394.83
997362	52656.1	228.816	341570	29539.9	209.631	834394	41446.3	9913.86
868819	36947	151.819	1.30452e+06	142261	1697.93	289416	28121.8	4126.85
699108	87978.8	1262.75	1.59444e+06	76339	795.309	887709	46587.8	8154.3
712915	39976.5	169.778	371679	43547.5	375.924	1.1637e+06	89395.5	25266.1
812464	43047	135.138	921277	52071.4	510.079	306833	30648.4	6250.5
580684	41263.6	110.372	1.1361e+06	59837.8	592.509	354524	33530.6	6431.17
384666	35827.5	90.1097	863305	60584.2	772.554	255470	24629.4	4255.49
367422	39234.4	112.144	973001	52798.4	532.47	324920	30798.8	5349.43
1.08802e+06	46143.9	162.161	6.33709e+06	119102	1387.43	587842	33265.7	5822.59
279528	17214.5	42.1088	883482	47574.8	520.557	378329	31537.3	5667.34
923168	58444.1	211.086	229114	17888.7	236.286	320177	30885.5	4920.54
1.00611e+06	59569.9	178.776	1.09967e+06	48432.3	529.286	290268	24840.2	4482.89
831901	43751.6	167.582	887464	35654.7	344.843	1094930	59402.1	11940
960985	50178.9	177.022	922152	47465.8	520.834	625718	35307.2	6511.65
719484	40485.5	98.3251	305953	27922.1	310.816	298862	24048.7	5706.32
932197	40319.7	186.375	1.01333e+06	50772.6	525.616	896327	48115.6	10674.2
259617	19390.5	111.553	319791	27656.4	206.865	379772	36849.1	7029.22
753494	36017.3	140.066	236488	22315.2	197.976	840608	47354.9	9247.26
1.00405e+06	47311.4	194.33	3.46158e+06	98943.4	1434.17	306545	29979.5	7031.9
921131	50425.5	99.8043	381664	37845.6	491.578	920360	71140.9	14975.5
1.192e+06	60380.1	191.996	207997	19711.4	118.932	1.74151e+06	91151.5	23859.9
3.44363e+06	105989	477.91	1.17125e+06	51750.4	706.425	1.45406e+06	69006.8	19445.6
209210	22179.6	105.792	353344	33044.3	341.348	248523	24927	4547.35
233954	16629.9	106.088	1.31963e+06	58746.6	740.053	2.94255e+06	78069.2	14687.7
232071	17326.5	25.4268	1.21179e+06	60450	650.049	786839	34660.8	9898.68
378839	37999.8	93.0713	1.01087e+06	46526.5	783.036	1.00316e+06	52717.5	9293.71
724642	38080.2	92.183	640651	44842.8	385.212	548362	48369.1	8001.17
302492	24262.1	2.40371	1.07979e+06	48049.3	418.496	900580	59578.4	12708
279239	23594.5	19.6523	377804	36825.6	295.46	736192	49193.7	7475.34
892157	55774	156.882	326847	28180	353.962	302079	26000.9	4988.38
611255	38857.7	67.7785	946806	45043.5	679.69	239486	18333.7	4307.16
398782	43064.9	143.594	980314	49200	620.531	297092	29410.6	4785.27
1.10756e+06	51662.8	246.571	178625	18607.9	1.05078	1.5622e+06	78147.1	18504
337987	30291.5	44.7082	386916	36749.7	457.21	286334	30112.3	4808.5
1.21481e+06	56885.8	217.195	632322	38852.4	503.617	654334	35255.7	5972.12
1.10318e+06	48185	217.704	1.48224e+06	76305.8	1005.13	400836	41912	8655.91
266571	27351.3	48.502	1.61374e+06	100493	2240.14	1.22651e+06	62151.2	11745.7
1.43242e+06	55471	213.85	1.80013e+06	83501.2	1137.37	338389	32967	8177.17
959230	45248.5	165.531	928846	49174.7	441.5	819528	55950.9	12042.5
273914	23936.1	55.0181	287175	26543.6	200.965	918202	43635.8	424.132
1.22046e+06	101322	345.555	352541	31088.6	386.559	518511	36423.7	8782.78
371577	30645.4	189.588	915139	42738.6	543.048	247450	21910.8	4194.49
279904	22990	110.741	981986	53280.5	505.007	216400	20834.6	3535.79
309702	24854.5	105.275	315274	30242.2	261.969	300423	28825.2	4307.73
325352	31061.2	75.4813	622368	33598.9	444.309	285250	25144.2	4380.73
875634	55607.7	136.462	621458	38067.2	413.56	303066	27975	5169.19
678343	41360.9	86.0347	867545	45649.4	419.13	936627	52631.9	12467.3
320852	29457.3	65.9224	1.09051e+06	46428.1	563.253	191619	24909	2775.85
827479	45895.2	151.599	327736	30583.9	335.067	348091	30868.5	7078.85
929261	44226.5	143.373	1.07943e+06	56099.1	645.027	844928	48953.4	10491.7
698233	36498.7	146.533	4.8514e+06	101700	1190.17	285571	25884.2	5246.43
880532	48639.1	155.195	3043989	150103	2137.2	667521	41330	7967.07
279156	24309.6	88.7025	270502	21472.8	202.932	373360	35356.3	6686.17
942233	47098.7	162.234	956491	46078.1	569.583	195515	25124.8	3431.44
941461	60225.1	219.23	846196	42909.3	449.29	302302	27040.7	4859.47
783651	36289.6	139.845	324215	34266.9	339.707	366929	33836.9	6120.95
253436	24769.7	79.2322	5900446	120700	1386.09	1.04704e+06	45627.2	9317.15
277920	22488.2	84.2568	869635	46917.8	450.693	763605	46546.4	10478
342626	34308.4	97.9553	968708	40206.8	462.462	315189	28283.4	5695.02
809285	44212.1	161.647	741276	50031.5	344.415	287307	28074.5	4702.24
277423	25721.5	178.411	1.09856e+06	76175.7	973.009	369725	35018.8	7114.64
828326	43679.6	182.723	1.06688e+06	57460.7	554.503	572206	32747.3	7999.9
976300	45233.4	128.586	1.01418e+06	52393.6	642.65	578670	48565.4	10920.5
898997	48079.2	189.588	1.59114e+06	59837.6	715.89	1.08098e+06	49511.6	7935.44
356460	33834.1	179.361	231941	26039.2	125.935	968194	51831.9	10079.6
1.22642e+06	59931.8	237.083	283944	27024.6	249.899	255537	24287.2	4037.61
392515	37792.6	149.397	306861	30150.7	229.251	352769	31054.1	6041.81
623290	40517.7	136.462	719139	46098.9	415.253	902723	54402.3	12567.2
710573	40568.4	1.12588	828091	40296.6	404.384	252677	25789.8	5884.3
276114	23233	52.8677	1.08974e+06	51045.9	628.163	712420	43308.7	8395.75
1.12639e+06	53672.2	229.686	724988	40452.4	354.247	635948	36076.7	7601.71
1254664	54194.1	175.486	971663	58641.1	546.569	1439349	63452	17063.3
1.07154e+06	53231.5	90.6281	581396	31301.6	442.905	370543	33111.3	5888.96
1.39915e+06	74753.3	98.621	340916	31739.2	433.631	1032866	98703	21660
333308	27563.1	38.7325	886175	50375.4	607.767	734555	46764.5	7627.48
2.69406e+06	183674	844.588	764649	39456.4	557.605	337792	42424.5	7858.06
939309	46380	214.723	763174	44158.7	515.841	710446	37010.1	11080.2
310799	27410.5	122.25	1.05152e+06	52484.8	612.958	306671	30059.6	5290.55
1.01445e+06	47528.3	213.559	1.14666e+06	56413.4	759.323	1.08132e+06	38380.3	14153.9
994787	49147.8	231.21	284881	26194.8	179.727	320395	29170.2	5216.21
1.28713e+06	60747.1	231.863	997133	53533.2	678.475	296266	28039.3	4454.72
1.12722e+06	49192.3	136.83	1.4583e+06	81900.4	1258.09	275294	24922	4841.61
668498	41702.1	121.66	671016	36877.9	386.488	204451	18533.4	2906.25
360001	33837.5	165.677	1229183	82111.3	620.94	882310	51707.8	10868.7
286862	24698.6	69.9618	1.10937e+06	51772.2	511.398	877641	49772.6	11451.7
395340	43129.9	206.792	969355	80045.3	963.761	791518	46389.9	8460.99
895130	47429.5	151.305	521412	39051.5	533.024	700025	41750.5	9056.99
344883	33536.9	95.0697	914048	70148.4	801.734	200713	15978.8	3431.87
1.08132e+06	46904.1	158.642	4659145	95010.3	918.788	1.2162e+06	85684.8	20344.2
1269526	56414.7	123.724	1.05494e+06	63382.4	621.895	269166	23264.6	4305.05
881005	44523.4	50.7221	1.04539e+06	53761.5	583.87	995820	49338.7	14848.1
233812	19544.3	119.153	1.20861e+06	58376.5	673.138	347994	25936.6	6572.37
362458	28300.4	87.5913	1076254	57606.6	672.395	799984	40509.4	10585.6
1.14801e+06	54373.6	217.631	274267	22253.1	261.969	1.06229e+06	62113.7	11404.1
664593	33462	113.546	6182132	157082	2291.11	700395	40171.8	7569.17
758738	41522.8	107.048	272738	27884.1	216.759	602704	35227.1	6688.86
236835	16750.6	75.3186	1.04674e+06	54186.3	515.077	1.02083e+06	63031.6	14416.3
274810	26055.5	69.1526	262368	26582.3	168.314	645453	36366.9	13847.9
232470	20235.4	86.1836	352576	45487.9	519.101	693126	50554	10364.2
913046	47682.6	161.061	676875	35404	345.199	367459	34926.8	5726.37
1.08461e+06	42987.1	219.23	279020	25613.3	278.628	362598	34968.4	6037.29
601279	34278.9	184.403	632725	34869.2	601.271	224908	17660.7	4286.9
625665	34993.4	104.314	975446	50533.2	589.219	866503	72535.1	15609.7
333284	28865.6	25.1951	987288	52219.3	562.082	248617	21413.8	3263.63
592540	40089.7	127.113	373413	32148	274.665	1.01428e+06	49695.1	11393.7
976595	47456.7	238.75	679493	39440	480.004	279698	28491.5	5594.49
255821	18668.4	65.4388	560231	39602	477.7	239492	24971.9	3746.53
1.27762e+06	77499.2	191.85	920383	59936.2	563.046	1.16972e+06	56595.3	13749.2
1.01832e+06	54922.6	149.69	654916	39258.9	371.098	354515	31461.1	6221.48
204847	17908.2	62.4617	928805	62484	785.091	872845	48216.6	8715.92
507628	31797	65.1165	971385	50344.5	547.95	254381	23718.9	4847.96
291838	21189.9	-5.5068	312974	29009.6	264.929	984424	51647.5	13172.2
349160	26155.2	84.405	253783	19706.6	234.256	766351	46137.1	11195.1
552419	32469.6	133.445	339580	33549.1	256.262	158347	16999	2005.39
251617	38476	87.0727	759627	38102.1	493.04	388067	30284.4	10455.2
669734	47642.9	130.28	1.07589e+06	57977.9	610.568	234896	16644.2	5147.02
4281655	245114	940.604	2.07398e+06	60683.2	773.218	902909	47380.7	10956.7
328967	28462.6	-7.413	281896	23695.7	257.491	4.25416e+06	93974.3	17291.4
869217	43589.5	133.372	934229	45625.4	403.96	784243	46177.2	14825.9
268076	22405.1	11.8591	707843	40791.6	553.331	361936	34148.2	7085.35
529661	37078	84.8021	1.64712e+06	67380.4	951.406	1.24086e+06	64016.7	18117.6
951400	83844.3	288.56	281552	25755.8	263.918	1321480	67380.5	18064.5
270519	22297.8	102.91	624633	38955.5	282.228	944169	52079.5	10431.6
2.20167e+06	139157	350.259	844730	41308.7	452.656	335944	27537.1	6063.41
1.88791e+06	154347	609.475	907349	57653	778.66	380884	33417.9	8744.02
309381	26654.2	52.2315	1.02413e+06	60368.2	612.343	2.29813e+06	103449	28716.1
764314	43260.3	139.11	1.15722e+06	65150.8	508.065	703097	42430.9	8836.51
359211	36901.5	81.9315	249178	23819.7	150.865	286270	27736.4	5816.38
1049322	53383.5	80.4583	1.5024e+06	110672	1634.81	1601960	90402.9	21283
2.79603e+06	72356	244.399	267338	24761.6	188.931	308141	27321.1	5333.55
769961	41623	147.855	778930	44937.7	510.01	983594	78394.4	20848.2
1.06349e+06	46438.1	156.222	5.08159e+06	136946	1693.13	969672	50736.1	8498.19
278463	26207	120.554	340926	34002.6	115.17	1.15424e+06	58061.9	14599.5
301447	28444.1	50.4046	396056	37180.4	375.782	315775	27183.5	5432.88
1.16429e+06	50699.2	189.077	310639	27445.7	309.597	1.04713e+06	56487.3	13287
796408	48054.6	154.241	574260	33930.4	269.33	2.33977e+06	88369.5	34024.4
318843	31025.4	116.129	962999	49494	566.831	940107	49620.3	9372.15
838095	41569.1	93.3674	307381	31629.5	271.998	1103138	66150.4	16900
835356	39253.6	162.161	964955	54284.2	529.148	725462	40074.7	8055.67
236885	21255.8	57.1733	326139	28423.9	212.977	635494	36015.4	7300.46
790370	47681	117.752	946653	54839.3	498.679	1.01076e+06	60960.6	16796.7
248118	22649.6	83.4068	299582	28382.2	291.939	869758	44198	9401.73
773806	41030.7	118.637	1.03264e+06	48801.3	530.948	748379	38439.6	7197.39
958518	43905.4	180.969	615170	83365.6	1319.02	247292	22863.7	4577.56
805922	38723.6	131.311	300320	24984.6	162.967	1.14464e+06	61238.2	13425.6
1.02548e+06	45433.5	167.728	1.37046e+06	73333.8	1110.26	986705	44457.8	11401.4
358037	45108.7	251.708	7413576	131003	1955.27	362117	31589.7	6351.67
819834	50215.1	165.238	276415	23366.7	172.267	376404	39575.9	7938.26
822548	40366.1	99.2866	610061	47229.5	550.434	639515	34019.5	6919.79
238567	19275.5	8.14011	227392	22538.1	157.982	287740	20609.5	5135.23
1.25714e+06	55697.8	140.654	271644	25090.9	227.437	767230	42574.5	10046
345122	33184	103.723	1.61022e+06	100470	1273.77	847605	43790.1	9262.86
273458	25478.4	114.432	3.9689e+06	94551.5	1260.92	1.2196e+06	52199.1	8937.32
326412	28960.6	43.3683	896337	48640.8	429.411	1.41961e+06	90512.5	27796.2
836823	48863.7	201.111	374592	29201.9	265.145	542169	28952.7	9351.39
709460	46405.3	133.372	351715	34867.9	262.619	353793	30562	6324.49
991200	47341.8	85.9613	257824	22767.7	235.634	603556	39114.6	7635.39
658324	37434.8	83.2428	357655	35671.5	380.18	351285	29906.4	5891.01
1.08895e+06	52325	214.796	729478	48267.8	400.568	842326	49052.7	15753.4
693993	53461.3	225.114	1.08467e+06	52772.9	546.638	198062	20650.4	2485.4
363547	34054.8	178.557	259603	22205.3	368.896	820841	54036	11265.1
308329	28923	72.0686	1.00271e+06	53195.3	700.711	301820	30813.1	5058.28
646436	41185.4	138.374	1.22919e+06	50070.8	660.623	174498	18838.3	3031.63
860883	47780.4	114.284	340064	35186.9	277.259	818470	44435.6	8752.78
1.16474e+06	75632.4	266.372	986167	59252.1	623.871	1.42447e+06	93663.7	24987.3
943558	48488.5	121.807	750635	41641.4	468.548	398626	39343.4	7803.49
3109998	227865	1273.34	2.31668e+06	148302	2047.05	1.13834e+06	60647.3	16523.5
854985	42283.5	191.485	378288	38319	392.86	563319	32798.4	8049.46
556355	37183.6	158.862	282896	23892.3	288.2	354445	38659.8	10165.4
740445	40667.4	129.323	991208	76423.3	954.512	220395	20310	3713.35
311439	30116.6	79.2322	300549	25713	269.474	241531	19160.8	4270.24
1.05613e+06	50855.3	90.7021	190394	14071.6	301.205	533136	35198.6	11983.3
999743	52511.1	149.764	1.61987e+06	71694.1	1210.01	809653	42160.3	8602.82
633787	36467.7	144.549	290986	39923.9	557.605	3.60665e+06	105150	35524.6
232110	19400.1	99.0648	244688	22427.7	155.488	596826	42957.5	12343.4
570026	35888.9	129.912	579635	29329.9	652.83	328713	29203.2	4458.18
267949	24050	58.6128	2.4067e+06	137988	1624.44	785786	41853.5	8943.89
1.08958e+06	57164.5	168.021	226656	19887.5	198.341	313109	30250.9	6583.73
935236	51415.2	103.279	1365974	62377.1	745.728	998453	48563.5	11112.5
330699	24147.7	8.29159	263751	23438.1	218.503	310827	32127.9	4499.2
802202	38558.1	144.108	937784	69308.6	691.827	349580	34400.4	5643.34
4248247	185025	644.959	830692	50669.7	502.018	294687	29784.7	5300.51
646201	40221.1	123.134	956325	50271.2	402.689	236632	24866.1	4840.27
854670	42468.8	131.311	303261	28131.2	352.965	1.05519e+06	46720.4	13145.9
836020	47073.1	93.2934	1.34819e+06	76417.9	1084.35	701532	36022.5	8523.26
297719	24497.2	64.7944	978317	54497.8	480.911	1.17208e+06	56834.9	21994.9
361181	36888.6	126.156	1.06165e+06	48738.4	563.115	313736	26184.6	5551.21
2.08714e+06	144156	476.513	1.11612e+06	49184.2	582.155	323553	33331.2	6356.05
846485	34794.3	161.501	1.46622e+06	76078.9	641.291	263018	21229.2	4231.2
245328	23099.9	84.2273	1.04683e+06	68127.5	1019.39	904462	57046.2	12189.2
877248	44985.7	47.8687	1.24634e+06	57763.3	491.717	237118	23015.1	3987.7
1.02161e+06	56999.4	111.479	348685	32908.1	378.904	209428	21434.5	3731.77
1.59411e+06	68142	168.094	1.05187e+06	54112.5	690.884	903754	61724	13933
698202	40107.2	84.1452	1079662	66535.9	663.196	251422	18585.1	4140.97
877495	52911.3	141.462	4.37662e+06	93682.7	890.266	344277	30092.9	5166.23
1.02647e+06	53433.1	148.002	621391	42589.1	640.612	249226	20069.2	4203.03
296679	29884.6	34.7438	275835	25535.4	106.088	267842	26499.1	4953.37
1.01243e+06	52591.9	254.672	303946	21807.6	206.136	607145	43178	6338.04
803828	35929.8	139.551	351062	34020.7	263.485	754027	40739.3	12133.7
313962	25054.1	156.148	296378	30383.7	403.112	594212	35491.8	8142.72
348456	37109.3	152.627	383804	42605.8	544.981	542492	37569.3	10100
539084	32632.3	112.734	761888	32682.4	441.852	2.41274e+06	96487.2	31756.2
1.39189e+06	106540	433.279	624661	39433.3	390.666	817515	73770.1	23352.5
332280	31327.7	56.0552	1.21305e+06	79572.5	1332.72	370341	32568.9	5973.68
792086	53960.2	194.112	1285735	60345.7	819.666	301651	25862.9	5704.48
251607	21821.9	54.6992	567347	64810.4	561.394	825328	44713	9938.22
919970	44306.4	106.383	1.25279e+06	60407.9	739.519	1.5025e+06	78635	22470.4
369627	28977.9	63.9089	328256	29474.3	287.265	858846	69166.7	16448
1.00796e+06	52047.1	262.98	395829	37466.6	470.715	852888	35566	10647.8
1.2552e+06	57335.9	138.374	1.01416e+06	57047.4	653.847	1.11402e+06	66987.2	16508.3
742449	34632	94.5517	345956	32191.2	336.995	693594	38423.6	8169.76
892341	45532.8	235.054	623558	33253	368.47	219537	21736.2	4865.33
1.17862e+06	52708.6	213.341	698454	38022.8	536.759	359668	32962.1	6504.02
344245	36449.8	115.76	1.0279e+06	45071.4	570.614	645367	71274.1	22938.8
334084	26883.3	15.6706	646921	64010.6	668	207163	21916.2	3356.75
1.08312e+06	60033.2	187.471	170531	19960.4	117.162	713504	38164.8	7969.75
644956	35021.8	89.5913	1033392	54495.8	515.424	335804	29933.6	6847.28
971622	44582.2	211.813	1.32825e+06	104275	1234.09	331794	24679.9	5938.94
336209	32888.1	15.136	283430	23885.7	271.782	826493	50285.5	10363.2
978035	48849.4	205.772	338168	32883.1	366.339	670740	36639	8896.45
549734	49883.5	46.0501	1.17849e+06	80357.9	942.934	628666	37580.5	7896.68
1.11983e+06	42180.2	242.734	308304	25841	347.409	1.12431e+06	73315.8	15233.1
363553	32311.9	94.0336	2159669	60931.7	802.581	5630249	133499	29642.8
389454	36066.6	170.437	1.75136e+06	80997	1051.02	206530	23359.5	3533.53
1.37982e+06	68099.1	148.956	1.78944e+06	65249.3	711.663	273953	25114.9	4932.82
365823	38612.6	146.68	890158	47480.4	405.585	855093	55643.7	12593.5
1.54585e+06	76873.8	226.856	851906	46693.7	372.163	216846	21168.2	3552.24
785332	39291.4	142.197	5314139	108507	1337.52	760503	42757.4	8634.66
356690	30160.8	71.582	387248	34705.4	296.609	364067	30529.3	5963.65
343483	31661.5	114.505	5725277	148392	2368.28	1.12278e+06	48357.1	11429.1
388331	29687.7	169.924	340178	27388.8	143.741	959842	49892.2	9763.63
1.14451e+06	54927.4	221.555	5.03624e+06	118595	1440.52	359440	31831	6933.34
358386	29702.4	61.498	4538797	152748	1651.05	949001	49780.1	10512.9
1.09182e+06	44474.4	123.945	307800	26537.3	58.1327	3.04608e+06	87137.8	15541.4
375151	33289.7	145.284	333098	26143.6	112.513	315247	27428.2	5487.17
349402	32781.7	153.947	1.70132e+06	85583.7	1162.08	1.26466e+06	59176.1	14648.7
301540	30346.7	84.405	807818	42676.2	450.973	1035440	47746.2	8347.67
1.97242e+06	104294	420.257	826785	48619.5	541.39	1.03589e+06	46195.1	10249.6
1.00008e+06	50148.4	160.035	277207	25185.7	354.247	892204	44207.8	12141.9
929132	53721.9	100.84	927328	50944.9	690.884	2.98265e+06	73517.9	18261
338424	32464	186.01	2.71555e+06	92427	1024.69	956542	61933.1	11471.2
358148	32322.8	89.8134	993821	57247.5	571.921	244616	22823.7	4205.29
638426	41152.6	202.495	1.0657e+06	42637.9	532.747	788030	43164.6	12620
312134	30466.6	158.935	219790	19477.2	100.47	2264005	56054.2	15795
1.25416e+06	53392	158.495	1.1704e+06	80462.8	1073.19	329253	29262.9	5772.96
863592	46196.8	151.379	752044	45660.3	468.058	325764	27328.9	5369.34
843359	43272.2	86.6105	842695	38999	585.38	385257	31930.6	6969.42
1.16154e+06	72521	214.65	1191689	139742	2001.23	393116	38092.2	7456.21
400465	37666	63.9089	638922	32209.4	259.658	910260	43740.2	10739.3
1.06723e+06	49775.6	129.617	1.75995e+06	93248	1163.35	1.59357e+06	80313.9	35196.7
720078	45677.5	136.462	321727	33155.7	324.205	669558	63550.6	15104.8
680530	39146.5	140.066	317840	32368	199.653	887916	44414.2	8835.31
980036	47198.1	160.841	762195	65617	689.603	1.10885e+06	59955.6	12829.8
308999	26963.6	73.7736	1.17535e+06	65748.1	1143.44	334551	26954.5	5462.82
916452	86805.5	204.826	1.36618e+06	83021.9	1249.76	891618	43444.2	8891.22
961478	44132.5	117.457	736600	49435.5	621.417	1.27149e+06	93702.3	34525.5
1.27058e+06	79464.5	262.908	977534	37408.8	471.693	330339	30480.9	4824.1
4.71669e+06	109611	518.962	270025	21396.8	116.645	9743.3	6770.54	-26.3338
1.05745e+06	59947.6	198.122	262410	25723.6	261.247	1.14945e+06	64264.7	12875
272466	20736.3	4.13563	565706	32834.9	449.29	798157	43769.3	10115.9
293195	23638	143.961	842274	43321.4	521.181	298402	28954.6	5942.75
1.54128e+06	69141.4	291.579	1.74483e+06	71202.5	1192.93	329707	30910.6	4949.7
1.33292e+06	74808.2	322.345	925279	103753	1244.82	929699	40928.6	15639
1.20157e+06	80750.1	274.953	858257	57626.4	425.962	323514	33158.2	5971.7
5.81505e+06	143598	462.392	5598440	144387	1337.52	1.00529e+06	60121	16536.8
267760	36272.7	71.4199	276050	27462.4	228.525	285218	18833.4	6012.79
699472	41091.5	100.84	1.08245e+06	58985.6	715.957	1282001	50367.6	16020.5
841729	35139.9	140.139	828381	51725	420.046	995938	55891	8823.16
277807	23332.3	67.1325	815458	44272.8	580.508	326782	27260.8	7436.3
272121	22090.7	66.487	704990	48428.2	437.848	354052	26263.7	5476.23
1.08391e+06	42220.2	270.267	331063	31470.8	293.089	296347	27174.4	5096.83
1.03452e+06	50541.7	162.747	396626	36322.8	337.923	840980	37273.1	10392.1
1.30696e+06	63744.4	178.849	360138	61993.9	429.34	334914	27862.4	8093.8
305734	27279.3	121.586	968424	49157.8	684.48	732858	59027.7	12101.1
581180	30851.6	80.8673	1.19318e+06	65705.4	797.356	316851	29045.2	5062.16
1.06928e+06	50196.2	194.841	356472	31372.5	319.912	354969	34884.2	6632.38
1.4503e+06	72705.3	186.959	927539	43574.9	611.797	1.12223e+06	43496.9	13667.5
878290	58682.3	139.919	977244	72740.5	920.412	1.19959e+06	58254.1	14497.4
244966	23284.9	-9.531	1.14462e+06	58055.9	546.017	2.4494e+06	60872.1	14250.8
773449	57588.8	188.42	1.02754e+06	47862.1	384.858	363992	31765.2	9029.53
320246	27217.9	166.117	4203615	86633.2	1071.21	369828	35292.4	6205.39
713828	47308.2	233.023	284876	27076.2	85.9613	390903	33174.6	7493.62
859667	59826.2	131.532	1.234e+06	88052.3	947.381	855824	38326.6	9441.83
275958	23945.1	73.0425	591939	38873.6	212.104	379012	39701.4	8613.69
627147	38588.5	29.3749	1.30977e+06	61154.6	787.608	715421	35984.1	7663.77
642048	35223.1	87.1468	883417	50544.6	538.556	1.00578e+06	58623.8	13559.9
271306	26387.4	12.4678	720494	57425.6	518.962	803756	52285.4	11971.2
327769	32698	107.491	1.5775e+06	106184	1614.41	830450	60255	17422.5
959042	55630.3	100.914	1.2612e+06	77589.2	861.532	851899	51497.8	9926.92
927244	54500.6	162.014	1.4288e+06	67099.2	660.014	1.02103e+06	53875.5	10066.9
1564242	90444	331.282	304008	26823.1	286.977	1.25157e+06	90749.6	22961.7
842064	44370.3	185.353	323327	28401	466.52	1.27147e+06	69537	22856.1
907888	36288.5	151.746	344472	48691	493.597	317557	31932.4	4833.42
769037	49640	137.933	1.12825e+06	56731.6	683.806	324498	26168.6	9046.75
230675	18543.9	-2.2592	5.47854e+06	103763	1652.18	224989	16733.6	2935.2
1.22585e+06	55190.4	152.553	1234535	68454	646.86	709266	41203.5	8290.56
809460	34120.4	101.727	383378	36940	197.32	842754	43722.4	10962.8
605372	31397.6	84.7756	273693	27558.8	185.207	707261	38925.7	6776.96
308103	24047.2	110.593	978667	43606.1	286.258	121232	15995.5	2269.72
310427	24981.5	81.522	274028	23398.3	248.887	245284	24281.9	5200.96
299271	24837.3	79.8042	2.96126e+06	75217.4	751.996	1.16586e+06	54993.5	9848.98
946122	46230	197.466	1.04312e+06	48800.8	573.983	947246	43767.4	11243
904209	38908.1	157.835	328118	26809.8	262.763	1.96359e+06	56591.6	16409.5
1143021	79705.1	249.682	736635	43746.9	418.073	265475	23947.2	6062.28
884324	41899.5	164.652	638642	41947.2	501.739	1.09089e+06	59309.5	14853.8
610290	35891.8	98.473	828423	48585.4	554.158	309314	31701.8	5261.82
239991	20588.7	64.4723	1.40106e+06	87508	1215.73	1.32437e+06	75559.6	16979.6
588287	34711.1	160.695	753453	34884.1	616.575	771740	42232.5	10157.6
278101	26385.5	120.628	1190032	60518.7	670.435	894020	37952.7	11265.6
1103916	53612.6	213.268	359410	28550.3	325.134	1.15752e+06	49571.3	18370.5
382801	37166.3	85.295	819105	42135.5	556.985	1.02503e+06	52726.4	12413.7
896884	48113.5	201.038	237776	23020.9	209.485	736018	34277.8	10369
844123	49161.4	139.477	246330	26576	219.884	2.03207e+06	66387.9	14565.9
842824	52670.6	115.981	1.37662e+06	64227.1	664.482	329429	35244.2	6188.8
1.27624e+06	62948.8	167.435	247310	21035.6	174.388	849784	64220.9	26396
785526	42091.1	90.4059	1.27617e+06	77616.2	1068.11	1.27681e+06	48738.9	14851.6
268996	22524	7.83722	312934	27004.5	374.718	5494867	102423	27799.4
1.31244e+06	55424.5	146.312	1.16215e+06	62572.8	909.187	369735	34544.7	7222.8
402766	35672.7	139.404	6068777	147363	1991.2	320230	27235.9	5344.84
1.15468e+06	53929.2	110.445	889050	45786.3	369.748	837942	47980.2	8035.83
970873	58203.8	143.006	834546	44412.3	580.233	373199	33448.2	6726.34
3.56899e+06	92417.9	318.838	1.85316e+06	84967.2	1114	986902	41357.4	10552.5
726431	36659	128.881	415218	45115.5	368.186	618972	47743.2	14031.5
851758	41029	100.692	294902	26590.1	430.325	272690	22639.7	5089.41
687037	48767.2	240.054	347374	35882	460.642	992367	45802.4	12600.6
651254	42225.1	159.155	1.23987e+06	63356.5	993.342	240109	21092.5	3424.66
594979	32924.1	185.28	658876	60111.3	521.735	1.22716e+06	62407	17709
1.04366e+06	53878.8	142.491	312274	24186.9	305.725	799961	82020.3	26852.5
551399	40397.6	6.55117	1.00065e+06	60286.6	910.175	772256	45539.5	9918.88
733172	35682.7	165.604	375943	34384.8	277.115	1.33703e+06	57742.4	15892.1
1.92436e+06	121234	408.056	1.21832e+06	61828.5	733.504	232971	23532.3	4117.32
1.01544e+06	47151	88.7765	343029	27961.3	334.353	748286	38515.1	10130
1.01836e+06	40443.8	108.747	405540	32315	377.414	251496	22761.5	4378.26
387655	33418.4	119.891	362229	36254.4	522.498	832006	47356	10714.5
740735	41404.2	90.3318	310022	33177.2	332.568	938103	40347.6	9426.09
222359	14969.4	145.725	667907	44303.3	347.694	970929	68468.2	16299.2
286839	23612.3	50.8808	635666	37184.1	348.264	877062	43699.9	17521.6
649065	44141.9	192.653	782889	37175.8	480.353	1.14744e+06	49517.8	14660.9
288750	28503.4	38.1057	669590	42543.8	259.658	1.4014e+06	76263.2	17818.8
1.21468e+06	48989.9	263.196	728207	39775.2	435.248	942106	43608.4	11683.8
965662	55870	159.082	787314	40990	439.393	1.18173e+06	45708.8	11607.4
667503	34269.9	13.9915	275648	24927	277.547	364587	38116.2	7666.24
1.43733e+06	56327.3	245.051	246339	18058.5	194.403	260034	27151.6	4110.69
2.42028e+06	128047	417.227	394081	31553.4	504.451	298847	23367.8	4263.25
1308821	82738.4	252.286	1.132e+06	46608	562.702	343267	31678.9	6238.78
592273	51566.1	127.482	1219968	89044.9	1246.58	997645	52147.7	12727.2
908780	45355.8	237.083	1.001e+06	47569.4	595.454	870359	44107.5	10917.2
709734	33967.6	71.501	257499	25195.7	147.928	639455	67314.5	12042.5
1.04691e+06	51280.5	115.612	4116320	97446.4	1326.22	932590	48079.8	10518.3
266256	22217.1	19.1152	833699	40719	473.859	1.49695e+06	91585.2	27151.7
1.19204e+06	78446.4	334.568	875276	74547.2	527.763	374636	31775.6	5250.8
898174	39686.5	224.315	1.00595e+06	52947	421.596	740657	42244.7	6948.24
677509	37901.2	68.5866	1513731	110421	1523.69	701777	41828.3	7844.3
1.20466e+06	55925.6	131.09	249859	21466.9	227.8	294127	24159.5	5221.58
256714	22278.7	21.5729	786946	39920.6	591.618	702865	30085.8	7150.02
282460	23749.4	59.7338	298749	27493.2	250.406	720147	36527.7	10214.3
1.12833e+06	82518.5	240.851	968750	45625.4	574.739	322439	31409.4	5397.51
269782	20758.3	50.4046	663573	38957.1	533.162	263447	25195.4	4655.08
895107	56593.3	206.573	1.07908e+06	83077.2	1309.84	1.05895e+06	45153.4	10933.5
780157	43607.7	176.656	1.0931e+06	47442.6	634.493	834822	41394.9	8692.84
800324	40719	129.617	351662	34236.4	381.102	372030	27809.2	5099.01
622646	34570.9	83.7349	1.23154e+06	62762.4	830.185	535602	29925.7	6734.39
815916	42875.1	210.504	296496	23615	206.646	1.27105e+06	56503.8	9498.95
310649	24889.5	67.6977	1.64832e+06	87889.6	992.212	1.24006e+06	59060.1	14143.6
207954	18874.1	97.9553	1.38277e+06	56423.8	998.355	799568	42598	11620.9
878486	41186.2	157.982	889601	38907.6	359.015	1.06435e+06	49323	11965.3
832106	48061.5	181.335	328298	28908.8	238.388	2.64993e+06	96527.2	21209.2
807107	40244.4	105.053	904444	45903.2	394.204	276788	27469.3	5061.24
324009	26443.8	24.0375	1636416	123142	1886.71	324180	30419	5704.13
1.30938e+06	71659.5	321.486	3.10089e+06	79470.1	780.119	587438	33314.7	7719.54
375879	30580.1	198.778	914499	41124.4	467.219	400630	38232.2	6625.6
283369	22750.3	48.7396	747418	69053.1	656.22	598706	36520.8	6513.13
974999	50558.3	124.387	245168	21434.6	187.398	997179	42940.2	13704.7
352993	33531.8	60.6957	1.05148e+06	53056	593.057	340651	31705.1	6768.99
1.06511e+06	54825.6	112.513	896126	53916.4	617.394	298552	28209.1	5395.68
1.156e+06	66776	150.571	897982	48840.6	397.175	394573	33686.9	7856.86
670838	34525.9	154.828	979000	47842.4	603.939	853562	54461.1	9081.63
762638	39726.5	155.195	855209	41963.1	487.606	378398	43753.3	9597.01
345140	30043.1	101.283	404481	34528.7	380.251	637242	35217.5	6294.91
945207	52104.8	237.88	280011	26488.9	240.127	1.0974e+06	51811.3	11838.4
242519	22441.1	6.8536	858165	36345.4	515.633	726990	45625.6	10199.9
1496422	57246.2	282.444	600677	44155.9	449.501	303293	32856.4	5333.48
1279259	76166.5	209.048	246213	23012.5	133.96	721387	36643.9	7864.35
296309	21899.3	114.948	699705	42522.4	463.721	1.20168e+06	54778.1	11973.5
382506	34131.7	117.678	1.0704e+06	55918.4	516.534	1.14948e+06	58992.7	12850.6
1.9414e+06	115869	340.207	659473	38138.8	567.932	967589	68875.4	15126.4
1.21397e+06	64282	244.906	645196	39728.7	459.031	372473	33151.1	7671.11
661399	37606.3	116.424	249358	19610.2	197.539	270145	23829.1	3956.92
1.19783e+06	84114.4	358.233	861317	44599.9	459.241	1187675	54967.7	16781.7
619980	42753.9	117.309	993965	59223.3	517.575	785651	52435.9	13159.4
254264	21205.4	70.4476	216664	22335.2	99.3606	281700	22217.5	5045.99
221419	13451	59.4134	248082	23208.7	193.09	698332	36887.7	12364.2
244642	19649.7	78.9055	362059	33410.1	472.951	371899	32598	8290.35
1.0153e+06	52645.3	169.412	1.3164e+06	74473.7	1154.73	356669	29171.9	5127.11
351330	36572.7	157.322	1.4473e+06	83029.9	895.985	1.07224e+06	39152.9	15135.2
261998	23484.8	296.322	1.16363e+06	77613.4	1095.08	394503	34455.9	7169.64
1.2851e+06	51035.7	164.945	330825	37626.5	484.538	1.82472e+06	98687.6	25738.1
783620	45887.3	194.403	1.56836e+06	103313	1488.6	210915	18784.3	3219.71
1.02092e+06	75143.4	119.227	269986	25724	212.686	235279	21969	3428.69
976052	70021.2	209.267	754726	51042.6	493.876	5454444	110489	26848.7
256066	28105.7	95.7357	604617	38503.2	313.61	307060	25590.6	5909.57
338470	30257.7	53.3452	658069	30707.9	316.117	762314	44173.2	7983.45
1.34012e+06	52448.9	290.573	325114	41809.7	312.177	1.40141e+06	64956	13225.5
1086216	70048.5	267.31	729829	35428.8	424.272	837594	50755.5	11681.1
342946	33277.7	76.9474	1.23535e+06	59455.5	704.879	355004	35873.2	7338.66
1064576	47360.4	133.004	298656	23923	294.454	203555	17713.7	3793.27
280032	22350.3	59.4134	606228	56771.6	618.144	636571	40947.3	10655
705402	41981.7	113.546	1.06296e+06	52391.5	568.139	951824	59932.2	12463.2
886807	62432.3	239.547	1.05711e+06	45790	483.771	4.38896e+06	87258.4	32655.8
1.00063e+06	63771.3	122.987	860818	56477.2	748.329	826664	43450.9	9120.81
674140	36938.7	67.1325	924240	44506.8	629.388	949158	56745.8	9838.6
692972	43084.3	159.008	805326	42405.6	548.088	248139	26140.5	4826.99
1.03473e+06	51894.8	133.813	335796	28438.7	419.2	758557	42088.7	8080.38
292065	29094.7	82.9968	1.1371e+06	69697.1	617.871	1.02929e+06	56544.3	12113.5
369056	35496.1	100.026	223667	20308.9	127.408	2.26452e+06	65613.6	15190
302497	28300.7	34.7438	576810	35421	416.592	736484	35645.1	10103.7
335537	26453.8	144.255	1.03832e+06	46866.7	612.684	697766	42177.9	8443.27
960161	51174.4	207.374	297924	26243.3	280.212	324088	28654.4	5829.65
1555885	86513.7	355.101	967197	51189.5	564.285	668519	56718.5	11505.8
384377	36901.7	121.365	832535	46045.4	386.559	244698	42758.1	5064.99
392016	34308.5	105.94	5726495	125794	1590.05	333318	27517.6	6377.58
901274	46197.5	83.5155	389826	37301.9	282.012	395170	37983.4	8061.11
1044258	57369.4	167.874	1.1399e+06	62449.9	752.13	263052	23771.5	4017
728835	37459.8	169.851	742957	58215.3	662.993	331143	27794.5	6290.18
1.18421e+06	59910	261.319	317134	32489.7	374.86	207256	21285.9	2988.36
1.97413e+06	100548	280.716	1.18181e+06	47702	677.664	863463	44486.6	9758.97
339763	28123.8	6.70237	349468	32522.2	162.307	581632	35640.3	9770.4
1.18281e+06	53529.1	200.892	230862	26560.7	113.251	785744	39615.8	8205.63
557339	33419.9	106.457	259791	25722.3	234.329	983261	47697.3	8286.32
792728	39806.1	138.227	963913	52831.3	641.155	945826	47861.4	10164.4
1.12043e+06	61990.4	203.733	270370	21630.4	243.386	594897	35319.4	8504.26
1.32713e+06	64550.9	200.017	853899	50985.6	722.929	1319835	93632.7	21275.8
674338	36523.7	110.076	1.14836e+06	59784.8	684.075	325568	28812.1	5497.34
651813	39686.3	89.1469	979420	55723.8	466.38	945303	51209.3	9536.79
899271	41634	72.5555	1.23859e+06	55215.4	683.131	440020	76830.8	20663.8
802478	41444.9	187.325	996166	46741.4	595.454	875108	43300.7	8842.79
1.229e+06	60043.2	225.477	1.73592e+06	78033.6	1034.43	362074	44282.6	9990.46
1.89284e+06	147514	505.911	1.40428e+06	68446.8	669.623	791986	41364.5	7496.24
984686	50629.6	189.223	4.25435e+06	116600	1555.95	981147	56020.4	14536.5
302930	27993.5	144.182	673567	39205.4	337.281	931267	47194.4	9919.16
559719	36726.4	81.6039	1.22261e+06	62644.2	577.693	251694	24083.9	3973.51
1.18217e+06	51716.3	89.5913	373023	31531.8	266.372	969885	46397.2	12903.6
694886	40085.8	104.684	754679	43558.9	545.05	297840	29035.4	5281.44
370823	33358.4	56.694	240226	20589.5	187.836	1.10952e+06	65602.1	16198.5
823506	42308.3	119.743	1662694	88165.3	1253.5	327459	25808.1	5704.69
237621	22590.6	87.9617	533500	32560.5	344.201	825512	43804.1	6519.56
2.14671e+06	113674	253.443	1280567	57456	634.22	825525	44396	8641.51
773440	48303.7	48.9773	1.035e+06	55768.3	723.197	668811	28122.1	9448.19
508033	33174.4	49.77	754069	41687.1	556.916	1.00269e+06	46191.3	12612.8
769676	40378.9	160.841	299681	26660.7	250.189	399068	36876.6	6804.29
815388	39426.4	127.261	916623	61210.4	756.26	378888	33366.7	8420.39
1083986	50798.2	262.619	312102	31127.3	331.639	1.00236e+06	37775.2	16493.6
327562	27118.4	119.153	408103	36322.3	393.426	248317	24248.9	4161.09
1.95683e+06	106196	410.456	373901	31081.3	515.633	313235	28803.3	5260.97
839950	36214.5	245.63	364807	33857	342.133	319524	25142.2	5806.71
1127212	66459.9	341.063	1153114	60762.1	843.952	380759	31467.4	6683.49
1074184	52200.4	153.874	6347636	172657	2204.06	221639	21037.6	3574.48
900907	47802	195.789	892419	50247.1	334.568	311635	29094.4	5622.23
266328	22311.1	68.2633	918329	38864.4	349.333	793031	42026.8	11624.8
276886	23220.2	46.3662	1.06745e+06	56381.4	552.917	1.76343e+06	86554.2	25910.7
501362	32634.3	60.6155	820216	49967.9	531.155	321759	28034.3	7444.84
274174	21227.4	42.7383	1266070	61263.9	722.594	924016	43697.6	11577.6
831254	51752.5	112.513	281268	20208.9	182.285	355563	38269.9	6352.87
1.35658e+06	81357.8	262.619	325043	28270	294.31	369168	37257.1	6177.22
1.4119e+06	63400.9	228.09	2.38054e+06	124793	1737.68	185380	20077.9	2367.43
280563	24481.9	28.5994	1.24319e+06	52533.9	980.846	1.01456e+06	58704.7	20419.6
1.18273e+06	54479.4	241.141	256864	24994.5	229.033	4.09043e+06	91297.5	25065.8
674727	42277	150.131	5081127	119705	1721.72	344010	34471.9	5757.99
578729	33251	181.992	367798	35457.8	340.777	3.57461e+06	90032.5	18173.3
541281	35054.2	104.166	1644474	93089.9	1107.64	756765	39331.9	8023.9
316603	28977.7	109.633	1.05903e+06	49705.9	483.143	515357	38537.8	11978.1
932383	66639	224.17	831324	63728.5	1082.44	1.06639e+06	66500.6	16083
1.1201e+06	60703.2	227.945	599313	35805.9	336.495	640234	48411.1	9889.79
329962	35763.7	76.6215	788147	34698.9	282.732	265511	22346.5	6402.71
360771	28620.6	148.883	608600	34768.1	234.909	1.05522e+06	49732.7	10468.3
293962	27242.5	163.846	1.49367e+06	129133	1820.35	293038	24607.2	5893.33
283015	23374.3	74.5864	301646	29715.1	301.133	276550	26759.5	5452.93
1.00253e+06	49594.2	130.133	586530	33020.6	249.538	1168150	60508	12292.4
1.45406e+06	86038.6	249.827	373387	36817.6	259.658	990474	64208.6	19813.6
366128	26336.1	151.012	349690	35418.8	298.333	795064	43294.6	9408.72
805503	48170.5	190.099	1.01862e+06	52326.5	659.54	320786	28969.7	5227.36
973871	52520.9	146.753	626611	33852.8	551.952	4.61173e+06	142268	32954.5
298898	26530.4	129.028	1.22998e+06	63252.9	866.403	212324	18236.6	2880.62
668231	39959.6	188.785	342026	31195.3	308.952	617566	31997	10254.3
282396	20822.3	54.6992	876466	43024.2	474.488	349109	30743.3	5966.34
283496	25313	52.0725	645886	41763.3	398.943	1.31773e+06	68344.7	15704
1.08677e+06	66729.5	131.973	783567	45807.7	508.482	989770	50513.6	12324.4
357269	35570.1	38.5757	2.54822e+06	73013.1	718.036	279766	26524.4	4357.43
742374	35722.7	197.175	284854	24136.4	218.721	1.0324e+06	51479.2	12157.2
2.92614e+06	75810.9	138.963	259882	26832.2	217.994	690586	38409	7614.14
267312	24707.7	23.4207	128604	15465.6	158.495	232647	18004.6	3732.27
541749	33555.3	57.9728	1237554	66360.2	864.497	909258	45324.3	11299.1
989586	53633.1	144.623	975749	43840.4	558.914	349973	22274.2	10667.7
333695	29224.4	101.875	620755	40217.9	402.83	683341	38331.2	6448.6
652147	52663.8	199.216	616223	34580.3	542.495	859736	87877.8	21004.8
793854	41170.3	143.594	221104	20562.5	159.522	1.93897e+06	177895	52781.3
580899	41655.5	145.063	722185	47083	500.209	792249	44071.9	9286.16
1.13091e+06	61567.5	194.768	312458	23637	405.938	896316	47133.9	12241.1
195109	8085.11	38.4974	367920	32915.1	347.195	362128	45483.3	8428.3
1.60847e+06	86806.8	203.078	376199	49594.3	468.128	829170	46739.1	9475.58
277439	23721.5	34.978	1.22162e+06	64027	754.195	976090	52460.8	9478.61
366030	37854.2	50.9602	952046	45371.8	635.037	968748	52007.3	12185.3
919039	49936.3	161.134	770546	42989	398.518	1.17838e+06	53499.2	13097
921060	38688	153.874	1.14303e+06	54421.8	716.762	1224574	50210.6	11804.9
354653	33911.7	99.8043	5383792	143300	1975.53	1.00429e+06	47268	10550.3
1.15831e+06	49320.4	202.713	314981	26063.9	200.819	270463	23134	4677.39
1.7743e+06	53174.7	239.547	257759	24584.8	121.66	299424	27935.2	5419.54
968621	40318	174.169	1.48982e+06	79625.4	854.754	865074	51495.9	8235.56
1.01317e+06	61437.6	201.766	222627	19439.1	96.9935	745016	41383.7	7773.7
1.83852e+06	75294.4	281.076	385504	35152.8	309.669	822817	49479.8	11328.1
931682	39017.7	106.752	1863625	82650.3	1171.68	373313	32705.1	7023.99
1.10166e+06	45081.5	190.974	578554	35185.5	443.326	2642389	67468.5	14693.8
1.50689e+06	84250.5	262.186	1.64355e+06	65679.1	931.355	1.10121e+06	47617.7	13641.5
1.41796e+06	65418.8	285.682	990091	49087.5	409.962	525049	44356.4	9182.52
1.11648e+06	53304.3	234.329	354529	31795.1	377.698	533700	41110.2	9516.46
307567	23991.2	45.9712	1.10782e+06	118979	1412.71	883864	39179.6	9494.15
971608	46874.9	111.553	285695	20843.4	227.146	931464	58348.2	14592.4
1.05435e+06	46946.6	179.215	1084898	48630.3	705.484	344953	33698.1	6645.58
1.56754e+06	73074.2	206.865	338549	27743.3	250.116	283108	26348.5	3949.08
1.20837e+06	57224	183.746	596678	40311.7	294.095	741445	36471.4	9924.31
890737	36242.6	78.334	777479	41398.9	340.421	828515	37362.9	8172.8
255165	21540.5	56.5342	2.04914e+06	58285.8	699.702	982646	50321	7577.43
334525	31434.2	111.774	1.05895e+06	44390.3	606.468	806479	44088.2	7883.12
1.09625e+06	69110.7	194.039	954111	50492.5	458.681	577086	32576.7	6517.93
888683	41701.9	194.622	9122111	163527	2469.87	361392	29836.6	6640
338247	27507.1	88.1839	1.19771e+06	65046	1018.76	389440	31801.3	5624.7
1.23556e+06	55579.5	277.187	4.15217e+06	113522	1331.16	908403	57096.5	14414.3
1.109e+06	43589	179.873	275405	23339.8	65.036	305970	26996.7	4586.74
832496	43036.4	108.599	739191	45490.3	468.967	1.05538e+06	51066.1	13486.4
924560	44199	125.787	652850	38256.7	263.124	956734	52603.9	10738.8
370140	38219	140.948	307708	30730.8	189.807	725360	39145.6	7872.82
931108	45491.2	207.301	1.21504e+06	60062.7	462.322	1.18821e+06	54768.9	12135.5
984364	48754.4	109.855	866095	43261.3	407.491	5.50537e+06	94912.1	19075.6
872790	51904.3	163.846	1.23463e+06	65249.7	822.561	975399	53307.3	13247
1.01835e+06	65728.2	259.802	1.1273e+06	84227.1	677.192	405221	34633.4	6843.26
1.66654e+06	67978.2	208.757	271857	25344.8	295.101	292468	27683.7	4786.33
982994	38746.9	154.828	398233	39600.3	357.165	321202	28679.1	6556.83
585867	39349.7	117.826	1.52555e+06	85028.8	1172.03	267716	21072.5	5385.65
937742	69060.9	241.286	1.022e+06	53525.4	738.651	1.09611e+06	50599.2	18410.4
1.08168e+06	49256.3	124.387	2.58588e+06	71332.6	689.536	372370	36970.3	6059.53
872105	47198.3	166.263	778879	43488.9	432.365	951337	42123.8	9376.39
826357	54709.2	100.026	1.15813e+06	54748.9	890.478	858892	59482.2	14811.4
898000	52618.4	171.242	191559	19745.4	110.667	253782	18104.4	4867.38
630034	38344.5	124.313	240864	21892.2	196.81	250907	22789.6	4049.83
217052	20951.5	86.5282	1.31794e+06	99887.9	1261.34	347155	29861.7	6600.89
361571	30924.3	89.6653	803115	50726	464.981	804526	42802.2	8804.17
1.04112e+06	45458.1	245.485	1.80128e+06	102469	1515.36	5089326	142151	33470.2
942655	48583.4	130.574	917864	55813	992.424	928819	37174.2	11606.2
727512	35303.7	120.554	913264	53859.8	407.35	233304	24750.2	4730.48
253215	15672.6	134.328	216970	20056.3	57.1733	944062	46042.4	14682.8
276769	25591.4	65.5194	814465	37890.5	383.441	244875	19384.1	5196.8
329690	33130.5	91.2945	738217	35985.7	359.584	1.06861e+06	118858	34995.2
612560	33921.3	86.0347	759622	45516.3	579.135	369526	34273.5	8592.37
227268	19501.9	58.1327	1.62059e+06	130416	1587.37	340005	28606.8	7421.12
1.24172e+06	72957.3	256.696	903701	46301.4	547.674	954725	46238	10219
370616	29856	222.717	1.2914e+06	124821	1663.97	391439	37011.6	8763.93
299638	24682.6	69.3144	3.05243e+06	77179.5	1200.48	874222	42436.7	9035.25
4.75016e+06	135044	455.179	1.00752e+06	53521.3	610.158	340974	33207.1	6107.54
337024	28724.2	80.7855	3495666	125575	1690.02	341841	30869.7	6000.36
726653	40372.3	80.3765	323641	35281.6	231.283	640683	36714.3	6806.48
1084104	60533	196.445	319806	28897.8	297.83	737270	41011.6	7596.56
756478	35495.1	137.05	1.30214e+06	58248.3	720.047	291079	27031.8	4518.4
277389	24524.9	128.439	602244	42648.6	405.585	339074	34275.5	5831.98
1.1035e+06	87230.2	361.505	3.01697e+06	126903	1310.41	1.15689e+06	48608.5	13267.3
897376	51420.2	90.7021	1.133e+06	85468.5	830.397	517156	42680.9	9515.19
1.23096e+06	73655.7	255.539	954006	46589.1	596.275	207577	18912.2	2856.19
1.25673e+06	51244.2	184.842	1.05814e+06	59621.4	452.375	372607	33286.7	6758.54
239539	18204	35.7589	4.42938e+06	128383	1358.91	267852	25386.8	4409.11
352883	32184.3	84.7756	830338	42516.3	376.776	949404	40696.1	17240.2
280952	23360.5	21.8037	3.77835e+06	82557.1	910.387	328458	28953.8	5125.42
294847	23197.8	100.692	2.93766e+06	87184.6	588.602	833038	42216.3	10653
347703	37211.6	115.834	586983	44504.6	283.596	967122	55168.4	13250.8
579439	34581.2	106.014	958795	53286.4	439.534	379743	33997.4	6299.85
311066	28803.7	3.23158	1.26236e+06	96418.1	1283.37	320197	28127.5	5655.84
519754	36670.3	135.064	655304	40093.4	410.244	338640	34098.9	5652.38
863451	43715.5	160.035	1.31273e+06	96150.4	1020.81	121963	15293.5	2250.45
910123	45895.3	110.298	1.25611e+06	58501.6	577.349	617979	41179.7	7732.18
363185	31701.7	55.9754	199705	21808.8	120.112	779379	43511.8	9425.74
1.27954e+06	79326.1	257.491	295482	30244.6	400.498	874585	44991.5	7902.61
332352	27264.3	109.707	1.36023e+06	73225.8	1170.27	2.00654e+06	60944.8	12295.5
282519	24089	71.2578	1.78824e+06	99134.1	2095.27	792296	52207.7	13122.4
1.38652e+06	75623	213.123	313581	31490	360.438	966914	49400.4	8828.88
1.12882e+06	84751	156.148	1451171	122409	1774.04	217648	17851.2	3711.09
277307	25000.2	51.3573	964032	44918.7	555.951	1.31187e+06	109946	20391.8
553107	37096.6	134.034	560066	47029.5	454.618	355155	35400	6442.53
1.10716e+06	51127.9	263.124	628682	66229.3	552.021	320890	34621	11777.5
331841	24839.3	55.4169	692022	37225.2	446.484	1.04225e+06	52870.9	13171.5
1.0033e+06	58723.9	216.759	743761	43495.9	457.28	296126	28565.1	5044.09
362494	37903.7	84.1452	809365	46156.1	664.618	939019	50081.7	9618.33
982357	58806.2	207.957	343130	29082.5	461.412	340021	33873.1	6193.03
642958	40784.4	81.8496	873787	43514.7	561.807	1222749	59095.3	16059
2.07896e+06	183652	1180.71	1.04136e+06	58273.2	698.626	1192566	62609.8	17207.1
614443	39328	62.542	3.19847e+06	120579	1460.29	829950	50162.4	13024.6
228659	21199.1	32.4835	909248	42654.1	539.731	215256	20226.2	2711.6
542979	42772.1	25.6586	1.00266e+06	46611.5	397.175	1.34271e+06	69465.3	16870.1
294141	28144.2	143.52	285752	30145.6	205.627	825993	44446.1	8599.43
273793	23568.3	115.981	761241	44567.5	629.048	3.16045e+06	87241.7	20272.4
947840	48075.9	72.7178	2.73419e+06	123940	1207.9	361181	31635.3	5809.18
304616	28894.7	109.781	731632	47952.3	491.09	9485777	125571	28895.2
899813	63776.5	221.41	696014	42339.5	495.129	305029	25856.9	5205.83
822764	36182.7	179.361	1.36362e+06	66351.6	787.542	714171	50880.7	15061.2
814288	43282.4	109.633	1.11142e+06	49423.3	1007.74	1.35908e+06	61525.4	15524.7
1197899	65205.8	187.179	898145	48529.3	616.234	1.31597e+06	66854	19810.3
336368	29869.5	98.2511	655245	44590.5	344.058	541923	32680.6	7000.98
1.01067e+06	57117.4	278.196	1.31531e+06	70004.4	738.918	349743	28108.6	8612.42
1.01715e+06	55744.5	118.711	1.10316e+06	56114	566.143	208891	19713.8	3366.77
1.27247e+06	64139	139.183	395235	41496.8	436.302	4.15381e+06	90025.3	17613.9
1.91613e+06	68558.2	250.116	12474310	217655	2900.88	765586	44537.3	8917.84
1.36504e+06	62978	217.122	355822	37014.1	388.471	261402	24513.4	4978.36
349223	30401.3	-19.4856	408889	47631.1	552.641	263519	25695.5	3568.97
977891	41759.1	212.977	775646	43428.5	603.392	580443	35819.9	5397.58
1.12905e+06	51511.5	144.402	1.34525e+06	59366	732.902	5.91516e+06	121040	29904.6
693796	43149.7	80.4583	832245	50722.8	530.74	1.24685e+06	58450.5	21339.9
4.4724e+06	142910	443.677	931826	52656.4	503.2	228265	22091	3938.42
377596	38063	136.462	666135	45148.6	390.878	364710	28777.8	7023.99
655992	38178	15.0596	216790	22474.2	167.655	925970	59718.2	12829.9
292182	18879.7	93.6635	769939	38446.9	428.566	900826	50388.4	10515.3
390742	36111.8	133.004	1103425	57201.3	841.411	269952	24778.2	4429.94
913622	46557.8	123.65	301025	28362.2	287.409	285593	22118.5	4854.03
597915	38565.1	78.2524	328629	36284.5	396.256	985886	49563.1	12185
2520926	141854	630.614	411018	40863.6	464.211	379673	35022.9	6458.49
850443	45853.4	158.642	922090	51617.2	599.698	332645	48645.7	11330.1
929496	50400.9	215.377	1.81729e+06	78316.2	965.808	1.36677e+06	63050.3	13617.7
359678	30809.8	17.6592	986679	48033.4	438.691	10002312	178605	46213.8
265098	26661.1	61.177	670284	58930.4	601.682	579603	36050.9	8536.81
1.39455e+06	55550.1	247.15	4537696	100723	1163.98	1.04757e+06	46498.9	11672.2
1.10374e+06	50119	121.07	724755	39168	510.982	518276	31634.2	9437.67
942117	41695.4	125.492	1.30716e+06	84014.7	928.531	364931	34507.1	5985.19
1.33465e+06	59888.8	203.369	786876	70518.6	993.13	903233	86332.8	27254.8
1.18331e+06	59238.1	174.681	979365	44102.5	403.678	847271	44130.2	10317.1
1.04173e+06	58313.5	127.113	970910	72930	1005.98	892269	39903	10059.9
870987	39001.5	89.4431	380230	28065.3	470.016	1.23691e+06	52625.4	13166.5
1.23574e+06	87847	269.835	981328	50306	722.594	208237	19459.8	3167.05
878370	43174	220.683	1.08122e+06	56960.9	500.557	293451	27703.6	5850.27
1.01017e+06	46137.3	141.095	643280	34790.7	240.851	391924	30046	6675.86
1.15541e+06	49652.1	209.339	313957	31787.8	209.194	645448	45922	12761
1146441	57118.4	187.033	1.06892e+06	57747.2	595.385	240015	24974.6	3311.63
750245	38178.6	132.268	1.01599e+06	75349.1	784.495	699651	37404.7	11531.7
849706	44767.8	100.174	1.1163e+06	46139	582.086	835565	34255.4	11270.7
257144	24916	-22.0272	1.13286e+06	77308.2	1294.59	5.00058e+06	133145	33860.1
216954	18226.7	70.2046	931789	46969.1	461.272	346461	33360.1	6807.32
268012	25074.6	112.808	892475	58595.2	624.825	373568	61487.2	13881.6
1.19041e+06	61419.4	245.485	1.05072e+06	48388.1	545.327	888397	46510.6	12213.1
620777	32050.3	166.41	1.17852e+06	54905.8	542.633	991531	41083.1	8924.41
1.32629e+06	56765.8	209.048	1.00623e+06	43188.2	541.666	325337	30110.8	6776.82
774905	42043.1	97.6594	314232	29377.4	191.923	678497	59603.4	10608.9
1.50414e+06	70646.5	319.84	1.25732e+06	82539	1026.88	310393	30635.4	5884.44
344762	35289.5	131.973	4.03464e+06	91064.5	1086.46	849150	40562.3	11496.3
298353	23112.5	94.5517	691941	48885.3	413.208	560393	34019.6	13771.4
804511	39836.3	126.671	1.01064e+06	46766.5	543.876	643290	45347.9	6297.66
287508	28763.7	120.333	1.0287e+06	50355.9	832.727	4.08291e+06	106515	22573.6
645158	39919.1	108.378	1.15578e+06	74719.7	851.718	721087	39658.5	6466.04
7650202	136996	568.001	841062	37033.8	493.667	983363	49358.6	10785.3
559676	31042.7	73.7736	4019664	100586	996.801	716305	37106.6	7677.47
1.08922e+06	55339.7	186.302	898243	47024.2	500.627	361531	38204.1	9081.14
810975	47753.1	201.548	1.39492e+06	90313.4	1298.26	941735	48366.6	11118.5
629386	42622.7	180.238	316410	29808.1	260.669	226885	19834.2	3183.07
589885	40122.2	74.5864	714842	38639.2	491.16	717999	28011.3	8312.23
869110	43073.4	131.752	351126	32123	338.993	1.02126e+06	85053.5	16144.1
326886	28009.6	115.243	1.0888e+06	50007.9	638.437	305121	27712.1	5538.57
934234	50760.8	214.141	1.49739e+06	83553.2	1171.25	921348	60577.8	13694.3
336178	30889.7	156.148	954430	51182.6	618.349	952703	37387.1	10972.2
821713	47035.1	129.323	1189236	53033.1	593.81	384210	35672.5	8580.3
574674	38930	76.6215	833164	48843.5	575.357	358029	41403.6	10071.7
1.06958e+06	45407	151.599	330403	32719.6	368.044	842323	35721.7	7315.57
829806	41861.1	146.459	1.13499e+06	62753	704.812	996644	59709.3	11744.9
663872	37543.4	56.7739	338007	32435.5	249.682	702085	34479.9	7943.77
1.16529e+06	54671.4	321.272	852638	45399.9	590.864	210342	21151.7	2972.4
342240	30666.1	38.419	927896	61531	739.118	1.7544e+06	73710.9	15046.3
405446	35444.8	117.899	965538	77746.9	911.234	871683	44543.7	8135.87
1.10235e+06	59404	213.923	851112	66162.9	1007.74	3.0788e+06	79977.5	15941.4
1.09699e+06	67265.7	356.809	375658	29156.8	313.395	246915	23327.3	3601.8
1.15687e+06	46250.1	145.21	1.77977e+06	70611.6	842.117	1.04241e+06	54872.5	15310.7
723881	50268.1	193.236	291175	26671	189.369	298867	24328.8	5280.88
578486	30820	79.3139	744809	43921	512.162	328039	31430.3	5323.45
366491	31857.3	143.373	881375	44925.3	572.677	610135	35682	9283.83
297740	28016.2	86.9986	1.47444e+06	68364.7	801.31	988419	45936.1	15051.4
1.06903e+06	64643.8	237.736	1.08604e+06	57008.2	738.383	303016	30568.8	5309.47
960193	52107.4	147.267	745960	38841.1	336.567	1.0482e+06	46855.6	14703
683020	42219.1	131.9	287264	23323.4	263.557	694360	37260.2	7257.47
1.24338e+06	61431.5	222.863	1.14789e+06	55938.8	872.122	4449154	137924	32385.4
826289	49499.6	163.699	656958	34891.4	355.528	857226	49504.1	13097.1
803901	36752	100.766	778922	46221.4	445.642	989421	53331.1	10506.4
576688	26839.3	154.681	1.46196e+06	97164.8	1433.04	1.07179e+06	80457.9	18786.9
397449	30914.3	153.654	662822	38853.7	383.37	281514	27899.4	4747
905189	48071.1	159.742	1200766	53089.9	748.463	929904	94252.9	18734.6
1.1481e+06	61913.5	166.337	1.68834e+06	62664.5	548.985	1.06588e+06	61734.9	19875.2
295606	25800.1	112.513	270500	29186.6	226.566	957204	39761.5	12441.6
292393	19132.5	158.642	3555336	109398	1407.41	1.05043e+06	55242.1	16472.6
998620	68273.7	231.79	366350	39739.8	704.946	1.19388e+06	57701.5	12785
1.01321e+06	61141.4	191.923	2075243	125764	1779.97	688150	42927.4	10686.8
347330	50037.6	41.1654	371982	33086.4	392.647	329693	31326.8	8145.12
994935	57855	173.584	1.11214e+06	68665.6	876.711	350063	30073.3	5125.91
1.20663e+06	63708.6	108.673	1.15053e+06	64396.3	846	370858	36635.3	6493.65
1.05111e+06	51148.8	160.768	832961	46898.5	789.992	984575	41864.5	13508.2
910990	41327.6	113.472	3.04883e+06	137346	1698.85	820498	38089.2	8612.71
337558	27490.5	56.2947	309170	30547.2	312.106	887125	48913.4	10832.3
992908	41199.9	14.8306	614007	36645.4	354.318	11108895	184224	48056.7
349783	30474.5	116.498	348073	30556.6	289.998	330186	21874.4	6167.12
261834	19939.9	90.7021	329371	34034.6	344.843	332350	28572.5	6583.52
341310	35811.7	147.047	720817	42561.7	442.905	916600	60859.1	12031.6
646430	37210.3	99.3606	1148467	60515.6	770.694	863649	47357	13501.6
332808	28675.9	75.4	238050	21786.5	222.209	1.13855e+06	76048.6	16312.2
373336	30833	73.7736	381230	35378.3	336.781	1.67923e+06	70479.9	19948
303046	30362.6	81.4402	556092	39302.6	412.643	824831	52523.6	9952.34
566297	38985.8	129.985	394543	39775.5	304.362	1.0036e+06	42459.5	11138.4
704830	37495.4	118.121	273847	21241.9	106.679	11018162	139853	32007.6
595174	36899	111.848	237095	38454.6	372.305	877054	52762.5	11622.4
1.02721e+06	36208.9	149.176	296634	31302.1	302.712	1.12745e+06	63519.9	12585.9
969117	44294.5	201.985	1.19433e+06	52327.6	640.815	1.16314e+06	63981.8	17828.1
662928	39310.3	166.922	950771	50808.5	625.166	1.03084e+06	48920.3	12362.8
312857	26409.4	82.423	4.22042e+06	113740	1297.49	334817	30976.2	8362.92
294648	31491.7	53.5044	629817	36783.7	402.547	298096	28329.3	5104.45
1.41557e+06	93378.2	265.65	1.13182e+06	48117.7	478.747	319533	26683.4	5632.26
244696	23704.5	47.8687	683058	37645.9	337.566	713581	43669.9	8655.14
307757	29332.3	59.7338	311986	29092.4	295.244	786028	39554.5	10313
795501	44447	252.214	1.06296e+06	54442.1	681.309	808108	47883.2	10877.8
325528	26525.2	110.445	279016	27965.7	230.847	462412	39944.3	6638.73
1.16056e+06	58280.4	242.807	1.05483e+06	60365.7	722.46	382097	43822.8	6214.78
692012	34006.6	97.4374	290992	26862.4	270.484	765324	43766.3	8890.09
735859	41481.2	80.5401	1206718	63375.7	901.633	3.6421e+06	97752.2	22092.2
1.10609e+06	51580.8	189.661	369310	35234.2	419.976	1093529	53499.9	10922.7
688337	36329.9	124.461	247169	24180.2	140.727	1195707	59946.6	12912.6
334286	29233.1	7.3831	382444	34945.4	437.426	631403	31799.3	9662.03
283314	22916.7	146.753	274802	31398.7	331.282	1.11929e+06	44397.2	12740.6
915372	39981.5	158.935	339472	30836.6	249.465	3.53391e+06	109903	27001.2
400419	43923.7	217.776	295900	19742.2	241.938	789036	40004.2	6158.37
322784	25456.9	97.2895	290098	28532	265.145	1.17172e+06	63781.6	13331
761389	41976.3	139.404	888997	65126.8	816.701	562733	38131.6	9677.71
1.01676e+06	57978	201.985	327882	30590.5	250.55	823048	43310.5	8333.69
341048	28907.6	78.8238	919378	47673.2	399.791	780035	44088.7	10016.1
248539	25342.3	86.9396	1.12849e+06	55921.4	746.795	718261	43467.7	7661.58
1.03594e+06	47399.3	239.547	309529	26681.2	253.732	1.23343e+06	58933.5	20925.4
785708	61878.4	106.974	260111	21895.4	250.84	273122	24182.6	3859.49
1117644	60533.9	183.454	316622	29044.6	273.656	283367	26263.3	4066.35
318607	21398.8	69.2335	907869	45763.8	483.143	647162	37681.3	10003
372839	36218.6	147.855	893640	55855.2	413.842	1.24241e+06	76722.6	21053.9
236741	22008.8	83.5897	1178652	57126.1	594.084	954496	40636.6	8997.33
739697	33808.6	148.075	982562	45104.4	553.745	1.2325e+06	62088.2	19635.6
553933	36225.9	68.2633	601936	44831.8	437.356	354415	33425	6950.92
602185	36885.4	109.707	1.46101e+06	94064.9	1515.57	746576	42664.4	8258.36
2.71268e+06	81943.9	274.233	230011	17706.3	154.461	929190	47513.7	10391.2
629975	28728.1	108.082	284098	27751.5	314.398	807106	74416.2	17730.3
777740	39347.6	159.522	1.22285e+06	60497.6	730.026	350261	32849.5	6295.12
921422	51826.4	214.723	1.25211e+06	58260.8	751.263	302625	27576.2	5352.61
778268	33927	181.262	1114862	71770.8	770.495	836580	56311.6	13501.3
1254552	55707.8	259.441	1.28281e+06	65371.1	831.315	233077	18123.2	3596.22
327677	33322.2	121.365	836408	58916.1	572.952	4.13839e+06	97402	21379.8
717759	34798.5	113.398	615774	36394.9	294.741	1153067	55391	13238.9
1.0656e+06	47239	180.677	338058	36541.9	132.047	942090	58066.4	10838.2
1.20302e+06	77605.2	315.544	206415	22100.9	94.9957	1.06633e+06	57603.5	10835.8
689744	31913.1	126.745	1.70699e+06	79389.9	899.091	5.74174e+06	192700	41226.1
750589	40185.6	112.734	1.08638e+06	65647.8	646.792	2.48204e+06	76715	16070.9
1.31238e+06	79573.3	243.458	1210616	54669	803.781	858095	47494.3	8872.66
892797	41184.1	125.492	1.01183e+06	50992.6	591.549	324421	27368.9	5446.01
387192	40016.9	81.1946	355571	33063.9	308.952	280408	29375.8	4851.28
726120	40715.5	86.4059	1.1375e+06	60524.9	737.448	294373	25588	4102.64
1.17956e+06	55137.2	172.559	1020255	61693.9	670.435	1.13017e+06	66982.4	16509.3
1.23496e+06	63068.4	149.837	311589	32681.4	253.154	262965	25061.4	4454.44
1.48253e+06	84958.2	231.21	1.20307e+06	80618.4	1004.07	1.71295e+06	61048	11225
650697	36094.7	108.895	215171	20122.9	124.092	888838	51054	8320.07
361800	27100.2	75.5627	946677	42805.8	449.22	1.40484e+06	59200.9	22608.6
285909	20172.1	133.151	1.03325e+06	57479.1	592.92	1.27607e+06	72730	18820.3
251304	24675.6	43.0532	741518	46637.8	359.727	769428	36055.5	10718.4
256289	22448.2	95.7357	181235	17950.6	-54.0796	1.00747e+06	105256	23742.8
1.07242e+06	55549.7	123.65	1.51189e+06	79695.6	738.651	311393	28033.3	5796.19
4.31939e+06	273851	1686.49	1.17704e+06	61155.5	520.141	375679	39634.6	7925.2
316463	34378.8	48.8981	424711	59622.4	831.88	904035	43475.6	7565.14
1.20653e+06	68950.7	166.703	888667	58676.5	939.898	1.26203e+06	64670.4	12591.5
378667	30845	87.5159	2.81805e+06	77634.3	686.368	1.23663e+06	79173	17912.3
755329	36584	86.9245	301151	29805.3	173.803	329527	34254	5793.58
1.02217e+06	74896.1	253.298	981148	55739.4	656.491	956248	50055.2	9002.56
1.01604e+06	47189.9	112.586	268322	31450.1	367.973	289525	18630.9	6052.82
897318	39024.3	165.458	957971	64102.7	571.44	1.22806e+06	56353.6	17558
3.06617e+06	125868	418.425	1.99578e+06	97071.7	1317.61	1.23539e+06	48736	11634
1.07864e+06	55404.5	109.855	886948	53062.3	478.328	1.15682e+06	50884.1	12521.8
1.37402e+06	62741.6	237.663	666210	51125.9	495.965	714051	33733.4	9437.6
3.84199e+06	81005.3	335.639	1.01871e+06	44561.2	590.385	229968	23068.5	3921.26
230770	17651.4	93.8115	540379	36376.7	519.517	2.69459e+06	71806.5	16619.3
1002831	47871.1	158.788	345610	34035.1	339.85	247618	19849.9	3326.81
314937	25270.1	33.6519	796433	39795.5	634.56	1.12384e+06	64572.5	16303.2
1.43963e+06	64015.1	179.361	2.34344e+06	85756.7	886.877	254273	24348.7	4411.37
215654	20047.3	-32.4054	387496	37525.6	316.69	786140	41899.1	9220.5
1.08817e+06	52973	265.578	877104	45753	509.662	268797	22031.2	5014.51
774561	31894.7	87.5982	1.12172e+06	63146.1	797.709	242604	20420.6	3840.57
330140	28616.1	131.163	653679	37547.3	466.1	296045	28216	6292.79
270937	19033.8	121.07	278471	74802.9	745.795	335839	31312	6998.86
750253	42105.4	150.792	657980	32995.8	604.007	1.16912e+06	61072.5	12605.6
653636	41116	152.186	1.05519e+06	61088.9	537.727	283204	23710.5	4164.13
1.00327e+06	79130.7	258.791	659642	41925.3	476.094	317117	30103.3	5330.86
1.53996e+06	92870	163.846	908557	44721.8	435.81	1.39302e+06	54521	12217
329137	25399.8	146.386	743211	38276.2	516.326	320865	26556.8	7063.32
2.35545e+06	64283.3	209.631	195346	21033.1	125.05	935383	47330.3	15213.7
629007	36286.5	136.683	986973	48805.6	448.238	518610	39375.4	12317.9
360782	33321.1	108.895	1.05993e+06	58832.9	667.256	230539	24182.3	3936.23
988192	55148	68.6674	390698	30786.5	250.695	1.26216e+06	102977	22029
632770	47937.6	227.945	262386	22414.3	72.2309	324459	29960.9	6805.56
731116	38006	109.338	408458	67064.5	818.183	1.22347e+06	123759	24083.9
1.08214e+06	61974.8	173.364	732559	37046	385.567	767948	41407.6	9198.12
1.17482e+06	62490.5	188.785	292494	25630.6	191.996	830358	103755	31904.1
1949213	96569	278.988	336637	29468.7	344.201	697314	34665.4	7180.09
726343	50099.6	148.809	1.22405e+06	63134.3	969.056	912351	41053.5	14887.8
324383	26249.6	67.6977	349566	34013.9	356.382	1.05893e+06	48101.2	12523.2
669680	40051.5	109.559	1.29681e+06	116725	1920.04	838100	33007.1	13501.2
729241	42105.7	157.395	919676	48469.9	438.972	269133	22324.2	4031.33
695566	36269.1	166.63	1.18456e+06	49957.4	685.02	678275	43357.6	11825.8
265251	26964.9	126.819	792358	40794.3	333.925	650267	44227.5	11349.7
254131	22892.3	31.2388	1228525	84634.3	1057.73	726283	66170.8	11606.9
1.36064e+06	63583.2	164.945	738902	38907.2	347.836	807728	42123.8	11224.8
901002	48242.5	120.923	373908	35037.7	390.524	947846	47948	8738.94
868211	46428.3	193.747	5.77102e+06	115362	1419.62	216590	20595.6	3409.7
380076	31040	135.8	691985	40283.9	619.508	1.03525e+06	51314.3	15079.4
709306	37044.8	167.435	332106	27985	355.03	569607	35757.5	16050.8
23595.4	20003.3	84.3915	337548	33771.3	390.17	216115	23428.2	3870.72
361081	38381.8	87.6654	390570	37219.3	441.43	3.03418e+06	79168.1	17379.9
720996	46104.1	135.653	834146	42107.6	539.662	799014	52173.8	13170.1
951933	36743.9	182.138	288142	24945	215.668	355699	31977.3	7857.78
250492	27840.9	-19.2032	823398	49221.2	735.242	1.00498e+06	62757.4	12902
100655	23635.7	4.81431	570160	38477.9	502.296	602985	44681.5	8247.42
1.18864e+06	63649.7	227.146	3.2427e+06	92054.8	937.144	250084	22422.3	3297.3
739162	37542.9	104.018	678452	44578.1	384.291	1.01651e+06	46223.4	10311.1
339511	40070.3	74.0173	292501	24269.3	355.884	307952	26735.3	6783.32
850944	33930.4	73.5298	1.26644e+06	74847.2	713.005	793860	42323.7	11203.9
843464	42085.3	108.599	831467	52482.9	536.62	732309	40787.9	12934.8
908592	53230.3	214.068	1.3394e+06	46984.5	511.26	1174494	55872.6	16538.9
585394	30567.5	78.0892	258065	20224.8	155.928	1.54987e+06	95442	18694
624662	36296.3	137.786	2.3809e+06	190038	5239.08	268512	23547.2	4099.11
618016	37266.7	165.091	808300	50231.6	465.47	513613	37051.4	10179.1
590642	46763.2	104.24	1.12792e+06	54287.4	525.062	953216	51151	10461.4
966477	59406.9	231.137	740729	41679.5	277.331	975087	59460.1	13446.5
950383	48108.1	239.837	893374	60130.7	695.867	260347	25593.9	4737.47
1.13873e+06	75258.4	157.762	307855	31979.9	203.588	944173	45886.1	7868.09
292251	26757.5	94.4036	802514	40655.8	463.581	1.00194e+06	50580.2	11251.9
621729	34522.3	147.634	782067	42810.2	509.662	1.00871e+06	71142.5	15939.2
268247	24598.8	137.345	360985	37670.6	251.491	322095	29752.9	5615.52
1.11487e+06	84885.2	351.042	776397	43893.8	719.243	1.3375e+06	63535.9	13081.2
870602	51708.1	150.058	1.17382e+06	55732.1	775.077	315108	31291.6	6346.94
551875	33239	84.3094	975442	66326.6	864.709	228995	17967	4448.51
803795	41518.1	159.668	361601	29838.8	285.323	1173017	68836.7	19096.2
709916	40006.4	63.1046	394807	41259.4	382.094	285684	27143.8	4605.73
1187153	68882.8	209.412	391831	38618.7	419.482	798422	48644.8	8952.79
720775	46161.8	152.92	336133	33212.6	299.913	812303	43317.9	9991.31
372390	31088.1	141.756	339554	29030.8	229.033	2.14093e+06	107666	34435.6
1.23313e+06	61578.3	277.763	652555	51333.5	561.669	1.04645e+06	72987.1	21555.3
1053941	46583	177.753	347098	35174.7	272.791	867551	43937.7	8507.94
363529	32410.3	101.505	337508	32011.5	288.488	948409	41394.9	10242.9
238464	18585.7	136.315	230911	19146.1	218.431	388455	31204.1	6093.56
652759	36839.3	162.893	688524	40351.9	551.952	325793	28583.6	4665.6
340434	28595.4	151.526	342129	31198	347.48	337850	27944.5	5473.19
310477	24463	177.46	2.66159e+06	74251	1051.52	336895	33052.4	6338.11
700540	36901.2	174.974	260529	25147.8	170.51	371541	23647.8	7246.67
711292	37593.2	100.1	861644	47880.2	574.12	230330	18077.7	4265.93
1.11352e+06	65222.4	234.546	2152585	68753.8	715.488	255601	22765.1	4064.51
1.12628e+06	76960.3	321.844	4.63168e+06	108982	1031.89	1131421	112577	23041
229512	26066.2	13.9152	7505221	113571	1194.98	684107	33421.7	10063.5
288303	22925.3	136.756	295422	26591.4	258.719	863682	48311.9	8345.34
990822	53740.5	275.242	887365	39294.8	534.2	210729	19529.4	3193.59
608118	40377.4	75.9698	852810	48514.1	540.284	271665	19841.5	4978.64
5.61855e+06	131302	361.576	310332	30570.5	166.263	495737	36835.2	8058.43
680904	40692.2	118.637	896220	49003	667.189	1.63349e+06	78951.8	20897
331350	31224.4	73.7736	1.22224e+06	64257.9	736.579	847051	46838.5	11221
343775	29235.7	109.559	884491	52259.1	448.659	288616	26854.2	5714.22
906460	50999.9	147.928	235004	20789.1	85.5415	210580	22107	3380.19
777598	43694.7	159.522	5.91757e+06	185624	3008.76	375193	31844.2	7378.19
5.01745e+06	108968	373.015	865417	41614.7	564.216	851520	44359.4	13110
817048	40364.3	122.545	1.14931e+06	52048.9	683.536	366802	30214	6867.61
501115	31905	79.3956	605657	38129.2	319.554	3.81177e+06	82390	18529
1773369	110019	406.573	1.17498e+06	81006.8	1013.46	370434	34339.6	7002.39
921873	45199.7	159.888	894625	43491.7	479.515	217654	19818.1	3462.65
291863	26513.9	83.8861	1.63237e+06	91929.6	1150.29	290989	25956.4	4981.75
1.001e+06	45164	189.15	579226	44907.5	401.629	768680	38829.7	10939
255513	24363.9	89.5913	289266	27045.7	337.352	310082	30450.4	5671.44
700520	41866.2	86.9986	927948	53998.4	609.133	609021	36120.2	7652.55
1.06896e+06	70900	148.516	1130351	77104.1	961.007	1.35018e+06	61515.5	12121.9
1053399	81669.5	324.062	755804	44477.8	489.209	294035	28139.4	5544.08
4.04313e+06	105757	376.705	248217	19824.6	151.526	873707	47534.8	10819.7
651426	38975.2	75.1558	1.09909e+06	57037.2	753.129	2.55654e+06	92582.2	22808.9
293037	26879.2	51.3573	687319	41771.5	496.104	346432	28394.6	5528.47
569536	36657.6	115.834	1.15297e+06	82474	711.663	1.10295e+06	94501.1	30942.5
1006763	37885.8	185.937	654194	43511.8	427.863	592139	38220.8	7951.96
911188	43429.7	110.224	1.5676e+06	56599.1	676.651	4.79434e+06	144225	32375.8
331220	24451.8	131.384	5.46068e+06	107191	1360.18	1.07556e+06	53643.3	9557.62
378640	30989.9	160.768	1.00663e+06	54713.7	589.288	1.31011e+06	66454.6	26275.2
746659	49581.9	130.943	348400	34645	288.632	1.03977e+06	82038.6	14411.9
614471	35776.4	146.9	1.27134e+06	84803.1	992.354	887155	61511.9	12471
279595	23255.9	60.6957	1254145	77109.9	680.23	1.21657e+06	60245.4	17216.8
2.12044e+06	232942	1187.14	570038	38053.2	393.497	1.08724e+06	85074	21648
713697	36041.4	145.725	223971	23113.5	87.7629	639985	34234	6891.9
1.07672e+06	51104.8	160.768	1.01037e+06	57117.1	520.695	337604	33113.8	5898.56
296329	24571.5	60.0544	359609	39194.8	284.459	254374	23511.1	4928.23
1.00097e+06	48656	121.291	1.38069e+06	71132.2	781.114	1.04343e+06	41186	13510.9
968869	43024.1	193.455	798631	41667.8	456.16	286172	29107.7	5956.1
1.25235e+06	65254.9	187.033	221931	20049.6	237.663	5.24974e+06	103078	20071.3
832273	40351.2	138.889	288783	23738	231.137	1.17468e+06	70753.7	24821.2
1.45728e+06	63885.1	268.609	1.28628e+06	66384.2	755.927	1.25271e+06	69788.4	19385.6
988091	64635.2	158.715	364742	36646.2	530.463	355892	29358.3	5867.28
638841	43094.1	156.882	272168	27472	268.392	1.12387e+06	59928.2	15040.5
391941	36202	88.5543	1.02888e+06	61560.1	804.911	723522	44157.4	7885.95
1346945	81473.9	259.08	626855	40006.2	388.542	905512	46305.5	10185.7
330938	30895.1	131.9	322771	29353.7	232.008	575937	32559.8	8492.19
282638	23021.2	160.768	1.09351e+06	116353	1621.82	1.13281e+06	88459.6	22246.8
855066	50362.8	221.555	772547	42313.2	539.731	709773	36875.9	10426.1
1.18469e+06	51207.1	249.899	845782	44717.5	455.529	257253	27687.1	5387.13
877191	38461	263.341	945026	50688.3	521.319	371942	35509.3	7893.43
515564	35340.8	151.379	350901	31511.7	356.809	339980	34469.8	7369.58
348941	36932.4	90.554	1.25485e+06	63915	737.849	277611	26105.7	5001.23
610527	32456.7	141.977	928481	51942	376.421	796038	41700.5	9269.71
1.35266e+06	75472.9	280.356	252545	22855.3	171.754	245274	23587.2	3606.18
1.00485e+06	50359.1	191.558	913008	51279	567.244	219087	14539.6	4595.78
693800	35489.7	178.923	1.00653e+06	43959.1	609.338	655061	60346.7	13715.7
268096	23407.2	28.0569	816464	43515.4	461.972	901789	42447.4	9501.49
987451	48804.4	122.324	712974	41914.7	469.386	969056	41703	13983.7
1.08717e+06	65391	126.598	744731	71295.8	1156.85	839299	49118.9	9792.71
1.08643e+06	58711.3	181.115	279109	25300.5	243.531	221961	18666.8	3328.93
1.62525e+06	57044.4	104.166	1.4486e+06	73388.2	785.091	247430	19463.8	5255.6
1.28251e+06	88294.2	331.067	965987	58345.6	583.87	224760	18037.1	3419.79
988360	44778.7	71.3388	1.07603e+06	57351.1	650.253	6910901	145344	44995.2
1.17172e+06	86515.7	293.879	1.26554e+06	91124.6	1370.91	215804	21269.7	3528.09
270409	25920.4	149.837	721832	37681.1	355.813	287833	25375.1	4512.54
563853	35499	130.574	949004	57752.6	596.07	994275	45716.4	9569.19
966333	47053.8	181.773	322273	25875.2	317.621	525593	36786	6580.98
342774	30994.6	29.1421	672742	54235	900.644	331314	26725.3	6408.36
749523	33820.5	102.836	202004	25248.4	239.764	946096	52715.6	10787.1
925862	66775	261.68	373296	29789.9	321.128	2779578	76423.7	13466.7
349969	29684.3	162.82	285631	30701.5	402.618	1.26617e+06	61155.2	15688.7
692382	59668.8	185.864	900924	90371.2	1206.13	1.7882e+06	71996.6	17276.9
73577	28034.2	86.7022	1.07809e+06	52841.9	633.472	268726	24156.3	4480.84
2.17312e+06	176211	685.087	196322	20329.6	111.774	283848	22485.9	4148.88
947177	60344.8	195.497	580602	39977.9	414.195	295829	27725.6	3784.72
350389	30450.7	96.7716	294910	27901.1	346.126	1144389	51718.8	11258.4
1494084	102927	218.503	768436	40877	480.981	971694	40795.9	15965.9
320108	25753.5	55.9754	1.48382e+06	94640.6	1217.57	927212	46211.4	8914.31
387140	259323	1000.4	619102	82067.1	664.821	805509	40232.3	13639.1
376331	33764.8	112.586	1.64729e+06	77097.9	1016.36	353985	29458.6	6130.27
672808	37322.7	110.298	9956284	146026	1679.72	1.3482e+06	62475.4	18185
335259	28930.1	148.002	922321	55355.5	398.024	640956	35297.3	7809.42
731594	39271.1	181.188	1.18628e+06	59753.1	690.682	1.216e+06	49395.7	11974.3
325001	26007.7	28.4444	561392	32703.1	215.086	386668	39764.7	6414.57
701486	40876.8	183.454	741855	37868.1	418.284	973460	62188.7	14653.9
819079	42228.3	96.1797	761919	41543.4	416.522	927276	47624.2	12400.6
1.0056e+06	47630.2	110.15	693478	51856.3	635.989	372165	31514.6	7790.85
855659	56204.4	161.281	683111	45081.3	405.867	2.14098e+06	65646.8	21928
1.06478e+06	58312	226.638	240221	22864.5	182.212	207960	16494.2	3370.16
930883	49598.3	190.536	1.67082e+06	66526	715.085	375946	40316.3	8128.6
725912	39329	164.872	1.15808e+06	60865.5	591.961	1856956	84970.3	20106.3
1.60131e+06	61749.7	141.462	273195	27386.9	248.091	328257	25996.9	5502.56
301914	29390.1	39.9089	1.11579e+06	45070.2	636.125	881152	44367.4	10093.7
897140	43029.3	128.66	1.05959e+06	54961	649.235	1.07097e+06	71978	12816.1
782365	41586.9	194.768	674734	43472	479.236	655158	35554.5	7023.78
918323	55587.1	173.584	347651	32187.9	335.424	819152	53710.9	11058.8
2.24064e+06	143238	664.212	1.14159e+06	55643.5	580.096	1.03997e+06	85403.2	23465.1
662597	38670.6	101.949	1477737	95807.8	968.914	584277	27549	10347.6
317037	27898.1	74.0986	949989	45074.1	505.424	396462	37111.6	6386.9
793127	51268.3	152.48	777188	40839.5	375.144	1.03072e+06	58115.8	12600.1
1.22861e+06	57682.3	200.528	224956	18701.9	81.4402	311489	35020.6	6787.41
242131	22859.9	79.7225	295018	27448.5	97.6594	1.17422e+06	67064.9	12953.7
1.13068e+06	57245.2	124.313	1.34364e+06	79441.5	1103.41	539989	37042.3	10117.7
359517	30235.8	130.943	1329157	55296.9	1061.54	836854	44028.7	8872.94
839743	42569.8	174.023	3.5525e+06	87415.9	822.278	2.89045e+06	79455.2	16221.9
318630	33933.4	49.1358	889760	52198.6	703.804	238444	27619.3	3650.87
331935	28980.9	73.1237	840971	51315.5	577.006	1.86164e+06	73621	20404.2
528361	30851.8	118.121	328562	27600.5	335.71	981676	97360.9	20344.2
722145	42116.2	147.634	647218	63043.2	787.608	250580	24723.5	3796.23
1150209	58128.5	245.92	377022	33984.4	344.201	224437	18050.7	3493.29
1.09536e+06	56830.3	222.064	666804	46287.5	523.122	668073	55830.7	14025.7
301255	26730.6	83.7379	336516	33031.2	375.57	1.74725e+06	86382.4	21155.9
1.14399e+06	65585	192.142	310357	30394.4	312.464	892227	79869.3	20223.9
1436552	68931.5	252.142	1394430	56497.7	1204.08	1.97341e+06	70370.7	15297.5
400179	35668.9	172.486	4697941	115455	1922.51	553620	29218.9	8258.79
628654	32707.3	78.8238	332304	34082.3	368.257	269120	25559.9	4287.54
356386	34573.8	109.559	280395	19860.1	212.032	548636	34421.4	7562.11
933314	44751.8	163.553	759043	49139.2	424.836	1.0596e+06	54390	12112.9
248741	23088.8	151.893	5868072	120305	1349.8	666823	44041.2	9481.58
1.11277e+06	52763.5	191.047	2.11387e+06	128630	1506.25	378164	33662.3	6231.37
351445	31826.6	129.47	1.35581e+06	74111.1	1135.18	263732	27979	5622.94
586887	35670.1	121.66	299392	32236.2	356.525	314310	26987.2	5855.78
380683	33102	73.0425	360721	54748.5	729.758	378009	40490.2	9107.68
663172	36104.6	189.223	354562	34813.4	552.503	206177	18415.8	2709.06
672020	33166	122.913	233112	20736.8	106.9	786308	39299.9	9195.37
559827	29890.5	164.945	1.12389e+06	51331.8	688.458	1.3117e+06	66514.7	16140.5
398881	37384.5	119.374	985695	51007.8	560.361	3.6237e+06	96638.2	19516.8
275624	24477.9	152.113	1.07768e+06	83687.6	1139.84	1.24996e+06	70577.5	18600.3
760232	37616.6	180.896	325853	33776.2	337.495	764116	50737.8	10423.9
289913	22326.3	52.7086	4393631	99427.2	1641.03	2.82973e+06	79567.8	15730.3
[truncated: 8,002 more rows]

## Sheet: 1B
Control	strain 1 censored	pGPD-SSD1	strain 2 censored	ssd1d	strain 3 censored	strain4	strain 4 censored	%	Control
15		30		22	12			1	0	0
22		25		8	14			2	0	0
34		34		10	18			3	0	0
19		35		12	14			4	0	0
27		20		17	17			5	0	0
25		35		19	15			6	0	0
28		33		16	14			7	0	0
27		25		14	14			8	0	0
23		35		20	13			9	1	0
29		28		13	12			10	0	0
22		24		14	12			11	1	0
18		35		20	16			12	1	0
21		34		12	14			13	0	0
36		15		15	16			14	2	0
25		36		14	13			15	3	0
20		31		14	16			16	0	0
22		26		16	18			17	4	0
17		30		12	13			18	2	0
24		28		15	13			19	4	0
20		33		12	16			20	4	0
26		36		12	13			21	3	0
27		27		14	12			22	7	0
23		29		14	15			23	4	0
31		34		12	15			24	3	0
25		31		16	13			25	5	0
18		26		12	13			26	2	0
17		42		16	16			27	3	0
35		30		16	12			28	2	0
21		27		15	11			29	2	0
25		39		17	12			30	2	0
15		41		14	14			31	3	0
22		27		16	16			32	0	0
19		17		20	13			33	0	0
15		35		19	12			34	1	0
19		32		21	14			35	1	0
11		36		12	16			36	2	0
28		25		16	9			37	0	0
24		28		15	19			38	1	0
22		29		10	17			39	0	0
21		34		15				40	0	0
20		26		14				41	0	0
31		40		17				42	0	0
38		31		18				43	0	0
30		28		15				44	0	0
30		33		15				45	0	0
26		34		16				46	0	0
14		30		15				47	0	0
12		31		25				48	0	0
20		27		15				49	0	0
36		34		10				50	0	0
17		19		12				%	pGPD-SSD1
14		30						1	0	0
31		28						2	0	0
22		31						3	0	0
23		28						4	0	0
24		30						5	0	0
22		16						6	0	0
25		25						7	0	0
9		31						8	0	0
17		30						9	0	0
29		23						10	0	0
19		23						11	0	0
23		40						12	0	0
								13	0	0
								14	0	0
								15	1	0
								16	1	0
								17	1	0
								18	0	0
								19	1	0
								20	1	0
								21	0	0
								22	0	0
								23	2	0
								24	1	0
								25	4	0
								26	3	0
								27	4	0
								28	6	0
								29	2	0
								30	7	0
								31	6	0
								32	1	0
								33	3	0
								34	6	0
								35	5	0
								36	3	0
								37	0	0
								38	0	0
								39	1	0
								40	2	0
								41	1	0
								42	1	0
								43	0	0
								44	0	0
								45	0	0
								46	0	0
								47	0	0
								48	0	0
								49	0	0
								50	0	0
								%	ssd1d
								1	0	0
								2	0	0
								3	0	0
								4	0	0
								5	0	0
								6	0	0
								7	0	0
								8	1	0
								9	0	1
								10	3	0
								11	0	1
								12	9	7
								13	1	8
								14	8	7
								15	9	3
								16	8	7
								17	3	2
								18	1	2
								19	2	1
								20	3	0
								21	1	0
								22	1	0
								23	0	0
								24	0	0
								25	1	0
								26	0	0
								27	0	0
								28	0	0
								29	0	0
								30	0	0
								31	0	0
								32	0	0
								33	0	0
								34	0	0
								35	0	0
								36	0	0
								37	0	0
								38	0	0
								39	0	0
								40	0	0
								41	0	0
								42	0	0
								43	0	0
								44	0	0
								45	0	0
								46	0	0
								47	0	0
								48	0	0
								49	0	0
								50	0	0
								%	strain4
								1	0	0
								2	0	0
								3	0	0
								4	0	0
								5	0	0
								6	0	0
								7	0	0
								8	0	0
								9	0	0
								10	0	0
								11	0	0
								12	0	0
								13	0	0
								14	0	0
								15	0	0
								16	0	0
								17	0	0
								18	0	0
								19	0	0
								20	0	0
								21	0	0
								22	0	0
								23	0	0
								24	0	0
								25	0	0
								26	0	0
								27	0	0
								28	0	0
								29	0	0
								30	0	0
								31	0	0
								32	0	0
								33	0	0
								34	0	0
								35	0	0
								36	0	0
								37	0	0
								38	0	0
								39	0	0
								40	0	0
								41	0	0
								42	0	0
								43	0	0
								44	0	0
								45	0	0
								46	0	0
								47	0	0
								48	0	0
								49	0	0
								50	0	0

## Sheet: 1D SSD1-Foci
0	0	0	0	0	0	0	0	0	0	0	0	0	0	0	0	0	0	0	0	0	0	0	0	0	0	0	0	0	0	0	0	0	0	0	0	0	0	0	0	0	0	0	0	0	0	0	0	0	0
0	0	0	0	0	0	0	0	0	0	0	0	0	0	0	0	0	0	0	0	0	0	0	0	0	0	0	0	0	0	0	0	0	0	0	0	0	0	0	0	0	0	0	0	0	0	0	0	0	0
0	0	0	0	0	0	0	0	0	0	0	0	0	0	0	0	0	0	0	0	0	0	0	0	0	0	0	0	0	0	0	0	0	0	0	0	0	0	0	0	0	0	0	0	0	0	0	0	0	0
0	0	0	0	0	0	0	0	0	0	0	0	0	0	0	0	0	0	0	0	0	0	0	0	0	0	0	0	0	0	0	0	0	0	0	0	0	0	0	0	0	0	0	0	0	0	0	0	0	0
0	0	0	0	0	0	0	0	0	0	0	0	0	0	0	0	0	0	0	0	0	0	0	0	0	0	0	0	0	0	0	0	0	0	0	0	0	0	0	0	0	0	0	0	0	0	0	0	0	0
0	0	0	0	0	0	0	0	0	0	0	0	0	0	0	0	0	0	0	0	0	0	0	0	0	0	0	0	0	0	0	0	0	0	0	0	0	0	0	0	0	0	0	0	0	0	0	0	0	0
0	0	0	0	0	0	0	0	0	0	0	0	0	0	0	0	0	0	0	0	0	0	0	0	0	0	0	0	0	0	0	0	0	0	0	0	0	0	0	0	0	0	0	0	0	0	0	0	0	0
0	0	0	0	0	0	0	0	0	0	0	0	0	0	0	0	0	0	0	0	0	0	0	0	0	0	0	0	0	0	0	0	0	0	0	0	0	0	0	0	0	0	0	0	0	0	0	0	0	0
0	0	0	0	0	0	0	0	0	0	0	0	0	0	0	0	0	0	0	0	0	0	0	0	0	0	0	0	0	0	0	0	0	0	0	0	0	0	0	0	0	0	0	0	0	0	0	0	0	0
	0	0	0	0	0	0	0	0	0	0	0	0	0	0	0	0	0	0	0	0	0	0	0	0	0	0	0	0	0	0	0	0	0	0	0	0	0	0	0	0	0	0	0	0	0	0	0	0	0
	0	0	0	0	0	0	0	0	0	0	0	0	0	0	0	0	0	0	0	0	0	0	0	0	0	0	0	0	0	0	0	0	0	0	0	0	0	0	0	0	0	0	0	0	0	0	0	0	0
		0	0	0	0	0	0	0	0	0	0	0	0	0	0	0	0	0	0	0	0	0	0	0	0	0	0	0	0	0	0	0	0	0	0	0	0	0	0	0	0	0	0	0	0	0	0	0	0
			0	0	0	0	0	0	0	0	0	0	0	0	0	0	0	0	0	0	0	0	0	0	0	0	0	0	0	0	0	0	0	0	0	0	0	0	0	0	0	0	0	0	0	0	0	0	0
			0	0	0	0	0	0	0	0	0	0	0	0	0	0	0	0	0	0	0	0	0	0	0	0	0	0	0	0	0	0	0	0	0	0	0	0	0	0	0	0	0	0	0	0	0	0	0
					0	0	0	0	0	0	0	0	0	0	0	0	0	0	0	0	0	0	0	0	0	0	0	0	0	0	0	0	0	0	0	0	0	0	0	0	0	0	0	0	0	0	0	0	0
								0	0	0	0	0	0	0	0	0	0	0	0	0	0	0	0	0	0	0	0	0	0	0	0	0	0	0	0	0	0	0	0	0	0	0	0	0	0	0	0	0	0
								0	0	0	0	0	0	0	0	0	0	0	0	0	0	0	0	0	0	0	0	0	0	0	0	0	0	0	0	0	0	0	0	0	0	0	0	0	0	0	0	0	0
												0	0	0	0	0	0	0	0	0	0	0	0	0	0	0	0	0	0	0	0	0	0	0	0	0	0	0	0	0	0	0	0	0	0	0	0	0	0
														0	0	0	0	0	0	0	0	0	0	0	0	0	0	0	0	0	0	0	0	0	0	0	0	0	0	0	0	0	0	0	0	0	0	0	0
																		0	0	0	0	0	0	0	0	0	0	0	0	0	0	0	0	0	0	0	0	0	0	0	0	0	0	0	0	0	0	0	0
																						0	0	0	0	0	0	0	0	0	0	0	0	0	0	0	0	0	0	0	0	0	0	0	0	0	0	0	0
																									0	0	0	0	0	0	0	0	0	0	0	0	0	0	0	0	0	0	0	0	0	0	0	0	0
																																0	0	0	0	0	0	0	0	0	0	0	0	0	0	0	0	0	0
																																				0	0	0	0	0	0	0	0	0	0	0	0	0	0
																																							0	0	0	0	0	0	0	0	0	0	0
																																												0	0	0	0	0	0
																																														0	0	0	0
																																																	0
[truncated: 13 more columns]

## Sheet: 1D SSD1-Intensity(raw)
81.168	80.398	78.323	78.366	79.386	76.387	79.091	79.23	82.778	75.187	79.79	78.49	81.317	85.832	75.962	81.914	76.886	77.078	78.455	78.902	81.486	78.788	77.254	79.789	78.753	76.324	77.061	76.042	80.508	83.616	79.26	79.896	89.683	87.997	87.044	74.995	84.629	84.168	80.109	81.026	82.924	78.106	76.604	79.549	82.455	77.355	81.426	91.804	78.17	77.099
81.118	81.579	80.924	83.181	77.594	84.293	82.151	85.328	82.329	77.5	80.294	83.02	84.48	85.452	78.436	79.096	83.206	79.539	80.708	80.696	83.498	81.623	81.303	80.571	77.378	82.202	80.817	77.195	83.896	86.868	79.461	83.949	88.857	88.93	87.067	78.104	85.418	85.067	83.453	85.874	82.296	71.523	79.042	81.961	83.193	81.445	80.911	88.3	80.849	82.528
78.931	84.7	83.706	83.1	76.103	87.207	82.701	83.602	81.179	79.865	82.31	82.235	87.783	88.559	78.956	81.317	82.753	79.226	81.288	81.972	86.172	85.549	86.098	81.371	84	81	81.75	82.674	85.625	87.787	83.646	83.615	88.503	90.13	88.335	85.996	87.201	85.889	83.25	87.366	81.911	79.561	83.307	80.942	81.289	82.85	81.533	83.231	79.075	80.975
78.105	80.851	84.142	85.016	80.051	84.893	83.57	85.715	82.855	81.132	79.779	78.593	91.929	82.029	77.083	80.174	86.349	84.339	81.417	81.832	89.374	86.626	87.62	82.027	83.646	79.729	84.11	85.826	88.125	89.31	84.628	85.298	85.369	87.967	87.832	90.293	83.304	89.514	85.614	90.705	82.326	82.475	84.268	77.56	86.722	85.978	82.995	86.72	79.186	80.603
82.52	85.272	82.399	87.1	80.181	82.353	82.811	84.779	81.34	84.437	80.314	82.341	93.593	84.305	77.33	78.831	86.136	85.661	85.712	84.835	88.542	86.804	83.682	83.89	81.166	77.016	80.09	85.393	84.24	82.94	81.789	85.348	84.149	87.133	91.596	88.17	86.454	91.521	86.862	86.156	84.453	84.008	85.113	84.906	90.162	87.257	82.875	81.779	85.728	76.961
80.959	85.071	81.621	86.8	80.9	78.541	82.768	87.571	83.356	84.34	81.887	83.983	91.463	85.59	75.463	80.662	86.588	84.916	80.752	87.466	87.16	84.739	85.425	82.787	88.867	86.966	83.123	83.23	86.93	84.247	82.201	89.11	82.041	89.151	91.187	87.447	85.803	90.509	89.049	88.187	84.384	85.682	83.74	84.234	88.658	85.92	81.185	79.406	88.094	81.912
85.673	83.215	85.504	85.851	77.913	79.932	80.609	89.419	84.083	83.474	79.874	82.858	93.08	85.978	73.755	79.893	88.375	84.625	82.727	87.556	89.753	85.128	81.602	79.591	92.067	86.271	85.594	81.538	86.502	81.633	84.065	88.077	84.185	87.198	92.342	87.553	85.94	88.145	88.137	91.455	86.464	81.18	82.674	84.83	87.43	82.623	85.932	79.543	84.522	83.071
84.549	79.937	85.012	85.651	79.616	80.405	80.177	90.046	83.426	84.056	80.938	85.034	84.879	82.447	77.47	82.726	87.724	79.796	82.517	85.33	87.567	85.979	81.66	82.449	91.793	82.651	87.366	83.948	88.06	83.948	86.144	88.428	89.11	89.734	92.303	88.175	87.444	88.768	88.394	91.753	87.701	84.728	85.101	83.365	89.597	81.272	86.781	84.689	82.576	78.751
88.906	85.64	84.761	88.063	78.715	80.122	82.737	91.699	79.917	84.996	78.597	85.02	85.779	84.728	77.458	80.601	87.07	83.018	81.998	86.527	88.06	85.278	86.003	82.74	89.415	81.759	95.941	87.593	89.472	83	84.913	88.076	90.937	89.844	90.852	88.416	85.9	87.223	92.421	91.779	85.981	84.167	87.601	85.779	91.276	86.617	91.633	88.372	79.404	84.699
87.526	86.16	86.54	87.999	75.293	80.974	82.026	91.243	84.483	84.029	77.941	84.92	85.521	85.921	73.762	77.78	85.62	81.84	78.239	83.428	87.284	84.416	88.214	79.753	95.034	88.452	85.995	87.851	90.255	82.016	87.065	88.543	91.591	86.951	90.093	90.567	91.269	87.473	87.544	93.512	81.82	81.693	88.331	85.097	91.642	85.782	91.358	100.594	78.745	86.236
90.586	79.815	85.694	89.837	78.15	80.105	80.891	90.861	85.538	83.31	75.955	84.876	85.709	86.618	76.964	80.616	87.019	84.035	79.208	82.959	87.521	89.24	88.199	84.971	94.31	88.138	95.515	88.104	90.787	81.405	86.862	89.971	90.768	87.849	91.551	89.502	88.819	91.199	87.215	96.25	86.516	85.277	87.749	84.086	89.75	86.406	91.764	104.339	81.233	88.13
90.592	85.9	85.41	92.02	75.86	80.14	79.964	91.193	87.771	85.393	79.086	85.067	84.168	88.391	74.727	83.693	86.115	83.577	81.449	83.079	87.008	85.071	88.487	88.127	92.334	87.844	94.801	90.251	86.34	81.588	86.666	90.541	90.515	84.517	91.06		87.246	89.822	85.534	93.173	84.967	86.928	86.357	84.212	88.207	83.796	85.957	80.244	80.755	85.383
94.561	83.338	88.327	92.118	79.305	84.161	85.403	88.743	90.139	86.417	78.532	88.417	87.342	88.984	74.118	77.361	84.903	83.425	84.147	82.964	87.385	79.424	87.351	87.113	98.501	86.628	97.964	90.207	87.74	83.931	86.677	91.699	83.626	88.172	100.052		85.361	86.679	82.916	96.146	91.429	90.952	86.435	83.028	89.866	83.591	88.116		81.171	85.655
94.428	82.062	86.475	96.349	77.797	85.42	87.626	87.483	93.092	82.439	79.194	91.311	86.419	86.213	75.566	80.187	84.329	82.954	83.848	86.547	87.142	82.262	93.598	88.171	102.66	86.436	109.113	90.315	88.963	83.859	87.976	89.437	86.161	84.497	98.027		86.931	86.578	89.296	96.406	91.759	92.102	87.731	86.317	88.941	85.361	98.826		79.626	86.978
90.563	84.943	84.96	102.198	83.449	84.156	84.628	90.206	94.707	87.749	78.358	90.589	87.319	87.679	74.352	80.783	83.753	84.128	82.465	87.894	85.342	83.31	94.089	90.249	104.072	86.894	104.43	89.333	86.52	83.555	86.719	83.1	87.486	88.54	91.749		84.476	87.643	84.472	96.545	95.653	91.721	87.925	84.124	88.177	83.553			79.66	85.07
	82.85	84.18	99.627	88.253	86.556	89.448	90.574	92.243	88.12	83.975	96.27	88.52	86.03	78.712	87.079	83.263	88.729	83.697	89.224	84.304	80.206	90.903	89.181	105.427	85.81	98.558	89.794	88.207	84.019		90.378	88.329		94.452		84.251	86.172	83.321	91.352	94.897	89.577	89.404	86.062	87.242	87.271			86.19	82.63
	83.038	86.119	95.003	84.334	86.203	96.518	87.166	96.707	89.35	85.263	95.502	85.404	75.281	81.191	85.988	83.301	92.247	83.409	87.347	83.784	78.448	92.402	92.276	105.141	87.604	86.311	88.585	88.935	84.72		86.902	91.448		93.822		89.212	88.766	85.096	86.697	94.882	91.843	90.955	88.473	91.911	85.225			88.265	84.891
	84.088	87.388	98.183	87.82	83.352	94.643	84.608	100.068	84.851	80.961	99.072	86.67	84.354	81.717	87.607	84.834		84.894	93.397	81.313	85.959	92.375	87.583	103.189	87.882		90.308	89.304	85.292		93.074	92.257		93.668		88.03	86.035	85.078	92.678	90.26	92.306	92.862	85.448	86.157	85.172			88.233	86.229
	85.365	90.36	93.96	82.02	87.214	93.85	84.231	98.503	87.298	86.142		80.59	84.289	88.73	85.68	84.497		83.881	93.769	85.14	85.315	89.724	91.763	99.201			87.718	84.086	85.459		91.642	102.219		91.005		88.912	85.75	92.39	92.996	94.524	90.658	89.514	85.027	88.76	85.876			88.819	87.955
	87.201	94.093		81.454	85.491	94.159	87.168	100.674	87.999	87.706		88.895	85.072	89.003	91.702	78.749		83.74	84.207	83.314	86.219	88.482	92.876	101.651			89.661	86.032	86.255		95.505					91.131	83.514	102.663	90.931	83.287	88.851	89.957	82.147	87.212	86.554			89.477	88.02
	87.854	89.96		82.614	85.334	99.965	87.436	96.22	89.49	88.426		89.174	82.245	83.801		82.329		90.144		86.159	83.664	86.773	90.681	100.051			87.554	88.637	87.119		94.435					89.881	83.975	97.597	94.54		91.945	89.967	87.03	81.733	90.006				87.445
	93.066	89.92		81.16	90.854	99.707	82.522	105.003	84.289	84.404			83.989	85.044		91.274		95.01		81.778	86.719	96.409	93.474	103.826			90.621		88.808		97.652					94.709	86.171	98.66			96.66	92.651	85.981	78.011	90.444				89.805
		84.108		86.607	102.499	99.696	86.882	110.784	89.783				81.315	84.353				99.088		88.313	83.181	87.471	93.533	100.753			89.216		87.145							94.584	85.627				89.445	93.758	90.026	89.745	92.842				89.377
		90.636		86.361	107.508	97.536	85.479		92.753				85.502	82.517				92.494		85.923	80.529		93.733	98.966			89.601		87.158							94.505	85.713				93.23	90.339	87.393	84.109	91.511				88.046
		97.57		86.676	103.204	102.242	94.746		94.919				84.711	82.77						88.005	89.971		91.618	99.757			88.968		88.262							92.686					94.884	94.438	87.166	90.392	92.533				95.969
		104.228		89.812		98.574	90.445		99.354				81.839							86.622	92.245		91.877				88.06									92.129					90.486	95.972	85.909	86.465	95.52				94.477
		101.42		87.078		111.769	96.467		101.324				82.457								94.749		91.313				89.519									93.833					93.068	85.951	89.014	86.426					93.145
		111.184				109.598			103.786				80.784										88.644				86.563									92.807					94.391	82.323	90.072	87.161					93.544
		108.899							100.079				81.784										89.131				87.937														95.679	86.587	90.578	86.173					97.04
		106.596											80.224										88.872				92.182														99.503	84.559	90.122	87.178					94.189
		109.208											85.126										89.877				91.027														96.746	87.032							95.109
		109.552											83.33														92.001															86.496							92.933
		109.552											85.559														91.065															87.341							95.346
		107.46											87.829														87.774															89.12							96.516
													85.721														88.531															91.043							94.391
													88.851																													88.474							96.739
																																										83.5
																																										81.992
15	22	34	19	27	25	28	27	23	29	22	18	21	36	25	20	22	17	24	20	26	27	23	31	25	18	17	35	21	25	15	22	19	15	19	11	28	24	22	21	20	31	38	30	30	26	14	12	20	36
[truncated: 13 more columns]

## Sheet: 1D pGPD-Foci
0	0	0	0	0	0	0	0	0	0	0	0	0	0	0	0	0	0	0	0	0	0	0	0	0	0	0	0	0	0	0	0	0	0	0	0	0	0	0	0	0	0	0	0	0	0	0	0	0	0
0	0	0	0	0	0	0	0	0	0	0	0	0	0	0	0	0	0	0	0	0	0	0	0	0	0	0	0	0	0	0	0	0	0	0	0	0	0	0	0	0	0	0	0	0	0	0	0	0	0
0	0	0	0	0	0	0	0	0	0	0	0	0	0	0	0	0	0	0	0	0	0	0	0	0	0	0	0	0	0	0	0	0	0	0	0	0	0	0	0	0	0	0	0	1	0	0	0	0	1
0	0	0	0	0	0	0	0	0	1	1	0	0	1	0	2	0	0	0	0	0	1	0	0	0	0	0	0	0	0	0	0	1	0	0	0	0	0	0	0	0	1	0	0	0	0	0	0	0	0
0	0	0	0	0	0	0	0	0	0	0	1	0	1	0	0	0	0	0	0	0	0	0	0	0	1	0	0	0	0	1	0	1	1	0	0	1	1	1	1	0	0	1	0	0	1	1	1	0	1
0	1	0	0	1	0	0	0	0	0	1	0	0	1	0	0	0	0	0	0	1	0	0	0	1	0	0	0	1	0	0	0	0	0	0	0	0	0	0	0	0	0	0	1	0	0	1	0	0	0
0	1	0	0	1	0	0	2	0	0	0	1	1	0	0	0	0	0	0	0	0	1	0	0	2	0	0	0	1	0	0	0	0	0	0	0	1	1	0	0	0	0	1	0	0	1	0	0	1	1
1	0	0	0	0	0	1	0	0	1	0	0	0	1	0	0	0	0	1	0	0	0	0	0	0	1	0	0	0	0	0	0	1	0	0	0	0	0	1	0	0	1	1	0	1	0	1	0	0	0
1	0	0	0	1	0	0	0	0	0	0	2	0	1	0	0	0	0	0	0	0	1	0	2	0	0	1	0	0	1	0	0	0	0	0	0	1	0	0	1	0	1	1	0	1	0	1	0	1	0
0	0	0	1	0	1	0	0	0	1	1	0	2	1	0	0	0	1	0	1	0	0	0	0	1	1	0	1	0	0	1	0	0	1	1	0	0	1	1	0	1	1	0	0	1	0	0	0	1	0
0	0	0	1	1	0	1	1	0	0	1	1	0	0	0	1	0	1	0	0	0	0	1	0	0	0	0	0	0	1	0	1	0	0	0	1	1	0	0	1	0	0	1	1	0	0	0	2	1	0
0	0	0	1	0	1	0	0	1	1	1	0	0	0	1	0	0	0	0	2	0	2	0	0	0	0	0	0	0	0	1	0	0	1	1	0	2	2	1	1	0	0	1	0	1	0	1	0	1	1
1	1	0	1	2	0	0	0	0	1	0	1	0	3	0	0	0	2	0	0	1	0	0	2	0	0	0	1	1	1	1	0	2	1	0	0	0	0	0	1	0	0	1	0	3	0	0	1	0	0
0	0	0	0	1	1	0	0	1	1	0	0	0	2	0	0	0	0	1	1	0	0	0	0	0	1	1	0	1	0	1	1	1	0	2	1	2	0	1	0	0	1	0	0	1	1	1	0	1	1
1	1	0	0	0	1	0	1	0	0	1	2	0	3	1	2	0	0	1	0	1	0	1	0	2	1	0	1	0	0	1	1	1	0	0	2	0	2	0	3	0	0	1	0	1	0	0	0	2	1
1	0	2	0	0	0	0	1	1	1	0	0	1		0	1	1	0	0	2	0	0	0	0	0	0	1	0	0	2	0	0	2	1	3	0	0	0	0	0	0	0	0	1	1	1	1	0	1	1
0	1	0	2	0	1	0	3	0	1	0	0	0		0	0	0	1	2	1	1	0	1	0	2	1	0	0	1	0	0	1	2	1	3	2	3	0	0	1	0	2	2	1	0	2	0	0	1	1
1	2	0	1	0	1	0	1	0	1	0	2	1		0	1	0	1	1	1	0	1	0	0	0	2	2	1	0	0	0	0		0	0	2	2	1	1	1	0	0	1	1	1	0	1	0	0	0
1	0	1	2	2	0	0	0	0	0	0	1	1		1	0	0	2	0	1	0	3	1	0	1	0	0	0	0	2	0	0		0	0	3	1	2	1	2	0	2	0	1	1	2	1	0	0	0
2	1	0	0	5	2	1	0	1	1	0	0	0		0	2	0	0	2	0	2	0	0	1	1	0	0	1	1	0	1	0		0	0	2	0	1	0	2	0	0	2	0	0	1	0	0	0	1
0	0	0	1		0	2	0	0	2	1	0	1		1	1	1	0	0	0	1	1	2	1	0	0	1	2	0	2	0	0		0	2	1	2	1	2	1	0	0	0	0	0	1	0	0	1	2
0	1	0	0		0	2	1	1	0	2	1	1		0	0	1	2	3	1	0	0	0	0	0	0	1	0	0	0	2	0		1	0	0	0	1	1	2	0	1	1	0	0	0	0	2	1	1
0	0	0	1		1	1	0	2	0	0	0	1		0	0	1	0	0	1	0	1	0	1	1	0	0	0	2	2	1	0		0	0	2	1	0	2	0	1	1	1	1	0	0	2	1	0	0
2	1	0	0		0	1	1	0	0	0	0	0		1	2	1	0	3	0	2	0	1	0	0	1	0	1	3	0	1	1		1	0	1	2	0	0	1	1	1	0	1	0	2	1	4	0	0
1	5	1	1		0	1	3	2	0		0	0		0	0	3	2	3	1	0	0	0	2	0	2	2	0	0	1	0	2		0	0	2	2	0	0	1	2	0	0	2	0	0	3	2	0	0
3		0	1		0	1		0	0		0	2		1	1	5	0	3	2	0	3	3	1	1	2	3	1	1	1	1	3		0	1	1		0	2	0	5	1	0	2	1	1	0	3	2	1
1		2	1		2	0		2	1		0	1		0	2		1	1	3	1	2	0	1	1		0	2	3	0	0	3		2	0	0		0	4	1		1	0	5	0	2	1	1	3	0
2		3	1		2	0		0	0		2	2		1	3		0	0	0	0		1	2	0		0	0		2	1			1	1	3		0	2	0		1	1	0	1	1	1	1		3
0		1	0		0	0		1			0	0		0	1		1		0	0		1	2	2		0	1		0	0			0	1	0			5	1		0	1		2	0	2	3		1
1		1	1		0	2		1			2	2		0	2		2		2	2			1	1		2	0		1	1			2	1	2				4		2	1		2	0	2	3		1
		0	1		1	1		0			2	2		1					1	0			0	5		0			0	0			1	2	1				3		0	3		0	0		5		2
		1	1		1	1		1			2	1		0					1	1			1			0			1	0			2	5	2				2		0			2	1				3
		4	1		2	3		1			0	1		2					0	0			1			2			1	2			2		1				3		3			3	2				2
		5	3		3			1			3	2		0						1			0			3			1	1			1		1				5		2				1				3
			5		5			2			2			1						0						1			1	0			4		0						0
														5						3						1			2	0					0						3
																										0			3	1											2
																										0			2	2											2
																										2			4	1											3
																										0				2											1
																										2				3
																										3
[truncated: 13 more columns]

## Sheet: 1D pGPD-Intensity(raw)
292.082	277.805	239.369	268.572	307.487	162.501	254.322	273.686	167.641	204.291	158.1	238.324	264.931	237.761	263.438	293.911	290.58	260.205	224.726	205.837	216.595	254.486	198.447	304.203	251.271	230.778	150.908	176.753	144.066	269.431	244.317	240.841	206.802	157.821	249.993	195.836	173.467	197.917	183.115	249.345	261.945	197.662	192.98	153.587	256.545	218.1	246.943	195.298	259.08	236.188
372.475	341.686	292.833	274.467	360.935	250.034	351.51	316.027	222.149	231.786	267.175	299.714	343.095	318.266	303.357	311.932	335.57	321.739	299.794	281.826	253.162	277.657	230.911	306.893	345.907	327.648	193.943	178.303	259.794	306.267	354.557	278.337	322.028	216.869	313.699	171.458	284.488	227.027	350.678	298.836	176.85	296.146	120.957	252.833	305.053	260.93	239.559	217.677	337.772	315.094
431.957	437.551	330.003	314.769	425.355	254.822	337.411	341.379	220.56	275.032	240.276	317.959	389.229	374.113	393.479	380.077	426.962	391.464	297.601	289.113	287.79	329.714	265.487	346.169	373.948	336.209	308.083	203.753	263.656	422.845	413.08	324.488	375.826	317.898	360.513	210.746	331.541	317.056	383.281	348.857	263.237	257.113	225.559	357.323	321.432	298.428	231.876	259.028	333.431	344.824
439.257	473.856	304.191	353.548	456.403	248.811	340.517	327.263	252.02	281.065	290.235	283.544	468.943	382.792	425.773	370.024	401.034	484.128	319.726	317.018	315.866	344.092	243.961	448.977	461.964	268.676	419.023	232.797	279.491	430.386	442.603	318.653	420.074	275.384	436.726	248.996	314.002	476.198	356.516	273.618	273.416	264.967	285.053	486.187	368.741	265.786	281.085	274.553	363.758	376.287
361.762	403.522	313.239	422.543	464.966	220.616	389.216	366.85	256.891	228.867	319.476	242.961	444.719	366.953	442.352	412.785	475.447	457.483	300.928	353.079	307.933	347.139	269.263	430.689	554.648	344.123	445.573	426.235	362.541	402.117	458.344	301.978	446.106	352.953	446.109	245.236	305.64	441.686	332.4	328.692	258.263	288.069	341.02	527.146	282.918	341.698	295.907	274.096	403.278	343.459
388.377	448.211	366.002	401.933	414.615	274.84	351.128	343.542	329.833	274.589	343.109	349.525	423.883	410.315	438.906	355.956	435.338	467.453	313.987	427.152	258.098	314.94	225.444	463.427	515.188	398.935	441.513	396.762	398.741	446.862	450.986	321.053	462.206	346.82	454.056	250.435	298.532	425.143	342.989	309.725	311.157	283.505	370.829	419.495	321.531	365.261	315.475	297.451	382.175	377.161
398.488	489.284	375.889	373.708	407.504	306.08	344.255	332.188	332.433	281.71	345.938	350.82	411.638	340.686	407.329	385.833	399.522	462.123	312.279	438.292	318.951	285.33	230.535	415.105	642.943	369.078	471.679	385.503	412.747	438.781	454.725	367.359	528.417	337.628	512.29	297.646	318.756	456.494	357.576	275.877	334.391	298.154	337.917	337.701	309.835	356.016	322.398	283.508	399.868	413.573
310.892	476.478	340.057	353.042	459.949	284.86	333.967	365.075	311.167	265.202	357.621	343.304	435.095	348.123	392.607	392.373	453.319	443.115	322.472	435.258	313.144	274.44	247.556	441.602	595.39	351.261	466.968	344.45	427.418	475.671	500.367	387.62	499.649	327.541	539.415	284.811	326.407	351.145	361.564	284.357	339.369	295.375	328.827	397.088	347.863	298.135	360.373	295.622	383.698	431.051
402.155	487.476	279.799	291.472	269.584	291.198	411.569	404.566	332.213	287.166	296.427	354.5	463.709	355.341	388.558	397.015	471.409	417.996	321.169	419.819	441.369	240.34	213.449	475.453	539.557	340.851	457.871	347.203	432.697	457.676	515.195	391.859	582.609	320.017	503.941	278.51	370.484	476.075	342.439	289.757	298.431	318.094	312.933	366.995	302.827	302.878	338.493	279.466	411.807	399.951
334.217	408.541	227.287	354.702	399.967	330.587	404.217	364.148	331.906	278.487	352.832	327.265	524.839	344.43	372.056	400.425	471.029	413.331	298.749	455.5	437.304	289.19	225.245	517.252	526.398	368.859	441.08	357.965	407.029	428.16	457.388	396.311	534.468	288.268	510.202	327.577	358.274	510.182	353.052	296.308	320.464	340.5	287.012	367.24	272.696	307.651	316.823	256.137	388.663	304.496
397.322	404.718	266.072	326.272	414.018	299.605	397.047	296.179	312.142	300.731	355.259	313.523	445.87	301.484	325.502	377.167	472.663	432.987	281.081	291.881	391.387	367.186	232.342	432.858	562.348	374.669	485.891	342.773	445.806	401.05	488.158	416.834	515.649	285.558	511.306	340.185	365.941	490.047	294.761	327.045	279.405	337.002	266.738	360.228	272.487	346.62	281.064	238.205	383.398	276.146
368.765	348.802	291.003	424.421	559.131	353.765	375.267	355.104	321.409	292.775	311.774	290.959	351.739	346.4	314.574	342.276	510.074	422.467	412.534	477.755	365.835	334.516	223.187	435.011	519.25	340.728	501.673	297.895	469.203	385.046	489.518	341.389	429.585	274.421	486.011	325.751	319.401	462.57	283.417	306.981	280.343	320.511	284.522	353.779	299.813	331.344	309.669	286.434	377.98	290.16
329.528	441.78	260.633	443.537	432.047	357.857	413.056	326.259	313.192	327.405	343.671	296.311	456.989	430.563	318.199	346.413	454.714	406.046	365.064	440.863	336.129	291.485	260.224	258.963	508.957	319.339	479.762	364.162	452.73	326.924	510.454	388.889	466.794	258.504	526.04	330.858	336.877	450.127	305.794	311.75	327.788	325.833	295.893	335.172	291.412	313.462	329.508	231.882	360.512	323.392
310.089	426.421	246.522	422.183	475.049	337.37	395.305	301.637	299.314	358.981	317.653	355.933	416.784	588.773	336.937	336.203	402.016	386.257	380.641	427.856	334.034	351.247	268.097	424.813	479.601	312.056	521.12	342.103	390.451	363.317	515.748	360.774	401.436	235.045	482.305	318.598	323.736	483.634	265.958	326.539	299.794	335.337	319.189	348.447	242.923	301.598	312.837	209.992	352.354	323.174
339.754	344.238	292.534	317.549	415.134	323.293	350.534	297.712	317.048	363.107	324.153	329.124	347.52	618.6	309.603	322.084	448.946	389.208	345.929	386.908	412.951	326.188	292.218	362.824	306.516	341.915	495.926	415.291	297.915	325.608	461.53	324.014	450.341	273.507	455.644	318.945	327.423	469.804	311.416	277.633	254.858	309.475	297.485	392.212	382.481	343.99	294.181	207.457	283.121	257.539
342.282	376.667	298.828	422.477	359.565	354.304	354.445	341.466	332.998	401.955	315.914	358.931	432.411		271.453	334.166	416.205	345.758	507.232	395.753	357.265	325.974	302.535	358.345	319.58	350.517	506.137	395.015	328.722	319.434	465.88	354.954	411.903	235.106	483.864	364.313	332.641	418.656	268.456	235.74	296.998	262.176	298.579	395.509	374.666	284.64	310.193	183.462	297.601	284.287
330.524	364.681	313.114	394.445	408.913	369.437	348.183	352.294	316.977	355.421	294.684	345.887	405.008		267.962	334.166	409.173	414.031	478.424	320.307	354.497	297.498	281.84	351.726	297.061	344.274	471.814	307.51	365.335	289.382	453.898	330.973	414.802	249.135	445.491	318.11	362.931	432.854	242.598	309.419	293.613	297.058	280.96	347.176	429.195	283.411	331.947	182.107	248.253	272.984
314.975	368.015	314.136	410.923	299.88	318.345	432.37	336.435	268.812	318.591	336.506	373.344	373.512		343.208	287.552	397.306	410.316	437.791	256.663	331.296	305.923	263.457	428.702	303.052	310.48	474.951	291.65	351.703	323.752	465.694	257.125		241.926	440.046	337.96	365.964	400.243	263.149	330.016	337.719	297.802	286.373	372.298	305.538	336.654	355.689	179.389	301.895	213.654
313.103	349.314	345.004	394.195	369.574	294.236	366.667	293.279	274.525	378.593	323.251	391.725	342.23		368.405	280.646	448.026	338.582	363.124	382.842	373.103	347.328	208.29	420.63	294.441	357.556	572.319	296.804	364.76	315.776	451.32	355.959		264.321	468.129	333.157	343.233	379.157	241.985	298.642	306.598	280.16	287.087	399.413	244.197	279.613	358.758	167.154	293.307	257.665
299.13	232.128	344.025	416.061	204.557	351.786	374.698	319.288	299.762	348.395	315.225	364.798	299.725		318.246	322.434	369.25	303.553	343.429	324.882	386.984	340.786	280.648	418.083	285.203	368.35	538.839	394.204	351.193	263.047	415.944	338.234		229.78	431.069	306.107	357.913	350.621	288.87	319.399	303.136	278.989	263.173	369.221	260.314	365.775	368.914	150.874	288.715	258.661
346.936	269.562	349.662	397.005		392.626	359.572	311.27	281.098	358.074	341.475	289.422	413.616		305.894	316.739	382.429	302.329	316.774	306.368	337.485	333.368	245.36	397.376	215.048	321.87	619.368	342.657	412.853	329.145	400.086	304.871		272.094	434.977	291.238	302.819	372.194	278.283	329.049	337.116	274.755	274.476	368.201	248.99	336.395	390.452	166.857	288.596	283.293
314.682	286.517	341.621	399.927		404.025	284.381	336.819	328.231	333.957	352.303	304.672	411.814		284.514	316.724	388.591	239.135	345.286	275.881	371.198	326.149	260.963	314.407	291.606	360.759	690.172	335.879	365.484	308.258	317.101	320.94		251.058	372.57	260.343	306.086	348.473	313.151	310.286	345.364	307.809	298.202	361.381	266.94	334.927	376.514	188.25	328.192	303.792
295.185	243.088	392.714	338.846		398.954	368.064	362.697	328.231	343.254	326.716	333.544	353.597		302.714	258.72	452.884	190.383	354.704	409.812	390.601	300.158	261.687	416.707	266.612	354.738	624.304	280.345	373.352	301.888	398.659	314.408		311.422	270.308	349.06	315.077	367.31	291.738	358.514	296.432	313.419	279.433	402.17	256.84	381.124	396.896	170.515	330.309	320.217
274.845	295.939	363.765	357.961		423.083	361.188	365.581	266.087	335.159	348.216	360.184	390.056		289.253	293.196	657.115	229.374	398.593	408.338	329.753	270.693	273.562	365.21	264.209	333.517	625.106	268.745	282.712	245.758	410.476	290.837		271.506	322.573	345.835	302.857	369.383	342.17	375.308	317.048	300.993	271.121	367.566	271.158	379.243	402.175	272.823	299.644	305.958
292.702	326.691	324.889	407.906		343.722	312.474	327.81	358.192	373.153		364.508	326.661		269.705	309.185	898.712	277.086	402.481	419.041	353.495	362.325	263.37	416.337	269.001	311.143	565.472	377.605	276.953	261.784	363.577	282.825		208.326	283.105	338.239	390.877	311.785	308.031	353.403	501.195	303.555	258.748	386.296	277.997	375.723	396.031	265.479	290.466	323.309
293.27		339.876	411.944		377.25	347.435		363.744	367.169		348.479	361.164		327.343	310.867	903.946	219.304	395.542	415.549	352.134	294.59	280.531	395.674	278.981	311.168	413.896	333.082	392.202	248.937	311.331	266.505		200.857	262.806	314.109		341.55	378.326	296.178	578.606	319.067	267.911	229.501	276.629	396.824	414.167	259.571	325.188	321.444
297.53		371.53	449.88		365.353	381.077		336.488	350.456		328.549	339.797		271.869	297.663		165.263	334.834	432.384	314.418	349.224	274.595	376.5	293.944		539.458	323.593	359.814	336.882	294.694	306.286		231.487	251.33	324.368		287.576	323.958	339.769		294.27	264.356	203.606	273.047	340.153	418.948	316.524	341.234	359.362
327.406		329.648	362.97		353.667	357.866		322.277	338.4		340.785	367.072		302.944	300.479		217.812	348.336	379.211	369.441		260.369	318.779	287.886		559.078	286.51		339.502	290.873			206.162	262.201	343.303		265.947	342.548	314.619		313.27	274.17	148.912	300.092	413.03	362.273	304.98		360.915
316.903		379.228	431.454		379.713	423.295		328.551			372.649	325.847		280.58	309.953		219.067		359.68	384.141		228.416	369.845	279.877		550.056	284.178		248.454	293.9			204.79	295.698	341.527			274.814	327.085		330.971	302.595		299.753	387.217	395.782	294.97		334.581
327.87		376.849	365.436		355.803	417.09		282.522			397.721	310.777		302.976	328.632		239.691		356.399	307.717			342.596	282.841		549.158	286.85		260.787	265.442			216.116	248.826	258.55				325.458		295.701	270.772		302.328	404.581	425.68	321.92		307.963
		388.701	325.309		331.74	445.582		363.037			429.229	401.502		278.672	331.614				297.601	288.832			328.034	311.853		491.696			281.269	222.712			248.051	240.04	250.367				342.14		306.994	362.32		386.182	325.831		283.145		344.021
		342.81	277.374		338.974	381.246		357.314			411.259	360.494		302.485					219.923	333.072			282.607			488.288			279.686	314.299			246.924	300.151	339.674				406.885		372.326			331.615	281.887				315.871
		385.511	319.851		377.863	414.115		346.736			369.439	283.709		176.583					224.734	276.412			318.739			557.668			316.55	312.34			258.615		339.362				381.653		349.816			338.209	301.502				382.015
		361.47	323.436		349.451			332.126			432.994	335.673		164.338						308.27			311.44			549.125			336.176	313.111			245.682		329.721				203.506		369.19				228.617				242.459
			275.295		390.47			347.417			422.303			210.631						299.034						545.16			369.368	299.212			239.844		356.713						318.633
														243.797						358.431						535.819			378.721	285.404					191.73						344.388
																										503.528			277.732	310.897											379.652
																										448.516			190.382	338.575											409.898
																										258.519			209.125	325.868											459.808
																										392.005				275.019											421.836
																										406.25				241.427
																										430.745
30	25	34	35	20	35	33	25	35	28	24	35	34	15	36	31	26	30	28	33	36	27	29	34	31	26	42	30	27	39	41	27	17	35	32	36	25	28	29	34	26	40	31	28	33	34	30	31	27	34
[truncated: 13 more columns]
