# Supplementary material for: Overexpression of Ssd1 and calorie restriction extend yeast replicative lifespan by preventing deleterious age-dependent iron uptake
Source: eLife. 2026 Jan 12;14:RP108892. doi: 10.7554/eLife.108892 (PMC12795504; doi:10.7554/eLife.108892)
Supplement: Figure 2—source data 1. [file elife-108892-fig2-data1.xlsx]

## Sheet: 2A-Cell Cycle
0	0	0	0	0	0	0	0	0	0	0	0	0	0	0	0	0	0	0	0	0	0	0	0	0	0	0	0	0	0	0	0	0	0	0	0	0	0	0	0	0	0	0	0	0	0	0	0	0	0
0	0	0	0	0	0	0	0	0	0	0	0	0	0	0	0	0	0	0	0	0	0	0	0	0	0	0	0	0	0	0	0	0	0	0	0	0	0	0	0	0	0	0	0	0	0	0	0	0	0
0	0	0	0	0	0	0	0	0	0	0	0	0	0	0	0	0	0	0	0	0	0	0	0	0	0	0	0	0	0	0	0	0	0	0	0	0	0	0	0	0	0	0	0	G2/M	0	0	0	0	G2/M
0	0	0	0	0	0	0	0	0	G2/M	G2/M	0	0	G2/M	0	G2/M	0	0	0	0	0	G2/M	0	0	0	0	0	0	0	0	0	0	G2/M	0	0	0	0	0	0	0	0	G2/M	0	0	0	0	0	0	0	0
0	0	0	0	0	0	0	0	0	0	0	G2/M	0	G2/M	0	0	0	0	0	0	0	0	0	0	0	G2/M	0	0	0	0	G2/M	0	G2/M	G2/M	0	0	G2/M	G2/M	G2/M	G2/M	0	0	G2/M	0	0	G2/M	G2/M	G2/M	0	G2/M
0	G2/M	0	0	G2/M	0	0	0	0	0	G2/M	0	0	G2/M	0	0	0	0	0	0	G2/M	0	0	0	G2/M	0	0	0	G2/M	0	0	0	0	0	0	0	0	0	0	0	0	0	0	G2/M	0	0	G2/M	0	0	0
0	G2/M	0	0	G2/M	0	0	G2/M	0	0	0	G2/M	G2/M	0	0	0	0	0	0	0	0	G2/M	0	0	G2/M	0	0	0	G2/M	0	0	0	0	0	0	0	G2/M	G2/M	0	0	0	0	G2/M	0	0	G2/M	0	0	G2/M	G2/M
G2/M	0	0	0	0	0	G2/M	0	0	G2/M	0	0	0	G2/M	0	0	0	0	G2/M	0	0	0	0	0	0	G2/M	0	0	0	0	0	0	G2/M	0	0	0	0	0	G2/M	0	0	G2/M	G2/M	0	G2/M	0	G2/M	0	0	0
G2/M	0	0	0	G2/M	0	0	0	0	0	0	G2/M	0	G2/M	0	0	0	0	0	0	0	S	0	G2/M	0	0	G2/M	0	0	G2/M	0	0	0	0	0	0	G2/M	0	0	G2/M	0	G2/M	G2/M	0	G2/M	0	G2/M	0	G2/M	0
0	0	0	G2/M	0	G2/M	0	0	0	G2/M	G2/M	0	G2/M	G2/M	0	0	0	G2/M	0	G2/M	0	0	0	0	G2/M	S	0	G2/M	0	0	G2/M	0	0	G2/M	G2/M	0	0	G2/M	G2/M	0	G2/M	G2/M	0	0	G2/M	0	0	0	G2/M	0
0	0	0	G2/M	G2/M	0	G2/M	G2/M	0	0	S	G2/M	0	0	0	G2/M	0	G2/M	0	0	0	0	G2/M	0	0	0	0	0	0	G2/M	0	G2/M	0	0	0	G2/M	G2/M	0	0	G2/M	0	0	G2/M	G2/M	0	0	0	G2/M	G2/M	0
0	0	0	G2/M	0	G2/M	0	0	G2/M	G2/M	G2/M	0	0	0	G2/M	0	0	0	0	G2/M	0	G2/M	0	0	0	0	0	0	0	0	G2/M	0	0	G2/M	G2/M	0	G2/M	G2/M	G2/M	G2/M	0	0	G2/M	0	G2/M	0	G2/M	0	G2/M	G2/M
G2/M	G2/M	0	G2/M	G2/M	0	0	0	0	G2/M	0	G2/M	0	G2/M	0	0	0	G2/M	0	0	G2/M	0	0	G2/M	0	0	0	G2/M	G2/M	G2/M	G2/M	0	G2/M	G2/M	0	0	0	0	0	G2/M	0	0	G2/M	0	G2/M	0	0	G2/M	0	0
0	0	0	0	S	G2/M	0	0	G2/M	G2/M	0	0	0	G2/M	0	0	0	0	G2/M	G2/M	0	0	0	0	0	G2/M	G2/M	0	G2/M	0	G2/M	G2/M	G2/M	0	G2/M	G2/M	G2/M	0	S	0	0	G2/M	0	0	G2/M	G2/M	G2/M	0	G2/M	G2/M
G2/M	G2/M	0	0	0	G2/M	0	S	0	0	G2/M	G2/M	0	G1	G2/M	G2/M	0	0	G2/M	0	G2/M	0	G2/M	0	G2/M	G2/M	0	G2/M	0	0	G2/M	G2/M	G2/M	0	0	G2/M	0	G2/M	0	G2/M	0	0	G2/M	0	G2/M	0	0	0	G2/M	G2/M
G2/M	0	G2/M	0	0	0	0	G2/M	G2/M	G2/M	0	0	G2/M		0	G2/M	G2/M	0	0	G2/M	0	0	0	0	0	0	G2/M	0	0	G2/M	0	0	G2/M	G2/M	G2/M	0	0	0	0	0	0	0	0	G2/M	G2/M	G2/M	G2/M	0	G2/M	G2/M
0	G2/M	0	G2/M	0	G2/M	0	G2/M	0	G2/M	0	0	0		0	0	0	G2/M	G2/M	G2/M	G2/M	0	G1	0	G2/M	G2/M	0	0	G2/M	0	0	S	G2/M	G2/M	G2/M	G2/M	G2/M	0	0	G1	0	G2/M	G2/M	G2/M	0	G2/M	0	0	G2/M	S
G2/M	G2/M	0	G2/M	0	G2/M	0	G2/M	0	G2/M	0	G2/M	G2/M		0	G2/M	0	G2/M	G2/M	G2/M	0	G2/M	0	0	0	G2/M	G2/M	G2/M	0	0	0	0		0	0	G2/M	G2/M	G2/M	G2/M	G2/M	0	0	G2/M	G2/M	G2/M	0	G2/M	0	0	0
G2/M	0	G2/M	G2/M	G2/M	0	0	0	0	0	0	G2/M	G2/M		G2/M	0	0	G2/M	0	G2/M	0	G2/M	G2/M	0	G2/M	0	0	0	0	G2/M	0	0		0	0	G2/M	G2/M	G2/M	G2/M	G2/M	0	G2/M	0	G2/M	G2/M	G2/M	G2/M	0	0	0
G2/M	G2/M	0	0	G1	G2/M	S	0	G2/M	G2/M	0	0	0		0	G2/M	0	0	G2/M	0	G2/M	0	0	G2/M	G2/M	0	0	G2/M	G2/M	0	G2/M	0		0	0	G2/M	0	G2/M	0	G2/M	0	0	G2/M	0	0	G2/M	0	0	0	G2/M
0	0	0	G2/M		0	G2/M	0	0	G1	G2/M	0	G2/M		G2/M	G2/M	G2/M	0	0	0	G1	G2/M	G2/M	G2/M	0	0	G2/M	G2/M	0	G2/M	0	0		0	G2/M	G2/M	G2/M	G2/M	G2/M	G1	0	0	0	0	0	G2/M	0	0	G2/M	G2/M
0	G2/M	0	0		0	G2/M	G2/M	G2/M	0	G2/M	G2/M	G2/M		0	0	G2/M	G2/M	G2/M	G2/M	0	0	0	0	0	0	G2/M	0	0	0	G2/M	0		G2/M	0	0	0	G2/M	G2/M	G2/M	0	G2/M	G2/M	0	0	0	0	G2/M	G1	G2/M
0	0	0	G2/M		G2/M	G2/M	0	G2/M	0	0	0	G2/M		0	0	G2/M	0	0	G2/M	0	G2/M	0	G2/M	G2/M	0	0	0	G2/M	G2/M	G2/M	0		0	0	G2/M	G2/M	0	G2/M	0	G2/M	G2/M	G2/M	G2/M	0	0	G2/M	G2/M	0	0
G2/M	G2/M	0	0		0	G2/M	G2/M	0	0	0	0	0		G2/M	G2/M	G2/M	0	G2/M	0	G2/M	0	G2/M	0	0	G2/M	0	G2/M	S	0	G2/M	G2/M		G2/M	0	G1	G1	0	0	G2/M	G2/M	G2/M	0	G2/M	0	G2/M	G2/M	G2/M	0	0
G2/M	G1	G2/M	G2/M		0	G2/M	G2/M	G1	0		0	0		0	0	G2/M	G2/M	G2/M	G2/M	0	0	0	G2/M	0	G2/M	G2/M	0	0	G2/M	0	G2/M		0	0	G2/M	S	0	0	G2/M	G2/M	0	0	G1	0	0	G2/M	G2/M	0	0
G2/M		0	G2/M		0	G2/M		0	0		0	G2/M		G2/M	G2/M	G2/M	0	G2/M	G2/M	0	G1	G2/M	G2/M	G2/M	G1	G2/M	G2/M	G2/M	G2/M	G2/M	G2/M		0	G2/M	G1		0	G2/M	0	5	G2/M	0	G2/M	G2/M	G2/M	0	G2/M	G2/M	G2/M
G2/M		G2/M	G2/M		G2/M	0		G2/M	G2/M		0	G2/M		0	G2/M		G2/M	G2/M	G2/M	G1	G2/M	0	G2/M	G2/M		0	G2/M	G2/M	0	0	S		G2/M	0	0		0	G2/M	G2/M		G2/M	0	G2/M	0	G2/M	G2/M	G2/M	G2/M	0
S		S	G2/M		G2/M	0		0	0		G2/M	G2/M		G2/M	G2/M		0	0	0	0		G1	G2/M	0		0	0		G1	G2/M			G1	G2/M	G2/M		0	G2/M	0		G1	G2/M	0	G2/M	G2/M	G2/M	G2/M		G2/M
0		G2/M	0		0	0		G2/M			0	0		0	S		G2/M		0	0		G1	G2/M	G2/M		0	G2/M		0	0			0	G2/M	0			G2/M	G2/M		0	G2/M		G2/M	0	G2/M	G2/M		G2/M
G2/M		G2/M	G2/M		0	G2/M		G2/M			G2/M	G2/M		0	G2/M		G2/M		G2/M	G2/M			G2/M	G2/M		G2/M	0		G2/M	G2/M			G2/M	G2/M	G2/M				G2/M		G2/M	G2/M		G2/M	0	G2/M	G2/M		G1
		0	G2/M		G1	G2/M		0			G2/M	G2/M		G2/M					G2/M	0			0	G2/M		0			0	0			G2/M	G2/M	G2/M				G2/M		0	G2/M		0	0		S		G2/M
		G2/M	G2/M		G2/M	G2/M		G2/M			S	G2/M		0					G2/M	G2/M			G2/M			0			G2/M	0			G2/M	G1	G2/M				S		0			G2/M	G2/M				G2/M
		G1	G2/M		G2/M	S		G2/M			0	G2/M		G2/M					0	0			G2/M			G2/M			G2/M	G2/M			G2/M		G2/M				G1		G1			G2/M	G2/M				G2/M
		G1	G2/M		G2/M			G2/M			G2/M	G2/M		0						G2/M			0			G2/M			G2/M	G2/M			G2/M		G1				G2/M		G2/M				S				G1
			G1		S			G2/M			G2/M			G2/M						0						G2/M			G2/M	0			4		0						0
														G2/M						G2/M						G2/M			G2/M	0					0						G2/M
																										0			G2/M	G2/M											G2/M
																										0			G2/M	G2/M											G2/M
																										G2/M			G2/M	G2/M											G2/M
																										0				G2/M											G2/M
																										G2/M				S
																										G1
[truncated: 13 more columns]

## Sheet: 2A-Foci_Cytokinesis
0	0	0	0	0	0	0	0	0	0	0	0	0	0	0	0	0	0	0	0	0	0	0	0	0	0	0	0	0	0	0	0	0	0	0	0	0	0	0	0	0	0	0	0	0	0	0	0	0	0
0	0	0	0	0	0	0	0	0	0	0	0	0	0	0	0	0	0	0	0	0	0	0	0	0	0	0	0	0	0	0	0	0	0	0	0	0	0	0	0	0	0	0	0	0	0	0	0	0	0
0	0	0	0	0	0	0	0	0	0	0	0	0	0	0	0	0	0	0	0	0	0	0	Dissolved	0	0	0	0	0	0	0	0	0	0	0	0	0	0	0	0	0	0	0	Dissolved	0	0	0	0	0	Dissolved
Dissolved	0	Dissolved	0	0	0	0	Dissolved	0	0	0	0	0	0	0	Dissolved	0	0	0	Dissolved	0	0	0	Dissolved	0	0	0	0	Dissolved	0	0	0	0	0	0	0	0	0	0	0	0	0	0	0	0	0	0	0	0	0
Dissolved	0	Dissolved	Dissolved	0	0	Dissolved	0	0	0	Dissolved	0	0	Dissolved	0	0	0	0	0	0	0	Dissolved	0	0	Dissolved	0	Dissolved	0	0	0	0	Dissolved	0	0	0	Dissolved	Dissolved	Dissolved	0	0	0	0	0	0	0	0	0	Dissolved	Dissolved	Dissolved
Dissolved	Dissolved	0	0	Dissolved	0	Dissolved	Dissolved	Dissolved	0	0	0	0	0	0	0	Dissolved	0	0	0	0	0	Dissolved	0	0	0	0	0	0	0	0	Dissolved	0	0	Dissolved	0	0	Dissolved	0	0	0	0	0	0	0	0	0	0	0	0
0	0	0	Dissolved	Dissolved	0	0	0	Dissolved	Dissolved	Dissolved	0	0	0	0	Dissolved	Dissolved	0	Dissolved	0	0	Dissolved	0	Dissolved	0	0	0	0	0	0	0	0	0	Dissolved	Dissolved	Dissolved	0	0	0	0	0	0	0	0	0	Dissolved	0	0	Dissolved	Dissolved
Dissolved	0	Dissolved	Dissolved	0	0	0	0	0	0	0	0	0	Dissolved	0	0	0	0	0	Dissolved	Dissolved	0	0	0	0	0	Dissolved	Dissolved	0	0	0	Dissolved	0	0	0	Dissolved	0	0	Dissolved	0	0	Dissolved	0	Dissolved	0	0	0	0	0	0
Dissolved	0	0	0	Dissolved	0	Dissolved	0	0	0	Dissolved	0	0	0	0	Dissolved	0	0	Dissolved	0	0	0	0	0	0	0	0	Dissolved	0	0	0	Dissolved	0	Dissolved	0	Dissolved	0	0	Dissolved	0	0	0	0	Dissolved	0	0	Dissolved	Dissolved	0	0
Dissolved	0	0	0	0	Dissolved	0	Dissolved	0	0	0	0	0	Dissolved	Dissolved	0	0	0	Dissolved	Dissolved	0	Dissolved	0	0	0	0	Dissolved	0	0	Dissolved	Dissolved	0	0	Dissolved	Dissolved	0	0	0	0	0	Dissolved	0	Dissolved	Dissolved	0	Dissolved	0	0	0	0
0	0	0	Dissolved	Dissolved	Dissolved	0	Dissolved	0	Dissolved	Dissolved	Dissolved	0	0	0	0	0	Dissolved	Dissolved	0	0	0	Dissolved	0	0	Dissolved	0	0	Dissolved	Dissolved	0	0	Dissolved	0	0	Dissolved	Dissolved	Dissolved	0	Dissolved	0	Dissolved	0	0	0	0	0	Dissolved	0	0
0	0	0	Dissolved	0	Dissolved	Dissolved	Dissolved	0	0	Dissolved	0	0	0	0	Dissolved	0	0	Dissolved	Dissolved	0	Dissolved	0	Dissolved	0	0	Dissolved	0	0	0	0	Dissolved	Dissolved	0	0	Dissolved	0	Dissolved	0	0	Dissolved	0	Dissolved	Dissolved	0	0	0	Dissolved	0	Dissolved
Dissolved	Dissolved	Dissolved	0	Dissolved	Dissolved	Dissolved	0	Dissolved	0	0	0	0	0	0	0	Dissolved	0	0	Dissolved	0	0	0	0	0	0	0	Dissolved	0	Dissolved	Dissolved	0	0	Dissolved	0	Dissolved	Dissolved	Dissolved	Dissolved	Dissolved	0	0	0	Dissolved	0	0	Dissolved	Dissolved	0	0
Dissolved	Dissolved	Dissolved	Dissolved	Dissolved	Dissolved	0	0	0	0	Dissolved	0	0	Dissolved	0	0	Dissolved	Dissolved	Dissolved	Dissolved	Dissolved	0	0	0	0	0	Dissolved	0	0	0	0	Dissolved	Dissolved	0	0	0	0	0	Dissolved	0	Dissolved	0	Dissolved	Dissolved	0	0	0	0	Dissolved	Dissolved
Dissolved	Dissolved	Dissolved	Dissolved	0	0	Dissolved	Dissolved	Dissolved	Dissolved	0	0	0	Dissolved	0	0	0	Dissolved	Dissolved	0	Dissolved	Dissolved	0	Dissolved	Dissolved	Dissolved	0	Dissolved	Dissolved	0	Dissolved	0	0	0	Dissolved	Dissolved	0	0	Dissolved	0	0	0	0	Dissolved	0	0	0	Dissolved	0	Dissolved
	Dissolved	Dissolved	Dissolved	0	Dissolved	Dissolved	0	0	Dissolved	0	Dissolved	Dissolved	0	0	0	0	0	Dissolved	Dissolved	0	0	Dissolved	0	0	0	0	Dissolved	Dissolved	0	0	Dissolved	Dissolved	0	0	0	0	0	Dissolved	Dissolved	Dissolved	0	Dissolved	Dissolved	Dissolved	Dissolved	0	0	Dissolved	Dissolved
		Dissolved	0	0	Dissolved	Dissolved	0	Dissolved	Dissolved	Dissolved	0	0	Dissolved	0	0	Dissolved	Dissolved	Dissolved	Dissolved	Dissolved	0	Dissolved	Dissolved	Dissolved	Dissolved	0	0	0	Dissolved	0	0	Dissolved	0	Dissolved	Dissolved	0	0	Dissolved	Dissolved	Dissolved	0	Dissolved	0	0	0	0	Dissolved	Dissolved	Dissolved
			Persistent	0	Dissolved	0	0	Dissolved	Dissolved	Dissolved	Dissolved	0	Dissolved	0	Dissolved	0	0	0	Dissolved	Dissolved	Dissolved	Dissolved	Dissolved	0	0	Dissolved	Dissolved	Dissolved	Dissolved	Dissolved	Dissolved	Dissolved	0	0	Dissolved	0	0	Dissolved	Dissolved	0	0	Dissolved	Dissolved	0	Dissolved	0	Dissolved	0	0
				Dissolved	Dissolved	Dissolved	0	0	0	Dissolved	0	0	0	0	Dissolved	0	0	0	0	0	Dissolved	Dissolved	Dissolved	0	Dissolved	Dissolved	Dissolved	0	Dissolved	0	Dissolved	Dissolved	Dissolved	Dissolved	0	0	0	0	Dissolved	0	0	Dissolved	Dissolved	Dissolved	Dissolved	0	Dissolved	Dissolved	0
				Persistent	0	Dissolved	0	Dissolved	0	0	0	0	0	0	0	Dissolved	0	0	Dissolved	Dissolved	Dissolved	0	0	Dissolved	0	0	Dissolved	Dissolved	0	Dissolved	0	Dissolved	Dissolved	Dissolved	Dissolved	0	Dissolved	Dissolved	0	0	Dissolved	0	0	0	0	Dissolved	Dissolved	Dissolved	Dissolved
					0	Dissolved	Dissolved	0	0	Dissolved	Dissolved	Dissolved	0	0	Dissolved	0	0	Dissolved	Dissolved	0	Dissolved	0	0	Dissolved	Dissolved	Dissolved	0	Dissolved	0	Dissolved	0	0	Dissolved	0	0	0	0	Dissolved	0	Dissolved	Dissolved	0	0	0	Dissolved	Dissolved	0	Dissolved	Dissolved
					0	0	Dissolved	Dissolved	Dissolved	0	0	Dissolved	0	0	0	0	0	Dissolved	0	Dissolved	Dissolved	0	Dissolved	Dissolved	0	Dissolved	0	0	Dissolved	0	0	Dissolved	Dissolved	0	Dissolved	Dissolved	0	0	Dissolved	0	Dissolved	Dissolved	0	0	Dissolved	0	Dissolved	0	Dissolved
					0	Persistent	0	0	0	Dissolved	Dissolved	Dissolved	0	Dissolved	Dissolved	Dissolved	0	0	0	0	0	Dissolved	Dissolved	0	0	Dissolved	0	0	0	0	Dissolved	Dissolved	Dissolved	Dissolved	Dissolved	Dissolved	Dissolved	Dissolved	0	0	Dissolved	Dissolved	0	0	Dissolved	Dissolved	0	0	0
							0	Dissolved	Dissolved	Dissolved	0	Dissolved	Dissolved	Dissolved	0	Dissolved	Dissolved	0	0	Dissolved	0	Dissolved	Dissolved	Dissolved	Dissolved	0	Dissolved	Dissolved	0	Dissolved	Dissolved	Dissolved	0	0	0	Dissolved	Dissolved	0	0	0	Dissolved	0	0	0	0	0	Dissolved	Dissolved	0
								Persistent	Dissolved	Dissolved	Persistent	Dissolved	Dissolved	Dissolved	0	0	Dissolved	0	0	Dissolved	0	Dissolved	Dissolved	Dissolved	0	0	Dissolved	0	Dissolved	0	Dissolved	Dissolved	0	0	0	Dissolved	Dissolved	0	0	0	Dissolved	Dissolved	0	Dissolved	0	Dissolved	Dissolved	0	0
												Persistent	Dissolved	Persistent	Dissolved	Dissolved	Dissolved	Dissolved		Dissolved	0	Dissolved	Dissolved	Dissolved	Dissolved	Dissolved	Dissolved	Dissolved	0	Dissolved	0	Dissolved	0	Dissolved	0	Dissolved	Dissolved	0	0	Dissolved	Dissolved	Dissolved	Dissolved	0	Dissolved	Dissolved	0	Dissolved	Dissolved
															Persistent	Dissolved	Dissolved	Dissolved	Dissolved	Dissolved	0	Dissolved	Dissolved	Dissolved		Dissolved	Dissolved	Dissolved	Dissolved	Dissolved	Dissolved	Dissolved	Dissolved	Dissolved	0	Dissolved	Dissolved	0	0	0	0	Dissolved	0	Dissolved	Dissolved	Dissolved	Dissolved	Dissolved	0
																			0	0	0	0	Dissolved	Persistent	Dissolved	Dissolved	Dissolved	Dissolved	0	0	Dissolved	Dissolved	Dissolved	0	Dissolved	Dissolved	0	Dissolved	Dissolved	Dissolved	0	0	Dissolved	Dissolved	Dissolved	Dissolved	0	Dissolved	Dissolved
																									Persistent	Dissolved	0	Dissolved	Dissolved	Dissolved	Dissolved	Dissolved	0	Dissolved	Dissolved	Dissolved	Dissolved	Dissolved	0	Dissolved	0	0	Dissolved	Dissolved	0	Dissolved	Dissolved	0	Dissolved
																											Persistent	Dissolved	Persistent	0	Dissolved	Dissolved	0	Dissolved	Dissolved	Dissolved	Dissolved	Dissolved	Dissolved	Dissolved	Dissolved	Dissolved	Dissolved	Dissolved	Dissolved	Dissolved	Dissolved	0	Dissolved
																																		Persistent	Persistent	Persistent	Dissolved	Persistent	Persistent	Dissolved	Dissolved	Dissolved	0	0	Dissolved	0	Dissolved	0	Dissolved
																																								Dissolved	Dissolved	Dissolved	Dissolved	Dissolved	Dissolved	Dissolved	Dissolved	Dissolved	Dissolved
																																									Dissolved	0	Dissolved	Dissolved	Dissolved	Dissolved	Dissolved	Dissolved	Dissolved
																																												Persistent	Dissolved	0	Persistent	Dissolved	Persistent

63	62	61	60	59	57	57	56	52	52	52	52	49	49	49	45	45	45	45	39	39	39	39	39	39	37	37	30	30	30	30	30	30	30	24	24	24	24	24	24	23	20	20	20	14	14	14	14	14	14
[truncated: 13 more columns]

## Sheet: 2B-C
	Biological repeat 1								Sodium Azide								Sat
	Total	SSD1 Foci	EDC3 foci	Coloc	SSD1 foci % total	EDC3 foci % total	Coloc % total	Coloc as % of SSD1 foci	Total	SSD1 Foci	EDC3 foci	Coloc	SSD1 foci % total	EDC3 foci % total	Coloc % total	Coloc as % of SSD1 foci	Total	SSD1 Foci	EDC3 foci	Coloc	SSD1 foci % total	EDC3 foci % total	Coloc % total	Coloc as % of SSD1 foci
Technical repeat 1	87	1	1	0	1.14943	1.14943	0	0	49	12	17	7	24.4898	34.6939	14.2857	58.3333	329	280	287	167	85.1064	87.234	50.7599	59.6429
Technical repeat 2	43	0	1	0	0	2.32558	0	#DIV/0!	72	28	46	16	38.8889	63.8889	22.2222	57.1429	168	127	141	79	75.5952	83.9286	47.0238	62.2047
Technical repeat 3	44	0	2	0	0	4.54545	0	#DIV/0!	62	29	42	10	46.7742	67.7419	16.129	34.4828	157	111	131	77	70.7006	83.4395	49.0446	69.3694
					0.383142	2.67349	0	#DIV/0!					36.7176	55.4416	17.5457	49.9863					77.1341	84.8674	48.9428	63.739
					0.541844	1.40808	0	#DIV/0!					9.22621	14.7549	3.39138	10.9734					5.98094	1.68536	1.52694	4.11637
														65.8154	19.1756	45.8128
														1.92652	3.04659	11.33
	Biological repeat 2								Sodium Azide								Sat
	Total	SSD1 Foci	HSP104 foci	Coloc	SSD1 foci % total	HSP104 foci % total	Coloc % total	Coloc as % of SSD1 foci	Total	SSD1 Foci	HSP104 foci	Coloc	SSD1 foci % total	HSP104 foci % total	Coloc % total	Coloc as % of SSD1 foci	Total	SSD1 Foci	HSP104 foci	Coloc	SSD1 foci % total	HSP104 foci % total	Coloc % total	Coloc as % of SSD1 foci
Technical repeat 1	96	1	4	0	1.04167	4.16667	0	0	59	19	13	2	32.2034	22.0339	3.38983	10.5263	170	120	2	0	70.5882	1.17647	0	0
Technical repeat 2	103	2	6	0	1.94175	5.82524	0	0	49	20	10	2	40.8163	20.4082	4.08163	10	145	99	2	0	68.2759	1.37931	0	0
Technical repeat 3	103	3	5	0	2.91262	4.85437	0	0	24	10	9	0	41.6667	37.5	0	0	160	131	3	0	81.875	1.875	0	0
					1.96535	4.94876	0	0					38.2288	26.6474	2.49049	6.84211					73.5797	1.47693	0	0
					0.763996	0.680392	0	0					4.27472	7.70263	1.78354	4.84287					5.94114	0.293408	0	0
	Biological repeat 3								Sodium Azide								Sat
	Total	SSD1 Foci	PAB1 foci	Coloc	SSD1 foci % total	PAB1 foci % total	Coloc % total	Coloc as % of SSD1 foci	Total	SSD1 Foci	PAB1 foci	Coloc	SSD1 foci % total	PAB1 foci % total	Coloc % total	Coloc as % of SSD1 foci	Total	SSD1 Foci	PAB1 foci	Coloc	SSD1 foci % total	PAB1 foci % total	Coloc % total	Coloc as % of SSD1 foci
Technical repeat 1	54	2	0	0	3.7037	0	0	0	50	25	0	0	50	0	0	0	156	125	72	64	80.1282	46.1538	41.0256	51.2
Technical repeat 2	92	1	1	0	1.08696	1.08696	0	0	39	22	0	0	56.4103	0	0	0	154	114	70	58	74.026	45.4545	37.6623	50.8772
Technical repeat 3	59	1	0	0	1.69492	0	0	0	45	23	0	0	51.1111	0	0	0	165	101	73	59	61.2121	44.2424	35.7576	58.4158
					2.16186	0.362319	0	0					52.5071	0	0	0					71.7888	45.2836	38.1485	53.4977
					1.11814	0.512396	0	0					2.79696	0	0	0					7.88282	0.789641	2.17798	3.48016
	681				1.50345				449				42.4845				1604				74.1675
					0.796228								7.11386								2.22145
