# Supplementary material for: Overexpression of Ssd1 and calorie restriction extend yeast replicative lifespan by preventing deleterious age-dependent iron uptake
Source: eLife. 2026 Jan 12;14:RP108892. doi: 10.7554/eLife.108892 (PMC12795504; doi:10.7554/eLife.108892)
Supplement: Figure 3—source data 1. [file elife-108892-fig3-data1.xlsx]

## Sheet: 3A
WT	strain 1 censored	OE-SSD1	strain 2 censored	WT CR	strain 3 censored	OE-SSD1 CR	strain 4 censored	%	WT
23	23	32	19	19	20	33	20	1	0	0
19	14	29	19	22	27	31	18	2	0	0
17	18	29	25	32	18	28	21	3	0	0
13	17	28	20	24	28	25	20	4	0	0
12	19	28	22	17	24	25	21	5	0	0
23	21	28	14	25	15	24	22	6	0	0
18	22	26	15	20	18	21	17	7	0	0
16	17	25	18	25		20	17	8	0	0
19	12	25	25	23		20	22	9	0	0
21	20	23	16	27		19	27	10	0	0
27	15	23	23	24		18	20	11	0	0
19	14	22	21	26		15	19	12	3	1
22	18	22	17	28				13	2	0
12	20	22	18	21				14	1	2
17	16	21	24	26				15	3	1
25	19	21	14	13				16	2	1
19		20	22	23				17	6	2
19		20	18	25				18	3	2
21		20	20	26				19	6	2
15		19	22	15				20	2	2
16		18	28	23				21	3	1
18		17	17					22	2	1
12		16	15					23	3	1
17		13	19					24	0	0
20								25	1	0
18								26	0	0
21								27	1	0
17								28	0	0
22								29	0	0
15								30	0	0
17								31	0	0
20								32	0	0
13								33	0	0
23								34	0	0
17								35	0	0
14								%	OE-SSD1
15								1	0	0
19								2	0	0
								3	0	0
								4	0	0
								5	0	0
								6	0	0
								7	0	0
								8	0	0
								9	0	0
								10	0	0
								11	0	0
								12	0	0
								13	1	0
								14	0	2
								15	0	2
								16	1	1
								17	1	2
								18	1	3
								19	1	3
								20	3	2
								21	2	1
								22	3	3
								23	2	1
								24	0	1
								25	2	2
								26	1	0
								27	0	0
								28	3	1
								29	2	0
								30	0	0
								31	0	0
								32	1	0
								33	0	0
								34	0	0
								35	0	0
								%	WT CR
								1	0	0
								2	0	0
								3	0	0
								4	0	0
								5	0	0
								6	0	0
								7	0	0
								8	0	0
								9	0	0
								10	0	0
								11	0	0
								12	0	0
								13	1	0
								14	0	0
								15	1	1
								16	0	0
								17	1	0
								18	0	2
								19	1	0
								20	1	1
								21	1	0
								22	1	0
								23	3	0
								24	2	1
								25	3	0
								26	3	0
								27	1	1
								28	1	1
								29	0	0
								30	0	0
								31	0	0
								32	1	0
								33	0	0
								34	0	0
								35	0	0
								%	OE-SSD1 CR
								1	0	0
								2	0	0
								3	0	0
								4	0	0
								5	0	0
								6	0	0
								7	0	0
								8	0	0
								9	0	0
								10	0	0
								11	0	0
								12	0	0
								13	0	0
								14	0	0
								15	1	0
								16	0	0
								17	0	2
								18	1	1
								19	1	1
								20	2	3
								21	1	2
								22	0	2
								23	0	0
								24	1	0
								25	2	0
								26	0	0
								27	0	1
								28	1	0
								29	0	0
								30	0	0
								31	1	0
								32	0	0
								33	1	0
								34	0	0
								35	0	0

## Sheet: 3B
WT	strain 1 censored	WT 10mM Fe	strain 2 censored	OE-SSD1	strain 4 censored	OE-SSD1 10mM	strain 1 censored	CR	strain 1 censored	CR 10 uM	strain 2 censored
24	22	30	14	30	18	33	12	22	26	35	23
18	17	15	15	29	24	15	18	26	24	19	26
15	12	25	14	19	23	29	19	22	19	24	21
21	15	18	24	26	24	20	12	26	25	25	23
28	25	18		17	16	19	21	34	21	28	26
25	17	18		26	17	26	21	25	25	31	20
17	16	15		23	20	27	24	27	29	17	22
30	17	15		14	23	30	20	33	19	34	22
20	12	17		15	16	22	14	27	25	33	22
16	18	23		32	23	25	21	29	28	22	19
29	16	15		17	20	20	16	34	25	29	26
19	23	14		13	21	33	19	33	27	29	17
16	15	9		22	14	30	12	26	28	28	23
18	11	12		30	14	27	14	23	27	18	21
22	16	15		29	13	25	23	23	26	30	24
23	22	16		27	28	21	16	25	23	34	17
21	21	28		15	13	30	19	29	22	30	27
16	13	25		23	15	20	12	28	19	25	25
24	24	17		25	17	25	23	29		29
24	25	13		24	16	28	28			27
22	19	11		21	21	27	29			16
16	26	15		27	23	28	19			30
23	12	9		32	18	31	21			29
26	11	20		29	26	23	24			19
17	12	16		30	24	27	22			19
27	19	8		34	23	22	26			27
15	16	15		24	19	30	28			28
14	16	16		32	14	26	24			25
13	19	10		23	17	19	22			30
21	18			26	27	29	25			32
21	12			31	20		21			22
22	25			28	19		25			32
23	23			20	23		25
11	17			30	21		27
19	25			26	26		29
22	22			30	22		26
15	12			32	24		23
14	15			26	21		22
11				29	26		25
					25		29
					18		25
					19
					21
					26
					25
					24
					25
					22
					19
					26
					22

## Sheet: 3C
WT	censored	SSD1	censored	CR	censored	WT BPS	censored	SSD1 BPS	censored	CR BPS	censored
24	22	29	27	27	25	17	15	8		7
18	16	31	30	27	25	20	22	7		6
24	17	18	22	28	24	22	21	7		11
17	15	21	18	30	27	15	18	7		9
27	18	29	24	29	23	15	25	8		3
19	20	22	17	18	22	18	21	6		7
14	13	25	17	29	27	10	17	7		10
20	24	33	26	31	14	28	14	8		9
12	17	29	26	21	20	22	16	7		6
15	12	31	23	31	27	29	17	5		5
13	21	21	24	27	18	23	17	3		9
26	14	18	23	25	18	24	13	8		4
20	26	23	17	30	19	30	22	8		7
25	21	23	25	26	19	24	22	7		10
17	23	30	24	23	25	20	15	4		5
19	21	32	16	32	22	23		5		8
25	24	18	18	25	21	22		5		5
21	24	24	25	19		18		3		7
18	26	27	28	28		20		6		4
23		32	19	31		16		6		4
16		33	17	26		24		6		8
13		31	21	22		18		4		6
19		33	24	25		20		6		6
23		27	25	31		21		6		5
28		25	17	24		23		8		10
20		27	28	21				5		8
22		34	31	27				6		7
30		19	24					6		9
19		18	26					4		5
17		21						8		8
12		30						5		9
19								6		6
28								5		7
								4		7
										10
										9
										7
										10
										6
										12
										5
										8
										6
										6
										7
										6
										6
										8
										7
										6
										7
										6
										5
