# Supplementary material for: Overexpression of Ssd1 and calorie restriction extend yeast replicative lifespan by preventing deleterious age-dependent iron uptake
Source: eLife. 2026 Jan 12;14:RP108892. doi: 10.7554/eLife.108892 (PMC12795504; doi:10.7554/eLife.108892)
Supplement: Figure 4—source data 1. [file elife-108892-fig4-data1.xlsx]

## Sheet: 4B-Control
Cyto	Cyto	Cyto	Cyto	Cyto	Cyto	Cyto	Cyto	Cyto	Cyto	Cyto	Cyto	Cyto	Cyto	Cyto	Cyto	Cyto	Cyto	Cyto	Cyto	Cyto	Cyto	Cyto	Cyto	Cyto	Cyto	Cyto	Cyto	Cyto	Cyto	Cyto	Cyto	Cyto	Cyto	Cyto	Cyto	Cyto	Cyto	Cyto	Cyto	Cyto	Cyto	Cyto	Cyto	Cyto	Cyto	Cyto	Cyto	Cyto	Cyto
Cyto	Cyto	Cyto	Cyto	Cyto	Cyto	Cyto	Cyto	Cyto	Cyto	Cyto	Cyto	Cyto	Cyto	Cyto	Cyto	Cyto	Cyto	Cyto	Cyto	Cyto	Cyto	Cyto	Cyto	Cyto	Cyto	Cyto	Cyto	Cyto	Cyto	Cyto	Cyto	Cyto	Cyto	Cyto	Cyto	Cyto	Cyto	Cyto	Cyto	Cyto	Cyto	Cyto	Cyto	Cyto	Cyto	Cyto	Cyto	Cyto	Cyto
Cyto	Cyto	Cyto	Cyto	Cyto	Cyto	Cyto	Cyto	Nuclear	Cyto	Cyto	Cyto	Cyto	Cyto	Cyto	Cyto	Cyto	Cyto	Cyto	Cyto	Cyto	Cyto	Cyto	Cyto	Cyto	Cyto	Cyto	Cyto	Cyto	Cyto	Cyto	Cyto	Cyto	Cyto	Cyto	Cyto	Cyto	Cyto	Cyto	Cyto	Cyto	Cyto	Cyto	Cyto	Cyto	Cyto	Cyto	Cyto	Cyto	Cyto
Cyto	Cyto	Nuclear	Cyto	Cyto	Cyto	Cyto	Cyto	Nuclear	Cyto	Cyto	Cyto	Cyto	Cyto	Cyto	Cyto	Cyto	Cyto	Cyto	Cyto	Cyto	Cyto	Cyto	Cyto	Cyto	Cyto	Cyto	Cyto	Cyto	Cyto	Cyto	Cyto	Cyto	Cyto	Cyto	Cyto	Cyto	Cyto	Cyto	Cyto	Cyto	Cyto	Cyto	Cyto	Cyto	Cyto	Cyto	Cyto	Cyto	Cyto
Cyto	Cyto	Nuclear	Cyto	Cyto	Cyto	Cyto	Cyto	Nuclear	Cyto	Cyto	Cyto	Cyto	Cyto	Nuclear	Cyto	Cyto	Cyto	Cyto	Cyto	Cyto	Cyto	Cyto	Cyto	Cyto	Cyto	Cyto	Cyto	Cyto	Cyto	Cyto	Cyto	Cyto	Cyto	Cyto	Cyto	Cyto	Cyto	Cyto	Cyto	Cyto	Cyto	Cyto	Cyto	Cyto	Cyto	Cyto	Cyto	Cyto	Cyto
Cyto	Cyto	Nuclear	Cyto	Cyto	Cyto	Nuclear	Cyto	Nuclear	Cyto	Cyto	Cyto	Cyto	Cyto	Nuclear	Cyto	Cyto	Cyto	Cyto	Cyto	Cyto	Cyto	Cyto	Cyto	Cyto	Cyto	Cyto	Cyto	Cyto	Cyto	Cyto	Cyto	Cyto	Cyto	Cyto	Cyto	Cyto	Cyto	Cyto	Cyto	Cyto	Cyto	Cyto	Cyto	Cyto	Cyto	Cyto	Cyto	Cyto	Cyto
Cyto	Nuclear	Nuclear	Cyto	Cyto	Cyto	Nuclear	Cyto	Nuclear	Cyto	Cyto	Cyto	Cyto	Cyto	Nuclear	Cyto	Cyto	Cyto	Cyto	Cyto	Cyto	Cyto	Cyto	Cyto	Cyto	Cyto	Cyto	Cyto	Cyto	Cyto	Cyto	Cyto	Cyto	Cyto	Cyto	Cyto	Cyto	Cyto	Cyto	Cyto	Cyto	Cyto	Cyto	Cyto	Cyto	Cyto	Cyto	Cyto	Cyto	Cyto
Cyto	Nuclear	Nuclear	Cyto	Cyto	Cyto	Nuclear	Cyto	Nuclear	Cyto	Cyto	Cyto	Nuclear	Cyto	Nuclear	Cyto	Nuclear	Cyto	Cyto	Cyto	Cyto	Cyto	Cyto	Cyto	Cyto	Cyto	Cyto	Cyto	Cyto	Cyto	Cyto	Cyto	Cyto	Cyto	Cyto	Cyto	Cyto	Cyto	Cyto	Cyto	Cyto	Cyto	Cyto	Cyto	Cyto	Cyto	Cyto	Cyto	Cyto	Cyto
Nuclear	Nuclear	Nuclear	Nuclear	Cyto	Cyto	Nuclear	Cyto	Nuclear	Cyto	Cyto	Cyto	Nuclear	Cyto	Nuclear	Cyto	Nuclear	Cyto	Cyto	Cyto	Cyto	Cyto	Cyto	Cyto	Cyto	Cyto	Nuclear	Cyto	Cyto	Cyto	Cyto	Cyto	Cyto	Cyto	Cyto	Cyto	Cyto	Cyto	Cyto	Cyto	Cyto	Cyto	Cyto	Cyto	Cyto	Cyto	Cyto	Cyto	Cyto	Cyto
		Nuclear	Nuclear	Nuclear	Nuclear	Nuclear	Nuclear	Nuclear	Cyto	Nuclear	Cyto	Nuclear	Cyto	Nuclear	Cyto	Nuclear	Cyto	Cyto	Cyto	Cyto	Cyto	Cyto	Cyto	Cyto	Cyto	Nuclear	Nuclear	Cyto	Cyto	Cyto	Cyto	Cyto	Cyto	Cyto	Cyto	Cyto	Cyto	Cyto	Cyto	Cyto	Cyto	Cyto	Cyto	Cyto	Cyto	Cyto	Cyto	Cyto	Cyto
			Nuclear	Nuclear	Nuclear	Nuclear	Nuclear	Nuclear	Cyto	Nuclear	Cyto	Nuclear	Nuclear	Nuclear	Cyto	Nuclear	Nuclear	Cyto	Cyto	Cyto	Cyto	Cyto	Cyto	Cyto	Cyto	Nuclear	Nuclear	Cyto	Cyto	Cyto	Nuclear	Cyto	Cyto	Cyto	Cyto	Cyto	Cyto	Cyto	Nuclear	Cyto	Cyto	Cyto	Cyto	Cyto	Cyto	Cyto	Cyto	Cyto	Cyto
						Nuclear	Nuclear	Nuclear	Cyto	Nuclear	Nuclear	Nuclear	Nuclear	Nuclear	Cyto	Nuclear	Nuclear	Cyto	Cyto	Cyto	Cyto	Cyto	Cyto	Cyto	Cyto	Nuclear	Nuclear	Cyto	Cyto	Cyto	Nuclear	Cyto	Cyto	Cyto	Cyto	Cyto	Cyto	Cyto	Nuclear	Cyto	Cyto	Cyto	Cyto	Nuclear	Cyto	Cyto	Cyto	Cyto	Cyto
									Cyto	Nuclear	Nuclear	Nuclear	Nuclear	Nuclear	Cyto	Nuclear	Nuclear	Cyto	Cyto	Cyto	Cyto	Nuclear	Cyto	Nuclear	Cyto	Nuclear	Nuclear	Cyto	Cyto	Cyto	Nuclear	Cyto	Cyto	Cyto	Cyto	Cyto	Cyto	Cyto	Nuclear	Cyto	Nuclear	Cyto	Cyto	Nuclear	Cyto	Cyto	Cyto	Cyto	Cyto
													Nuclear	Nuclear	Nuclear	Nuclear	Nuclear	Cyto	Cyto	Cyto	Cyto	Nuclear	Cyto	Nuclear	Nuclear	Nuclear	Nuclear	Cyto	Cyto	Cyto	Nuclear	Nuclear	Cyto	Cyto	Cyto	Cyto	Cyto	Nuclear	Nuclear	Cyto	Nuclear	Cyto	Cyto	Nuclear	Cyto	Cyto	Cyto	Cyto	Cyto
															Nuclear	Nuclear	Nuclear	Nuclear	Nuclear	Nuclear	Cyto	Nuclear	Nuclear	Nuclear	Nuclear	Nuclear	Nuclear	Cyto	Cyto	Cyto	Nuclear	Nuclear	Cyto	Nuclear	Nuclear	Nuclear	Cyto	Nuclear	Nuclear	Cyto	Nuclear	Cyto	Cyto	Nuclear	Cyto	Cyto	Cyto	Cyto	Cyto
																				Nuclear	Cyto	Nuclear	Nuclear	Nuclear	Nuclear	Nuclear	Nuclear	Cyto	Nuclear	Cyto	Nuclear	Nuclear	Cyto	Nuclear	Nuclear	Nuclear	Cyto	Nuclear	Nuclear	Cyto	Nuclear	Cyto	Cyto	Nuclear	Nuclear	Cyto	Cyto	Nuclear	Cyto
																								Nuclear	Nuclear	Nuclear	Nuclear	Cyto	Nuclear	Cyto	Nuclear	Nuclear	Nuclear	Nuclear	Nuclear	Nuclear	Cyto	Nuclear	Nuclear	Cyto	Nuclear	Cyto	Cyto	Nuclear	Nuclear	Cyto	Cyto	Nuclear	Cyto
																									Nuclear	Nuclear	Nuclear	Cyto	Nuclear	Cyto	Nuclear	Nuclear	Nuclear	Nuclear	Nuclear	Nuclear	Cyto	Nuclear	Nuclear	Cyto	Nuclear	Cyto	Cyto	Nuclear	Nuclear	Cyto	Nuclear	Nuclear	Cyto
																														Cyto	Nuclear	Nuclear	Nuclear	Nuclear	Nuclear	Nuclear	Cyto	Nuclear	Nuclear	Nuclear	Nuclear	Cyto	Cyto	Nuclear	Nuclear	Cyto	Nuclear	Nuclear	Nuclear
																																		Nuclear	Nuclear	Nuclear	Nuclear	Nuclear	Nuclear	Nuclear	Nuclear	Cyto	Cyto	Nuclear	Nuclear	Cyto	Nuclear	Nuclear	Nuclear
																																				Nuclear	Nuclear	Nuclear	Nuclear	Nuclear	Nuclear	Cyto	Nuclear	Nuclear	Nuclear	Cyto	Nuclear	Nuclear	Nuclear
																																									Nuclear	Cyto	Nuclear	Nuclear	Nuclear	Nuclear	Nuclear	Nuclear	Nuclear
																																										Nuclear	Nuclear	Nuclear	Nuclear	Nuclear	Nuclear	Nuclear	Nuclear
																																																Nuclear	Nuclear

#NAME?	#NAME?	#NAME?	#NAME?	#NAME?	#NAME?	#NAME?	#NAME?	#NAME?	#NAME?	#NAME?	#NAME?	#NAME?	#NAME?	#NAME?	#NAME?	#NAME?	#NAME?	#NAME?	#NAME?	#NAME?	#NAME?	#NAME?	#NAME?	#NAME?	#NAME?	#NAME?	#NAME?	#NAME?	#NAME?	#NAME?	#NAME?	#NAME?	#NAME?	#NAME?	#NAME?	#NAME?	#NAME?	#NAME?	#NAME?	#NAME?	#NAME?	#NAME?	#NAME?	#NAME?	#NAME?	#NAME?	#NAME?	#NAME?	#NAME?
#NAME?	#NAME?	#NAME?	#NAME?	#NAME?	#NAME?	#NAME?	#NAME?	#NAME?	#NAME?	#NAME?	#NAME?	#NAME?	#NAME?	#NAME?	#NAME?	#NAME?	#NAME?	#NAME?	#NAME?	#NAME?	#NAME?	#NAME?	#NAME?	#NAME?	#NAME?	#NAME?	#NAME?	#NAME?	#NAME?	#NAME?	#NAME?	#NAME?	#NAME?	#NAME?	#NAME?	#NAME?	#NAME?	#NAME?	#NAME?	#NAME?	#NAME?	#NAME?	#NAME?	#NAME?	#NAME?	#NAME?	#NAME?	#NAME?	#NAME?
[truncated: 7 more columns]

## Sheet: 4B-CR
Cyto	Cyto	Cyto	Cyto	Cyto	Cyto	Cyto	Cyto	Cyto	Cyto	Cyto	Cyto	Cyto	Cyto	Cyto	Cyto	Cyto	Cyto	Cyto	Cyto	Cyto	Cyto	Cyto	Cyto	Cyto	Cyto	Cyto	Cyto	Cyto	Cyto	Cyto	Cyto	Cyto	Cyto	Cyto	Cyto	Cyto	Cyto	Cyto	Cyto	Cyto	Cyto	Cyto	Cyto	Cyto	Cyto	Cyto	Cyto	Cyto	Cyto
Cyto	Cyto	Cyto	Cyto	Cyto	Cyto	Cyto	Cyto	Cyto	Cyto	Cyto	Cyto	Cyto	Cyto	Cyto	Cyto	Cyto	Cyto	Cyto	Cyto	Cyto	Cyto	Cyto	Cyto	Cyto	Cyto	Cyto	Cyto	Cyto	Cyto	Cyto	Cyto	Cyto	Cyto	Cyto	Cyto	Cyto	Cyto	Cyto	Cyto	Cyto	Cyto	Cyto	Cyto	Cyto	Cyto	Cyto	Cyto	Cyto	Cyto
Cyto	Cyto	Cyto	Cyto	Cyto	Cyto	Cyto	Cyto	Cyto	Cyto	Cyto	Cyto	Cyto	Cyto	Cyto	Cyto	Cyto	Cyto	Cyto	Cyto	Cyto	Cyto	Cyto	Cyto	Cyto	Cyto	Cyto	Cyto	Cyto	Cyto	Cyto	Cyto	Cyto	Cyto	Cyto	Cyto	Cyto	Cyto	Cyto	Cyto	Cyto	Cyto	Cyto	Cyto	Cyto	Cyto	Cyto	Cyto	Cyto	Cyto
Cyto	Cyto	Cyto	Cyto	Cyto	Cyto	Cyto	Cyto	Cyto	Cyto	Cyto	Cyto	Cyto	Cyto	Cyto	Cyto	Cyto	Cyto	Cyto	Cyto	Cyto	Cyto	Cyto	Cyto	Cyto	Cyto	Cyto	Cyto	Cyto	Cyto	Cyto	Cyto	Cyto	Cyto	Cyto	Cyto	Cyto	Cyto	Cyto	Cyto	Cyto	Cyto	Cyto	Cyto	Cyto	Cyto	Cyto	Cyto	Cyto	Cyto
Cyto	Cyto	Cyto	Cyto	Cyto	Cyto	Cyto	Cyto	Cyto	Cyto	Cyto	Cyto	Cyto	Cyto	Cyto	Cyto	Cyto	Cyto	Cyto	Cyto	Cyto	Cyto	Cyto	Cyto	Cyto	Cyto	Cyto	Cyto	Cyto	Cyto	Cyto	Cyto	Cyto	Cyto	Cyto	Cyto	Cyto	Cyto	Cyto	Cyto	Cyto	Cyto	Cyto	Cyto	Cyto	Cyto	Cyto	Cyto	Cyto	Cyto
Cyto	Cyto	Cyto	Cyto	Cyto	Cyto	Cyto	Cyto	Cyto	Cyto	Cyto	Cyto	Cyto	Cyto	Cyto	Cyto	Cyto	Cyto	Cyto	Cyto	Cyto	Cyto	Cyto	Cyto	Cyto	Cyto	Cyto	Cyto	Cyto	Cyto	Cyto	Cyto	Cyto	Cyto	Cyto	Cyto	Cyto	Cyto	Cyto	Cyto	Cyto	Cyto	Cyto	Cyto	Cyto	Cyto	Cyto	Cyto	Cyto	Cyto
Cyto	Cyto	Cyto	Cyto	Cyto	Cyto	Cyto	Cyto	Cyto	Cyto	Cyto	Cyto	Cyto	Cyto	Cyto	Cyto	Cyto	Cyto	Cyto	Cyto	Cyto	Cyto	Cyto	Cyto	Cyto	Cyto	Cyto	Cyto	Cyto	Cyto	Cyto	Cyto	Cyto	Cyto	Cyto	Cyto	Cyto	Cyto	Cyto	Cyto	Cyto	Cyto	Cyto	Cyto	Cyto	Cyto	Cyto	Cyto	Cyto	Cyto
Cyto	Cyto	Cyto	Cyto	Cyto	Cyto	Cyto	Cyto	Cyto	Cyto	Cyto	Cyto	Cyto	Cyto	Cyto	Cyto	Cyto	Cyto	Cyto	Cyto	Cyto	Cyto	Cyto	Cyto	Cyto	Cyto	Cyto	Cyto	Cyto	Cyto	Cyto	Cyto	Cyto	Cyto	Cyto	Cyto	Cyto	Cyto	Cyto	Cyto	Cyto	Cyto	Cyto	Cyto	Cyto	Cyto	Cyto	Cyto	Cyto	Cyto
Cyto	Cyto	Cyto	Cyto	Cyto	Cyto	Cyto	Cyto	Cyto	Cyto	Cyto	Cyto	Cyto	Cyto	Cyto	Cyto	Cyto	Cyto	Cyto	Cyto	Cyto	Cyto	Cyto	Cyto	Cyto	Cyto	Cyto	Cyto	Cyto	Cyto	Cyto	Cyto	Cyto	Cyto	Cyto	Cyto	Cyto	Cyto	Cyto	Cyto	Cyto	Cyto	Cyto	Cyto	Cyto	Cyto	Cyto	Cyto	Cyto	Cyto
Cyto	Cyto	Cyto	Cyto	Cyto	Cyto	Cyto	Cyto	Cyto	Cyto	Cyto	Cyto	Cyto	Cyto	Cyto	Cyto	Cyto	Cyto	Cyto	Cyto	Cyto	Cyto	Cyto	Cyto	Cyto	Cyto	Cyto	Cyto	Cyto	Cyto	Cyto	Cyto	Cyto	Cyto	Cyto	Cyto	Cyto	Cyto	Cyto	Cyto	Cyto	Cyto	Cyto	Cyto	Cyto	Cyto	Cyto	Cyto	Cyto	Cyto
Cyto	Cyto	Cyto	Cyto	Cyto	Cyto	Cyto	Cyto	Cyto	Cyto	Cyto	Cyto	Cyto	Cyto	Cyto	Cyto	Cyto	Cyto	Cyto	Cyto	Cyto	Cyto	Cyto	Cyto	Cyto	Cyto	Cyto	Cyto	Cyto	Cyto	Cyto	Cyto	Cyto	Cyto	Cyto	Cyto	Cyto	Cyto	Cyto	Cyto	Cyto	Cyto	Cyto	Cyto	Cyto	Cyto	Cyto	Cyto	Cyto	Cyto
Cyto	Cyto	Cyto	Cyto	Cyto	Cyto	Cyto	Cyto	Cyto	Cyto	Cyto	Cyto	Cyto	Cyto	Cyto	Cyto	Cyto	Cyto	Cyto	Cyto	Cyto	Cyto	Cyto	Cyto	Cyto	Cyto	Cyto	Cyto	Cyto	Cyto	Cyto	Cyto	Cyto	Cyto	Cyto	Cyto	Cyto	Cyto	Cyto	Cyto	Cyto	Cyto	Cyto	Cyto	Cyto	Cyto	Cyto	Cyto	Cyto	Cyto
Cyto	Cyto	Cyto	Cyto	Cyto	Cyto	Cyto	Cyto	Cyto	Cyto	Cyto	Cyto	Cyto	Cyto	Cyto	Cyto	Cyto	Cyto	Cyto	Cyto	Cyto	Cyto	Cyto	Cyto	Cyto	Cyto	Cyto	Cyto	Cyto	Cyto	Cyto	Cyto	Cyto	Cyto	Cyto	Cyto	Cyto	Cyto	Cyto	Cyto	Cyto	Cyto	Cyto	Cyto	Cyto	Cyto	Cyto	Cyto	Cyto	Cyto
Cyto	Cyto	Cyto	Cyto	Cyto	Cyto	Cyto	Cyto	Cyto	Cyto	Cyto	Cyto	Cyto	Cyto	Cyto	Cyto	Cyto	Cyto	Cyto	Cyto	Cyto	Cyto	Cyto	Cyto	Cyto	Cyto	Cyto	Cyto	Cyto	Cyto	Cyto	Cyto	Cyto	Cyto	Cyto	Cyto	Cyto	Cyto	Cyto	Cyto	Cyto	Cyto	Cyto	Cyto	Cyto	Cyto	Cyto	Cyto	Cyto	Cyto
Cyto	Cyto	Cyto	Cyto	Cyto	Cyto	Cyto	Cyto	Cyto	Cyto	Cyto	Cyto	Cyto	Cyto	Cyto	Cyto	Cyto	Cyto	Cyto	Cyto	Cyto	Cyto	Cyto	Cyto	Cyto	Cyto	Cyto	Cyto	Cyto	Cyto	Cyto	Cyto	Cyto	Cyto	Cyto	Cyto	Cyto	Cyto	Cyto	Cyto	Cyto	Cyto	Cyto	Cyto	Cyto	Cyto	Cyto	Cyto	Cyto	Cyto
Cyto	Cyto	Cyto	Cyto	Cyto	Cyto	Cyto	Cyto	Cyto	Cyto	Cyto	Cyto	Cyto	Cyto	Cyto	Cyto	Cyto	Cyto	Cyto	Cyto	Cyto	Cyto	Cyto	Cyto	Cyto	Cyto	Cyto	Cyto	Cyto	Cyto	Cyto	Cyto	Cyto	Cyto	Cyto	Cyto	Cyto	Cyto	Cyto	Cyto	Cyto	Cyto	Cyto	Cyto	Cyto	Cyto	Cyto	Cyto	Cyto	Cyto
Nuclear	Cyto	Cyto	Cyto	Cyto	Cyto	Cyto	Cyto	Cyto	Cyto	Cyto	Cyto	Cyto	Cyto	Cyto	Cyto	Cyto	Cyto	Cyto	Cyto	Cyto	Cyto	Cyto	Cyto	Cyto	Cyto	Cyto	Cyto	Cyto	Cyto	Cyto	Cyto	Cyto	Cyto	Cyto	Cyto	Cyto	Cyto	Cyto	Cyto	Cyto	Cyto	Cyto	Cyto	Cyto	Cyto	Cyto	Cyto	Cyto	Cyto
		Cyto	Cyto	Cyto	Cyto	Cyto	Cyto	Cyto	Cyto	Cyto	Cyto	Cyto	Cyto	Cyto	Cyto	Cyto	Cyto	Cyto	Cyto	Cyto	Cyto	Cyto	Cyto	Cyto	Cyto	Cyto	Cyto	Cyto	Cyto	Cyto	Cyto	Cyto	Cyto	Cyto	Cyto	Cyto	Cyto	Cyto	Cyto	Cyto	Cyto	Cyto	Cyto	Cyto	Cyto	Cyto	Cyto	Cyto	Cyto
						Nuclear	Cyto	Nuclear	Cyto	Nuclear	Cyto	Cyto	Cyto	Cyto	Cyto	Cyto	Cyto	Cyto	Cyto	Cyto	Cyto	Cyto	Cyto	Cyto	Cyto	Cyto	Cyto	Cyto	Cyto	Cyto	Cyto	Cyto	Cyto	Cyto	Cyto	Cyto	Cyto	Cyto	Cyto	Cyto	Cyto	Cyto	Cyto	Cyto	Cyto	Cyto	Cyto	Cyto	Cyto
									Cyto	Nuclear	Cyto	Cyto	Cyto	Cyto	Cyto	Cyto	Cyto	Cyto	Cyto	Cyto	Cyto	Cyto	Cyto	Cyto	Cyto	Cyto	Cyto	Cyto	Cyto	Cyto	Cyto	Cyto	Cyto	Cyto	Cyto	Cyto	Cyto	Cyto	Cyto	Cyto	Cyto	Cyto	Cyto	Cyto	Cyto	Cyto	Cyto	Cyto	Cyto
												Cyto	Cyto	Cyto	Cyto	Cyto	Cyto	Cyto	Cyto	Cyto	Cyto	Cyto	Cyto	Cyto	Cyto	Cyto	Cyto	Cyto	Cyto	Cyto	Cyto	Cyto	Cyto	Cyto	Cyto	Cyto	Cyto	Cyto	Cyto	Cyto	Cyto	Cyto	Cyto	Cyto	Cyto	Cyto	Cyto	Cyto	Cyto
														Cyto	Cyto	Cyto	Cyto	Cyto	Cyto	Cyto	Cyto	Cyto	Cyto	Cyto	Cyto	Cyto	Cyto	Cyto	Cyto	Cyto	Cyto	Cyto	Cyto	Cyto	Cyto	Cyto	Cyto	Cyto	Cyto	Cyto	Cyto	Cyto	Cyto	Cyto	Cyto	Cyto	Cyto	Cyto	Cyto
																	Cyto	Cyto	Cyto	Cyto	Nuclear	Nuclear	Cyto	Cyto	Cyto	Cyto	Cyto	Cyto	Cyto	Cyto	Cyto	Cyto	Cyto	Cyto	Cyto	Cyto	Cyto	Cyto	Cyto	Cyto	Cyto	Cyto	Cyto	Cyto	Cyto	Cyto	Cyto	Cyto	Cyto
																							Cyto	Nuclear	Cyto	Cyto	Cyto	Cyto	Nuclear	Cyto	Cyto	Cyto	Cyto	Cyto	Cyto	Cyto	Cyto	Cyto	Cyto	Cyto	Cyto	Cyto	Cyto	Cyto	Cyto	Cyto	Cyto	Cyto	Cyto
																										Cyto	Cyto	Cyto	Nuclear	Cyto	Cyto	Cyto	Cyto	Cyto	Cyto	Cyto	Cyto	Cyto	Cyto	Cyto	Cyto	Cyto	Cyto	Cyto	Cyto	Cyto	Cyto	Cyto	Cyto
																																Cyto	Cyto	Cyto	Cyto	Nuclear	Cyto	Cyto	Cyto	Cyto	Cyto	Cyto	Cyto	Cyto	Cyto	Cyto	Cyto	Cyto	Cyto
																																								Cyto	Cyto	Cyto	Cyto	Nuclear	Cyto	Cyto	Cyto	Cyto	Cyto
																																														Cyto	Cyto	Cyto	Cyto
																																																Cyto	Cyto
17	17	18	18	18	18	19	19	19	20	20	20	21	21	22	22	22	23	23	23	23	23	23	24	24	24	25	25	25	25	25	25	26	26	26	26	26	26	26	26	27	27	27	27	27	27	28	28	29	29
56	56	52	52	52	52	49	49	49	46	46	46	44	44	41	41	41	35	35	35	35	35	35	32	32	32	26	26	26	26	26	26	18	18	18	18	18	18	18	18	12	12	12	12	12	12	10	10	6	6
[truncated: 7 more columns]

## Sheet: 4C
RLS	Before	After
9	8	1
9	6	3
10	3	7
11	8	3
11	9	2
11	9	2
12	5	7
12	9	3
12	2	10
13	13	0
13	9	4
13	11	2
13	7	6
14	10	4
14	4	10
15	13	2
15	7	8
15	10	5
15	14	1
15	14	1
16	14	2
16	16	0
16	12	4
16	14	2
17	12	5
18	13	5
18	8	10
18	9	9
18	18	0
18	15	3
19	19	0
19	10	9
19	13	6
19	16	3
20	14	6
20	14	6
21	14	7
21	19	2
21	13	8
21	10	11
21	18	3
22	12	10
23	22	1
23	20	3
23	11	12
23	15	8
23	21	2
23	17	6
24	15	9
24	18	6
25	20	5
25	17	8
26	20	6
29	25	4
29	24	5
30	21	9
30	22	8
18	13	5
		1.50131e-17

## Sheet: 4D-Control(raw)
63.49	64.229	63.643	63.214	65.233	63.734	66.09	75.683	64.243	65.597	63.438	64.53	63.711	64.357	61.919	62.867	63.229	65.639	70.882	63.87	65.216	88.067	72.05	63.977	64.699	121.463	119.699	68.084	63.365	62.894	64.163	63.44	69.169	66.111	86.018	63.949	63.72	64.046	65.3	63.161	64.612	63.408	63.07	63.646	72.048	63.009	63.366	63.93	63.131	65.127
63.431	63.487	65.024	65.205	64.459	63.614	66.699	69.695	63.493	65.846	65.108	66.605	64.076	64.206	62.669	64.191	63.548	66.076	170.14	64.479	68.025	91.005	82.62	63.642	65.757	180.93	292.447	65.131	63.737	103.051	64.5	63.226	73.404	64.387	139.201	64.199	64.93	63	66.105	64.5	64.308	63.096	62.215	62.516	75.298	63.444	63.565	63.305	64.083	65.048
63.729	63.785	68.507	64.19	63.904	65.854	76.789	72.177	64.617	65.99	77.341	66.194	63.93	63.05	61.75	63.77	63.421	66.242	307.965	64.123	71.719	85.551	92.952	64.98	64.956	189.459	334.431	66.864	64.031	83.394	64.306	63.488	90.671	63.516	165.628	63.456	63.676	63.51	65.14	68.515	65.65	64.316	62.823	63.957	71.179	64.111	63.194	63.89	63.275	65.358
64.488	65.284	91.11	63.305	65.336	73.601	79.681	68.256	64.093	66.342	120.068	67.83	64.183	64.918	63.532	64.039	63.692	65.326	425.109	63.596	69.856	106.199	102.541	65.791	64.676	165.363	475.939	66.346	64.846	82.548	65.01	63.917	98.227	63.972	215.463	65.103	64.52	63.258	64.81	68.011	67.285	63.684	63.22	63.273	70.929	63.079	63.022	63.66	63.76	66.633
68.205	63.395	97.805	63.795	64.493	105.544	106.428	68.591	63.827	63.631	149.279	70.252	69.621	62.975	62.048	63.184	63.229	84.492	416.148	63.432	68.566	208.306	79.59	67.573	66.676	134.747	545.177	66.309	75.557	73.688	63.888	62.976	116.924	63.502	275.404	66.081	64.865	63.705	66.5	72.204	69.285	64.728	62.828	63.994	80.083	64.361	63.301	63.78	63.659	65.325
69.428	64.307	102.547	63.095	64.87	127.676	97.476	71.5	65.253	64.43	175.346	71.822	70.34	64.075	63.315	64.406	63.918	108	418.961	63.445	75.6	269.582	81.271	66.675	64.5	131.432	517.083	66.309	96.977	86.507	65.49	63.643	117.627	67.138	279.984	83.766	65.313	63.894	70.345	85.832	70.126	64.939	63.984	63.143	101.286	62.014	64.371	63.76	64.118	68.996
73.602	64	114.944	63.729	64.932	142.826	110.307	85.335	63.86	64.792	201.438	72.311	70.848	63.9	61.29	63.914	65.521	119.155	441.672	63.795	75.431	371.753	98.809	66.368	64.301	125.358	543.165	67.14	137.201	82.925	65.235	62.94	137.976	75.442	330.968	97.503	65.691	64.063	73.786	133.38	71.416	64.86	63.022	64.447	135.866	63.412	68.156	62.424	64.406	74.372
79.32	66.395	109.221	64.886	65.479	130.932	120.229	98.823	65.137	64.698	228.246	74.157	69.247	64.68	63.758	64.25	66.01	128.866	502.333	64.644	75.819	312.436	105.393	66.877	64.794	118.924	534.603	67.614	160.239	89.397	65.583	62.524	130.404	85.525	361.5	118.414	65.567	64.762	75.633	155.416	77.262	64.469	62.344	64.068	163.838	64.204	70.661	63.543	64.327	82.291
119.939	67.301	112.73	64.419	65.349	136.051	95.946	120.348	64.277	64.453	252.708	86.728	77.346	65.185	63.298	63.027	64.842	150.721	483.909	65.39	113.347	344.777	99.128	66.934	65.169	109.377	423.327	68.217	161.076	97.192	66.285	64.131	124.227	101.318	295.519	138.737	65.335	64.02	73.944	160.506	90.243	65.737	63.247	63.528	198.356	63.639	74.801	64.863	64.562	91.018
158.814	67.404	115.303	62.914	65.808	108.956	102.271		65.823	65.151	213.796	111.317	88.169	64.114	63.661	64.008	65.75	160.25	536.581	64.849	172.456	364.17	114.464	66.235	65.912	97.136	390.794	68.541	167.526	103.887	64.375	63.381	111.576	113.484		151.182	65.404	63.881		175.661	102.827	65.202	63.231	63.839	193.685	63.806	93.29	63.534	64.959	90.168
156.773	68.089	123.184	65.19	66.336	109.072	101.036		64.063	65.228	376.3	112.184	87.343	64.783	62.669	63	66.219	166.082	446.013	64.555	251.569	380.327	133.077	66.553	66.787	96.59	343.943	69.932	144.759	112.712	69.069	63.875	106.106	115.336		134.286	66.18	65.311		224.83	96.153	66.123	62.833	64.739	183.481	62.69	113.833	64.381	64.705	89.834
143.736	68.493	121.522	65.329	65.534	100.799	97.807		64.743	65.789	495.938	117.016	82.199	65.651	63.097	62.781	66.74	136.524	394.232	63.514	301.888	277.743	138.136	65.083	67.662		311.095	72.333	155.732	124.418	67.944	64.747	101.922	121.624		134.951	66.096	64.536		292.564	99.647	66.789	63.597	63.174	173.157	64.37		64.881	64.254	78.425
134.949	74.556	116.031	64.575	66.274	100.147			64.04	67.037		112.411	82.435	65.932	62.71	63.652	64.969	141.709	408.312	64.137	284.219	270.373	131.129	65.315	67.287		259.727	76.425		116.178	66.535	65.059	99.671	119.162		135.326	67.567	63.666		310.494	114.287	66.566	64.871	63.634	170.583	65.685		64.253	63.54
141.796	82.017	114.27	64.035	66.493	104.372				69.681		104.787	80.938	64.431	64.274	64.02	64.435	139.356	390.192	64.295	260.46	316.627	124.7	67.06	66.735		254.943	76.498		117	65.174	64.802	99.396	132.655		147.25	65.696	64.636		284.988	114.784	65.061	61.667	65.081	161.685			64.241	64.524
182.01	87.854	113.403	64.545	67.479	97.546				77.339		96.472	79.862	64.833	63.79	64.656	64.949	150.213	347.229	63.877	207.347	286.023	127.276	66.758	68.456		207.439	78.667		137.818	67.486	64.149	103.906			129.042	66.62	64.123		232.692	110.603	68.632	63.054	63.957	143.681			64.561	64.349
229.661	87.722	113.575	64.955	70.164	94.082				90.201		94.462	77.73	65.089	64.339	65.961	64.914	170.4	440.645	64.541	194.585	305.683	131.798	65.013	69.074		183.769	83.763		126.432	68.986	63.712	103.239			122.188	69.133	65.517		228.326	104.653	65.171	63.355	64.758	141.079			66.841	64.425
226.115	83.705	110.754	63.8		94.826				113.805		99.548	76.32	65.612	65.331	63.891	64.164	171.838		64.541	155.822	271.64	138.131	66.437	69.441		158.292	87.483		135.973	68.618	64.521	105.608			112.818	72.665	65.096		229.387	100.937	66.658	63.118	65.031	115.301			68.293	64.244
192.063	81.731	106.945	65.22		106.027				118.332		94.149	73.657	65.299	64.532	64.266	63.651	171.838		64.349	145.713		140.589	69.752	71.11		123.314	92.739		116.969	74.953	63.219	96.365			103.482	73.459	65.053		194.334	97.245		63.274	68.373	93.463			85.409	63.565
159.609	81.054	104.719	66.25						90.115		102.139	72.166	70.114	64.952	63.73	64.353	156.281		64.671	132.723		158.949	73.483	71.493			101.978		112.938	76.299	64.486	93.02			101.664	73.43	64.964		184.09	99.471		63.231	69.373	113.542			102.692	64.8
119.27	81.914	98.898	70.975								94.824	72.017	74.577	63.57	65.336	64.651	131.103		64.979	121.167		193.503	79.586	70.353			99.626		112.623	83.654	65.517				96.568	71.9	64.195			92.264		64.054	71.41	106.296			133.11	65.14
	85.828	89.781	72.805								96.145	73.171	70.858	63.705	63.406	65.928	112.859		64.267	110.339		210.974	77.881				93.71		110.62	135.914	64.434				92.568	72.763	64.583			90.995		64.231	70.41	99.023			150.176	65.594
	81.94		78.785									73.466	72.456		64.828		106.287			105.42		194.351	79.675				89.522		100.397	153.056	63.212				87.276	70.878	64.033			94.291		64.462	70.745	98.88			173.148	65.029
	81.539		95.205										68.765		65.434		97.509			99.914			79.338				84.283		92.024		64.677				80.201	70.267	64.404			87.543		64.608	72.373	88.454			176.94	65.603
	79.679		97.54										67.196				90.147						76.881				84.247				64.094				73.461	71.596	63.881					64.478	82.963				156.356	65.324
	77.628		97.025										68.406				83.331						73.477								65.257				71.812	73.265	65.272					64.339	83.54					64.765
			92.54										69.356										70.815								63.91				70.492	71.759	65.748					66.081	88.689					63.888
			76.15																				73.417								63.701				65.755	72.293						63.935	87.702					65.558
																							71.728								64.319					69.848						64.581	83.224					64.957
																							72.94								64.174					68.452						65.253	85					65.746
																							72.083								63.694					69.304						65.543	85.031					66.85
																																				67.989						65.957	77.87					66.8
																																										65.962	72.46					66.404
																																										64.844						66.625
																																																65.024
																																																65.295
20	25	21	27	16	18	12	9	13	19	12	21	22	26	21	23	21	25	16	21	23	17	22	30	20	11	18	24	12	23	22	30	19	14	9	27	31	26	9	19	23	17	33	32	23	13	11	24	35	12
20	25	21	27	16	18	12	9	13	19	12	21	22	26	21	23	21	25	16	21	23	17	22	30	20	11	18	24	12	23	22	30	19	14	9	27	31	26	9	19	23	17	33	32	23	13	11	24	35	12
229.661	87.854	123.184	97.54	70.164	142.826	120.229	120.348	65.823	118.332	495.938	117.016	88.169	74.577	65.331	65.961	66.74	171.838	536.581	65.39	301.888	380.327	210.974	79.675	71.493	189.459	545.177	101.978	167.526	137.818	153.056	65.517	137.976	132.655	361.5	151.182	73.459	65.748	75.633	310.494	114.784	68.632	66.081	88.689	198.356	65.685	113.833	176.94	66.85	91.018
63.431	63.395	63.643	62.914	63.904	63.614	66.09	68.256	63.493	63.631	63.438	64.53	63.711	62.975	61.29	62.781	63.229	65.326	70.882	63.432	65.216	85.551	72.05	63.642	64.301	96.59	119.699	65.131	63.365	62.894	63.888	62.524	69.169	63.502	86.018	63.456	63.676	63	64.81	63.161	64.308	63.096	61.667	62.516	70.929	62.014	63.022	62.424	63.131	65.048
166.23	24.459	59.541	34.626	6.26	79.212	54.139	52.092	2.33	54.701	432.5	52.486	24.458	11.602	4.041	3.18	3.511	106.512	465.699	1.958	236.672	294.776	138.924	16.033	7.192	92.869	425.478	36.847	104.161	74.924	89.168	2.993	68.807	69.153	275.482	87.726	9.783	2.748	10.823	247.333	50.476	5.536	4.414	26.173	127.427	3.671	50.811	114.516	3.719	25.97
20	25	21	27	16	18	12	9	13	19	12	21	22	26	21	23	21	25	16	21	23	17	22	30	20	11	18	24	12	23	22	30	19	14	9	27	31	26	9	19	23	17	33	32	23	13	11	24	35	12
1.89079	0.723298	1.01417	0.803043	0.577657	1.17588	0.989841	0.99082	0.541918	0.974223	4.08304	0.963388	0.725892	0.613989	0.537867	0.543054	0.549468	1.41474	4.41765	0.538353	2.48543	3.13122	1.73694	0.655961	0.588599	1.55981	4.48842	0.839581	1.37923	1.13465	1.2601	0.539399	1.13595	1.09214	2.97621	1.24468	0.604785	0.541301	0.622683	2.55628	0.945012	0.565044	0.544042	0.730173	1.63306	0.540782	0.937183	1.45674	0.550373	0.749348
1.04924	0.613817	0.899212	0.534772	0.538551	0.844582	0.803879	0.59423	0.52891	0.542107	1.55102	0.777702	0.603628	0.53627	0.523056	0.526975	0.532269	1.06095	3.43771	0.529338	0.933181	2.28665	1.03725	0.551584	0.549184	1.03207	2.65729	0.612359	0.963989	0.855297	0.546751	0.526197	0.849963	0.662617	2.26739	0.79504	0.559751	0.528218	0.547492	1.44621	0.759606	0.535645	0.523592	0.535603	0.934787	0.523937	0.529964	0.530787	0.532714	0.590171
3.70838	1.65095	2.01974	1.74478	1.49242	2.25931	1.98597	1.98731	1.45591	1.96458	16.9479	1.94988	1.65392	1.53049	1.45182	1.45705	1.46355	2.66611	21.372	1.45231	5.60002	8.76174	3.33328	1.57567	1.50379	2.94815	22.4465	1.78953	2.6013	2.19565	2.39513	1.45337	2.19763	2.13191	7.86919	2.36965	1.52075	1.45528	1.53974	5.88191	1.9252	1.47943	1.45805	1.65884	3.1017	1.45476	1.91479	2.74487	1.46446	1.68103
[truncated: 2 more columns]

## Sheet: 4D-pGPD(raw)
62.379	63.146	62.977	63.408	62.653	63.349	62.102	62.491	62.526	63.202	62.417	63.224	64.269	62.555	64.524	83.951	63.343	64.019	69.029	62.563	63.415	63.556	63.402	63.5	64.367	220.461	63.435	62.533	62.953	63.873	65.664	69.299	63.463	64.392	64.071	62.895	62.758	77.07	63.74	62.39	61.471	62.49	62.248	63.034	63.926	65	64.518	63.407	64.26	65.441
63.386	63.099	63.621	65.45	63.157	63.135	62.791	63.961	62.206	62.543	63.463	62.686	63.548	63.934	82.43	87.86	64.753	63.696	67.048	61.382	62.97	62.987	63.234	63.363	62.595	293.137	62.756	62.401	63.921	62.752	64.917	94.958	62.722	64.205	63.525	63.992	63.186	80.035	64.093	62.991	63.378	67.931	63.353	64.25	63.093	63.188	64.113	62.601	63.623	63.452
61.963	63.391	63.428	64.133	63.164	64.234	64.12	64.043	62.057	64.957	63.718	62.785	62.827	63.797	119.57	106.568	68.807	63.389	66.053	62.447	65.517	62.893	62.509	65.153	62.772	341.59	62.62	62.262	70.065	63.061	65.579	135.948	62.953	64.742	64.307	62.54	62.82	110.379	63.718	63.294	62.054	70.949	62.87	62.91	62.667	66.059	65.704	62.701	63.923	63.514
61.772	63.698	63.322	64.263	64.219	62.745	63.724	63.783	63.544	66.146	62.965	62.639	64.048	65.767	178.718	128.258	76.156	63.981	66.276	63.108	67.74	62.391	62.517	75.905	64.213	350.034	62.435	62.596	70.648	62.836	67.971	182.007	63.125	64.583	63.702	63.661	62.707	111.147	63.141	63.747	63.829	68.616	64.408	63.631	63.102	65.729	64.378	62.493	63.104	63.114
62.953	63.053	63.543	64.185	64.204	63.969	64.462	64.413	64.083	64.676	61.831	63.796	64.62	67.485	195.309	128.106	82.356	63.114	63.809	62.45	68.203	63.218	62.874	100.857	63.728	390.232	62.627	63.407	69.183	64.609	71.954	159.052	63.286	64.305	63.458	63.328	63.43	135.674	64.377	64.11	63.673	68.907	67.372	64.455	63.046	67.584	63.54	62.525	64.566	64.864
62.611	63.513	63.585	63.734	65.153	64.068	65.307	64.904	63.481	65.497	63.018	62.821	64.977	69.87	187.215	111.428	101.92	63.348	66.235	63.09	63.707	63.078	62.682	122.904	64.075	356.096	62.947	63.646	68.38	63.579	76.692	252.521	64.776	65.871	63.063	64.134	62.476	202.092	63.748	63.517	63.898	67.856	66.58	64.606	63.844	67.478	64.601	63.501	64.212	65.798
62.966	63.874	63.11	63.341	65.102	64.531	63.449	64.872	62.854	64.756	64.297	63.752	64.073	77.776	215.303	103.698	117.555	64.199	64.765	63.055	67.67	63.369	64.002	137.078	65.535	381.324	63.129	63.012	69.44	63.976	73.583	279.639	64.402	64.354	64.118	63.862	63.61	188.234	64.224	63.477	65.27	68.642	66.954	64.639	64.046	67.886	65.451	62.463	64.093	65.593
63.111	63.887	63.989	64.145	65.803	64.365	63.998	64.223	63.699	65.033	62.674	62.789	63.253	76.827	225.731	102.906	137.727	64.019	68.387	63.312	74.283	62.591	64.236	135.565	64.948	306.154	62.876	63.634	68.082	63.915	74.491	288.167	64.645	63.844	63.483	64.874	63.134	162.22	63.393	63.366	65.127	66.807	66.404	66.222	63.387	69.091	64.753	62.537	64.676	65.931
62.98	64.198	64.048	64.855	66.533	64.197	63.553	65.416	62.326	64.917	62.932	62.574	63.338	92.064	245.478	100.103	156.789	64.196	73.182	62.623	87.77	63.852	63.087	139.294	64.638	329.437	64.177	63.589	69.098	63.948	72.496	263.858	63.962	63.732	62.63	64.204	63.131	188.183	63.788	62.613	65.978	69.791	66.372	66.177	64.026	67.948	65.052	62.648	64	64.814
62.933	62.781	63.376	63.751	73.036	65.032	64.376	66.153	62.934	63.774	63.383	63.483	64.201	115.694	273.864	102.388	167.236	63.709	79.489	62.555	91.96	63.557	63.942	138.839	64.815	271.735	63.696	63.071	67.667	65.585	73.438	302.892	65.126	65.325	63.84	64.877	63.43	156.206	64.218	62.772	66.914	69.131	66.45	65.725	63.795	69.712	66.081	62.848	64.008	64.88
62.228	63.45	63.454	63.709	72.449	67.127	63.791	65.266	64.026	63.92	62.948	63.284	64.376	121.636	282.602	100.744	199.323	64.161	79.09	62.646	121.177	63.998	63.333	132.315	64.382	231.093	63.592	63.043	68.56	65.758	71.973	299.938	64.491	64.381	63.79	65.24	63.027	183.188	64.601	64.693	67.876	70.601	66.626	65.798	63.638	67.209	65.891	62.152	65.107	64.765
62.477	63.392	63.078	63.732	73.358	74.435	64.138	65.54	63.345	65.083	62.503	64.033	64.445	154.103	304.659	98.567	217.349	64.146	79.08	62.62	107.25	64.197	63.477	129.62	64.895	213.724	63.866	63.071	69.705	64.597	71.576	296.67	64.568	64.55	63.84	64.815	64.98	164.702	64.954	63.041	72.213	72.366	65.537	67.606	63.733	68.415	69.299	62.47	65.478	63.675
61.574	63.957	62.805	63.711	71.292	79.683	63.727	64.872	63.251	64.312	62.661	64.133	63.808	160.345	336.647	98.042	287.498	64.184	80.785	62.825	111.31	63.655	63.702	131.253	63.29	210.482	66.009	63.602	69.101	65.167	72.562	295.312	64.055	64.748	64.139	64.681	64.908	158.672	64.077	62.524	77.914	68.809	65.032	65.677	63.618	66.462	70.895	62.672	63.659	64.159
62.383	63.857	64.475	65.338	68.729	85.956	63.19	66.429	63.623	64.407	63.469	63.333	64.112	142.024	369.52	100.733	278.151	65	83.603	63.127	93.54	64.14	63.167	119.763	63.97	158.099	63.412	63.102	69.369	64.273	72.384	278.271	67.33	65.123	65.332	65.255	64.89	151.837	64.528	64.002	72.619	69.17	64.31	67.788	64.559	65.354	69.865	63.26	64.011	64.319
63.01	63.982	63.431	64.97	70.062	85.686	63.156	66.264	64.802	65.123	62.279	63.767	64.007	133.624	450.678	109.481	286.952	63.962	89.32	61.794	98.397	64.267	63.74	111.482	63.37	125.229	64.712	62.809	69.268	64.3	72.02	208.226	66.917	66.361	64.269	64.945	64.483	141.11	66.049	63.911	73.657	68.804	66.385	66.677	64.018	67.01	70.929	63.642	63.621
63.144	63.741	63.821	64.943	71.465	91.251	64.498	65.596	66.436	64.864	63.25	62.384	64.34	127.685	530.084	123.728	264.844	64.035	104.576	63.218	92.077	64.121	64.771	105.648	63.767	140.028	63.94	63.728	69.557	64.879	71.46	196.726	66.113	64.523	65.113	64.889	63.917	132.977	65.371	64.699	74.394	68.867	65.541	66.679	64.641	66.209	71.183	62.987	64.22
63.03	64.678	63.443	63.472	70.291	95.775	64.2	66.014	66.706	65.897	62.807	63.976	63.819	121.918	595.661	136.228	232.365	64.206	103.988	63.123	92.217	64.453	63.136	105.327	64.715	158.614	63.362	64.99	69.393	64.661	73.676	202.132	66.59	65.589	63.261	65.172	65.121	131.257	64.383	64.346	71.654	68.687	65.516	66.197	64.431	67.144	71.126	63.539	63.448
62.869	63.681	63.53	64.698	69.868	89.66	65.842	66.06	64.804	65.48	63.401	64.339	64.26	120.736	542.241	134.516	191.826	64.329	106.714	63.452	89.968	63.665	65.112	89.453	64.9	150.552	64.486	62.758	71.219	64.079	74.156	182.285	65.614	65.199	63.239	65.094	64.362	121.642	66.908	63.508	69.467	67.611	64.433	66.785	63.851	65.884	71.045	62.989	63.799
63.111	64.146	62.929	64.281	69.188	82.819	65.901	67.38	66.002	65.668	62.039	64.118	63.796	115.661	692.731	140.127	190.56	63.557	104.705	63.489	85.507	64.82	65.439	90.611	66.24	157.867	63.491	62.559	70.73	64.767	71.051	165.861	66.019	65.169	63.448	64.802	63.253	120.617	67.276	63.437	69.984	69.731	65.576	66.48	64.233	66.832	70.869	63.15	63.96
62.577	65.321	64.768	63.594	71.024	81.283	65.642	65.623	65.834	64.839	63.992	64.685	64.396	111.406	843.844	146.784	175.75	64.513	113.383	63.943	85.595	64.502	64.417	86.467	65.94	146.071	64.187	64.065	71.984	64.988	73.467		66.755	66.036	63.872	64.34	63.036	116.096	67.098	63.173	69.927	69.728	65.835	66.078	64.108	66.606	71.506	62.723	65.016
62.081	65.404	64.078	65.006	71.344	79.914	65.034	64.944	65.409	64.148	63.237	65.308	67.219	107.436	834.555	162.234	161.927	64.627	134.075	63.166	78.201	65.513	64.576	88.255	68.532	131.667	63.998	63.549		65.082	76.603		67.007	67.589	64.401	64.679	64.063	113.05	64.951	64.28	68.165	69.982	64.739	64.919	64.472		68.556	63.356	64.674
62.906	66.219	64.521	63.764	71.179	79.219	65.417	66.257	64.277	65.219	63.531	65.144		106.573	631.042	174.747	133.812	63.519	144.588	63.965	81.912	65.148	63.875	83.411	67.575	132.01	63.636	64.421		64.448	75.542		66.77	70.889	64.713	65.283	64.913	110.172	66.184	64.19	68.775		64.922	65.758	63.985		67.779	64.283	65.321
63.232	64.961	64.493	64	71.406	71.479	65.087	66.097	65.272	64.236	63.862	63.989			740.698	177.688		64.367	135.51	63.276	81.921	65.15	64.529	80.072	67.735		64.468	63.951		65.342	76.134		66.577	75.53	65.24	65.557	63.973	110.798	65.595	64.274	68.619		64.94	64.879	64.195		68.971	63.539	65.126
62.268	67	63.259	64.476	68.471	71.146	68.011	66.528	64.585	65.276	63.195	63.151			551.665	122.666		64.835	116.908	64.709	80.796	66.426	64.948	77.416	69.905		63.608	64.02		64.191	76.888		66.003	93.661	64.372	66.387	65.282	97.032	65.38	64.094	68.68		64.956	65.712	65.895		69.019	63.873	64.614
62.913	66.156	64.956	63.834	67.347	68.803	77.97		64.385	65.201	63.484	63.845						64.835	103.997		77.472	64.505	64.136	74.988	68.9		64.334	64.089		65.297	75.431		66.716	99.353	65.275	66.198		100.408	65.399	64.774	67.498		64.617	65.715	64.395		68.399	64.68	64.658
63.584	65.893	64.739	64.094	66.594	71.454	78.122		64.813	65.678	63.039	63.207						65.035	115.192		83.544	65.553	64.295	72.237	70.967		62.645	63.947		69.367	79.652		66.957		65.438	66.277		99.22	66.69	64.299	66.928		64.195	65.631	64.433		68.938	63.266	64.53
63.007	64.982	64.367	64.224	68.247	68.489	77.431		64.251	72.55	62.745	63.435						64.604	98.033		79.537	65.461	65.531	71.181	71.041		64.23	65.329		67.13	73.893		66.477		65.118	65.581		90.759	64.796	64.958	65.631		64.016	65.121	63.867		67.276	63.384	64.488
62.019	64.977	64.041	63.505		71.2	77.876		64.982	72.148	63.768	62.924						64.212	94.936		81.262	65.308	65.084	71.424	70.018		63.594	64.073		66.418	72.777		66.384		64.864	65.556		88.273	65.982	63.748	65.006		65.681	64.811	64.577		68.112	63.419	64.691
63.875	65.457	65.218	65.391		70.467	74.81		63.112	76.304	63.078	63.722						63.892	92.409		78.758	65.283	65.168	71.418	68.607		64.288	65.112		67.406	71.225		66.91		65.521	65.042		87.266	65.55	64.386	64.989		66.19	64.626	64.131		66.791	63.672	64.937
62.784	64.392	64.773	64.907		66.784			64.445	76.776	62.883	63.64						63.633	82.033		76.915	64.868	65.598	69.903	67.771		64.535	63.652		66.839			66.607		65.039	65.848		90.546	65.454	64.917	66.307		66.094	63.808	65.731			62.977
62.957	63.853	65.394	64.294		65.86			64.606		63.036	64.665						63.32	83.702		71.695	64.402	64.901	69.5	67.579		65.415	64.231		66.248			67.199		65.576	66.885		80.106	66.19	64.922	65.748		65.83	63.818	66.041			63.471
62.76	64.146	64.787	64.285		65.952			63.978		62.935							64.424	81.383		71.813	63.526	63.972	69.168	66.978		64.08	64.408		65.857			67.017		65.333			77.463	65.333	64.437	64.352		66.541	63.949				62.826
63.915	63.96	65.294	64.681					64.947		63.659							64.366	84.82		73.301	65.098	63.703	67.137	65.806		64.314			66.326			66.972		65.159			72.222	65.086	65.096			66.789	63.785				62.859
63.555	64.369		63.314					64.307		63.987							65.591	87.586			64.584	65.398	66.381	66.299		65.059			66.431			67.465		64.174				65.814				65.94	64.086				63.376
62.315	65.263		65.576																		64.634	64.48	67.499	65.914		63.584			66.422			70.035		65.368				64.949				66.443					63.743
63.52	63.938																				65.014	67.785	67.184	65.38		64.288			65.835			79.091		66.295								66.024					63.06
62.995	64.537																					68.746	67.035	65.583					65.904			75.219		66.22								65.047					63.385
	64.995																					70.088	66.31						67.308			71.37		72.797								64.224					62.893
	63.889																					66.778	65.842						66.272			69.742		70.157								63.702					62.508
																						65.994							67.603			69.572		71.663								64.347					62.801
																													67.511			67.545		70.965								63.601					62.457
																													67.632			70.078		69.927													63.276
																													68.406			66.199															62.632
63.915	67	65.394	65.576	73.358	95.775	78.122	67.38	66.706	76.776	64.297	65.308	67.219	160.345	843.844	177.688	287.498	65.591	144.588	64.709	121.177	66.426	70.088	139.294	71.041	390.232	66.009	65.329	71.984	69.367	79.652	302.892	79.091	99.353	72.797	66.885	65.282	202.092	67.276	65.096	77.914	72.366	67.372	67.788	66.041	69.712	71.506	64.68	65.478	65.931
61.574	62.781	62.805	63.314	62.653	62.745	62.102	62.491	62.057	62.543	61.831	62.384	62.827	62.555	64.524	83.951	63.343	63.114	63.809	61.382	62.97	62.391	62.509	63.363	62.595	125.229	62.435	62.262	62.953	62.752	64.917	69.299	62.722	63.732	62.63	62.54	62.476	72.222	63.141	62.39	61.471	62.49	62.248	62.91	62.667	63.188	63.54	62.152	63.104	63.114
2.341	4.219	2.589	2.262	10.705	33.03	16.02	4.889	4.649	14.233	2.466	2.924	4.392	97.79	779.32	93.737	224.155	2.477	80.779	3.327	58.207	4.035	7.579	75.931	8.446	265.003	3.574	3.067	9.031	6.615	14.735	233.593	16.369	35.621	10.167	4.345	2.806	129.87	4.135	2.706	16.443	9.876	5.124	4.878	3.374	6.524	7.966	2.528	2.374	2.817
37	39	33	35	27	32	29	24	34	30	34	31	21	22	24	24	22	34	34	24	33	36	40	39	37	22	36	32	20	43	29	19	43	25	42	31	24	33	35	33	32	21	41	34	31	20	29	43	29	14
[truncated: 4 more columns]

## Sheet: 4D-CR(raw)
62.855	65.219	62.964	66.185	63.584	64.063	61.726	65.804	63.531	65.076	64.733	64.269	63.627	62.864	62.218	68.113	63.94	63.326	64.02	64.514	64.973	63.991	62.531	63.01	63.83	62.445	63.411	64.894	63.12	65.923	63.71	63.998	64.339	63.905	62.735	62.994	66.847	62.121	63.602	65.611	62.715	63.949	69.401	63.494	64.204	65.223	63	64.706	65.286	65.095
62.943	63.413	63.75	66.151	62.996	64.543	61.58	64.915	63.152	65.661	63.736	64.468	63.16	64.033	62.767	65.22	64.167	63.053	63.824	65.899	63.344	63.083	64.418	63.01	63.261	63.872	63.905	65.183	63.519	63.964	64.218	63.794	64.807	63.037	63.327	63.127	64.701	62.155	64.434	65.259	62.232	63.74	65.536	63.823	63.436	64.384	64.541	63.678	66.187	64.405
63.395	62.826	63.005	68.377	63.783	64.21	62.892	65.171	62.856	65.5	63.184	62.569	63.41	62.97	61.712	64.062	64.15	63.179	62.864	63.628	61.977	62.84	62.955	63.259	64.735	63	63.543	63.394	63.867	63.715	62.958	63.241	64.479	64.211	63.56	61.759	63.98	63.638	63.211	64.166	61.224	63.72	65.821	62.579	63.236	63.894	62.473	62.856	66.172	66.056
62.838	63.537	63.786	65.971	63.314	63.077	61.955	63.678	62.364	63.581	63.007	63.481	62.765	62.709	63.145	65.446	63.611	63.415	61.415	63.876	62.645	63.316	63.136	62.352	64.615	62.39	63.029	63.144	63.272	64.358	64.034	63.657	65.598	63.921	62.686	62.09	63.325	63.498	63.861	64.229	62.219	62.485	63.589	62.305	63.444	62.984	63.236	62.761	65.857	67.659
62.048	64.775	63	65.286	62.692	64.027	61.441	63.915	62.243	63.305	64.166	66.741	63.119	62.427	62.788	62.847	63.38	65.382	63.638	62.444	62.77	62.543	62.921	63.01	64.394	62.982	62.994	63.538	62.684	65.252	63.034	63.308	63.267	70.226	61.96	62.56	62.804	64.623	62.976	64.03	64.018	63.646	64.144	61.909	63.707	63.741	63.865	63.564	67.366	67.46
61.175	63.289	63.618	63.471	62.912	63.49	61.632	63.98	62.93	63.623	68.176	69.903	62.47	63.564	62.922	63.425	63.764	64.052	63.312	64.038	63.033	63.656	63.175	62.283	63.442	62.561	63.915	63.404	63.266	64.584	63.139	63.327	63.887	70.063	61.898	62.313	62.216	65.072	64.946	63.099	63.443	63.856	62.983	62.183	64.409	63.365	63.514	63.221	66.392	71.421
62.311	63.272	63.918	64.238	64.316	62.61	62.517	63.965	63.1	62.483	70.113	68.712	62.705	63.624	63.238	62.979	64.317	63.655	63.319	64.696	62.703	61.551	63.661	63.092	64.675	61.732	63.525	63.794	63.244	63.682	62.945	64.222	64.148	70.432	63.192	63.217	62.29	65.449	67.542	62.837	62.952	64.109	62.994	62.232	64.88	64.196	63.02	63.396	65.212	66.008
63.452	64.098	62.412	64.336	63.394	63.017	62.337	66.186	63.636	63.572	69.305	66.192	62.951	63.391	63.39	62.499	64.606	62.827	62.714	64.098	63.563	62.586	64.226	64.106	63.692	61.811	64.601	63.736	62.595	64.642	65.034	63.965	63.936	66.184	63.119	63.516	62.506	65.034	66.56	63.431	62.825	64.149	63.025	62.933	63.96	64.38	65.459	63.472	66.143	69.613
62.994	63.919	63.165	65.36	64.836	63.207	62.094	65.951	62.364	65.017	68.182	65.826	63.713	65.058	66.398	61.88	62.981	63.055	62.016	64.945	64.343	63.336	65.051	64.969	63.363	61.816	65.029	63.762	63.731	63.704	63.395	64.476	63.138	64.347	62.779	63.041	64.604	65.633	65.988	63.542	63.553	65.237	63.531	62.146	63.893	63.843	65.351	63.546	64.714	70.675
61.494	63.529	63.728	65.798	62.982	63.683	64.997	65.65	63.173	64.327	66.75	64.573	64.037	65.397	68.148	63.416	63.577	63.839	61.967	62.845	64.37	62.73	65.271	63.123	62.954	63.671	65.499	63.585	63.047	64.964	62.739	63.883	63.675	64.468	63.073	66	64.289	65.57	65.619	62.527	61.947	66.652	63.766	62.537	64.404	63.518	64.264	62.963	67.374	68.891
60.897	63.644	63.255	64.367	64.197	63.183	62.559	65.222	62.947	64.533	66.729	66.297	65.313	63.636	65.959	63.425	62.183	64.112	63.533	63.601	63.533	63.199	64.667	63.792	62.635	63.096	63.83	63.312	62.674	64.77	63.723	64.987	63.611	66.133	65.049	66.986	63.954	64.522	66.797	63.816	63.75	66.172	66.116	62.811	64.724	63.608	65.007	63.831	66.275	70.371
62.61	64.434	63.698	64.669	64.319	64.147	62.861	66.836	63.249	63.684	67.429	68.82	65.146	66.394	69.076	63.748	62.764	66.939	63.141	63.248	62.841	63.02	64.91	63.369	63.801	63.636	63.874	63.648	63.899	65.664	63.832	64.94	63.328	64.827	66.188	65.448	65.351	64.807	68.145	64.506	62.004	68.25	66.616	61.037	65.089	64.216	64.696	66.979	67.513	74.219
64.376	63.941	62.514	66.726	63.958	64.04	62.601	69.024	63.006	62.747	67.326	67.369	64.556	65.682	69.57	63.469	65.349	67.106	63.141	63.29	63.086	63.246	64.232	63.775	62.604	63.125	63.378	63.774	65.778	67.456	62.861	66.187	63.235	63.705	65.323	66.178	67.577	66.295	70.163	66.09	63.469	70.134	65.014	61.22	63.916	64.157	63.412	69.991	68.612	80.076
63.027	64.681	63.316	69.06	63.392	64.64	62.536	69.367	63.68	63.794	67.797	69.68	64.388	65.563	67.299	64.903	69.039	66.458	63.385	62.654	63.275	62.422	65.384	64.454	63.15	63.052	63.185	63.275	63.396	66.128	63.513	65.308	64.051	63.791	64.907	65.563	66.138	65.681	68.637	66.108	65.456	69.758	65.613	60.476	64.796	64.129	65.203	70.399	68.308	75.245
62.785	64.064	63.538	69.102	64.869	65.983	62.355	69.274	64.114	63.516	66.9	70.131	64.563	67.111	65.262	62.974	66.885	65.1	63.845	64.058	65.14	63.359	64.921	63.352	62.867	62.604	63.073	64.029	64.297	68.044	63.609	64.368	64.746	64.214	64.184	65.623		64.425	69.067	65.018	67.807	69.725	64.647	63.165	65.982	64.494	65.338	68.837	66.967	75.116
63.165	64.414	63.228	67	63.403	65.634	62.912	72.142	64.622	64.681	66.295	67.84	64.713	66.826	67.206	63.17	67.816	64.888	65.243	64.421	63.228	61.785		63.02	63.692	62.76	64	64.212	65.437	67.449	64.092	63.775	63.74	65.464	64.363	65.923		66.014	70.5	65.054	66.079	68.457	69.904	62.512	63.862	64.706	65.574	68.641	68.538	73.106
62.622	64.998	63.745	65.164	63.633	64.765	63.148	70.756	64.044	63.085	67.118	69.307	64.358	66.308	70.201	64.402	66.645	64.278	64.661	63.397	63.832	61.477		63.3	63.033	63.021	63.9	64.352	62.519	66.026	63.076	64.356	67.65	64.577	63.445	65.716		66.367	67.547	65.389	65.259	67.328	67.859	62.646	65.089	63.337	64.453	67.512	70.088	74.851
64.192	64.777	64.374	63.988	64.184	65.091	62.783	70.249	63.032	64.747	65.939	69.951	64.746	65.063	69.683	64.537	64.26	66.043	63.28	63.058	63.755	61.797		65.283	63.566	62.453	64.199	64.287	66.329	64.876	63.853	64.93	68.63	64.063	65.316	69.09		65.153	68.852	65.039	65.89	66.326	66.667	62.5	64.636	64.541	63.52	65.242	68.168	73.189
63.597	65.47	64.159	63.467	65.246	64.339	65.126	70.814	63.625	65.799	66.982	67.739	64.75	65.234	69.924	63.804	64.523	66.002	63.246	64.228	64.443	61.891		63.993	62.739	63.505	65.666	62.946	68.361	64.485	63.647	64.762	67.601	65.187	64.035	67.814		67.075	68.797	63.94	64.965	67.932	66.141	62.012	65.036	63.812	76.365	66.16	69.524	70.712
63.324	66.255	64.195	63.667	64.92	63.891	63.479	71.592	62.63	65.975	64.942	68.16	63.963	66.9	68.895	63.548	64.118	65.589	63.633	62.893	63.559	62.152		65.259	63.201	63.038	63.455	62.699	66.32	63.967	63.626	64.67	65.241	64.509	64.803	69.041		67.332	68.27	64.22	65.763	67.093	65.497	62.329	62.987	63.796		65.798	68.996	71.977
62.994	65.478	64.615	63.667	64.485	63.838	64.183	71.663	66.897	66.742	64.998	67.089	64.72	65.029	68.86		64.697	64.47	63.48	63.109	62.927	62.6		64.433	63.044	62.735	64.625	63.473	66.484	71.631	62.286	63.305	66.161	64.124	65.124	72.899		66.838	67.221	63.861	65.399	66.573	64.161	62.793		63.067		67.923	69.388	71.43
62.93	65.078	63.739	63.871	64.254	63.956	63.96	70.604	67.161	66.223	64.378	66.635	65.205	65.508	70.552		66	64.378		64.252	63.727	62.483		64.498	63.929	63.276	64.443	63.499	65.218	68.5	63.181	64.229	66.865	65.27	65.531	76.24		68.16	68.988	63.184	66.193	68.212	66.381	62.28		62.682		67.135	67.509
63.496	64.861	64.687	63.986	64.188	65	64.693	70.513	66.358		64.442	65.717	65.633	66.247	70.038		64.607			64.876	63.86	63.326		63.741	63.697	63.276	64.018	63.35	65.589		64.13	67.441	64.72	66.333	64.991	71.77		68.208	68.442	63.172	64.193	70.848	67.206	63.409		63.796		67.052	68.011
62.684	65.75	64.786	63.152	63.867	64.692		70.599	65.745		65.912	66.829	65.524	66.737	68.741		64.762			63.603	64.157	62.969		63.43		62.657	63.748	64.186	63.896		63.815	70.298	66.023	65.396	64.613	72.358		68.574	71.212	65.373	65.18	67.652	67.37	62.933		64.686		65.319	69.322
62.591	67.439	64.294	64.414	64.066	64.177		70.685	64.739		66.603	67.022	65.235	67.066	71.029		64.841			65.738	64.004	62.571		63.235		65.035	63.44	64.123	64.94		62.504	67.981	65.904	64.745	64.695	69.814			70.517	64.036	64.254	68.025	68.859			65.122		67.448	66.971
62.198	68.314	64.143	64.988	64.701	64.479		68.051	66.871				64.172	67.497	69.683		65.586			64.529	63.736	63.414		62.997		64.66	64.029	65.304	64.674		63.803	67.241	67.759	63.126	64.19	67.757			70.352	64.819	64.412	67.217	68.802			65.478		67.81	67.516
62.758	68.226	65.676	64.988	64.35	64.271		71.403	65.893					67.971	71.738		65.752			64.855	64.009	63.155		63.43		65.012	63.777		64.835		63.815	66.006	66.958	63.8	65.199	66.26			71.39	63.181	64.724	69.283	68.91			64.796		66.712	66.546
62.88		63.934	63.695	64.042	64.08		69.956	65.672					66.342	69.683		66.06			64.761	63.325	63.693		63.764		63.195	65.44		65.491		64.294	64.911	65.019	64.32	64.577	67.557			70.076	65.087		68.611	68.432			64.255		66.021	68.088
		65.176	63.874	64.354	63.792		71.022	65.6					65.358						63.974	64.591	63.257		62.847		64.302	63.669		66.165		64.294	64.629	63.666	64.448	64.535	67.087			68.759	64.973		67.164	67.418					67.761	66.487
		63.896	63.529	64.119	64.271		68.411	65.818					66.103						63.936	65.198	62.883		64.124		62.875	65.965		65.358		65.391	63.994		64.462	65.334				69.198	65.166		66.866	67.655					67.331	67.451
		64.953		64.81	64.153		68.995	66.588					64.871						63.746	64.929	63.236		63.39		63.084	65.971		66.158		64.655	64.317		63.896	63.325				68.933	63.596		66.432	67.571					66.215	65.44
				64.708	64.463		67.883	65.715					64.555						63.994	65.693			62.55		63.602	66.587		66.671		63.319	64.375		64.149	63.894				69.645	64.28		68.846	68.556					67.994
				65.1	64.574		67.758	66.139					65.21						63.687				62.838		63.381			66.506					64.642	64.44				68.895	64.928		68.03						68.727
					64.738		68.073	68.961					65.661						64.944				63.91		63.39			66.494					65.809	63.593				68.814	65.021		66.77						68.592
					64.574		69.088	67.297					64.431										64.978		63.869			66.307					65.833	64.558				68.148	64.301		66.573
					64.169		67.902	65.514															65.399					65.785					66.982	65.285				68.384	64.28		65.629
					65.133		72.249	66.625																				67.494					66.124	64.504				68.358	65.961
					65.04		73.166	66.078																				67					64.851	67.316				66.593	65.636
							68.628	65.355																				66.725					64.786					68.154	65.284
								64.799																				66.146					64.745					66.613	64.232
								65.092																				65.459					65.124						65.299
								64.473																				64.88											65.766
								66.143																															65.621
								65.762
								65.145
28	27	31	30	33	38	23	39	45	22	25	25	26	35	28	20	28	22	21	34	32	31	15	36	23	35	32	26	42	22	32	32	29	41	38	29	14	24	40	43	27	36	32	24	20	28	19	34	31	21
								45																				42											43
64.376	68.314	65.676	69.102	65.246	65.983	65.126	73.166	68.961	66.742	70.113	70.131	65.633	67.971	71.738	68.113	69.039	67.106	65.243	65.899	65.693	63.991	65.384	65.399	64.735	65.035	66.587	65.304	68.361	71.631	65.391	70.298	68.63	70.432	67.316	76.24	67.577	68.574	71.39	66.108	67.807	70.848	69.904	63.823	65.982	65.478	76.365	70.399	70.088	80.076
60.897	62.826	62.412	63.152	62.692	62.61	61.441	63.678	62.243	62.483	63.007	62.569	62.47	62.427	61.712	61.88	62.183	62.827	61.415	62.444	61.977	61.477	62.531	62.283	62.604	61.732	62.994	62.699	62.519	63.682	62.286	63.241	63.138	63.037	61.898	61.759	62.216	62.121	62.976	62.527	61.224	62.485	62.983	60.476	62.987	62.682	62.473	62.761	64.714	64.405
3.479	5.488	3.264	5.95	2.554	3.373	3.685	9.488	6.718	4.259	7.106	7.562	3.163	5.544	10.026	6.233	6.856	4.279	3.828	3.455	3.716	2.514	2.853	3.116	2.131	3.303	3.593	2.605	5.842	7.949	3.105	7.057	5.492	7.395	5.418	14.481	5.361	6.453	8.414	3.581	6.583	8.363	6.921	3.347	2.995	2.796	13.892	7.638	5.374	15.671
28	27	31	30	33	38	23	39	45	22	25	25	26	35	28	20	28	22	21	34	32	31	15	36	23	35	32	26	42	22	32	32	29	41	38	29	14	24	40	43	27	36	32	24	20	28	19	34	31	21
1.03092	1.09399	1.05174	1.10661	1.04486	1.05666	1.04293	1.17169	1.10435	1.06881	1.1228	1.12308	1.05105	1.08849	1.14882	1.09077	1.1056	1.07464	1.04481	1.05531	1.05201	1.02476	1.04707	1.04731	1.03667	1.04148	1.06633	1.04578	1.09474	1.14711	1.04718	1.12576	1.09905	1.1279	1.078	1.22091	1.08218	1.09815	1.14325	1.05866	1.08587	1.13457	1.11945	1.02207	1.05664	1.04857	1.22292	1.12738	1.1224	1.28234
1.00677	1.03581	1.0209	1.03357	1.02785	1.028	1.0025	1.10489	1.0377	1.03179	1.06659	1.0733	1.03088	1.04665	1.09608	1.01703	1.03394	1.03015	1.014	1.02465	1.0206	1.00839	1.02862	1.01545	1.01597	1.01023	1.02334	1.01997	1.04553	1.03963	1.01975	1.03085	1.03643	1.03518	1.03246	1.05693	1.02706	1.04908	1.0949	1.03301	1.02799	1.07262	1.06111	1.00098	1.02977	1.02719	1.03216	1.06435	1.07893	1.13239
2.04333	2.13463	2.07303	2.15338	2.06316	2.08011	2.06041	2.25275	2.15002	2.09771	2.17769	2.17812	2.07204	2.12652	2.21732	2.12987	2.15188	2.1062	2.06309	2.07817	2.07342	2.03462	2.06632	2.06667	2.05149	2.05833	2.0941	2.06449	2.13574	2.21469	2.06648	2.18216	2.14213	2.18541	2.11111	2.33094	2.11724	2.1408	2.20877	2.083	2.12265	2.19553	2.17264	2.03083	2.08008	2.06848	2.33418	2.18461	2.17708	2.43234
[truncated: 2 more columns]

## Sheet: 4E-Control(raw)
62.771	63.386	62.759	63.326	62.077	63.521	63.866	62.778	63.077	62.604	62.863	61.974	62.503	62.384	62.554	62.936	61.145	62.836	63.076	63.057	63.216	63.254	62.464	62.643	61.737	62.372	62.339	71.342	62.352	62.391	63.788	63.309	62.218	60.716	73.947	62.497	62.562	62.416	65.118	62.966	66.267	63.548	61.95	71.541	65.719	62.85	61.879	62.74	65.253	74.466
62.367	62.489	61.909	62.79	63.027	62.437	64.14	61.65	62.666	62.577	62.981	60.949	62.887	62.171	63.456	62.424	60.91	62.799	62.577	63.753	62.498	62.114	62.955	62.59	61	63.789	63.308	73.667	62.823	63.175	63.038	62.047	62.818	61.991	72.711	63.123	62.745	62.508	64.678	62.776	66.485	63.315	62.262	69.175	65.639	63.769	61.421	67.868	65.037	85.102
62.346	63.806	61.7	63.048	63.244	63.034	66.561	62.006	61.812	63.637	63.803	62.181	61.912	62.514	62.899	62.854	61.547	62.701	63.392	66.606	62.864	62.235	62.4	62.659	62.968	62.623	63.079	74.19	61.899	62.479	62.346	62.262	63.73	62.138	69.889	63.191	62.545	62.724	65.973	62.492	67.351	62.805	62.37	72.088	65.193	64.555	62.009	67.679	65.116	131.221
63.022	62.327	63.353	62.597	63.247	62.128	72.892	62.663	63.404	62.544	63.379	61.523	63.39	62.654	62.965	62.146	61.038	63.36	62.861	66.24	61.555	62.768	62.672	61.802	62.217	63.678	62.933	72.557	62.739	62.267	62.821	62.665	63.583	61.931	91.726	62.205	62.165	62.823	64.359	63.092	66.387	63.346	61.926	100.09	65.965	66.552	63.799	65.935	64.644	131.475
62.709	63.373	62.65	63.327	63.075	63.385	70.503	62.131	62.955	63.311	63.508	62.366	62.47	62.422	63.608	63.358	61.116	62.868	63.435	65.724	61.81	62.375	63.392	62.614	62.039	62.166	62.361	76.748	62.085	63.002	62.541	62.147	63.248	63.22	86.206	63.481	63.373	62.349	64.009	62.991	70.12	63.302	62.986	110.833	65.421	68.047	64.345	65.333	65.15	120.233
63.375	63.108	61.819	62.708	62.795	62.856	65.081	64.144	62.604	63.068	65.15	62.518	62.242	62.47	64.041	64.006	61.745	63.074	63.376	65.549	62.249	62.419	63.464	62.573	62.115	63.239	62.647	86.808	62.913	63.113	63.047	62.815	63.108	65.174	88.741	63.273	62.94	62.789	64.563	64.559	71.408	63.062	63.221	104.835	66.24	69.578	64.178	65.261	64.795	120.287
62.854	62.668	61.666	62.486	63.66	64.601	64.456	62.473	64.102	63.486	65.49	62.131	62.58	63.181	63.959	63.522	61.67	63.613	63.478	65.694	62.188	65.375	63.37	63.296	62.719	63.143	63.784	92.94		63.523	62.926	63.474	65.904	66.353	88.178	62.583	61.932	63.23	64.915	63.561	70.549	62.488	62.384	111.003	69.132	78.9	65.29	65.48	64.811	119.059
62.554	62.707	62.303	63.629	63.045	64.115	65.497	62.964	64.108	63.366	65.18	62.455	62.75	62.968	63.481	65.297	61.787	62.879	62.856	65.083	62.487	65.41	62.525	62.313	61.608	64.035	63.534	101.908		63.546	63.011	63.5	64.908	74.111	93.623	64.847	61.995	62.964	65.181	67.221	69.337	62.907	62.961	117.175	77.478	80.913	64.333	70.263	65.236	111.378
62.816	65.825	62.963	63.765	63.828	63.007	65.089	62.822	63.849	63.59	65.547	63.448	62.797	63.057	64.158	65.323	62.481	65.764	63.418	65.188	62.768	66.121	63.345	62.867	62.256	62.995	63.07	86.954		63.889	62.692	62.747	65.881	77.919	88.711	64.853	62.834	61.918	66.486	71.213	68.397	63.308	62.534	116.839	83.811	84.628	64.785	68.441	64.211	113.199
62.342	65.649	62.942	63.111	64.242	63.57	65.025	62.344	63.392	62.658	68.804	62.528	61.909	64.66	63.481	78.075	61.109	71.882	62.957	67.496	63.533	65.717	63.383	63.159	61.891	63.601	63.959	79.913		64.245	63.761	62.612	66.245	99.203	97.698	64.996	62.73	63.019	66.469	73.099	71.944	64.147	62.808	143.211	92.532	89.13	64.782	66.612	65.287	137.584
62.317	66.015	62.607	63.578	63.953	62.459	65.663	63.609	64.086	62.997	70.368	62.627	63.44	66.626	65.212	87.967	62.129	77.176	62.666	71.744	69.194	65.46	63.764	63.121	62.355	64.451	63.682	83.105		64.147	63.31	63.941	68.082	99.48	107.145	65.028	64.043	62.772	69.12	79.182	72.525	63.769	61.852	136.712	92.85	106.253	64.963	67.049	66.027	136.28
66.183	65.52	62.961	64.187	63.392	62.777	67.053	63.077	62.618	64.975	73.395	63.01	62.571	66.598	63.392	78.671	62.093	83.291	63.222	72.349	72.298	65.359	62.768	64.378	63.07	64.081	63.262	89.841		68.967	64.149	64.304	67.636	89.882	122.783	65.715	64.405		71.133	79.792	68.639	63.23	61.941	145.089	85.508	103.516	65.87	64.442	68.678	134.615
65.933	64.9	64.168	64.854	63.85	63.038	67.668	67.887	63.028	65.002	72.553	63.281	63.714	71.474	64.12	78.759	61.67	79.361	62.984	70.543	71.276	65.802	66.077	63.663	63.977	64.896	63.786	93.323		68.918	66.186	62.84	66.45	90.929	108.017	64.66	64.945		71.307	77.956		63.537	62.117	134.081	81.985	114.938	65.078	65.268	69.186	130.104
65.3	65.908	63.732	65.183	66.331	67.101	68.035	69.063	63.002	70.041	72.04	61.926	64.564	80.43	63.981		61.984	73.145	63.402	72.634	75.13	65.472	66.008	68.486	65.172	64.812	67.019	106.368		67.583	67.508	66.521	66.787	101.024	96.969	65.905	69.166		71.583	73.621		65.577	64.688	94.003	77.861	105.045	65.451	63.602	75.974	113.238
65.988	65.939	67.01	75.346	65.207	66.418	68.786	69.302	65.741	68.185	69.381	62.802	64.615	71.102	62.542		65.814	71.46	63.49	76.042	71.163	66.115	66.003	70.186	66.765	69.093	66.454	102.123		68.989	69.839	66.738	67.179	99.198	95.509	68.893	71.43		71.877	73.121		65.494	64.767	124.547	75.889	99.386	66.33	65.896	76.306	97.809
65.704	66.953	68.305	76.126	65.211	65.747	80.196	68.999	65.69	68.389	71.972	62.865	64.194	73.9	65.661		66.236	72.442	62.939	80.454	89.204	66.548	65.856	79.334	68.371	72.588	67.446	98.47		67.44	68.307	64.266	70.68	111.988	96.756	90.587	72.501		71.416	76.819		65.823	65.602	120.958	81.147	87.671	66.054		70.802	98.394
67.343	66.751	70.12	77.379	65.441	65.705	80.282	68.755	66.528	68.306	71.698	61.885	65.063		66.369		66.684	72.291	65.499	80.439	117.37	68.18		93.781	69.967	83.409	68.159	92.894		67.907	67.417	67.457	72.936	111.444	90.751	90.78	70.304		72.961	84.761		67.692		94.897	74.959	86.585	65.402		79.061
69.597	66.453	70.142	80.126	65.03	66.527	79.612	70.862	66.212	69.197	68.227	64.685	64.892		65.508			70.41	65.493	78.665	118.279	67.712		101.293	70.735	96.62	70.635	86.102		69.19	69.313	67.963	71.067	102.664	81.795	103.102	71.274		72.235	87.792		66.18		95.881	74.03	78.551	64.979		82.825
68.277	67.875	69.456	87.551	66.639	65.99	102.637	73.473	65.826	70.044	71.281	64.485	65.199		64.081			69.536	66.345	85.39	107.205	71.925		99.163	72.768	107.375		84.575		70.034	67.087	67.713	68.688	79.15	78.656	104.16	75.964		70.243	94.308		66.46		86.241	71.683	75.88	64.383		88.499
68.281	68.722	69.378	89.853	66.34	66.744	94.543	68.902	64.836	69.307	72.177	66.561	66.728		65.666			68.218	65.526	78.946	98.984	72.515		118.932	74.241	111.217		81.442		70.832	67.463	67.759	73.574	75.801		118.392	74.495		72.694	105.096		65.373		85.41			63.689		97.019
71.478	70.359	68.271	79.434	66.575		93.49	78.131	65.933	68.847	73.899	67.302	67.84		65.234			69.391	65.244	75.193	89.764	83.093		126.552	72.826	109.687		75.756		79.725	67.836	70.446	73.806				81.849		73.087	110.568		65.887		82.423					92.717
71.885	70.47	71.215	99.036			86.829	90.494	65.118	68.645	73.342	64.932	69.889		65.364				67.676		84.205	83.278		120.661	73.655	121.777		73.161		85.701	67.766	73.506	73.396						68.578	100.393		65.97		84.819					87.717
77.639	76.945	73.217	97.376				94.329	65.867	70.051	72.624		69.476		64.57				65.916			78.675		102.545	67.428	130.23		68.504		83.088	67.187	72.112	71.524							97.284		66.815							83.467
77.846	86.916	71.581	96.93				96.433	64.813	71.643					64.727				70.499			86.564				103.896				86.131		79.983								94.639		66.641
77.56	87.994	71.498	91.634				90.788	65.504	71.121					66.508				75.252													78.392								87.368		66.765
77.356			80.176					66.115	77.926									74.097																					83.526
			77.397						79.68									82.798																					82.001
			80.033						76.39									79.69
			72.977															75.001
			71.756
26	25	25	30	21	20	22	25	26	28	23	22	23	16	25	13	17	21	29	21	22	24	16	23	23	24	18	23	6	24	23	25	23	20	19	20	21	11	22	27	12	25	16	22	19	19	20	15	23	16
6	8	8	1	33	38	28	8	6	3	19	28	19	50	8	58	49	33	2	33	28	15	50	19	19	15	47	19	63	15	19	8	19	38	44	38	33	60	28	5	59	8	50	28	44	44	38	57	19	50
[truncated: 13 more columns]

## Sheet: 4E-pGPD(raw)
64.018	62.586	63.106	65.159	67.671	64.436	67.633	66.042	65.452	64.937	68.053	65.162	66.05	64.365	63.117	65.68	65.157	65.464	65.883	65.427	63.195	62.877	64.87	64.517	65.12	64.364	64.543	64.235	64.018	64.692	65.497	64.928	64.256	64.175	64.894	64.523	66.211	66.065	65.401	66.519	64.26	65.25	65.432	63.645	65.102	69.922	64.36	63.472	63.953	64.692
63.274	67.462	63.669	64.995	67.61	65.156	72.133	66.606	65.367	65.055	69.238	64.199	65.521	65.542	63.043	65.437	65.56	65.365	65.826	65.514	63.682	62.423	64.947	65.913	64.125	63.845	64.071	65.811	65.658	65.151	65.846	65.366	65.795	63.038	66.199	65.324	65.689	63.66	65.324	65.022	63.7	64.426	65.389	63.702	66.337	75.86	63.435	64.954	62.984	65.092
63.847	65.909	67.278	65.228	70.095	64.658	77.323	66.095	64.982	64.909	70.685	65.285	65.926	65.568	63.06	65.47	65.456	64.865	65.971	66.194	63.314	63.26	64.273	64.962	64.522	64.924	63.504	65.448	65.065	64.508	65.416	65.803	64.79	62.775	65.394	66.192	66	64.42	65.138	66.75	63.81	65.242	66.684	65.227	65.596	73.093	62.392	65.349	64.049	63.739
64.332	65.785	65.478	66.755	73.65	65.017	74.816	66.384	66.029	65.456	80.458	64.54	66.496	63.495	63.025	64.334	66.264	65.723	65.171	66.378	63.28	62.223	65.897	65.212	65.139	65.512	64.216	66.128	64.361	65.093	65.859	65.892	64.643	62.975	65.619	65.669	65.982	64.105	64.312	65.713	63.49	66.328	64.958	64.082	65.541	77.146	64.909	65.811	63.28	63.028
63.874	66.229	65.845	66.933	72.741	64.23	71.716	69.277	65.83	65.184	86.595	65.032	65.875	64.48	65.28	64.758	66.819	66.225	66.186	65.524	62.822	62.573	65.763	63.792	64.851	64.786	63.392	65.537	64.674	64.621	64.282	65.444	65.347	63.929	64.075	65.733	65.525	64.59	64.412	65.125	64.045	65.641	65.658	64.869	64.294	73.464	64.64	65.491	63.709	63.925
64.387	66.556	67.264	67.019	72.09	64.359	72.103	68.312	65.273	65.149	97.452	66.374	65.119	65.333	64.517	65.627	66.627	65.752	66.064	65.149	63.86	65.56	65.837	64.031	65.025	63.997	63.608	65.957	65.006	64.069	64.614	66.142	65.992	62.692	64.996	65.744	65.842	64.51	64.35	64.894	64.07	65.895	65.816	64.762	64.882	75.665	63.516	65.594	63.286	63.181
64.04	66.83	66.264	66.405	69.273	64.615	69.434	67.547	65.187	65.843	92.646	65.905	65.008	65.384	63.26	64.382	66.427	65.661	65.764	65.5	63.398	65.281	67.653	65.195	65.649	64.243	66.966	66.584	63.991	63.995	65.715	67.086	66.588	63.054	64.025	66.302	66.105	63.759	64.417	64.972	63.42	65.828	67.075	64.328	64.843	72.418	63.773	64.847	63.47	66.402
64.251	70.597	66.163	66.718	74.537	65.948	69.586	70.828	64.833	67.091	82.814	65.423	66.753	65.859	63.602	65.408	65.758	65.033	66.675	65.75	63.903	65.092	67.56	65.268	65.991	65.439	67.161	68.171	64.188	64.599	65.866	68.864	66.189	63.875	65.241	66.118	66.085	64.359	64.671	66.138	64.015	65.969	66.063	64.708	65.012	71.915	64.852	64.772	68.061	66.53
63.862	72.306	66.527	67.236	73.942	65.233	69.963	69.288	65.521	67.589	76.611	65.891	65.51	66.169	64.775	65.501	66.902	66.237	66.366	65.758	63.691	64.701	67.22	65.776	64.965	64.368	66.952	69.435	65.07	63.495	64.57	71.839	65.208	64.854	64.565	66.087	66.076	64.974	64.388	68.166	64.48	66.27	66.328	64.516	65.055	70.121	64.121	65.552	68.916	66.894
63.575	71.998	66.426	68.061	71.351	66.535	66.263	68.701	64.326	66.752	72.368	65.682	66.496	66.215	64.213	65.212	66.289	65.54	66.307	65.809	64.106	65.844	65.578	65.304	65.109	64.582	67.76	69.818	65.258	65.876	65.628	73.398	65.624	63.717	66.016	66.497	66.438	63.438	64.175	65.653	64.437	65.621	66.287	65.943	65.737	69.385	64.304	65.242	67.986	65.852
64.106	72.475	66.729	67.456	69.82	65.104	64.895	67.174	64.977	72.779	80.308	64.782	66.465	65.442	64.412	65.288	67.423	65.225	66.61	66.348	63.254	66.234	66.324	65.446	65.21	63.974	66.954	69.423	64.669	65.418	65.785	72.685	66.374	62.546	65.619	66.719	67.384	64.915	64.129	65.409	64.616	65.848	65.545	64.79	65.369	69.945	65.19	65.114	67.81	66.538
64.148	72.792	67.406	66.112	72.431	65.399	66.089	67.007	66.097	69.781	78.13	65.549	68.556	69.154	64.475	65.215	66.338	65.96	65.48	65.894	63.852	66.841	65.887	65.067	64.548	63.7	67.38	70.811	65.079	64.599	65.416	70.138	67.748	63.933	64.848	67.168	70.633	64.215	64.658	66.506	64.675	66.512	66.478	65.352	65.004	70.321	66.536	66.47	66.611	66.379
64.749	73.269	68.953	67.619	73.271	65.454	67.128	67.322	65.25	69.171	76.154	65.651	67.393	70.497	64.45	66.366	66.602	65.058	66.154	66.439	62.877	67.12	65.412	65.155	65.023	63.856	65.601	69.131	64.449	66.234	65.883	72.828	66.84	63.646	64.952	67.189	70.952	65.015	63.915	66.388	64.593	65.957	65.601	64.678	66.176	70.959	66.234	65.353	69.211	66.131
63.482	72.855	67.933	68.61	73.04	66.077	66.699	68.177	66.164	67.949	74.751	65.019	66.413	71.652	63.745	65.098	67.092	65.333	66.801	65.872	63.182	69.121	67.834	65.67	65.808	65.24	66.772	68.29	66.238	65.486	65.21	70.697	66.429	65.706	65.733	69.26	69.441	64.474	64.487	66.178	63.311	66.273	65.858	64.672	65.324	69.89	66.647	65.856	69.188	65.852
64.072	73.71	66.693	67.003	71.456	65.198	65.946	68.452	66.031	65.919	74.089	65.184	67.144	69.27	65.98	65.044	67.647	65.594	65.707	65.663	63.275	66.777	65.847	66.009	64.639	64.245	67.317	67.052	64.839	65.813	66.549	69.02	65.416	64.706	64.781	70.666	71.596	63.818	64.61	66.062	65.343	65.238	65.664	65.036	65.895	68.61	66.631	64.774	68.801	66.392
68.507	72.406	69.985	66.814	73.209	65.207	67.233	67.853	65.477	67.485	72.972	65.271	67.117	72.966	65.477	65.924	67.197	65.073	66.22	65.756	62.601	71.714	67.472	68.002	65.641	65.394	66.849	68.088	65.018	65.071	66.626	67.348	66.101	63.305	65.251	70.511	70.342	66.044	64.165	67.322	67.809	66.707	65.795	65.085	65.379	70.591	66.477	65.64	66.916	66.922
67.642	70.43	70.196	67.039	73.291	64.885	67.081	67.975	66.162	67.276	71.535	66.05	67.211	73.872	64.938	66.29	65.989	65.061	65.575	64.768	63.617	74.511	67.628	70.086	65.902	64.211	66.615	67.541	65.839	64.236	66.31	70.038	65.66	64.882	65.13		71.633	66.779	64.981	66.4	67.38	64.508	66.348	65.243	65.246	71.278	66.734	66.453	67.819	66.176
67.238	69.149	69.49	66.613	74.288	64.284	66.929	67.486	65.316	66.56	71.797	65.226	67.347	71.185	64.763	66.406	66.987	66.467	66.215	65.78	63.527	74.687	67.834	68.188	65.917	65.375	66.757	67.333	65.469	64.538	66.626	71.222	65.387	64.849	65.67		71.28	72.75	65	65.069	68.748	65.996	65.972	65.522	65.918	70.411	69.119	67.288	68.335	65.04
67.407	70.103	68.441	67.286	73.274	64.016	66.694	66.929	65.797	66.923	70.063	65.421	67.855	72.142	64.789	65.73	67.092	66.323	67.03	66.697	63.802	66.391	68.073	73.024	64.583	65.671	66.442	66.854	66.185	64.132	66.73	72.143	66.216	64.324	65.6		72.596	76.453	64.946	65.316	67.579	66.371	65.614	64.892	65.09	69.592	68.903	66.93	67.014	65.992
66.365	70.136	68.056	67.608	72.048	63.339	65.813	68.492	65.557	66.503	70.706	65.437	66.51	76.787	66.856	65.194	66.619	65.528	65.9	65.791	66.805		69.987	71.224	65.806	65.03	66.793	68.299	63.639	64.668	65.918	71.4	66.143	64.277	65.343		75.263	76.247	64.165	65.584	66.071	65.978	65.556	64.517	65.902	69.159	67.602	66.281	67.122	65.861
67.567	67.699	67.968	68.908	69.525	63.895	66.9	67.311	68	64.937	68.677		67.636	77.144	70.164	65.557	65.842	64.884	65.955	66.411	64.211		70.668	74.486	64.964	64.626	67.63	67.863	64.24	65.519	66.777	69.774		64.92	65.01		73.178	74.544	64.075	67.088	66.205	66.137	66.013	65.448	65.598	71.039	67.814	66.507	68.453	65.858
66.064	67.314	67.731	69.66	71.288	64.366	65.64		69.194		68.298		68.54	76.153	70.488	65.623	67.189	64.273		65.791	65.161		74.083	71.827	65.555	66.302	69.649	67.446	65.191	66.033	65.942	69.118		69.052	65.057		73.167	74.724	64.451	66.884	66.575	66.217	67.798	65.335	65.617	72.98	68.714	65.707	68.109	66.331
66.738	68.046	67.059	69.456	70.591	66.022			68.229		67.91		68.295	76.508	72.213	66.949	68.638	66.16		65.431	65.638		70.291	74.306	66.301	64.579	70.017	69.002	64.825	65.36	65.929	68.573		69.945	65.114		72.975	74.144	65.416	66.728	66.409	66.602	66.674	65.609	66.355	71.516	68.189	66.805	66.357	66.051
66.355	67.787	66.499	68.055	70.992	68.787			67.676		67.83		68.684	77.461	68.477	68.325	66.479	66.674		65.803	65.94		71.465	71.998	65.549	64.196	69.714	68.336		65.165	66.664	68.136		66.933	63.648		73.531	72.603	65.693	67.838	66.425	65.613	66.735		65.832	73.301	68.131	67.709	67.292	65.726
65.985	67.087	67.259	69.026	72.702	67.012			67.971		69.624		67.503	82.018	69.071	67.776		65.998		66.833	65.416		71.469		64.654	65.31	68.969	70.095		66.481	64.737	68.569		65.809	64.984		72.756	68.385	64.884	66.756	65.697	66.33	65.904		64.851	71.093	66.987	69.714	67.226	66.659
65.832	67.034	66.37	70.025	72.315	67.893			68.596		69.63		69.665	78.8	69.514	67.897		66.686		66.368	64.981		68.738		65.509	64.65	69.022	68.505		67.528	65.784	69.211		66.739	65.717		74.073		66.087	66.847	66.085	67.283	68.129		65.657	72.682	68.157	71.161	67.495	66.179
66.029	67.466	68.369	70.171	70.092	66.743			69.971		71.007		73.775	79.102	67.551	68.286		66.455		66.685	64.782		69.24		65.762	65.762	69.538	68.48		67.714	65.963	68.099		66.706	64.578		73.271		64.733	68.303	65.945	67.28	66.795		65.305	71.578	68.594	69.672	66.916	66.115
66.352	67.318		71.364	70.04	67.554			70.424				72.783	77.224	66.413	68.852		67.449		67.285	66.255		68.475		65.476		70.07			69.612	65.572	68.663		66.913	65.451		74.488		68.147	68.433	66.472	65.788			65.328	72.74		68.617	67.713	65.338
65.542	66.898		72.169	67.661	66.627			71.114				72.464	74.878	65.983	70.778		66.218		65.283	66.232		69.132		65.822		70.954			69.371	66.111	68.315		65.263	64.959		73.818		67.553	69.2	66.764	66.302			66.014	73.296		68.134	67.068	65.698
65.54	68.068		70.607	67.736	67.174			65.713				72.813	80.234	64.541			66.647		66.693	65.79		70.348		65.417		71.923			69.883	67.081	68.668		64.996	64.92		68.907		68.334	68.365	66.478				65.969	74.697		67.792	68.412	65.711
65.566	68.138		71.912	67.139	67.447			65.523				74.412	80.016	64.311			65.818		67.346	65.053		69.383		66.824		69.051			70.795	70.375	67.851			64.667				68.617	68.267					66.815	73.129			68.729	65.872
68.837	66.71		71.486		67.264							72.207	82.305				67.196		66.858	64.523		69.525		67.106		65.846			71.592		67.228			65.349										65.56	72.462				66.595
68.337	66.185				64.695							70.937	76.192				66.609		66.941	66.198		68.796				65.934			70.737		69.943			65.229										66.248	69.707				66.394
68.629	69.22											71.85	73.32				65.888		67.246	64.535		70.075							69.816					65.431										66.147	70.455				69.039
	69.063											72.603	72.446						66.746	65.805									68.935					65.604										68.792	70.393				70.561
	69.667											72.603	71.12						67.01	65.031									68.211					64.608										68.029	68.417
													71.974						66.982	65.967									68.206					64.573										69.596	67.861
													71.732							66.305									67.096					64.995										69.04	66.818
																				66.395									67.892															68.005
																				65.418									67.184															67.773
																				66.533
																				67.023
[truncated: 13 more columns]

## Sheet: 4E-CR(raw)
60.483	62.548	62.354	62.31	64.746	62.252	63.057	62.79	60.78	60.899	62.688	63.256	63.167	62.538	63.571	63.813	62.698	61.914	62.202	62.998	63.312	63.297	62.458	62.489	61.733	62.207	62.049	63.776	62.798	62.825	62.029	62.04	62.847	62.966	62.067	61.381	62.06	62.919	63.507	62.43	62.397	61.078	62.903	62.653	62.389	63.507	61.838	62.286	62.755	66.679
61.415	63.106	63.751	62.785	63.562	62.431	62.649	63.29	62.78	61.887	63.746	62.399	63.181	62.082	63.379	64.641	62.467	62.639	62.947	62.754	63.362	64.428	63.006	63.104	62.409	61.486	62.795	64.577	61.971	63.202	62.379	62.987	62.369	62.802	62.454	60.8	62.646	63.665	62.86	62.43	61.497	61.205	61.768	62.988	62.79	61.65	62.671	63.068	62.942	65.513
61.085	62.513	62.796	63.464	64.492	62.577	63.066	62.845	61.47	61.5	62.123	61.974	64.038	62.288	63.835	64.654	62.724	63.083	63.179	63.073	63.496	63.247	64.419	62.512	61.947	61.12	62.042	64.468	63.332	62.678	63.179	63.079	63.551	63.217	61.696	60.833	62.948	62.972	63.227	62.902	61.503	61.638	63.609	62.653	61.855	62.516	62.214	62.85	62.918	65.429
60.65	61.636	62.369	62.577	66.281	62.661	62.693	62.848	61.757	62.739	62.127	62.73	62.526	62.375	63.702	64.265	62.451	62.028	63.127	62.65	63.212	62.475	63.102	62.805	60.964	61.212	62.615	66.098	62.034	62.975	63.175	62.901	63.466	62.874	62.442	60.938	61.735	62.879	63.213	62.208	62.075	61.225	62.671	63.786	62.178	63.074	63.719	62.632	62.817	65.308
61.983	62.948	63.179	62.416	67.558	62.839	63.469	63.003	61.787	61.773	62.323	62.929	63.007	62.769	62.996	64.482	63.194	62.679	62.869	62.735	62.962	62.594	63.148	63.314	62.92	60.909	63.131	63.66	62.755	63.407	62.413	63.04	62.193	63.082	63.033	60.848	62.828	62.266	62.594	62.927	61.744	60.997	62.652	62.967	62.758	63.295	63.81	62.718	62.596	64.019
62.821	62.676	62.832	62.382	65.726	63.124	62.535	63.551	62.39	61.998	62.41	62.447	62.362	62.429	63.367	64.657	62.908	62.152	62.869	62.843	63.104	62.728	63.221	62.314	61.431	61.749	62.184	64.84	62.808	62.437	63.446	63.093	63.631	63.101	62.513	61.598	62.272	62.726	63.319	62.801	61.631	60.778	62.556	62.977	62.349	62.822	62.061	63.913	63.365	66.038
62.758	62.352	62.703	62.073	65.658	63.018	63.221	63.098	61.287	60.741	62.315	62.356	63.123	62.495	62.512	64.643	62.609	62.596	62.057	62.664	62.908	62.962	62.392	62.43	61.204	60.929	61.916	65.695	62.249	62.779	62.194	62.755	62.619	62.203	62.092	60.383	62.757	62.617	62.271	62.73	61.772	60.509	62.312	62.308	61.891	63.366	62.6	64.663	64.164	65.051
62.383	62.415	62.69	61.843	67.322	62.544	63.199	63.446	61.697	60.689	62.707	63.102	62.877	62.101	62.004	65.127	63.052	61.833	61.323	62.515	63.199	63.196	63.233	63.454	62.271	60.618	62.325	65.211	62.918	63.874	62.667	62.895	63.432	62.261	62.442	61.777	62.482	62.065	62.742	62.41	62.634	62.27	61.833	62.785	62.029	61.65	61.421	65.467	63.424	64
62.067	62.097	63.708	63.575	64.877	63.292	63.342	62.896	63.005	61.926	62.546	65.312	62.717	62.13	62.79	64.516	62.863	62.689	62.231	63.29	62.962	63.355	63.77	63.835	62.244	61.14	62.274	64.059	62.321	62.872	62.429	62.437	64.42	63.15	62.062	60.863	62.205	62.125	63.225	63.208	62.087	61.232	61.833	62.782	62.741	61.844	62.327	64.254	63.447	64.805
61.775	63.08	63.041	62.591	65.809	63.792	62.788	62.29	61.94	65.022	62.007	66.298	62.805	62.052	63.028	64.866	62.547	61.947	62.934	62.277	62.35	62.629	64.544	63.199	62.604	60.579	61.338	63.992	63.401	62.885	63.01	62.924	63.592	60.903	61.992	60.668	62.029	62.371	62.911	62.042	62.241	61.983	62.974	62.987	62.546	62.131	61.97	64.926	62.931	65.233
63.362	62.708	64.801	62.699	65.709	63.179	62.467	63.25	62.507	64.09	62.149	66.717	63.241	64.093	62.682	64.429	63.031	62.051	63.389	62.765	63.677	62.676	65.078	62.684	62.196	61.451	61.77	64.422	63.135	63.191	63.238	61.734	66.998	62.945	63.237	61.559	63.237	63.048	62.533	62.803	61.856	62.396	61.674	62.295	63.451	63.268	62.127	65.948	63.081	64.808
61.167	62.436	64.559	62.457	64.917	63.058	63.371	62.198	63.135	63.007	63.041	66.939	63.084	64.387	63.14	64.726	66.042	62.124	62.755	62.885	62.689	63.29	64.503	62.915	62.804	59.891	62.29	64.168	65.178	63.186	63.787	62.632	65.849	63.751	62.954	60.039	61.987	62.141	62.501	62.486	62.544	62.051	62.631	62.179	63.449	62.869	62.015	65.033	63.579	64.031
62.254	61.745	64.683	62.722	64.374	63.609	65.993	62.992	62.046	63.338	62.57	65.632	62.727	64.422	62.998	64.599	65.635	61.944	62.396	64.634	62.744	62.759	64.541	63.011	62.08	60.778	62.294	64.652	64.164	64.066	63.203	62.692	65.705	62.912	63.596	61.238	63.04	63.694	63.021	64.438	61.781	63.191	63.226	66.585	63.021	63.481	62.524	65.096	62.796	64.253
62.329	62.96	65.326	62.447	64.344	66.752	65.44	63.254	62.147	64.428	64.433	66.327	63.019	64.223	62.409	65.256	65.078	61.826	63.363	65.136	62.996	64.846	64.424	63.244	63.16	61.251	62.648	64.164	63.726	62.167	67.825	63.05	66.229	62.656	62.542	61.027	62.435	61.339	62.337	64.275	61.781	63.388	62.345	65.646	64.107	62.112	61.809	66.083	62.907	64.219
62.364	62.911	64.04	63.774	64.221	66.054	64.732		62.264	63.108	64.839	66.988	63.536	63.544	62.892	64.516	65.369	62.624	63.687	65.563	64.241	65.488	65.503	62.896	63.56	60.325	62.595	66.043	65.387	64.877	65.384	62.111	65.932	63.01	65.363	62.645	65.79	64.206	63.225	65.517	63.772	62.98	63.148	65.974	63.145	61.776	62.409	65.643	62.847	64.305
64.605	62.873	64.247	62.002	64.442	64.08	65.033		62.232	63.477	63.62	66.69	63.201	63.238	63.326	64.871	64.348	63.657	62.937	65.344		65.91	63.884	65.358	64.444	61.46	62.617	65.035	64.292	64.191	67.416	63.182	65.452	66.036	64.796	62.422	65.069	63.653	62.175	65.862	62.737	62.587	63.39	65.295	65.838	64.59	65.521	65.074	62.854	63.726
64.872	63.701	66.003	65.553	65.309	66.067	64.748		63.583	63.879	64.091	66.5	65.688	64.312	65.704	64.296	63.956	63.924	62.845	65.152		67.57	64.64	64.261	63.547	60.703	65.792	65.238	64.988	63.363	65.695	62.818	66.518	64.862	65.221	63.258	64.828	64.456	64.321	63.508	63.328	63.1	62.407	65.341	66.751	63.511	64.724	65.883	63.398	65.599
63.488	62.277	64.49	65.951	64.295	65.886	65.335		63.589	63.969	63.625	64.819	64.853	64.16	64.437	65.031	65.541	64.614	64.935	64.486		66.16	65.713	65.696	63.856	62.596	64.965	63.25	65.305	65.91	64.978	64.021	65.49	64.47	65.56	63.379	65.605	64.399	64.209	64.593	63.897	62.41	62.35	64.469	66.777	65.057	64.382	65.624	63.072	65.24
64.671	63.984	64.532	65.667	64.799	65.346	65.013		63.812	63.527	64.267	65.952	63.638	63.576	63.931	63.92	65.263	63.811	64.523	64.435		66.722	65.021	64.614	64.25	62.104	64.186	64.848	66.264	65.443	63.692	63.982	65.321	64.627	66.969	63.461	64.025	65.234	64.018	64.02	63.913		65.214	64.438	66.109	64.011	65.655	65.898	65.275	64.199
63.586	64.774	63.839	64.134	64.374	65.786	65.54		63.17	63.311	64.55	65.656	64.937	63.758	64.157	65.214	65.269	64.051	64.989	64.023		65.867	63.836	64.785	64.268	62.575	65.277	64.531	65.204	63.716	64.187	65.047	65.127	64.798	66.118	62.484	64.408	64.613		64.166	63.047		63.957	65.144	65.01	64.623	65.9	64.509	65.227	64.647
64.652	64.549	64.493	65.813	64.362	65.192	64.484		63.447	64.264	65.707	66.278	64.265	63.851	64.693	64.866	65.049	63.467	65.192	64.688		66.28	64.112	64.21	63.885	61.469	63.812	64.316	64.656	64.954	63.956	64.995	65.018	64.96	67.041		65.424	63.891		64.787	63.578		65.414	64.426	64.304	63.852	63.824	66.337	65.514	64.086
63.856	64.413	63.362	64.293	64.403	64.368	64.541		63.704	63.205	64.044	65.204	65.505	64.333	63.715	63.844	64.793	62.692	64.84	65.047		67.02	64.487	64.121	63.08	62.497	63.965	64.605	66.638	64.768	63.498	63.889	65.209	64.078	66.334		64.609	64.153		63.724	62.809		64.848	64.821	64.646	64.505	63.924	65.441	64.789	65.51
64.354	63.811	65.223	64.283	64.646	64.538	64.148		64.243	62.538	65.509	65.185	65.676	62.797	64.611	64.744	65.329	64.106	65.022	64.344		66.3		64.911	63.904	61.91	64.454	65.605	65.918	64.369	64.479	64.482	64.972	64.971	65.5		64.991	64.774			62.572		64.664		65.016	64.112	64.67	65.446	65.84	64.14
64.356	66.313	64.594	64.711	63.773	65.234	64.386		63.545	63.701		65.806	65.495	63.965	64.156	65.411	66.46	64.431	64.408			68.283			63.303	62.059	63.949	66.455	65.501	64.18	62.851	64.537	65.048	65.732	66.971		63.496	63.847			63.425		64.955		64.6	64.697	64.639	67.185	64.623	63.816
64.204	67.143	64.38	64.646	63.935	64.054	64.773		63.75			64.809	65.568	63.725	64.667	65.133	65.877	65.067	64.07			68.932			63.622	62.985	65.199	64.912	66.793	64.861	63.968	64.289		64.898	66.048		64.475	64.831					63.952		64.693	64.929	63.888	66.657	65.556	63.73
64.202	71.415	64.956	64.732	64.437	64.886	64.175		62.933			65.406	65.792	63.255	64.577	64.227	65.741	64.763	64.54			67.375			63.369		63.726	63.333	66.008		63.305	64.434		64.361			64.603	64.121					65.667		65.225	63.918	63.561	64.537	64.243	63.906
64.426	70.247	64.544		65.599	65.116	65.013		63.447			65.381	64.962	64.025	63.926	65.099	67.658	64.358	65.326			66.217			63.443		64.843	65.362	64.992		64.086	63.813		64.983			64.498	64.29					63.688		64.986	63.691	63.473	64.265	63.653	65.041
64.335	80.277	64.864		63.813	63.908	65.409					65.823	64.949	63.353	66.551	65.16	66.266		64.684			65.396			64.667		63.806	64.74	66.419		62.762	64.95		64.138			64.821	64.69					64.302		64.894	64.303		64.826	64.794	64.933
64.65				65.131		65.808					66.017	64.841	64.439		65.73	65.956		64.603			65.596			65		63.43	64.093	66.438		63.527	64.126		64.138			64.634	65.137					64.512		65.177	63.571		63.85		64.873
64.115				64.119		65.586					65.517	65.353	64.389		65.72	65.521		64.329			64.824			64.601		64.269	64.183	66.055		65.851	64.208		64.857			65.123	63.577					64.183		64.853	63.929		64.367		65.23
63.967				65.905		65.961					64.872	65.328	64.308		65.462	65.54		64.645						66.303		63.409	64.41	65.916			64.634		64.679			64.382	63.452								64.331		63.909
64.224				66.894		66.55					65.287	65.386	64.548		65.025	66.063		63.688								64.25	64.657	66.387			64.813		64.181			63.491	63.605										65.693
64.315				67.694		67.543					66.039				65.473	64.981		64.199								65.164	65.583	65.104			65.332					64.741	64.469										64.793
64.778				70.603							64.721				66.599	64.701		63.613								63.701	65.41	66.184			65.913					65.25	66.865										64.617
64.202				67.029							65.799				66.225	64.644		63.832								64.865	64.217	67.008								65.277	66.924
63.743				67.653							66.173				65.47			64.899								64.271		67.135								66.259	68.228
63.586				68.036														65.168								66.331		66.603								64.482	67.534
																		64.8								65.45		64.301								65.931	67.124
																		65.052								65.521										65.525
																										64.916										65.6
																										65.492										64.674
																										65.781
37	28	28	26	37	28	33	14	27	24	23	36	32	32	28	36	35	27	39	23	15	30	22	23	31	25	42	35	38	25	30	34	24	32	25	20	41	38	19	22	24	18	30	22	30	31	27	34	28	30
64.872	80.277	66.003	65.951	70.603	66.752	67.543	63.551	64.243	65.022	65.707	66.988	65.792	64.548	66.551	66.599	67.658	65.067	65.326	65.563	64.241	68.932	65.713	65.696	66.303	62.985	66.331	66.455	67.135	65.91	67.825	65.913	66.998	66.036	67.041	63.461	66.259	68.228	64.321	65.862	63.913	63.388	65.667	66.585	66.777	65.057	65.9	67.185	65.84	66.679
4.389	18.641	3.649	4.108	7.041	4.5	5.076	1.353	3.463	4.333	3.7	5.014	3.43	2.496	4.547	2.786	5.207	3.241	4.003	3.286	1.891	6.457	3.321	3.382	5.339	3.094	4.993	3.205	5.164	3.743	5.796	4.179	4.805	5.133	5.345	3.422	4.524	6.889	2.146	3.82	2.416	2.879	3.993	4.406	4.922	3.407	4.479	4.899	3.244	2.953
[truncated: 13 more columns]
