# Supplementary material for: Overexpression of Ssd1 and calorie restriction extend yeast replicative lifespan by preventing deleterious age-dependent iron uptake
Source: eLife. 2026 Jan 12;14:RP108892. doi: 10.7554/eLife.108892 (PMC12795504; doi:10.7554/eLife.108892)
Supplement: Figure 5—source data 1. [file elife-108892-fig5-data1.xlsx]

## Sheet: 5A
Control	Control +BPS	pGPD-SSD1	pGPD-SSD1 + BPS	CR	CR + BPS
PE-Texas Red-A	PE-Texas Red-A	PE-Texas Red-A	PE-Texas Red-A	PE-Texas Red-A	PE-Texas Red-A
-40.6444	47502.4	572.442	17383	269.552	32140.7
153.635	26973.8	120.898	27048.6	1065.68	74563.4
20.056	48085.5	23.422	57712	244.136	57485.1
496.768	21162.7	-20.9929	46760.7	1866.09	11361.4
162.61	26528.2	486.29	28930	757.422	101278
65.5413	59651.1	175.669	15157.5	184.753	106963
80.016	65585.5	122.787	19344.8	447.644	24394.7
81.8892	42061.7	17.5768	35463.4	594.814	42098.1
300.38	32918.2	171.643	105.134	457.263	62085.8
23.0554	75101.6	11.5552	185689	855.075	23512.5
250.174	67659.4	411.482	35143	265.996	18445.2
693.461	34797.6	22.1033	27972.1	281.028	32281.6
-37.1568	30929.1	328.21	27271	2031.15	80233.3
7.51729	25413.7	164.348	17281.9	396.031	47161
250.379	85627.4	241.732	31896.9	591.512	68533.8
184.06	228259	100.783	25521.5	14985.9	28170
218.34	43015.4	170.324	30734.5	928.987	23266.9
191.055	51275.6	417.29	25457.4	708.251	9669.35
111.304	36198.7	-14.6213	25501.6	868.489	29838.3
106.957	103034	138.648	21041.4	288.258	82307.3
70.8571	35812.1	-7.71305	21522.3	22.9089	73294.1
73.7972	32780.4	229.153	32418.8	698.036	40627.2
213.927	46166.1	60.637	25688.8	405.065	36101.9
2689.31	48935.6	1.56922	14382.8	424.627	26071.7
235.686	83880.3	136.344	34565.8	663.631	76296.3
107.658	40932.6	79.6918	31758.1	25.3304	53676.9
92.5655	163251	-37.5592	31890.4	364.875	30780.9
21.5178	180803	11.1217	37808.2	2308.21	54422.3
135.925	60487.8	619.867	16863.6	593.972	45212.9
-35.7483	55100	97.6237	17898.4	1478.02	14988.6
830.192	16980.5	17.7952	44617	863.392	24293.8
92.3547	83551.1	65.5413	12934.5	357.263	138735
365.817	37925.3	555.133	21135.4	14.0891	45161.4
45.7008	46847.7	152.59	39958.5	609.226	17318
62.3966	26560.9	26.5069	86799.4	1010.81	170440
277.069	64326.3	88.1364	16635.4	589.051	85506.5
1038.91	26099.6	158.02	31407.7	1004.71	13263
88.8397	28606.3	445.585	11901.4	1579.97	72919.8
769.628	26410.7	643.268	21261.8	2136.45	76038.3
12.8574	75083.9	95.1654	25684.5	1704.52	53872.9
0.855555	84316.7	29.8245	28488.7	332.611	85065.7
-12.6092	73794.5	18.0866	78374.5	429.29	50479.3
184.96	50064.3	449.569	404068	737.836	25123.9
211.512	24503.1	105.765	154017	357.6	40598.5
128.311	62383.5	209.925	255325	699.496	58013.3
22.2497	106194	76.6685	47356.1	846.423	216735
281.165	77357.1	52.8734	44041.7	382.621	21349.8
68.7735	60317.1	120.408	35581.2	836.966	28907.9
151.267	26622.4	199.84	15491	66.233	62120.1
73.1001	45596.3	75.2706	85860.3	234.586	80633.6
310.168	33525.8	127.123	63024.7	1075.4	182015
144.716	19292.8	101.766	85592.2	724.834	27785.9
23.7153	26402.9	205.783	50159.9	1092.17	28679
64.4663	75587.6	-60.0947	43553.9	435.082	41500.3
110.603	33205.1	6.29543	19482.8	416.022	34731.3
41.125	122773	90.4568	21009.5	27.7587	110246
96.0786	16172.6	126.214	29288.6	80.7961	27210.7
-57.8143	75041.8	341.673	20704.2	627.335	17039.5
199.702	46970.7	46.1522	104816	6.43908	110515
173.17	42906.9	79.0027	18143.9	129.849	167045
262.575	51578.8	125.514	89586.5	736.89	29231.6
-39.3701	24114.6	41.3495	25401	632.608	54299.6
179.207	36711.2	89.3319	65993.9	549.526	50555.4
221.028	45070.4	168.448	1054.94	533.847	87507.1
264.423	36955.2	111.514	13822	93.198	37340.2
150.431	39712.4	367.231	18836.7	65.234	16767.5
238.367	210209	37.1682	45028	1139.85	26418
147.993	27286.5	10.8327	44671.1	448.706	33525.4
192.785	49246.2	78.9248	34686.8	1005.71	35233.8
202.605	48820.4	159.133	27235.6	179.762	44651.4
33.6	73475.6	-10.8653	25505.2	1240.39	19328.7
478.964	36830.7	107.097	24357.1	1559.98	51778.3
179.692	55002.3	89.8241	90920	588.403	29222.3
132.853	80366.1	132.853	13086	900.348	65854.6
64.7733	31177.8	113.826	42200	1673.73	51190.3
-13.2128	36928.3	39.7045	30262.9	382.084	55143.8
-9.32273	61467.8	141.229	71043.2	6148.78	41818.9
-25.4866	34608.2	392.48	10064.7	174.489	60730.2
91.5113	29576	47.2062	14658.1	1121.61	45897.6
-21.1941	14838.9	28.791	43752.8	1865.28	135191
170.949	43269.1	346.536	30324	1585.33	38699.4
536.071	84317.8	36.8703	29153.1	1586.74	56716.1
747.724	30252.9	609.291	28856.2	1114.23	30058.1
80.9522	81052.9	72.9452	62708.1	-14.2859	55803.1
16.9945	83907	29.5291	33373.8	223.921	86973.4
139.834	69079	247.361	27259.2	503.94	72570.3
131.735	28248.4	-66.3322	43500	351.868	111026
217.513	81295.9	468.851	214229	307.383	105461
158.855	25310.4	126.353	21863.1	975.801	32639.3
622.829	28441	173.17	31895.4	1326.04	34380.2
585.422	45392.2	100.081	29282.2	838.979	91919.5
49.3933	87505.6	144.926	66059.2	158.576	45866.2
-38.364	61247.1	7.7331	44763.2	1215.64	45617.6
59.9494	65633.8	48.5631	8552.16	2390.37	39780.1
456.07	43627.4	205.506	14762.2	722.369	53289.2
700.956	79568.7	40.0781	27514.5	303.236	33321.7
85.3228	29641.1	431.288	16948	418.225	65204.9
142.066	112138	677.929	30820.6	553.569	69079
198.319	57845.8	807.724	184068	726.414	47004.5
41.8736	51016.3	83.2117	33104.8	1790.5	43743.1
76.1246	116216	15.4679	27624.3	80.3256	48267.6
2.21206	86213.1	-55.3327	181052	636.335	29487.6
179.692	74025	281.915	25289.7	1235.63	78951.7
137.112	33503	-16.8346	25107.3	18.8884	35441.8
778.28	71648.2	-18.9808	251561	945.15	88626.9
128.311	29534.8	146.18	17418.6	1940.8	75968.5
584.514	49532.7	51.0561	18506.2	982.441	94386.7
685.828	44162.8	42.8476	29238	1284.46	83185
126.423	37650.9	102.257	46312.4	944.413	16730
82.0152	114010	181.079	57483	197.974	30492.6
1474.27	30647.5	105.835	23273.9	641.6	38295.4
119.078	178872	119.008	30459.8	689.328	74174.1
173.795	29350.9	66.0024	23779.7	3331.84	38400.1
385.104	47156.2	138.717	29724.7	519.175	31194.7
1110.61	54767	502.296	25113	733.674	55548.9
365.885	40792.8	362.653	36543.4	283.826	38272.8
243.38	19594.5	24.6693	22071.3	62.1669	23172.2
243.861	88417.9	88.5584	30833.9	883.983	88914.2
339.442	37082.8	52.5703	18222.1	-12.0726	45267.2
609.936	74456.6	38.4355	14515.4	414.553	71157.2
16.849	13402.3	193.616	13944.5	261.753	31048.8
64.3896	52995.5	-22.066	26069.4	2719.82	20783.6
41.1998	21664.7	14.6694	13658.3	567.242	57607.4
153.356	47855.3	451.095	24665	477.181	67424.9
4.78862	26044.3	65.3877	29301.7	531.099	41102
94.3223	56878.6	-38.4311	29739.4	328.21	41232.1
154.47	20958.1	81.1083	12370.9	-43.9979	77344.6
60.8663	28742.1	300.72	29711.7	2962.41	18710.1
186	117032	1331.07	16568.6	516.683	75208.5
262.233	73385.1	282.666	45479.1	455.738	56185.6
67.5409	112171	55.5301	40653.5	-31.1875	60599
253.191	127181	118.448	340897	2394.6	249255
143.392	70647.4	222.75	32460.3	1983.46	50000.9
71.1662	30076.1	169.351	25996.4	812.016	17457.4
77.3682	104344	119.918	22162.8	481.605	38256.7
242.762	22368.1	-6.84114	317.907	740.672	155107
74.7275	50991	160.524	28688	189.947	112367
86.2373	84199.2	32.3397	48627.6	313.7	34257.8
122.647	35071.3	179.415	99609.4	2034.23	57849.1
53.1766	31678	47.1308	47432.7	31.6732	38213.5
578.547	46097.9	20.9328	36349.5	1450.52	9955.8
24.963	47582.3	120.548	22738	722.179	75963.8
220.683	111187	222.474	22457.9	646.859	42826.7
458.787	30150.6	25.4773	19124.5	73.8747	27892.7
199.564	38117.5	31.0812	22043.1	763.793	20948.4
137.95	175374	-14.6883	23651.3	42.7726	107085
283.621	63892.5	82.5145	87579.2	246.95	40960.9
133.621	257389	246.126	31046.4	575.885	102699
857.155	64383.4	108.079	29445.3	1153.74	22143.5
82.9054	71801.9	112.985	30123.5	132.783	89151.9
151.755	66778.5	76.0469	27406.7	595.914	76014.4
166.572	32782.6	17.7952	29289.9	314.31	59774.3
374.897	83937.6	-4.76197	72760.7	1693.11	12196.5
312.002	109565	108.71	30137.9	330.241	36450.4
103.239	37769.5	260.521	31567.8	1234.76	75344.2
248.733	37235.5	167.893	27207.6	184.545	94170.7
22.4694	45768.4	218.822	32097.4	938.578	97914.6
183.228	76167.5	1269.03	39877.9	413.418	259080
-3.08522	59815.1	27.1694	24634.3	304.052	34675.4
184.267	34488	-17.9748	26316.1	2939.75	22909.2
-30.1144	40288	12.1337	38090.4	1243.81	67266.7
54.0869	16661	77.6793	703.939	348.629	60199.2
192.924	44927.9	222.75	9358.88	606.773	87681.7
83.0619	93617.4	167.684	25325.3	1758.78	44404.5
87.3628	26638.7	3.71405	28803.8	223.645	33252.7
290.098	23121.5	229.772	155074	94.3926	95633.2
56.5188	35827.4	81.1704	258316	555.329	32665.9
298.134	28151.9	26.4333	28130	482.529	90375
82.5145	38745.6	130.058	28549.3	303.916	32015.7
249.076	37558.7	1743.62	1009.47	1809.21	110137
182.05	126835	62.4732	15345.4	1070.5	48351.8
6.0082	141250	-20.5905	27306.6	487.411	42364.5
38.8832	75587.5	127.961	25490	100.292	58619.5
361.306	72685.4	118.168	33654.4	550.895	35052.1
2659.33	51820.4	639.546	57217.8	26.1391	44661
87.1518	37141.8	442.263	32767.6	117.818	17000.6
117.188	52699.7	102.889	17547.3	199.149	21397.3
228.258	47140.6	49.0913	31689.3	419.959	59228.7
120.618	76248.7	202.743	30160.2	239.741	17923.5
107.027	63699.4	45.776	15777.6	1421.01	93610.8
154.679	84605.2	141.857	26864	1232.28	29393.4
250.928	43085.3	100.502	23746.6	1555.08	31008.4
68.157	19033.5	87.0815	29796.2	161.567	5733.81
124.535	38427.2	70.8571	96931.8	684.427	26358.2
80.1847	112643	46.2274	79105.4	317.703	38720.1
182.188	51825.6	1.85486	31453.5	484.575	60250.9
643.717	30195	689.009	39822.6	1189.49	64538.1
118.728	32290.5	179.276	368798	453.483	14398.8
11.9891	56092.8	76.5908	186603	424.827	50723.7
243.586	64773	164.487	99915.1	442.064	20866.1
134.389	36330.8	45.8512	55367.1	1518.93	127209
252.505	26037.4	53.7834	27775.9	931.334	34129.9
138.927	88608.8	185.03	16387.3	1335.56	415533
247.636	66326.3	132.923	25668.7	1241.06	47435.6
217.926	50276.1	116.838	15019.3	339.577	34032.8
81.6632	29103.4	162.61	35548.7	459.848	46387.3
73.6422	36377.8	129.569	391600	366.827	85304.1
13.7991	52527.2	97.1321	22853.9	114.807	40805.3
226.468	35169.9	121.597	64872.7	481.407	18815
91.0895	27762.2	55.4541	3651.16	1871.45	45623.5
181.703	47291.9	76.2023	17010.8	837.235	119488
177.265	207232	-25.8219	25454.7	1376.54	48257.3
580.558	52603	99.2387	9184.7	389.598	28044
-15.2249	313566	54.9981	26380.1	346.469	44922
3719.7	73662.8	144.926	11410.9	1351.53	173979
238.023	180080	438.873	30797.7	546.067	27334.9
181.287	64194.8	155.793	25033.6	1511.76	32049.1
908.128	100669	405.533	59975.6	289.417	30423.8
-30.3827	31283.7	350.451	35884.9	325.026	69282.6
260.726	26639.6	916.847	33873.3	1463.47	27539.5
174.212	39122.2	265.586	46558.9	2630.82	66243.6
131.875	23410.2	315.736	82388.3	177.542	84080.2
154.958	37265	203.158	69678.7	247.636	51596.6
201.43	54141.4	125.584	20533.5	356.319	116094
173.517	61884.1	64.006	85809.6	100.081	105977
91.5113	71449.2	43.9728	84210.2	1730.2	127439
36.5725	47335.3	339.983	24991.7	242.625	42955.1
126.074	65568	66.4637	2030.41	257.302	84640.4
110.322	29822.9	172.615	41770.3	2904.2	55658
99.0983	67350.4	193.754	10417.7	120.758	32692.8
166.433	29596.8	361.171	76149.4	2033.83	22792.7
219.856	25401.7	267.843	34121	311.798	80240.4
-43.7967	49104.4	275.839	122606	559.693	77229
404.463	47411	152.59	38351.3	505.255	60877.1
67.3869	45482.8	170.74	22256.7	1141.87	85967.2
39.6298	33969.3	208.476	32453.3	376.577	34394.4
38.7339	41204.9	627.078	114055	560.149	193646
115.927	83525.6	82.5145	24291.9	1208.2	11984.4
48.1106	21656.1	344.915	36541.2	188.355	41288.4
37.3917	48571	78.4576	44196.4	1714.51	151282
135.367	63112.4	357.6	38076.8	683.536	57460
164.626	24855.5	472.819	24410.4	513.992	71080.2
439.339	34849	-31.9253	154031	1195.52	54666.6
104.923	31585.8	673.847	27567.7	367.769	64638.9
-19.182	59866.3	118.728	30544.2	428.558	45637.4
104.993	37015.3	204.47	14702.7	64.5431	58608.5
33.3774	188225	285.735	16462.8	262.506	108154
100.502	50750.6	89.4022	34227.9	552.917	62550.9
100.643	140548	227.501	16127.3	1200.96	21488.9
158.089	71524.9	80.2552	27434.3	698.48	17937.7
400.315	43816.9	570.493	576.145	538.817	34554.6
134.669	42189.8	33.6741	45766.5	509.067	46196.3
245.371	45027.9	248.459	19214	506.175	37724
-40.7115	83443.8	98.9579	23629	666.634	73039.8
182.119	27056.6	79.7623	42384.5	731.276	14437.7
17.7952	59969.5	96.6405	22344.8	233.761	38312.7
66.6175	20671.6	216.272	31566.3	628.75	35367.4
381.077	69940.8	-23.944	28777.8	452.422	49900.1
109.762	85985.9	111.444	24598.1	342.619	41668.8
172.823	33181.4	165.53	27066.2	736.954	23299.3
287.235	40696.9	115.577	20606.4	931.871	71221.7
89.9647	60471.6	432.886	16136	135.297	47039
92.0736	38129.9	70.7799	94849.3	83.6878	57964.5
68.3881	29017.4	-20.5234	21252.1	1013.76	16932.6
626.37	70417.1	88.8397	39730.8	430.689	106250
52.7218	22130.9	129.779	41504.4	131.665	58010.4
958.766	129088	143.043	30872.9	115.507	140998
573.287	36550.6	60.2549	19819.6	560.865	72426.3
94.6033	38556.9	83.3525	82986.3	203.365	44155.1
536.071	53917.8	126.144	31175.3	477.643	59219
2746.11	66233.4	73.1775	37338	1439.46	56691.3
76.1246	144607	648.782	30653	771.104	38313.6
256.754	77120	30.7853	36564.3	719.966	96232.6
415.021	42021.8	-39.0347	81647.9	14481.4	52340.7
132.084	36134.5	257.645	24507	604.642	25024.5
314.175	39581.2	-45.2052	32125.5	223.301	106918
53.1008	206344	81.0296	28419.3	549.265	26615.2
-33.535	58640.7	134.25	30591.9	112.355	51415.6
-6.97528	40199.5	45.4752	25367.3	645.769	46266.8
37.0937	56702.5	1029.99	40752.1	743.003	24258.1
92.6358	47630.3	69.4675	82872.5	697.972	331132
120.058	22917.6	96.781	27196.9	274.883	62518.2
126.983	12958.8	28.4959	28407.8	197.697	38676
134.459	64446.1	228.602	78500.7	191.678	58664.9
143.81	65232.3	426.026	21126.6	364.875	34031.6
57.6609	30896.7	228.602	29771.6	258.193	13126.5
651.986	25526.5	6.36725	109538	727.487	35214.4
128.451	95329.6	389.062	36685.9	451.56	179224
136.414	24822.1	447.909	207597	1216.52	68392.2
124.605	19833.5	411.482	100.783	786.262	40575.9
80.4839	48817.4	219.994	35365.1	599.406	35101.2
517.011	51295.2	143.81	21912.3	180.732	40002.7
138.089	31561.8	22.3229	199.426	1069.97	17777.5
777.073	25700.3	375.569	19309	399.981	66589.7
348.292	41873.5	252.711	20184.6	421.426	163198
224.609	83307.2	13741.6	59338.1	164.279	20457.1
1547.98	69075	327.804	47622.4	485.565	56568.6
212.34	7183.06	392.212	7082.66	1198.34	41209.1
14.3792	60340.6	353.15	23534.9	353.082	77277.3
26.5805	67565.4	185.515	29230.2	0.498962	26123.1
96.5	47532.7	298.202	29757	292.891	42937.7
169.351	46555.5	49.3933	26176.9	656.339	46212
384.165	31466.3	80.7961	26274.3	1307.93	97868.6
358.409	24747.5	5.21885	34981.7	229.772	59073.2
82.7894	76927	294.73	49668.3	1238.05	2706.41
81.3112	40698.4	152.66	80181.2	905.177	22158.7
82.7894	54496.8	412.417	39531	1104.98	57260.2
49.6954	22413.6	270.168	50233.5	2325.32	25028.2
541.43	24294.4	310.712	9708.18	136.973	36616.8
73.7972	35440.2	168.031	89530.4	303.916	222804
728.435	34885.3	225.229	27780.3	1957.71	23657.4
66.1561	28950.4	101.766	80444.9	310.168	83624.6
29.4553	16354.6	90.1053	170548	169.976	54643.5
1164.13	78733.1	166.086	34839.4	155.236	71523.9
182.396	49963.4	55.1501	156793	131.036	55682.4
139.485	56353.2	268.8	24285.9	879.623	20811.2
363.528	24382.8	471.299	20311.9	285.803	20263.5
70.3165	34832.5	120.688	84946	732.917	32962.6
101.345	50161.6	49.3178	32508.5	1711.43	147624
8.23689	72350.2	23.0554	44022.7	638.968	50316.8
93.1278	94016.4	164.14	22204.4	1290.63	29192.6
117.188	47361.9	71.0889	32122.8	901.421	42206.1
191.955	41284.5	233.761	38584	2363.95	62762.6
46.0769	85084	2.99847	88774.5	703.939	80739.2
83.0619	66120.6	153.565	13795.2	790.085	39237.8
36.7214	56297	265.586	17567.9	1221.28	76716.8
83.0619	41180.5	198.112	39079	337.82	201686
56.5949	75946.2	9.46167	28914.3	-20.3893	47932.7
82.6487	37895.6	90.2459	31769.9	607.16	49958.9
628.815	32064.5	370.729	30192.9	806.584	25352.2
-2.14624	108012	8.81302	46609.5	619.931	49467.8
188.562	44868	83.1414	32243.9	1817.06	76389.9
82.7191	83931.3	-22.066	44267.3	503.085	87114.2
444.655	34064.4	227.776	31890.7	321.908	73906.7
242.007	34675	319.874	25716.5	439.339	92428
133.831	44663.6	-14.1518	13388	1565.35	38870.9
11.0494	31558.2	236.305	52927	964.534	56470.8
275.02	111792	212.892	39397.6	2895.41	23575.9
-21.5295	94057	99.3792	29748.2	1662.87	53218.6
179.9	48435.5	142.624	261129	-28.706	46090.3
129.15	65988.7	-11.7372	19108.5	365.211	81546.3
819.797	40076.7	4.43027	80674.4	834.753	38542.7
181.287	32859.3	62.8561	31636.7	556.567	36579.9
97.694	16886.5	155.514	24368.1	300.243	46943.3
127.961	60897.3	83.6095	19299.6	360.363	36105.9
745.207	36776.1	10.4717	58887.7	393.954	34436.4
181.426	144722	375.368	31088.9	962.79	187912
167.893	28143	138.369	34090.4	227.432	44919.4
332.069	47463.6	99.1685	60381.8	528.153	72629.8
164.07	33644.8	81.8892	51082.1	7.44536	55211
136.484	50547.7	459.98	15097.7	220.408	40570.2
743.633	66417.6	81.7336	41261	667.017	67069.4
-38.6994	67873.2	104.572	12666.2	1776.62	80544.7
30.4896	39123.3	39.0324	29678.7	32.636	94604.9
128.381	36869	527.433	175630	486.554	152922
143.949	34101	136.693	39197.7	1266.35	23221.8
43.8977	26535	99.0983	17244.8	635.05	26177.6
271.33	27080.2	331.663	28366.3	338.293	152449
122.787	47870.6	1789.56	27773.3	455.606	61499.2
101.766	35694.9	53.1008	34499.6	171.088	36991.4
-6.77407	93003.8	49.2423	38345.7	1051.59	45052.7
254.836	30337.4	23.862	84045.6	132.713	85240.9
99.9408	27867.9	67.3869	222066	187.316	120239
155.375	96182	636.207	31397.4	403.326	39066
1202.63	26381.1	105.414	22946	1044.01	29401.4
112.985	77946.3	26.4333	18941	359.42	29165
26.7277	29542	152.59	29270.9	615.678	34651.6
481.671	91605.7	562.623	11570.9	1487.08	54907.9
395.294	125605	-35.0776	72947.7	1236.57	37713.4
3.85724	20149.1	-17.1029	68863.8	-0.87191	69805.4
81.8111	17181.3	94.3926	54395.9	701.845	70251.2
356.319	28781.7	96.2191	21053.6	290.03	32879.7
271.603	68030.1	106.957	86052.3	1602.64	31453.9
830.259	53755.8	127.682	31911	1001.76	16913.8
103.871	85480.5	-45.2722	64343.2	625.533	63348.6
162.471	81463.4	38.1371	71458.4	1526.24	57157.6
80.8741	70311	190.57	69817.2	1273.53	48436.9
111.794	31657.5	202.536	22792.1	356.319	25613
645.705	30836.6	169.768	23922.5	644.871	34607.5
-29.5779	25177.3	199.495	30601.5	472.687	52177.8
176.501	78739.9	130.268	21775.2	677.483	229220
31.3031	29705.1	351.531	14180.4	869.428	72879
5.36231	85872.7	664.206	30810.9	376.443	26158.4
182.05	48531.7	160.455	50497.2	785.457	39722.8
87.9958	13628	82.5079	26268.2	3102.32	47253.6
227.639	71330.5	122.717	13491.9	-3.3535	72999.5
80.1719	36037	105.835	47998.5	701.083	67911.1
127.892	62908	30.2679	39875.6	127.612	46585.8
458.787	61924.6	361.777	56231.3	1452.07	43279.1
86.9408	30925.2	668.231	5140.98	2115.72	129068
96.781	30210.6	62.2434	25262.5	453.948	23169.8
-8.11547	83428.9	525.337	26272.1	189.116	48360.7
83.6095	20250	169.282	22902.4	27143	27889.8
831.198	37319.3	40.9006	23233.7	211.857	122130
126.284	82710.2	110.533	53535	85.5338	83095.1
-3.3535	15999.1	39.7792	58280.2	2239.94	26586.3
90.738	50195.4	164.07	27134.8	650.256	29388.4
120.967	25196.2	412.083	195708	31.5992	35481.5
109.411	44044.2	68.3881	21258.2	783.445	23593.2
560.084	27714.8	18.7426	30020.7	310.372	49783.6
92.5655	30490.1	76.2023	165620	1912.77	15160
309.625	80747	50.7535	27693	308.13	111437
198.803	23248.4	136.484	58125.8	1085.66	74637.5
14.5968	100406	467.33	31834.5	158.924	46578.6
385.909	50771.7	159.133	17442	47.4322	11989.2
227.707	89898.5	140.462	35551.4	300.107	26239.3
430.755	44430	648.91	22385.2	135.367	66073.5
21.2253	39793.3	118.518	22245.3	1050.52	91133.8
710.786	42968.6	222.957	19282.9	229.428	60442.6
18.7426	15228.4	199.702	23401.1	567.112	28554.7
366.423	50854.1	99.4494	37247.6	1279.76	56405.4
193.062	79684.4	31.6732	1120.67	560.084	25404.1
-20.6576	39106.4	3.07	30063.2	568.998	28099
173.517	22828.1	275.43	631.515	160.524	24980.2
114.106	25413	6.29543	30705.3	484.509	49006.2
682.708	67721.6	164.696	27830.5	554.221	34571.5
104.643	85071.5	185.93	35302.9	1872.06	30430.7
73.1001	49949.1	169.629	29502.6	876.27	10315.6
54.011	27130.8	47.7336	17694.4	234.036	166831
162.61	36044.7	199.909	24174	858.429	18507.1
93.7602	44481.6	105.344	31925.3	631.194	69051.9
491.63	71407	63.5459	22983.9	3266.44	264568
-28.1694	27714.4	240.153	27420.6	325.568	37554.8
178.236	66682.4	61.7077	289938	148.829	60002.4
34.7878	29424.9	112.775	31722.4	373.217	61434.1
79.782	13197.4	23.7886	32210.9	854.673	26575.1
163.653	36999	100.222	333827	805.645	313705
257.371	47265.4	778.482	80447.1	115.157	17924.7
4.28697	41036.6	69.0819	24533.7	1674.74	69572.9
170.601	64303.3	-45.6747	23191	1010.54	39812.8
36.647	128445	213.72	23955.8	738.34	72449.1
225.16	27593.7	49.9976	33746.9	212.892	18638.6
82.9054	29225.2	816.309	32987.3	1504.38	67452.9
117.398	62232.6	-5.63388	60313.2	108.289	98373.5
585.876	29740.3	19.1801	27669.9	283.826	70664.3
51.7371	37035.9	160.107	42984.1	318.111	55253
498.085	294328	303.644	25831.6	189.947	70916
178.652	72672.7	207.095	33829.1	3420.3	173833
102.818	20852.1	165.043	30011.1	462.166	25001.8
-35.0105	73907.7	50.5267	21310.2	654.867	179669
18.5238	24007	186.207	15250.7	388.19	68039.6
338.563	28835.9	176.848	27129.9	1304.18	78088
844.814	26736.7	141.229	26871.8	291.87	22697.6
18.3052	127796	-62.4422	27650.7	816.376	60727.7
712.243	57174.7	400.985	25913	1531.68	36784.1
-27.0963	73472	34.9364	203036	941.864	70629.8
81.3425	28070.7	560.54	68461.1	2077.9	44374.3
79.4806	36799	58.042	47486.5	49.9976	93912.9
172.684	40723.4	-11.6702	49930.6	463.159	39268
252.368	71916.3	198.388	28360.3	489.389	102614
676.781	87705.7	382.554	57013.8	991.697	23765.3
-0.87191	44165.3	200.048	28551	1390.23	43686
80.562	4985.38	56.2906	35077.7	331.866	39176.7
224.816	65884.6	99.66	17426.7	-26.1573	89644.5
83.2965	34749.2	163.236	43647.4	395.83	39347.2
36.7959	45963.5	418.958	164257	214.962	47173.2
297.93	17450.3	590.087	17077.2	478.172	90453.3
35.085	42352.9	-43.3272	21529	1873.53	26174.5
207.647	33284	118.028	20370	191.332	109413
194.723	41422.3	284.644	20786.5	800.346	51098.7
223.645	41172.5	337.752	31324.2	198.665	67836.9
223.645	25807.8	234.243	19606.2	898.939	37463.6
127.053	30097.2	8.23689	18733.7	902.427	72256.3
246.332	40271.2	32.1174	8852.1	-170.291	20222.5
544.565	58740.1	165.182	35520.8	204.678	29128.3
72.6356	60250	111.864	34926.9	796.926	38165
74.8051	32947.6	71.0116	22767.1	274.337	87947.1
141.578	80390	115.577	28734.3	329.632	86991
56.8232	38800.1	69.3133	25031.3	6.72646	30908
611.55	39337.3	45.4001	17429.5	45.7008	50688.6
-53.9243	36955.5	206.68	239287	3894.82	83635
40.0034	39945.7	-0.53656	19360.2	289.417	56601
217.72	18091.1	212.064	43900	744.892	71958
540.973	48934.4	35.3079	21970.1	261.343	39537.7
376.577	46316.2	114.947	325.094	656.083	67004.4
82.5783	34951.2	184.129	47708.9	808.126	86545.8
468.719	60618.8	35.1593	25698.5	304.392	45499.7
86.2373	26379.5	164.001	26673	663.439	46367.8
403.594	29934.3	167.267	27148	677.865	12752.9
32.2656	67594.2	143.182	50201.6	506.438	32660.8
248.802	35110.6	-23.7428	23557.5	1292.24	57278.6
741.113	13765.1	278.161	28668.9	526.909	36015.3
-15.5602	29491	188.632	31233.9	310.168	22974.3
85.3931	34410	100.292	42376.9	1921.69	23939.2
-111.47	65075.2	1034.49	22362.3	351.328	30971.9
462.828	33562.1	510.38	35555.5	320.349	35551.6
56.5949	34652.9	2.42646	31612.2	1256.09	248299
232.867	108024	21.8837	23857.5	463.424	18695.2
21.9569	28164.2	1278.09	25797.5	85.1117	17673.4
-56.8754	29074.6	504.795	23340.6	44.5735	22305.4
245.852	61656.8	75.193	39241.6	1667.83	143192
60.4842	49727.8	71.0116	57150	129.429	52485
895.183	63557.1	50.7535	29972.5	511.628	84891.2
64.4663	50230.1	-0.87191	44769.6	1606.86	25541.8
456.202	42940.7	124.116	41174.1	584.061	34150.6
99.66	24105	62.32	25841	921.743	9220.98
36.4237	110806	267.843	25517.2	583.347	55148.2
131.176	54981	466.403	82757.2	986.398	55495.2
157.811	77378.9	-22.1331	32945.8	551.743	42771.3
4.71694	65324	209.856	71746.1	316.686	91834.4
351.261	33514.4	138.648	18365.2	73.8747	39442.6
41.0502	97904.9	25.1099	20753	324.619	17923.1
148.55	77062.5	16.7762	57996.3	537.575	46388.5
213.72	55448.2	209.235	37715.5	-153.121	23491.1
57.1278	17330.9	39.6298	36618.7	316.211	67107.2
315.532	48452.6	265.244	40675.5	500.191	89292.8
221.165	57908.2	142.485	79161.3	170.671	45978.9
-7.44477	33568	140.183	21594.7	672.061	61574.1
272.082	93617.6	606.192	27693.9	1756.43	33457.9
267.911	38164.7	-2.88401	34578.1	1597.61	25631.1
188.147	55062.4	161.22	29961.2	2377.83	41724.8
150.57	27727.2	113.966	24119.3	278.98	58162.6
227.157	15787.2	82.7894	34896.3	355.308	58994.7
187.454	30344	527.826	26208.1	400.516	18476
211.926	67621.8	203.365	37663.6	530.576	51449.9
244.891	68696.2	160.524	41956	781.432	33488.5
126.913	95095.7	58.8808	17949.3	2.56942	115864
69.0819	63162.2	384.5	24093.7	64.3129	98500.5
97.3428	40547.3	16.558	52503.9	663.567	46293.4
29.0862	33345.6	61.9372	50982.6	221.579	70813.7
24.2288	17967.9	112.915	17460.9	1277.95	36607.1
253.67	31223.3	181.495	18877.5	398.575	88665.1
116.417	40009	214.41	24451	383.964	9271.02
83.9859	57255.7	-32.3277	24392.8	1631.95	44162.6
-12.2738	175131	183.921	25573.4	250.517	34821.4
89.6131	41910.7	294.254	44128.1	773.317	36664.4
392.011	18391.9	21.079	31809.1	1001.96	120148
382.755	73119.5	212.685	51428.7	256.96	24967.9
91.7221	32515.8	219.029	72337.4	992.435	68848.4
17.6496	77768	337.684	12393.2	308.674	24079.1
6.08	53531.2	66.9252	44563.6	578.482	27554
31.9693	59778.6	302.624	22367.8	426.626	35364.9
30.6375	77065.8	135.367	54296.6	428.624	124135
172.754	16947.7	177.75	76621.8	731.465	318267
435.481	59333.6	213.306	29822.7	1292.3	21840.7
243.724	77410.5	36.3492	30596.1	162.124	21358.6
162.332	91800.5	115.297	48372.7	22.2497	30087.7
18.8884	25202.6	-10.1276	44905.1	300.107	55405.3
59.873	54899.6	443.061	45647.6	248.322	77035.4
249.556	27996.9	33.1549	61947.5	1095.86	57177.7
57.8133	61210.3	179.484	51094.4	222.13	51205.8
96.9215	84383.2	306.771	22080.7	160.176	84673.6
88.2068	61112.2	98.326	25112.2	691.744	57735.5
59.1097	70040.3	88.8397	37618.7	590.605	21640.3
129.779	59376.5	45.7008	101642	617.16	38493.1
177.265	38593.9	85.0413	59343.8	184.337	22256.6
230.116	61355	116.838	50566.1	309.489	38042.1
112.495	80905.6	153.008	27148.9	669.955	44379.5
55.6061	19851	115.857	18183.5	1965.69	84120.1
209.304	63196.5	121.947	24701	500.585	30538.7
107.027	30794.7	743.003	21735.3	76.0469	26495.2
33.8225	48638.2	210.753	50584.8	1001.15	75284.8
120.898	23280.4	241.87	27304.7	746.403	98937.8
80.6776	72525.4	46.4532	11403.8	1512.23	69597.3
730.708	30308	204.47	180535	480.813	42680.6
95.4464	122125	337.955	23700.1	263.465	55357
351.463	16073.4	14.3792	29267.8	353.622	74346.8
144.298	46461.3	-47.888	26439.2	119.428	35636.1
466.006	41872.1	16.849	25778.2	639.802	85853.3
61.5546	85007.5	-11.2007	25812.7	0.071261	38780.6
102.608	33644.1	266.68	30935.7	1150.65	120586
37.7644	85507.9	20.8597	30869.8	59.9494	102665
-17.0358	74971.3	169.282	20100.1	137.322	20782.9
87.1518	34263.2	135.995	53545.3	517.929	25692.7
104.222	80940.3	440.136	28896.6	117.468	33178
932.005	48461.7	262.369	17069.9	861.782	86380.9
110.463	60253.2	101.485	35470.1	1011.28	54119.2
2.78392	60575	178.513	79462.9	769.628	75282.1
64.2361	21959.4	101.134	19855.7	895.317	81223.9
156.002	46120.5	155.097	15789	326.313	103271
92.9169	37557.9	663.822	158400	378.66	40663.9
131.665	50922.4	113.546	52635.2	1773	26705.8
259.699	59050.5	142.066	79964.7	1249.58	49104.1
168.379	16210.2	112.285	24573.1	2244.03	30067.4
179.623	47531.1	433.684	67920	1002.83	59723
494.266	36949.5	122.857	44350.1	535.025	30175.5
9.31748	59642.9	187.662	34051.3	2099.02	243890
780.158	31066	269.416	24724.1	287.099	284713
207.578	28407.2	73.1001	47656.3	1028.25	137278
273.312	47691.2	37.0193	22159.3	1037.44	86618.5
139.974	80993.7	62.0138	653.651	594.296	101662
19.983	73541	508.081	47400	73.4873	29044.2
11.1939	38055.5	75.8916	40717.1	-47.7538	99626.5
369.047	114510	255.452	26761.3	463.954	23876.1
209.994	37360.5	-9.45687	31610.5	1058.5	40158.8
49.3933	16604.9	298.338	25804.1	1402.43	29172
-36.8885	45113.6	129.918	38686.8	780.829	59571.9
39.3311	25041.5	22.5426	129447	552.917	57683.5
201.845	37292.3	359.891	197426	292.96	70945.3
159.063	60447.1	24.5959	24484.3	306.363	42962.5
8.1649	20918.6	135.786	21140.9	1463.06	50533.3
392.882	26393.9	224.541	23370	1115.58	33735.4
108.85	41407.7	65.0804	86707.7	604.512	84602
34.0452	71513.7	150.849	26616.8	1878.5	147382
129.569	75899.7	216.823	34024.2	885.19	47998.8
335.858	215668	81.3425	11732.3	243.655	73960.3
419.959	29102.1	-17.3041	73461	647.436	84648.1
234.793	31864.7	354.836	24480.6	1521.89	45554.7
54.011	20155.9	-25.4195	47863.7	160.246	118869
32.4878	101419	97.8344	26057.7	390.469	41431.8
158.785	54676.2	659.283	220321	521.995	80813.3
117.888	25742.5	376.846	35569.9	811.279	39949.3
236.374	63473.8	175.877	25608	886.464	68180.7
61.7077	40110.7	12.5679	73020.2	997.867	45295.4
99.1685	36924.5	86.4484	24274.4	361.171	41360.7
47.4322	47858.3	-45.4064	37235.2	1992.11	47244.5
74.4948	54916.3	211.65	16798.4	241.526	126556
183.228	45511.2	45.5504	31872.8	1349.65	187981
107.448	42211.8	827.107	28679.9	1094.38	35570.8
-22.2672	25015.5	88.699	54376.3	464.086	51962.6
849.374	47818.7	39.5551	57756	309.082	25818.5
192.509	40996.9	147.087	26323.9	747.85	80333.6
514.451	17990.2	59.7967	13692.3	802.627	139644
-14.8895	124758	48.4877	40249.1	1139.12	42840.9
49.8465	59793.4	63.086	67385.8	573.872	79957.4
437.61	47057.7	552.2	34711.1	623.28	62357.4
57.6609	26307.6	384.769	27894.2	2218.74	82407.5
375.636	154126	1741.81	32733.9	974.259	109893
26.0655	2467.91	185.93	26951.4	1001.35	179319
465.278	34670.9	79.6918	27818	234.861	59129.9
69.4675	63718.8	58.9571	29515.5	316.957	36492.8
230.941	89346	364	35270.8	2614.12	43948.1
106.116	29144.7	167.128	22594.9	3211.11	70703.8
-13.6152	60396.2	-35.5471	69751.2	180.732	27594.1
99.2387	69902.2	126.703	33328.6	2229	29255.4
76.28	34467.1	73.3324	21756.1	1273.79	50619.7
-1.3414	33953.4	28.1273	23988	710.279	13996.1
324.823	59028.9	122.017	26782	1461.92	29341.5
161.081	51321.7	76.7462	30551.2	391.408	22978.6
9.17332	32324.7	6.22361	355288	1039.45	31297.4
86.5187	21299.8	636.142	29909.9	989.282	55175.4
105.484	66562.2	9.10125	76846	672.061	23016.3
24.0821	71413.8	13.4368	18484.6	2297.55	124908
133.97	49958.1	264.765	44606.4	662.544	50823.2
184.614	41150.4	-45.004	65738.1	748.039	61659.7
62.6263	57329.1	85.1821	65955.2	158.785	35416.1
31.0812	50221.3	-14.2188	25552.1	525.926	25467.7
80.1719	29838.9	-29.1084	47211.9	898.805	92700.7
13.2195	42870.4	246.263	22813.3	719.586	17761.7
162.054	44188	130.827	31724.5	1497.74	36619.8
165.669	47399.7	407.673	18269.9	201.914	38769.1
79.2365	76012.4	200.048	26544.4	394.758	20989.4
152.451	55435.1	127.192	195259	1345.22	24395.7
12.3508	55942.1	289.417	29648.2	975.198	43291.1
311.798	21377.2	139.625	41209.7	2195.4	17991.3
161.776	142962	204.332	451648	544.631	68776.9
167.476	130011	20.4943	18858.9	34.4907	52303.4
23.2753	133651	215.72	49435.2	582.504	96722.8
245.508	30738	493.146	22934.3	-23.5416	33816.6
87.5035	72086.1	355.578	8115.2	141.927	76594.1
246.95	59899.1	238.229	22517.6	2468.38	19402.3
566.722	27461.9	65.0037	192483	1615.52	44768.8
-52.3146	47357.8	201.292	146705	1226.58	110868
345.253	76139.3	139.904	22250.1	603.091	29177.1
403.995	32389	1376.75	33248.9	794.377	15580.6
734.62	71156.2	131.595	68883.4	2957.05	66740.7
768.019	98926.4	363.259	264760	1840.13	45184.9
320.688	121391	82.4375	36120	351.598	57031.6
591.642	89028.7	105.554	77586.9	101.064	63828.4
80.8741	40257.7	46.3779	25899.8	507.95	45429.7
145.692	35345.3	66.3099	22357.4	694.478	36866.4
1384.86	40304.1	489.455	74316.1	82.1237	82439.2
27.3167	28288.9	119.498	26868.6	69.0819	98242.1
64.8501	18056.6	138.159	20536.4	-23.005	86575.6
518.782	138215	75.193	34362	196.314	25853.4
297.181	30493.3	92.6358	29492.6	93.4088	69017.8
1130.33	73945.2	121.387	28423	1396.33	144793
80.718	98984.7	29.3814	16332.8	439.006	14801.7
392.748	69555.2	96.5	22249.3	704.764	108356
48.2614	43006.3	61.5546	65781.5	169.143	52957.8
211.719	30360.7	109.902	38251.8	382.957	27740
93.8305	61317.4	309.082	8844.72	829.656	213120
349.844	10379.7	137.042	23051.1	658.067	76381.6
140.95	29828.8	4.28697	128912	59.7967	50038.4
246.675	72830.7	87.2925	31584.6	205.299	138864
305.072	28885.8	66.5406	39785.9	986.935	127656
77.0571	50879.3	116.067	18267	838.241	50310.6
109.551	344477	349.641	22171.3	1560.99	52189.2
506.044	71627.8	150.919	65582.5	167.545	62751.1
76.9016	53067.4	166.781	38633.8	1029.99	69056.8
34.5649	65975.9	48.0352	24565.7	125.934	54453.3
271.262	24683.2	61.0957	17444.2	259.083	135567
376.04	29941.1	311.459	81980.4	79.9735	57318
190.847	91981.9	672.444	34983.5	343.294	30095.8
111.934	26843.4	83.071	13640.6	811.882	75369.4
115.787	29543	326.042	19630.5	1884.33	27238
88.6287	195234	487.345	46481.5	1716.92	30793.5
78.1462	101076	224.541	84581.1	1310.41	4122.12
137.252	30974.6	-29.9132	55380.5	6991.85	37755.8
83.6095	25136.8	34.9364	35420.9	1230.8	79875.4
58.1944	58201.3	144.019	34923.4	2740.61	83900.5
68.8506	32008	50.0732	31777.6	-107.983	63814.6
197.144	42269.5	1017.45	467301	1581.11	57047.1
107.869	35156.3	-6.90821	51667.6	301.264	129382
67.0791	50769.7	-26.3585	301764	348.089	59109.7
264.628	94408.3	5.5058	26476	727.74	131603
69.4675	73208.8	45.5504	39049.3	1138.11	82016
87.1518	79232.6	136.065	32403.3	273.448	147836
43.3725	35363.8	207.371	20857.3	95.7976	239336
4581.82	48817.9	83.3748	85814.6	347.144	63683
93.3386	35665.4	3154.03	53928.7	717.815	173456
108.85	62709.8	75.193	37892.6	188.632	229156
195.276	44285.4	51.1317	54002	1025.1	69196.5
263.122	190313	310.712	27518.6	474.009	24135.1
111.093	30080.2	297.181	61713.1	787.201	58401.3
176.432	29971.5	-3.15229	36967	280.55	120020
204.47	28832.7	119.498	61186.4	1484.66	63359.4
1376.08	37001.6	161.776	16153.6	953.266	87432.4
144.926	43926.2	106.607	43082.1	558.195	30900.1
34.3422	232861	462.365	50137	666.634	44386.9
164.14	43282.4	224.265	25654.5	759.098	26404.9
26.6541	28071.3	154.818	49403.4	1350.86	57702.7
328.481	44166.2	681.561	43396.4	854.136	35335.2
55.0741	42974.3	94.252	30035.7	1301.16	20625.7
97.6237	67331.2	576.794	19659.8	1458.71	64831.7
147.714	96754.6	111.304	21946	256.891	62374.8
85.3931	31412.5	52.7218	29049.4	559.563	38922.3
69.4675	34877.2	90.1756	27651	404.397	48787.5
215.237	71278.8	102.327	24538.5	1463.27	37739
92.9872	69139.2	58.8808	26141.5	450.432	17147.9
84.3377	26545.8	280.073	70882.6	16.9217	15796.3
-6.17044	95898.1	166.642	42175.9	546.067	106218
77.6793	22510.6	124.186	198296	130.757	39468
186.207	52940.5	54.0869	36464.8	1459.85	58237.9
250.379	34672.9	546.524	48445.6	560.735	25212
1997.41	27256	115.647	26896.5	334.844	16872
75.814	26789.2	33.0808	65644.1	931.267	23475
162.263	29099.3	126.983	21875.7	176.224	58462.5
88.3474	37446.3	-13.0786	33559.1	868.087	49485.9
546.263	24419.7	5.57755	351849	1595.6	49215.6
91.6518	39532.1	250.242	28234.8	307.655	80718.3
194.1	34157.1	168.657	37453.6	365.009	39344.5
158.576	100285	1158.3	54456.8	877.208	45768.7
20.3482	31969.1	34.1194	14326.5	224.885	57876.1
134.878	22015.7	28.1273	76429.7	485.894	25268.4
117.048	85913.3	-7.64598	23981.8	641.92	29599.2
118.658	118448	499.664	9196.57	601.346	67684.6
106.326	53656.4	213.927	21517.6	286.417	50503.4
138.089	15498.6	51.7371	62460.4	1428.26	111777
123.346	88008.1	102.397	16530.9	1658.51	53958.2
166.225	25369.9	26.5069	35465.7	251.545	45143.8
209.58	26578.6	127.682	113419	192.509	38572
-13.2128	74815.6	154.192	38234.8	1705.25	30634.4
69.9305	31043.7	545.479	35163.6	1324.63	71527.8
-14.2188	38404.6	19.545	41503.4	523.437	73463.4
453.682	63236.8	96.2893	31979.6	82.9302	43336.5
241.389	35155.2	-7.98133	23466.4	837.704	25767.5
667.592	39619.3	341.875	30320.7	287.917	42639.6
21.1521	59157.9	70.0849	51752.6	203.434	18692.5
133.412	113374	242.9	20847.5	678.439	198008
160.176	32256.5	40.6014	27739.5	-24.8159	63133.7
103.59	89817.7	184.822	26136.5	772.244	19570.9
96.8512	95475.9	97.2726	57392.9	139.834	42096.3
129.499	19310.1	292.142	43319.1	182.188	103876
460.179	38484.6	93.3386	25778.1	2742.96	58508.8
207.302	159083	358.678	32167	1644.69	82213.7
4137.95	38911.9	732.727	23794.5	1053.07	70320.4
3333.51	43296.1	103.801	11804.9	246.812	20323.8
196.867	57256.6	1993.72	157794	478.37	47408
65.0804	21635.6	182.396	42789.3	194.169	32201.6
90.6677	69793.7	56.2145	3098.43	-17.5723	27446.6
20.9328	63886	99.5196	35905.5	615.935	121107
124.885	74570.1	19.472	56150.6	1037.91	11004
40.0034	153775	53.3283	130724	517.339	40213.3
97.3428	64464.9	315.464	24040.3	1334.49	37438
314.175	45143.6	117.888	63045.4	269.279	88014.1
105.484	57443.6	117.958	22025.2	291.665	80101.4
24.3756	18075.8	114.667	12727.3	238.779	56353.4
60.7899	44572.6	139.066	28107.5	440.336	61390.5
263.533	24827.2	396.299	22073.2	339.577	22265.8
139.346	45913	319.738	42829.1	57.6609	58238.7
105.625	49478.5	144.995	26553.9	796.523	57222.4
-45.7417	126435	10.2552	36799.5	325.297	51920.4
128.451	78523	22.1033	9746.34	309.965	61383.7
-5.76802	76229.5	111.374	23432.9	344.105	85470.5
235.892	63861	38.9578	61842	972.515	69713
11.3384	17162.1	127.262	35048.8	336.196	17027.7
50.6023	12962.4	39.7792	48416.1	1598.35	77125.5
75.4258	83788.7	149.386	38673.7	597.402	44483.8
93.8305	19518.8	10.9049	44149.2	864.398	17065.6
353.487	39119.6	119.498	37312.9	1217.52	107963
-23.005	54088.7	101.836	23938.8	842.399	34035.8
181.98	82413.9	261.822	24062.5	1004.57	34467.5
320.823	25169.1	194.169	18187.2	1231.54	75359.7
198.319	18360.7	79.8327	765.135	2414.99	36205.6
46.3779	58941.9	580.493	106349	616.773	40935
188.078	31847.2	79.6214	56539.6	403.059	68570.4
87.0815	109464	61.7842	12832.2	999.41	54430.9
166.155	49909.3	543.455	102468	1472.25	25548.6
61.1722	77461.7	137.461	19156.4	42.9975	75277.6
597.207	25682.2	57.1278	29526.7	424.36	32818
309.829	21901.2	109.341	22416.6	366.76	18679.1
373.486	23848.4	90.9489	31006.7	874.056	98977.2
-32.3277	66244.1	388.994	33888.1	80.396	28004.1
-45.6747	41589.2	163.862	41381.9	72.4808	82023.1
193.616	74587	195.691	49359.9	181.634	63485.2
39.6298	51054.4	165.182	24045.9	415.088	117404
156.489	62629.4	47.7336	26521.9	629.072	22390.5
15.7584	97074.3	209.097	49552.8	464.484	58517.6
234.586	31575.1	399.512	69418.1	794.042	83143
81.5224	70553.3	608.129	66086	390.402	20972.7
250.311	42677.9	101.836	36010.2	651.537	34710.4
397.37	27835.8	2.35499	20619.5	192.162	18717.4
42.0233	40397.6	370.796	36100.5	105.905	123203
335.723	52523	746.466	21089.8	166.225	87307
96.781	24940.9	3380.53	21324.4	2247.85	72849.8
65.4645	18429.6	108.36	37631.7	1031.74	123749
173.309	100405	302.488	29319.7	750.995	129515
1169.43	56393.7	137.112	34872.1	984.051	58376.7
470.241	245471	629.844	7401.24	2049.52	70761
145.692	43047.8	246.812	1126.98	437.277	101981
88.9803	49105.7	112.215	20005.6	210.684	154241
339.104	91772.6	23.7886	19694.2	1905.39	26024.3
184.545	24626.1	42.0233	61821.4	787.402	66703.4
137.112	36526	418.625	97573.3	1548.24	100486
79.938	40157.5	145.414	72715.9	1401.76	39606.2
117.678	11282.3	-26.3585	58575.7	22.9089	68366.6
44.198	21333.8	-14.0176	17597	678.566	40069.5
206.404	30434.4	303.984	41187.5	238.779	38069.7
226.468	34694.1	20.2021	35337.6	9.17332	22001.8
26.0655	40028.6	2.56942	66509	862.118	89936.8
85.8152	42585.4	54.5424	23016.9	237.817	91915.5
56.1384	58008.4	76.5908	16886.6	330.715	37063
177.889	10684	136.693	30632	573.547	78984.7
75.193	19421.5	227.639	22698.1	117.258	19451.4
126.913	25572.4	36.0516	146911	1052.46	73765.9
109.621	37045.7	1063.26	32490.9	1094.92	36035.2
242.694	34872.6	131.456	48838.8	393.887	44583.6
611.743	69709.7	0.427662	9615.89	696.575	15307.7
647.949	93274.5	18.8155	48463.1	1477.82	66854.6
356.252	39448.6	106.256	69870.4	1327.45	30907.2
67.156	20944.6	182.258	49258.8	26.2862	27335
29.8984	38239.8	582.634	29445.5	286.894	30919.5
430.356	62675.5	435.414	22947.2	-72.9051	33916.6
51.8886	55901.5	131.665	37082.2	843.137	9406.3
57.8895	52654.5	239.947	28868	2084.47	97548.4
-12.8104	122123	-8.38375	27122.8	-87.9288	113055
386.044	35832.4	258.809	21753	279.731	31439.6
114.877	42743.4	49.8465	30741.7	124.885	64501
138.717	76854.1	2.06917	20314.2	1661.66	45882
176.432	29634.9	1207.93	29165.4	577.054	26921.8
285.667	36147.6	69.159	18654.9	501.967	19489.3
536.725	42183.9	57.5848	42554.6	1561.59	41587.9
80.3279	27367.9	-1.94503	56645.4	825.095	31216.2
93.4791	124629	285.94	19673.8	441.466	108814
71.0889	38208.8	54.7703	28572.3	377.048	32513.3
18.8155	156561	31.0812	21932.5	3829.29	25001.2
190.57	57019	193.616	44418.7	1555.96	50765.8
244.067	75616.8	2.42646	12421.2	381.211	21915
51.1317	42473	124.186	42859.1	1937.72	151286
59.5676	68085.4	104.011	24967.5	1321.55	107539
206.68	253786	141.578	43108.7	-8.78617	100495
132.573	32983.1	72.9452	18834.7	1583.12	64923.1
63.6226	41630.3	32.1915	29620.5	586.459	56327.3
139.974	111914	67.9259	33636.1	1891.71	73373.9
80.562	197054	130.967	33062.4	859.234	39775.7
317.839	91465.2	482.331	26259.3	2758.99	66545.3
83.4932	28009.1	1080.9	20387.1	655.315	98387.2
59.5676	22609	170.949	19394.3	642.049	54063.3
83.2183	90684	407.74	16816.6	1427.58	182112
133.9	97348.6	3292.06	28435.9	653.203	37067.8
38.2117	115679	-95.1723	42788.5	470.902	19981.4
130.058	36574.7	83.8451	26934.2	-9.59101	72481.5
54.2387	93209.5	191.955	35210.9	1336.03	44107.5
109.131	38150.7	122.087	43104.1	804.37	21307.4
539.34	26514.8	14.9596	23735.3	2273.87	54768.3
19.1801	44905	146.389	31511.1	300.856	30410.7
103.52	49247.4	56.8994	20250.4	225.918	56760
161.985	51182.6	-5.76802	26580.4	501.506	80074.1
365.75	22834.7	268.048	27611.4	784.182	25873.9
319.942	54356.7	66.3099	45758.4	-134.073	96633.2
412.751	96422.5	127.123	22732.2	946.156	44296.5
54.6943	72788.4	630.744	13042.2	207.233	108732
87.7145	39659	73.1001	31393.4	241.183	72262.9
332.949	84627.7	114.106	32812.6	143.81	56469.6
170.185	74403.3	9.46167	30504.6	700.322	85050.9
149.107	30399.7	337.481	33297.5	-12.7433	45254.2
188.632	79823.9	135.018	25298.2	423.16	26679.6
651.922	35212.3	276.181	53960.6	69.0048	123806
62.1669	56617.4	307.451	29654.8	270.168	65957.3
592.289	16996	120.408	69885.2	918.188	68395.5
453.682	26419.9	92.9872	40041.2	22.3229	210857
-38.4982	38693.3	357.667	11686.7	294.866	49071.9
244.547	65451.5	103.66	59590	482.793	84107
177.82	37170.5	379.466	15688	776.603	24255.8
122.227	31777.7	48.7894	28720.1	229.497	80394.9
116.698	19159.9	427.958	2284.2	666.187	35855.5
-13.0786	46025.9	-22.2002	62362.4	1190.76	10528.3
166.85	31059.2	-26.2914	35329.7	558.977	55313.9
108.36	55662.3	267.569	44264.7	968.155	89290.2
309.625	32551.2	80.8741	71599	194.861	22066.5
64.9269	60900	209.925	55056.4	2614.66	44498.4
-94.7028	53189.6	313.903	13953	489.455	47435.2
52.646	54325.8	137.461	28825.9	180.039	36582.2
372.746	90647.1	117.958	89696.8	553.438	45529.7
222.543	83107.8	241.458	23417.6	732.538	26506.6
316.279	73703.8	87.2221	56141.6	668.933	39414.5
271.125	40140.8	492.092	104286	347.616	42985.6
655.699	63029.3	175.044	98520.4	269.484	101997
79.9735	39098.7	179.068	64431.5	2547.99	158902
68.4652	46429.1	40.1529	26945.2	908.195	96531.2
-16.7675	77579.6	190.57	23208	482.463	55022.3
30.7114	40610.1	111.374	62506	528.743	73616.1
115.227	57298.9	206.957	18175.4	949.107	70233.2
174.142	70403.8	127.542	390820	1777.35	18487
75.1154	23287.2	4488.66	18565.8	437.277	27226.8
158.368	47158.7	236.717	46063.2	470.571	33776.1
353.015	69186	159.898	25976.9	100.924	22318.5
-10.6641	80998.9	537.052	45580.5	467.065	24915.2
691.617	43718.4	41.5741	132067	146.32	146762
472.753	24533.6	172.129	29301.5	660.37	35512.8
740.924	274309	1016.18	25129.9	1783.12	32854.3
369.316	70520.6	-23.2733	21294.9	963.528	56095.7
4.1437	27015.3	130.757	49013.1	359.959	25173.2
26.7277	71340.9	52.4945	26586.9	1604.85	35365.2
135.786	49187.7	166.572	43488.2	108.149	75753.8
83.6878	23481.8	6.58276	51176.7	1424.9	106278
457.594	34959.8	144.716	61267.9	1601.63	30174.2
-12.3409	31651.4	896.927	39328.7	226.813	36325.6
49.4688	117034	61.7842	68265.7	678.821	53585.4
16.2672	47295.2	226.813	138340	740.987	126067
-21.4624	108871	143.531	94724.6	817.583	100302
79.6261	54648.2	-5.03025	37127	971.442	68447.5
111.304	45106.3	132.992	27030.6	719.207	42718.3
20.5674	76060	-17.9077	24243.5	289.348	24588.4
307.247	41134.9	185.93	508.278	1632.35	18253
262.301	72679.8	296.5	24168	455.738	35157.1
356.926	155319	-15.6273	25925.9	-28.5718	77149.4
102.889	20946.4	114.667	41701.7	31.7472	15422.3
212.616	21957.8	370.931	61570.7	504.137	23241.4
22.6891	70134	217.237	29047.3	1818.13	18621.2
80.4839	63606.5	634.472	23455.5	233.349	24125
480.153	44230.7	77.3682	116.277	707.617	37820.6
143.252	12518	97.2726	42553.8	2192.12	169847
36.2748	22272.5	304.8	52446.8	94.5331	65182.5
853.399	20473.4	204.056	27797.7	523.043	43121.4
134.738	43565.4	62.7029	33021	178.097	17579.7
486.554	26393.5	77.2904	871.91	21.5178	77885.7
54.6943	37294.4	37.2427	37831.2	224.885	34376.6
79.4702	83933.9	521.929	81088.6	481.473	43453.8
275.771	61741.7	104.432	41981	369.989	49489.3
312.817	19807.3	251.682	3733.59	267.706	78137.1
378.996	10443.7	86.8704	1027.78	1034.96	43379.6
224.816	122476	140.043	40078.8	259.699	81279.3
53.1766	66108.3	60.7899	37011.8	808.261	55603.4
172.407	57442.6	134.459	12950.6	763.19	12765.9
27.3903	51655.6	276.659	31082.6	758.226	44728.4
64.3896	102325	526.712	26063.7	2121.56	148598
182.535	49221.4	272.423	47737.8	360.026	19920
486.224	80083.2	21.8837	71650.1	310.644	20469.4
87.7145	68406.6	111.514	17213.4	1148.37	64302.8
74.2622	106336	85.1821	24143.2	203.089	49909.5
202.259	37813	173.656	99383.8	803.096	26675.5
57.3562	39986.1	110.392	62928.1	659.858	61845.8
421.026	40190.9	-20.8588	56154.1	33.5258	30861.2
496.044	36104.5	164.209	29618.2	585.357	67188.8
142.973	80461.1	289.008	54255.9	199.011	132260
71.5526	260011	80.2499	50266.6	50.0732	44545.6
348.292	27669.6	156.698	37057.5	1387.41	39003.6
98.1855	32901	193.893	12149.5	2899.17	68680.5
116.627	69314.3	179.97	23705.4	1749.66	39667.8
142.345	55721.6	153.913	29650.1	551.287	101582
394.423	39651.7	159.133	61733.8	2913.12	19932.3
-31.9253	39746.1	116.277	59496	140.043	63874.6
197.974	38026.5	548.743	24929.7	109.902	71305.4
232.455	31116.9	239.466	11226	142.973	63048.3
164.209	23713.2	117.818	31212.7	318.992	59839.7
342.889	60321.7	1287.95	34956.7	1176.88	27068.4
-8.24961	29317.3	38.5101	36894.1	171.435	23238.5
133.481	30914.6	-49.1623	34071.6	1282.45	28836.5
595.331	28737.2	1225.3	20271.7	380.809	16785
26.6541	12333.9	192.716	35017.6	496.307	19051.7
27.1694	25306.4	99.2387	61126.4	175.599	72811.6
121.877	88533.4	613.678	96103.1	-27.2304	16191.6
264.08	52557.8	137.182	27206.4	495.649	45452
100.011	27416	100.994	41045.8	1520.68	251935
208.199	128116	110.042	24512.6	810.742	25825.8
932.877	171747	325.636	34638.8	260.11	81806.9
134.459	54233.8	85.7449	28622.1	1400.29	67523.6
65.3108	46208.1	456.269	294505	48524.1	159336
-43.3272	55346.9	413.084	31171.6	1180.9	76509.8
106.747	63730.7	-31.7912	59791.6	270.305	59587.7
144.298	47377	92.2844	15201.3	96.6405	49762.3
-0.60363	45202	25.1834	206700	307.587	32695.7
169.699	67775.2	420.96	138.02	2589.64	49078.2
65.1572	75655.2	124.815	28049.9	321.773	36057.6
123.836	19902.1	959.57	19508.9	883.312	14021.6
66.7713	153499	172.823	1316.25	619.738	39403.9
53.4041	207864	79.3923	48773.3	429.623	65134.8
183.436	19700.2	100.853	31432.7	7.15773	16172.8
134.948	95372.6	164.279	40942.8	-207.045	46354.9
497.426	55228.2	255.795	43839	85.9559	110259
148.341	22590.3	89.4725	126403	554.416	39204.7
67.31	82054.6	13.2919	34897	381.48	66434.9
-12.2738	104774	175.322	104677	131.735	75611.5
283.826	63968.4	407.138	42944.6	710.406	17646.5
106.116	88159.4	511.431	26837.1	277.342	22704.6
499.796	37880.7	113.125	179654	329.835	55376.9
-12.1397	126166	-16.4992	70501.3	450.033	37036.8
761.848	31230.6	43.1475	19986.5	1124.43	52879.1
41.125	92558.6	-19.1149	51320.9	696.956	23453.9
117.958	32381.3	316.414	84044.6	1202.83	35039.8
314.921	28480.4	188.632	73874.6	724.644	93475.7
458.92	87662.2	355.51	90261	1673.06	24292.5
134.459	50226.4	285.735	45040.9	343.024	108798
448.706	83031.6	482.265	60432.3	228.602	164203
60.5606	38328	445.519	9726.69	119.358	30187.2
68.08	40868.5	353.217	36598.6	1170.37	89944.5
-6.0363	89085.7	17.0672	19019	99.2387	111915
45.2497	21249.7	223.714	25321.2	221.028	70244.4
819.193	50664.9	113.686	56823.5	506.109	68450
-10.9995	56538.1	447.112	32487	700.766	48031.7
100.011	22991.3	308.334	231126	896.592	106833
59.1097	11522	169.49	14592.1	1489.76	21974.8
455.009	35189.1	-26.3585	47676.9	642.305	15522.4
237.336	73417.4	8.88507	31333.2	198.734	25732.5
26.9485	24491.6	241.389	32966.1	228.464	23307.4
200.739	57450.6	19.2531	38776.1	929.858	49739.2
216.341	325611	483.255	95412.9	539.993	274678
13.7266	53355.2	87.6441	20380.2	6603.24	35793.6
24.8161	57329.4	143.461	31165.3	198.319	58652.9
642.755	44016.2	136.693	66915.4	54.0869	64682.8
223.163	146068	439.605	45714.9	295.547	84128.1
155.375	100360	45.0994	40771.7	268.322	29643.8
80.4059	95858.9	612.195	121548	264.902	53458.7
342.889	46310.7	171.018	42990.7	539.405	33974
63.0094	40518.4	533.128	49817.1	2808.35	67716.8
119.008	43221.2	5.00371	24762.2	1139.59	20061.1
131.735	49251.7	-2.74987	65342.7	566.722	28961.7
33.3774	171106	88.699	53666	92.8467	54452.3
82.7894	47078.7	234.793	22430	749.36	40944.7
109.411	32491.3	88.2068	24446.1	312.07	64294.8
-3.21936	25693.6	110.953	72781.4	1518.6	44755.1
71.8619	89853	-62.3751	43166.7	466.536	24482.5
164.626	61630.3	68.0029	74959.5	161.428	44485
524.813	53460.8	214.617	19723.5	956.15	58226.3
48.3368	18286.3	55.9863	27307.5	1167.96	41794.1
172.476	31944.2	122.857	29217.1	285.94	134452
198.112	19973.4	296.569	55402.5	134.11	57584.2
757.086	157000	-0.80484	27126.2	185.792	127644
94.9546	60729.7	260.795	26896.1	501.572	18095.1
118.308	79504.7	70.5481	35708.2	1784.46	50145.3
180.524	37769.7	52.7218	203073	31.7472	29842.2
46.7543	26049.2	123.556	20502.9	259.083	26384
158.855	17822	164.348	18979.3	1005.45	46125.4
33.8225	23194.8	418.358	20461	807.187	140064
535.286	20420.5	251.614	37279.6	244.479	22796.9
41.1998	59550.1	4537.89	19268.5	-156.608	27019.4
44.2731	72934.4	162.193	76074.7	920.402	76878.7
49.771	20456.3	160.663	65297.5	309.285	62159.8
147.017	63987.7	90.1053	28918.3	3607.02	67694.8
141.299	29958.7	133.831	140400	293.709	49771.6
475.067	21448.2	9.31748	51470.9	61.8607	27022.1
206.957	54352.2	54.7703	42193.1	284.712	13410.4
524.158	73292.3	329.632	16518.8	214.962	48285.3
212.892	54676.6	133.761	19962.4	195.968	92028.8
170.532	51816.7	52.4187	44925.5	966.345	73594.8
176.363	43554.5	80.4664	33182.8	1190.56	82035.9
201.637	42049.6	508.475	23640.7	688.182	278882
35.9772	63388.5	160.176	17974.2	540.973	53692.2
772.781	12918.1	-32.1936	29709.2	227.088	34928.3
318.585	58229.9	85.5338	13108.9	923.487	71850.5
204.608	143870	690.981	33022.6	1098.14	27900.1
58.1182	65945.3	-38.0287	30365.9	727.93	66951
149.943	50998.1	125.514	45089.4	53.7075	45942.2
141.718	57832.8	139.206	30508.2	277.274	37390.5
200.117	50614.7	55.9102	111251	1466.15	83014
246.195	100368	166.711	38474.6	1326.44	38199.3
278.639	17508.3	-4.76197	59809.6	168.657	73183.3
17.7224	27890.3	11.8444	26966.8	134.18	20889.9
80.562	64489.3	134.18	6634.23	627.528	53422.2
140.671	54145.5	713.067	26419.7	1826.18	41145.3
190.363	23077.9	146.599	28767.4	521.011	24261.4
226.262	40523.2	38.4355	44009.5	140.462	44967.6
742.436	17628.2	59.2623	37759.4	1154.21	57079.2
155.445	37942.9	693.715	73692.3	124.186	25907.1
127.752	95287.3	60.2549	77400.3	152.381	129349
534.698	52270.4	329.429	30401.3	344.375	156630
163.653	26594.7	320.417	22461.8	398.843	24255.2
199.08	52678.9	104.993	28781.1	677.801	28089.1
143.88	56552.8	464.285	46980	294.39	24096.9
130.687	79460.6	199.149	41690.1	79.3398	165078
297.522	47618.6	241.458	23751.8	291.733	85713.1
719.523	28225.5	536.921	20244.1	255.795	105415
119.638	48030.8	135.367	80601.2	2357.44	62425.2
36.126	44488.4	83.0006	17832.8	567.697	145877
-10.4629	40789.3	183.505	21281.8	565.096	20830
216.823	53690.3	135.856	28499.3	663.631	53207.5
947.632	18735.6	180.594	44260.6	890.086	48113.2
53.3283	70604.1	219.512	35954.7	1095.32	28899
267.706	25906.4	40.9754	27567.4	1931.48	63331
91.0192	36850.4	40.9006	21291.2	1961.66	87378.7
54.1628	79868.6	115.577	42668.2	236.992	65089.5
167.198	186573	43.8977	39115.2	977.143	53605.8
959.839	146957	488.269	86136.5	259.083	18326.9
71.4753	57808.6	160.941	24636.9	1967.16	70418.4
127.542	42873.1	70.3165	34210.2	2243.56	31021.3
90.738	50974.4	92.0033	35403	743.57	45333.3
-14.0847	30357.4	122.927	23207.8	1801.1	88915.9
175.808	18364.7	124.395	25632.3	1218.26	103446
-77.7341	34780.6	-28.4377	18461.2	506.438	50369.4
68.234	64248.7	70.0077	35533.1	186.623	78229.8
381.95	60512.6	219.029	20105.7	1907.27	113775
11.1939	111463	164.835	54342.9	1261.39	21230.6
308.538	41348.1	95.3761	22695	-7.44477	34293
66.3099	62738	226.813	82176.3	-43.3943	61286.9
-22.066	40815.3	37.0937	35969.1	383.762	112586
102.046	28828.9	79.4806	26274.3	198.942	25079.8
129.639	69629.1	186.277	44052	672.316	68408
116.207	215660	80.718	59875	1759.25	56096
105.695	42507.3	165.391	104817	137.88	88664.6
82.28	53661.5	98.3962	13372.1	692.571	30702.2
22.9089	84275.4	-15.4932	30366.4	149.874	30594
70.0077	47955.6	167.267	55888.5	251.408	68299.2
119.078	58607.2	67.233	45343	-111.068	26951.3
638.133	57866	401.855	24261.6	940.992	25970.4
80.4664	49940.7	285.462	96310.2	524.289	27701.8
27.464	9937.22	105.274	39855.8	121.387	338905
170.671	18349.1	125.375	33596.1	937.236	72918.4
86.3077	32024.8	47.5829	32887.5	80.9592	13664.8
82.5145	40102.2	102.959	26888.8	491.564	39488.6
811.748	52145.3	1413.97	168694	514.058	22655.2
170.254	78956.8	107.729	37378.2	166.016	33825.1
104.853	19618.1	509.789	12823.9	250.379	85671.7
57.4324	42899.8	29.0862	71191.6	2489.64	48093.9
118.798	34838.7	164.07	38972.4	-90.8798	58603.5
66.233	90445.9	166.503	91533.9	1274.06	44398.8
-1.67675	19992.9	115.437	86403.3	705.461	44345.9
157.602	45523.8	152.451	29406.8	571.988	29672.9
-7.71305	62026	339.104	25903.6	799.944	10923.4
71.63	47899.2	118.658	33444.4	1015.04	87345.8
59.0333	39716.1	29.3814	101616	810.34	13763.3
172.546	74018.2	165.53	32509.8	412.083	35802.4
72.6356	94767.3	244.547	46418.2	1114.84	70090.1
502.098	44994.5	122.017	32458.1	533.062	18938.8
271.808	104095	190.57	23991.5	40.3771	51242.4
109.201	15682	279.936	21777.6	594.555	158605
53.7834	61828.3	3673.42	1932.15	275.839	42078.3
114.877	63725.4	95.3059	62474	748.102	40956
277.752	69270.2	-30.4498	16544.8	2371.13	39076.3
103.169	36652.9	274.2	41047.9	742.436	74359.6
-1.3414	34363.1	11.9891	27771.4	618.385	11090.8
130.198	52535.8	261.48	24905	302.76	32045.4
-11.9385	99466.2	97.2024	38065.3	223.576	49857.4
123.626	17131.4	71.5526	34214.3	500.98	45111.4
106.747	129844	341.74	55848.9	869.63	58193.4
168.587	73483.3	63.7759	33039.2	203.296	62881.8
-16.298	80262.4	206.819	31638.9	1081.57	35484.8
153.217	62677.5	271.398	4579.2	1282.65	42278.9
308.674	66978.5	157.811	63291.9	298.815	36666.5
93.6899	37687.9	143.81	27142.4	2799.23	33925.9
42.4728	68021.6	229.703	90857.3	-18.8467	12677.7
334.438	130336	109.411	41281	-10.3958	22656.9
134.808	96388.7	1705.25	88735.3	298.202	36578.4
74.4948	60393	431.155	28817.8	1715.99	11443.1
403.126	27670.5	385.708	31913.7	150.083	58420
270.305	122509	274.132	34482.5	372.813	40331.5
445.784	22235.6	-28.9072	74686	294.662	25520.2
36.9448	22225.9	414.553	51191.3	241.183	37822.5
231.217	31585.9	455.804	31263.1	603.802	46800.1
130.687	49016.8	87.5738	71537.6	4297.17	31072.2
274.61	22379.5	113.966	73686.8	828.918	75329.1
79.5482	66844.8	181.079	54106.9	475.86	111503
10.8327	85548.4	221.234	34518.4	204.816	69345.2
29.2338	44812.4	211.098	28338.8	848.368	31726
38.8085	41540.5	150.292	20506.1	3110.71	172458
81.5768	49501.7	136.205	22788.5	1287.41	109931
117.188	127013	-0.20121	74172.9	268.527	40203
325.839	25603.4	146.041	44287.9	1042.8	81179.1
66.6175	35840.1	500.191	56713.3	33.0808	39961.7
1096.73	32018.4	140.95	32081.6	163.584	209801
-5.70095	31554.3	137.252	26792.1	250.242	11746
1072.05	57573.6	139.764	90332.4	1040.12	74721.2
44.7237	40467.2	147.783	25472.9	704.193	33290.2
24.2288	113372	83.3525	27429.2	1588.42	55198.4
-41.6505	37922.6	265.996	40628.8	2371.59	25155.5
84.0562	77144	184.683	43741.5	591.447	71340.5
242.694	84900.5	92.9872	69683.6	767.08	88702.5
473.877	41107.1	126.353	79669.1	745.773	215233
86.378	27329.2	91.5816	35416.8	131.665	84011.4
244.891	54970	5.57755	26657.9	467.661	31097.1
-40.8456	56753	226.193	40180.1	98.0451	49827.6
73.4873	46139.2	312.342	29782.1	83.2117	46826.8
339.78	15666.7	272.15	53994.9	517.667	50225.1
268.664	91512.3	100.573	16957	1527.65	19684.2
2.56942	126406	100.994	37054.7	-62.3751	20876.4
39.7045	72612.1	89.0506	52656.9	641.792	40250.7
136.484	106213	60.4842	286237	857.289	65800.3
2.71241	55986.5	18.5967	33790	217.099	42343.7
160.733	40104.9	569.778	75483.2	1587.61	57361.3
113.896	26467.8	94.252	138708	502.69	46069.7
130.477	109.131	122.227	9804.02	131.456	100474
39.7792	5773.99	2.92694	32533	944.547	126082
158.785	47274.4	22.4694	17218.7	670.082	49932.2
74.3398	39449.9	430.09	28709.4	880.361	13373.8
84.8303	55947.2	369.72	16108.2	1584.33	135633
0.142528	48961.8	5.07541	30044.6	267.775	49016.5
162.332	60930.7	131.875	24966.8	1111.69	34824
83.0619	66336.1	151.337	14348.4	2461.67	35941.6
984.319	29162.1	421.76	39328.3	249.076	39367.4
150.152	53061.2	104.643	18938.7	663.119	14777.5
143.461	47811.8	110.252	62630.4	250.037	45433.3
464.815	33960.8	71.8619	26944.1	876.94	48686.3
187.247	20197.3	242.556	27552.7	1448.78	41593.7
115.577	312732	1965.49	46826.9	672.954	153275
-12.8104	18186.9	228.327	31429.3	671.806	42048.9
256.549	94175.7	851.923	63495	601.023	164847
121.807	66156.4	274.268	44151.4	878.214	116202
37.5408	37736.6	300.312	1154.68	1073.19	26687.6
74.1847	53747	443.393	31523	-50.5037	263704
451.095	68543.8	38.7339	14420	663.758	13881.1
146.808	22443.4	69.159	31614.5	724.391	49545.9
80.1847	96234.5	129.709	26319.8	7.22963	14268.4
-14.8895	164408	261	21454.2	155.654	25084.3
152.869	36610	155.236	28282	364.875	107014
117.258	55209.5	77.6793	28285	501.704	50471.1
226.124	75244.3	250.722	50976.8	579.909	95120.1
272.492	25164.7	96.6405	25084.1	804.303	58193
-8.58496	63961.9	286.894	41543.1	671.678	39911.4
38.5101	41528.6	520.356	48807.4	702.797	28430
81.9674	105255	184.06	18714.3	305.14	92447.6
89.6131	102946	81.3816	25885.4	1849.39	40551.5
184.683	140113	57.2801	45935.7	-78.4719	43309.6
462.961	34447.4	341.605	38010.8	777.945	22763.6
188.839	25095.1	133.691	72257.7	245.577	122973
153.147	48606	199.564	31769.6	863.325	113019
123.346	86111.6	366.625	83336	91.7221	77511.7
19.2531	19211.2	33.3774	41108.3	108.43	58192
82.5145	34404.6	19.2531	48904.7	404.53	60375.6
105.414	73230.6	104.502	29423.7	498.414	120113
2884.95	37262.8	479.691	19128.4	81.733	19119.8
147.365	59398.5	97.0619	36568.4	394.825	27509.9
83.071	49291.6	104.783	39925.7	355.038	58758.7
251.614	31399.5	30.1201	17453.1	764.464	79084.9
220.752	17331.2	86.378	24339.4	162.054	63329.7
361.508	52041.1	354.701	39603.9	411.415	34994.9
40.2276	20429.2	29.16	34451.3	1357.63	27526.1
107.027	51994.9	179.762	21761.2	1232.14	26146.5
336.602	95554.4	81.1704	71589.3	1896.74	29347.5
159.759	53173.9	88.699	29638.5	153.983	45924.6
2045.9	55941.3	215.375	20344.5	470.505	60847.4
80.6072	40419.7	148.341	25867.7	380.876	28082.4
-20.4563	47145.6	53.025	37774.7	1423.02	28934.6
270.031	29565.8	356.589	19925	426.959	79165.2
27.9798	59818.9	494.068	31261.4	374.83	24272.8
472.29	36937.1	44.198	26425.1	634.151	34447
27.243	81273.5	25.992	277204	977.948	51068.3
263.328	35583	785.993	68584.8	689.773	70403.6
37.4662	37493.2	35.3079	22977	1766.76	87203.9
99.3792	60895.1	71.7073	24444	684.554	33625.7
271.398	26463	18.0866	37924.5	705.905	289938
396.633	20152.1	2797.36	22389.1	474.075	25159.3
291.938	83240.9	205.023	27749.3	215.306	31810.6
34.5649	17694.6	177.75	25895.3	781.097	53100.1
104.783	80127.5	119.008	66079.1	219.098	27668.1
165.322	74752.2	18.5967	15938.4	556.045	64201.6
1514.57	45595.7	101.696	36439.8	456.136	23101
82.4375	47461	274.2	21366.4	971.71	65017.1
166.989	83008.8	-1.40847	8699.45	299.087	69428
387.452	26820.1	78.4576	30364.7	798.468	100200
1192.04	46893.2	120.128	24583.3	1392.57	93363.7
-10.4629	118232	228.74	29962.5	1043.01	38003.2
183.505	59678.6	-21.3283	37132.2	1212.49	66915.1
110.182	22486.9	128.311	30479.5	432.42	58369.1
421.56	39833.5	202.743	242794	5867.55	126526
-4.09127	40005.7	151.685	26856.7	1098.61	72927.9
628.171	57657.3	-69.4845	15667.1	167.545	22299
125.095	37821.4	129.709	141045	57.9657	59688.8
36.7959	38204.3	153.426	18895.4	2375.42	86.7298
130.268	79195.4	80.8184	237601	1781.65	20457.4
110.533	27472.5	166.572	34336.6	826.571	17050.1
211.374	16045.6	38.4355	54872.4	-133	63745.3
237.267	78603	77.6015	20944.5	474.868	40189
480.813	154201	80.4839	39321.2	279.595	28724.8
70.3165	72389.6	139.555	19577.3	2735.79	50026
312.613	45291.8	125.934	56420.1	-80.7523	17097.6
255.384	64252	115.017	27756.3	1429.19	232259
31.5992	24697.8	91.0192	49135.9	599.212	53932.2
25.3304	123153	423.293	21403.4	389.598	50147.2
161.22	153860	327.126	21148.4	1605.39	190831
92.5655	25222.5	143.949	70897.6	54.5424	123568
319.264	47151.3	74.0297	23458.6	210.615	149617
53.9352	51757.3	42.9226	20740.9	1515.78	50759.3
257.165	22271.6	269.347	71092.4	379.936	31376.2
144.019	29675.5	506.372	41097.2	22.5426	35042.1
106.887	80234	86.5891	21473.5	383.091	43667.8
-27.1633	67418.1	153.217	260126	123.206	54332.3
122.507	34593.9	190.57	37778.5	761.848	67626.7
864.868	65781.7	81.0296	33580.7	2183.93	194794
103.52	38173.9	47.2815	187425	1622.02	23173.5
209.649	39674.2	262.096	38739.9	1285.53	28155.8
42.0233	100216	217.099	25920.4	613.098	24609.1
190.847	89202.8	211.995	59923.2	494.068	132436
155.027	23178.5	425.96	100152	14.4517	58854.6
17.9409	80857.3	327.533	38275.6	288.19	50924.4
122.577	48828.5	160.176	31389.2	2512.17	54587.3
376.913	32532.8	278.776	20871.2	737.08	3699.85
184.753	29616.1	279.322	85107.2	946.156	31844.8
100.783	60521.1	47.5829	45753.3	3700.65	387981
154.401	27701.3	123.836	41492.1	546.72	81542.6
-61.302	56443.8	34.7878	101314	1554.48	35138.1
99.309	45666.3	108.5	34022.6	1516.18	73879
99.2387	34519.4	298.883	19688.5	568.803	16515.7
357.87	55826.2	21.2253	47126.1	-4.15834	112250
169.143	181472	204.678	9369.54	914.634	32399.4
192.855	31038.5	46.2274	37636.9	447.444	86087
293.641	34163.8	164.904	68988.3	1257.03	560.865
24.8161	60218	347.346	42456.9	703.051	31500.8
222.474	22629.3	385.037	28550.2	684.873	22530.5
83.4229	32372.2	83.7044	42807.7	852.191	52707.6
80.0939	28930.6	337.481	68739.7	513.204	104209
167.893	18525.6	347.684	31023.9	1360.78	90050.8
74.2622	84668.7	59.4149	17707.6	1414.98	74059.4
-28.9072	235934	-32.596	69760.4	1199.55	32529.5
-3.68885	83729.3	186.277	37202.1	427.292	74162.6
200.946	127749	248.596	26461.9	1469.97	52595.1
160.037	39852.1	138.578	83956	879.623	26571.8
471.762	32943.1	94.252	8130.69	132.783	109000
3.35618	71227.2	74.2622	35046.7	388.927	70909.8
35.7541	43224	138.508	31472.1	1287.81	66866.7
167.267	37645.5	408.341	38635.6	1931.35	49733.9
274.542	54298.3	55.5301	11901.8	281.028	40653.8
76.3577	29583.6	1741.47	29886.8	793.17	74701.3
24.0821	50719	166.433	58928.4	644.294	53533.8
237.13	14586.1	-4.35955	74943.9	2589.44	71578
494.002	34852.4	8.38088	25369.5	63.6992	31323.3
201.499	66141.2	82.3581	32864.3	458.92	290441
150.849	52751.2	23.3486	35765.5	262.712	33214.5
-17.5723	63467.4	148.062	21175.5	757.287	55977.2
-26.2244	91116.5	272.833	23460.9	201.361	39100.9
174.42	42018.6	49.0913	34512.6	969.899	35385
76.3577	75537.6	53.025	19924.3	1303.04	56183.3
132.364	55934	34.4907	13241.4	580.883	37626.2
118.728	64683.2	130.268	181486	2324.24	163501
106.887	82243.5	115.437	1843.02	122.787	30371.6
229.772	35819.1	427.958	83869.4	1419.8	53007.5
297.794	50935.6	415.288	23841.6	2771.8	80527.9
-12.9445	63661	260.726	383350	507.818	206382
108.36	117392	39.4058	55298.7	384.098	16161.9
88.8397	55366.5	172.546	42769.8	2163.01	102152
234.861	65441.5	172.268	28430.6	110.392	15246.3
246.606	84439.9	39.1817	25399.5	563.469	19302.5
69.3904	35707	68.157	77309	1028.85	211183
107.729	43330.6	35.0107	129203	1675.61	63396
422.893	70266.7	677.929	39147.8	399.847	16876.9
90.035	26379.3	340.659	77518	672.763	28245.1
139.485	37454.7	462.63	27121.8	2651.48	14819.9
650.256	31633.7	80.6776	41226.3	1302.16	285589
62.7795	245208	104.292	26759.9	999.88	94697.5
100.011	186476	223.99	43725.5	514.583	96046.8
146.599	30927.5	150.501	212678	172.546	16945
35.085	44979.1	931.938	16595.7	918.389	66916.8
164.626	76211.2	129.289	8635.06	205.23	12329.1
269.552	26329.5	173.587	30684.3	671.231	67342.4
208.269	91305.5	-50.5037	39402.4	526.647	62736.7
129.15	93924.3	9.82225	42406.9	840.722	959.436
256.206	18252.5	78.8469	17554.6	186.554	97716.7
9.02918	78516.5	-16.0297	31106	306.296	18260.5
183.297	52382.7	242.076	28198.7	323.806	34112
44.5735	61424.9	921.542	23979.6	1811.36	35963.2
8.09292	156371	19.399	22206.3	831.936	88394.4
149.316	102231	203.02	17412.6	234.38	17131.3
85.7449	45526.9	67.0791	6614.58	278.093	37515
261.069	81122.6	167.545	25059.8	115.577	37169.2
255.384	122767	14.0891	66231.9	783.78	154042
1080.3	73496.9	162.958	54721.6	17.3584	32800.5
66.0792	61407.1	126.843	33403.3	874.593	28691.1
707.237	86981.2	233.349	41285.4	653.651	134809
14.0166	23473.6	653.459	35179.2	1640.73	31778.1
93.0575	51509.6	76.6685	43842.4	-24.6147	20175.3
219.443	64625.5	9406.9	30528.4	1038.65	60951.9
-23.0721	59918.7	-26.3585	65870.2	766.342	73185.5
251.545	21842.4	38.1371	36109.3	296.909	95123
655.891	23566.2	-2.21331	51659.6	152.312	98416.7
492.092	67799.9	266.954	26648	1012.89	91894.2
907.323	119071	279.936	63361.8	1448.44	53961.9
15.8311	22948.6	289.962	31704.2	1144.62	105133
24.7427	33756.2	87.9255	20374.3	1602.24	34237.5
-33.4009	36479.6	125.095	31463.8	346.064	85901.9
281.915	86503.8	-15.6273	51631.5	343.429	102539
223.439	20418.7	-10.53	85525	1093.71	54582.4
1004.98	75981.1	86.2373	107467	1374.4	65253.1
54.6943	84021.8	323.196	46775	864.599	14234.7
163.514	155761	153.913	73593.2	636.528	86526.9
141.578	68527	213.858	37128.7	429.29	52841.7
253.328	48833.6	16.849	22987.6	146.32	40539.5
91.0192	30220	114.246	72282.1	1065.68	20470.7
10.8327	8394.62	118.728	25221.3	1559.44	17520.2
163.445	27160.5	674.677	51666.5	506.175	55239.6
223.163	15110.6	269.552	29192	54.8462	99688.8
675.506	33347.7	253.053	32494.6	955.546	39585.4
207.164	24307.4	15.1048	235476	515.567	39952.7
42.7726	25932	605.417	32191.6	53.7075	40258.2
-20.0539	118950	8.95712	22420.6	286.076	115653
115.787	48438.6	96.7107	53413.8	82.28	21445.4
81.2408	28929.4	35.9772	19064.9	2323.04	25611.5
84.9006	89086.9	-20.7917	35546.5	82.9054	46722.5
267.569	57970.3	469.976	42186	1104.51	35216.2
74.3398	32175.8	351.328	36506.1	131.525	24561.4
150.292	57520.6	107.097	21672.2	1693.05	54569.3
39.1817	25824.5	59.873	30131.4	300.448	95043.2
562.558	20990.4	207.164	21810.5	677.164	73101.6
34.8621	30219.5	238.641	44449.7	358.948	38217.5
209.58	45482.9	594.166	25561	750.995	16495.7
236.099	34895.1	120.478	54837.9	816.711	30275.8
79.3398	41525.2	387.72	118962	354.768	51743.1
65.3877	56092.5	104.923	29260.8	917.048	16961.5
60.2549	60359.1	49.8465	32163.8	65.0037	288513
370.124	43627.5	734.62	20196.1	885.257	68843.4
65.9255	29279.8	33.8968	37383.1	400.851	148198
144.298	113512	611.227	37120.3	-72.6368	50460.7
229.565	37068.6	29.2338	27482.2	169.629	104656
40.3771	43272.5	147.644	11659.1	210.339	179687
132.713	54173.4	413.819	41911.4	2215.66	10861.2
215.858	30442.6	32.0434	25459.9	2351.74	25933.1
219.029	74020.4	-25.4195	27456.1	895.317	152708
180.108	26084.3	165.461	44128.7	2824.85	43481.8
70.5481	28621.5	1561.05	68409.3	1523.43	70148.1
192.716	85295.9	271.467	83767.9	320.01	66017.5
68.08	69432.9	384.031	160973	434.55	30170.6
71.0116	40297.7	157.672	25007.9	4522.87	23226.9
213.237	87686.8	135.018	24422.3	809.669	121449
203.158	54964	127.402	34087.3	1339.12	31839.1
43.2975	83176.4	161.915	70158	233.142	64029.5
322.044	40294.3	154.261	117273	800.078	49770.6
98.0451	63699.3	498.019	36450.9	223.439	47022.8
94.252	43967.9	257.302	50632.9	653.459	33889.1
379.801	121845	356.926	31237	453.152	193527
209.442	33520.2	113.336	56293.1	321.976	171659
307.791	54074	22.7624	50853.4	1290.29	14223.4
597.337	3371.81	70.9344	16776.8	1489.02	39144.3
462.563	64221.5	27.9798	25495.3	283.621	29179.9
113.686	40172	149.595	58463.2	363.865	80350.5
91.3707	31565.5	35.7541	37443.9	343.835	63825
10.9049	38344.9	93.9007	111114	1621.69	61947.3
442.13	34530.7	179.207	26492.3	1643.48	31319.7
110.673	48241.9	22.3229	39333.9	660.882	39285.2
724.391	34341.2	11.4107	64922.8	14.2341	50529.4
25.8449	42477.9	195.899	33597.3	1673.73	68392.9
23.422	36981.7	142.066	8048	658.387	58294.1
183.505	37906.7	105.695	27831.8	168.031	63385
375.233	44860.4	215.031	14677.1	1001.29	55348.5
331.731	29497	185.099	39120.5	262.369	17896.8
155.932	98185	188.078	24654.2	322.857	70155.9
529.79	94310.2	27.7587	31611.5	821.607	234806
91.933	80069.5	86.4484	27294.8	821.071	51748.3
321.908	35122.8	37.988	322721	318.111	30898
206.749	18747.3	29.8245	39471.3	858.63	34146.5
162.749	23272.4	1152.33	26375.1	710.723	48578.8
159.202	98421.8	21.6641	67910	2551.61	38619.4
79.86	55294.7	229.084	18298.8	2075.08	127212
14.9596	61081.7	251.957	189705	1157.09	39080.1
-12.6092	114795	815.839	24065	82.0856	29596.5
504.86	28990.8	-11.0665	19551	735.314	92009.1
18.7426	12429.4	117.118	26881.5	1399.15	36259
127.053	66571	240.634	22434.4	254.63	95516.1
93.6197	27951.1	12.4231	25782.3	1002.16	1.23627e+06
-16.8346	49553.7	133.691	87927.8	191.124	72135
574.716	41615.9	61.0193	38754.4	427.825	57325.8
-8.85324	44499.6	416.823	41884.9	-55.0645	41442.1
79.8327	38136.9	394.49	36241.5	711.23	18987.3
95.1654	32264.8	221.785	30243.2	984.588	189595
216.203	45044.7	141.09	27311.7	1228.25	80017.5
260.932	35632.5	78.6912	27628.6	1388.08	81391.8
231.423	92493.7	1687.41	69624.8	528.481	64054.2
753.531	37908	94.8141	50068.3	1180.77	70736.6
692.126	24805.2	176.71	23985.1	247.43	35797.3
139.485	31382.6	138.02	52401.9	603.414	89692.3
453.152	44999.6	233.83	21758	1144.82	39442.5
57.8133	77746.5	361.306	8201.19	2777.91	55213.3
88.3474	32800.5	167.545	17043.3	195.069	55631.4
35.1593	32926.7	77.8349	33850.7	83.453	95080.3
84.6192	53590.1	715.789	38747.8	442.13	31694.4
-2.74987	77008.4	390.402	19567.5	-3.15229	53844.6
61.5546	80600.7	-21.3953	33358.9	888.275	46252.1
192.301	15333.2	257.165	24510.3	288.258	46108.1
136.274	74678.3	48.9404	24125.5	493.87	83826.3
647.628	39087.8	122.017	61707.7	1256.96	63517.5
-2.41452	33464.2	508.672	47033.6	652.178	40284.9
29.8245	86059.2	44.7237	16189.2	336.873	61781.2
-11.8043	26002.9	81.0302	24150.4	359.352	62517.6
479.559	33452.3	19.472	20330.7	1240.33	39983.8
111.233	26345.4	82.8598	36853.8	934.889	33177.3
159.968	39955.4	379.264	13843.2	191.886	29949
692.189	290158	253.67	16233	1387.07	113471
504.532	27215.1	22.5426	19117.9	693.906	28899.8
53.1008	31524.4	49.3178	79458.8	366.221	72454.1
72.1713	31209.7	562.362	23991.7	194.792	31771.4
132.014	67461.8	78.0684	26460.3	481.209	19672.4
20.4943	34521.3	465.609	21704.8	1440.93	70262.8
83.453	38236	82.0152	24948.1	194.654	25790.3
153.983	34661.8	133.761	90162.4	496.702	39070.5
43.7476	132946	48.8649	43232	2091.58	63524.5
186.969	49003.6	6.79833	32927.5	609.485	114516
145.414	78046	121.247	45599.8	47.3568	18929.6
132.014	28650.3	29.4553	14369.7	1040.26	46727.8
237.542	59318.8	922.145	341277	628.557	16808.1
93.2683	50073.4	289.144	16946.3	-27.0963	32125.6
55.4541	84384.2	37.5408	18462.2	85.5338	107701
134.11	31868.9	86.0967	72703.8	497.821	131646
122.227	25758.5	54.4665	58736.1	853.063	150567
298.134	68229.7	106.536	34798.2	236.03	74175.5
169.907	59878.1	282.87	39239.2	1742.14	33014.7
-5.70095	46333	58.4994	29860	519.634	25903.9
-6.57286	47060.3	187.316	14426.6	964.466	173861
99.5196	93904	84.6895	2321.43	226.881	25916.9
272.287	40555.6	412.216	33795.6	508.607	34888.9
110.252	51983	51.8128	49745.7	244.136	38831.5
101.485	36773.1	148.132	56307.5	471.365	345505
173.379	46079.7	51.5857	29324.2	71.5526	69075.8
126.074	74477.4	152.66	46245.4	1680.24	59116.7
40.0781	41547.9	9.89438	28882.7	1071.85	21568.7
259.494	46105.9	18.451	28606.8	629.136	19286.1
505.058	66946.1	200.048	24188.5	1327.38	67266.7
153.913	54915.7	215.858	21765.1	518.585	147154
216.548	30253.6	33.971	39456.9	34.1194	15399.8
404.798	45038.3	49.3178	140542	1042.27	37116.3
82.6487	49717.4	132.434	57020.3	3479.05	33962.2
43.3725	113141	176.918	304259	2680.45	242815
346.806	15912.4	821.943	42497.9	913.091	313866
28.4222	44340	185.584	46658.2	1101.02	12029.7
2.28352	20689.2	65.234	20902.8	498.414	75298.4
57.2039	30274.4	-12.8774	14248.4	1267.89	51085.9
67.6949	41429.9	163.792	39088.9	85.3228	53085.8
139.276	52162.2	26.9485	215932	801.688	43501.3
93.6197	9471.29	94.0413	21133.2	2644.1	39309
222.681	89487.5	235.342	44670	1573.46	23881.8
-35.6142	52088	256.343	27072.1	1385.6	45674.2
17.7224	154437	-17.0358	31832.8	346.401	54259.4
50.9804	85087	51.8886	42309.2	1111.08	68410.6
201.292	25839.8	74.3398	49152.2	2163.14	59094.2
316.143	23573.3	171.574	34736.7	327.059	23742.3
280.346	79687.7	446.448	23627.8	3817.02	11336.6
-17.7065	82284.9	219.65	30706.3	595.59	25324.5
21.8105	38176.4	76.28	34878.5	825.229	75175.8
105.414	86253.8	-26.2914	16980.4	110.533	53215.6
166.294	72601.6	70.6254	34282.5	539.666	109785
133.831	37184.3	79.3144	20329	180.871	68492.6
288.19	53767.1	260.11	62846.6	8130.23	50471.1
159.898	55164.8	214.203	145284	803.968	57990.4
120.268	33467.2	105.975	34831.5	1068.43	48679.4
87.9958	49871.3	-31.7912	13347.2	304.528	34151.1
-37.0897	194378	155.306	19782.4	663.822	36580.1
545.871	207645	273.722	42632.6	581.077	17121.6
-78.2707	63241.6	1322.15	28434.1	675.825	124130
245.714	83286.6	163.167	43159.2	386.111	24008.7
113.966	161745	215.031	29793.6	635.693	27219.4
111.934	20836.6	28.5697	26592.9	2708.96	17949.1
127.402	78790.2	3.49931	44660.8	987.404	16386.7
18.7426	54876.7	529.986	28944.7	195.691	113403
142.973	59932.1	230.529	17677.1	120.058	19379.6
924.493	76275.7	186.623	33440	918.389	49403.7
-35.0776	32418.9	58.4231	71172.9	332.272	65834
46.4532	60019.2	298.338	60110.3	718.194	35422.4
285.122	83172.7	140.601	73823	169.976	24805.3
259.22	31914.5	225.849	26266.2	682.58	53396
176.224	25267.4	94.6736	40097	440.269	38170.1
206.888	20611.8	-15.2249	27125.4	217.168	25769.5
122.787	121856	65.7718	66315.2	3106.55	49324.8
289.689	33660.8	1958.98	102834	72.7904	88695.5
163.097	77522.7	262.096	40575.6	561.972	90561.1
75.814	48356.7	108.5	26283.8	139.066	61699.7
-16.9016	42834.5	297.658	30714.8	654.739	46441.4
459.781	52725	-6.50579	11230.7	-33.9374	32357.9
289.553	69236.8	270.646	37192.8	1149.98	137481
121.107	125871	27.3903	4072.89	194.1	56289.7
240.496	19422.3	3.49931	30145.6	294.458	35062.5
373.687	37276.5	139.555	33528.2	1253.61	10562.2
248.184	69407.5	244.136	36628.5	488.532	89281.9
-3.55471	19717.2	339.78	43322.9	734.431	36367.3
21.2984	64520.7	90.1756	21059.8	1534.63	34364.3
273.653	39621.1	112.985	69588.1	1144.01	15924.9
277.137	26997.3	672.188	31575.5	47.2815	203839
80.4059	41824.4	76.9016	29801.4	1717.6	86951.4
81.0296	68502.6	-11.4019	39165.7	269.758	76702.2
58.3469	35986.9	227.363	28003.5	772.043	51144.1
202.605	114304	111.864	320976	1745.09	46673.1
24.449	111083	1357.43	62478.2	140.183	25482.8
133.272	48336.8	-76.1244	30610.7	328.21	39566.4
43.8977	109798	178.236	17302.9	29.8245	22960.6
425.76	34825.7	274.063	27990	618.771	41618.2
223.783	174570	119.358	32927	1188.75	83599.2
31.8212	13744.1	183.782	41576.1	597.919	37328.6
30.7114	74512.1	941.059	16438.3	650.192	62702.7
219.029	32678.7	129.988	34009.2	134.18	177035
53.1008	108158	43.0725	64946.7	722.116	172368
150.152	55052.1	165.808	26467.6	3417.95	59463
650.769	115600	215.651	31852.6	795.249	189096
68.157	22728.9	150.431	52605.1	255.795	21973.2
1999.42	72323.2	136.274	31024.2	1136.1	44662.5
157.95	49351.8	214.479	20976.9	880.562	126488
-4.82904	27204.1	289.962	17808.4	385.507	48141
52.5703	39891.5	665.867	26314	465.278	81811
60.7135	25221.3	-91.2823	16327.9	888.677	139020
330.648	142083	306.635	56281.7	2843.16	34831.9
281.233	49631.9	202.398	39975.9	1091.03	55220.6
78.9248	70948.6	323.603	34331.6	388.123	73970.5
77.2904	75661	63.9293	22340.9	971.375	19321.7
327.533	44284.7	182.604	71649.5	466.271	32661.6
956.485	72095.4	146.599	35707.1	707.3	99076.6
517.404	38605.5	142.555	38302.9	681.943	67391.4
210.684	85526.2	62.3966	83515.1	750.932	65435.3
144.647	36211.7	198.872	44308.4	83.3525	62158.4
10.8327	72961.7	161.567	67407.3	347.346	41953.2
138.508	44131.2	276.454	18183.7	214.755	55962.9
138.508	106133	180.94	2059.99	1555.96	32772.1
133.272	44750.1	143.67	65342.8	784.92	155140
175.599	64296.9	191.747	13270.7	816.443	35384.1
338.428	64272.7	238.367	29213	2247.25	80752
416.69	26132.8	902.024	22619	236.923	45900.9
7.94897	13774.2	271.945	61618.1	1085.93	90382.4
53.48	87770.1	273.927	43143.6	184.683	18764
103.38	76527.5	76.28	36651.5	716.106	42693.2
-3.62178	14958	5.57755	21005.9	432.42	60536
5.14713	35043.7	123.066	66776.1	245.852	37855.2
-3.42057	62756.8	178.86	28926.5	710.66	57834.8
170.949	31989.3	253.807	67112.7	4151.57	164151
39.2564	27055.2	138.369	24178.8	33.971	96765.1
168.17	68865.6	54.2387	60202	1032.07	21203.3
55.3781	40647.8	676.717	22683	720.914	10871
30.4157	75789.9	20.2021	40076.5	731.15	58492.4
637.812	16494.4	23.4953	26863.9	261.89	21702.7
160.246	121949	-29.6449	37168.8	1250.92	22459.3
4.28697	44143.4	51.9643	68602.7	521.274	37902.7
298.815	62745.2	224.196	405356	269.963	35610.4
142.834	25467	-17.3711	38548.3	-20.3222	101505
144.089	32873.6	139.136	51987.3	322.179	34988.3
1270.44	19945.6	97.9046	87682.2	702.543	20170.8
142.764	27786.1	126.563	31943.2	1146.7	42410.5
496.307	99235.2	123.346	15488.2	1103.97	26165.3
50.5267	62723.6	412.483	44968.4	655.763	105780
6.51092	23844.5	131.525	49061.9	1438.38	19734
182.327	39650.2	51.0561	55172.9	1066.08	68649.4
125.444	32820.8	87.7848	31234.1	2152.54	82491.9
107.238	21231.5	153.565	31904.9	1302.23	24189.9
1685.8	201761	349.507	71917.3	455.937	38783.5
135.786	18546.1	321.298	45086	4963.78	64384.5
154.192	36783.4	250.037	11161	373.015	60898.8
114.877	95377	272.492	25142.9	454.677	19480.2
106.396	32583.9	64.9269	76167.9	261.753	147014
94.6033	43259.7	276.317	66281	114.106	44292.8
-28.5047	73149.6	121.947	29375.4	3026.8	108812
170.324	57832.5	1.49782	28102.7	386.245	94167.4
47.1308	56691.6	163.236	27670.4	763.659	23646.4
58.4231	27645.9	61.1722	35742.6	419.692	86686.9
-46.2783	29427	94.9546	23281	619.609	30025.3
0.64158	66243.6	41.0502	21020.7	1619.47	62897.8
107.658	33096.1	184.614	44423.3	-95.5077	26273.6
394.021	42987.2	-4.15834	38510	316.889	123785
149.247	38502	8.88507	25736.5	262.301	70332.2
281.233	26938.5	42.2481	25322.6	802.224	40333.6
21.3715	45173.9	120.268	25523	5814.57	59372.7
259.22	30325.4	214.548	23497.1	359.622	62353.9
53.025	14224.4	313.496	24664	2900.11	67641.5
280.55	12655.9	193.062	35055	1206.52	41630.2
88.1364	20235	634.665	29541.8	219.029	50556.4
134.319	50717.7	238.367	65045.1	159.411	76309.1
120.058	231595	3.49931	28991.4	935.559	56213.3
147.574	60519	64.7733	39705.6	1039.12	35612
292.483	20488.8	265.723	37201	954.205	53137.8
138.997	100075	472.885	22343.2	975.466	68800
178.513	28495.4	107.729	72268.3	625.984	40806.5
322.654	62899.2	82.2018	56661	602.38	45598.2
85.6745	53162.6	80.0439	32576.4	447.511	30526.3
-39.1689	27339.2	160.315	25433.6	182.05	23837.9
52.646	40338.2	70.4709	36594.7	234.449	36704.2
169.421	29727.8	225.78	26100.8	190.64	68689.4
114.737	18190.1	730.518	47914.6	964.265	64308.9
172.962	77071.8	1891.11	34787.6	224.954	23053
102.608	144531	1549.79	78299.1	150.013	179808
134.04	33947.9	214.686	25958.4	299.427	61674.2
55.8342	34069.9	174.212	24346.3	589.763	32043.1
100.783	46625.2	37.3172	24408.5	24066.7	40538.4
58.2707	129773	14.7419	34115.1	647.372	19286.4
308.334	35731.9	188.978	23441.1	1029.99	11993.6
-50.0342	30897.4	700.258	18577.2	654.291	83117.7
318.246	30176.7	62.8561	35847.2	175.044	66450.1
74.7275	39302.7	210.408	20446.2	515.37	18583.9
233.761	62159.7	218.478	24175	1524.43	31113.5
81.733	79970.2	133.621	185590	871.44	77006.8
493.014	63532.4	775.195	17045.3	917.115	90990
-5.56681	8542.17	1213.43	27544.4	1495.93	43601.5
304.868	78247.8	627.078	49781.5	1154.88	48948.3
62.32	47414.6	122.507	2530.69	352.206	24674
46.0769	22481.5	225.023	44523.9	1628.19	14420.1
31.9693	44700.2	195	26528.9	1065.07	17511.2
71.63	79322.8	1465.75	24959.4	250.448	42599.8
587.496	41201.8	5.57755	24413.2	309.082	26339.4
172.546	31501.9	187.177	26722.9	169.004	17745.6
106.256	41375.4	124.955	96935.1	609.033	67558.7
58.5757	65829.4	193.201	26720.6	567.632	40171.2
111.374	25563.6	389.933	32775	417.023	38999.5
98.1153	42133.7	62.7029	98013.5	611.421	54222.8
35.3079	25324.5	119.078	52161	660.37	34910.7
215.375	81795.1	100.432	25414.9	336.873	69771.8
185.307	63207.4	123.906	28458.9	569.843	28702.6
72.5582	24941.5	51.283	55652.3	850.582	73744.9
100.643	32601	72.7904	111201	1078.49	14512.1
351.801	81134.7	-43.5284	50508.3	907.189	82644.7
-65.0579	44382.1	1530.87	38943.6	1273.93	118342
127.472	27138	22.0301	59021.2	1864.75	159093
-4.62783	35454.7	48.7894	17081.2	591.577	28614.8
97.7642	14796.8	153.426	47596.5	1058.63	54186.5
268.8	27993.4	400.516	23145.8	601.863	24728.1
93.6899	29098.7	46.0017	30021.4	969.698	61434.9
-21.8648	164414	-10.2617	129684	807.322	19057.7
166.781	100675	135.437	24422.4	557.023	4103.48
71.1662	34704.4	248.802	30066.1	406.871	152904
73.5648	180994	53.2525	82645.2	258.056	40035.5
210.339	32172	140.811	18344.3	559.433	28338.3
20.8597	79829.8	43.3725	51167.9	177.889	55381.2
101.766	67937.8	189.67	20888.3	1107.73	74149.4
431.621	33552.7	32.1915	35230.7	728.435	24334.3
61.8607	82954	208.13	42326.3	839.247	92024.7
834.753	25948.1	110.603	28507.5	696.702	52732.5
67.3869	31253.4	103.66	44963.8	357.667	44369.9
258.946	39702.9	49.2423	62113.2	189.186	22078.7
115.997	41159.5	413.285	30165.6	38.9578	78245.4
181.842	42056.1	154.122	59257.3	424.093	80685
91.933	40618.2	238.641	17514.3	1450.19	83256.9
85.1117	30774.4	750.807	18972.2	692.698	35796.5
45.2497	29227.7	78.1462	401711	146.041	29710.9
437.078	25187	30.9333	51102.8	1039.45	32296.6
138.02	79333.2	-12.5421	20886.3	315.261	60936.3
60.9428	30473.7	209.304	52581.7	1564.74	34580.4
238.916	86020.8	713.257	38647	1620.61	53433.8
341.537	56028.4	-2.48159	20790.8	2407.61	95538.5
38.8085	35147.5	-0.20121	45187.6	242.488	72799.7
113.406	56524.9	293.3	24508.8	2445.77	66769
579.909	36145.9	-92.8249	27331.9	995.52	83337.6
25.1834	38101.3	259.494	24922.3	56.9755	14499.9
321.366	35028.7	40.751	22334.6	1830.47	54860.8
192.301	39712	100.011	36538.4	1162.05	42958.2
144.368	91677.6	129.709	248271	930.06	42457.6
52.646	17730.8	173.934	21415.7	737.71	83349.2
902.561	25869.5	110.673	19708.8	1429.8	31304.1
46.1522	55711.1	297.317	25579.7	2294.46	59215.7
100.853	36603.4	36.2748	78412	2796.95	61998.3
20.2751	29898.1	65.3108	19114.6	230.253	91578.2
148.55	45327.6	234.036	34247.5	180.594	19249.2
212.823	48713.4	115.927	37422.6	365.481	115501
418.758	46670.6	-29.9132	29456.7	2009.82	80601.8
82.0152	34905.8	47.2062	24277.3	2633.57	21788.9
44.7988	39709.3	94.6033	20491	86.5891	131454
295.275	35708.6	191.332	24766.3	505.847	36720
404.263	39629.7	379.063	22595.1	1271.71	26551.7
190.432	73262.5	114.877	44319	901.287	17219.3
82.4375	110793	118.308	102314	72.326	66773.6
152.381	30417.2	209.097	75363.5	1232.75	86329
614.517	43249.1	246.675	24600.3	2035.64	50869.2
229.978	115239	183.436	29216.9	254.287	27865.6
158.437	47197.3	83.7747	51913.8	629.265	69166.8
87.5738	44770.8	476.454	48205.6	1135.83	19379.4
111.163	37271.3	275.225	34232	541.496	23728
157.811	62206.5	53.6317	36806.8	269.552	53151.6
90.035	86503	111.934	13276.3	270.92	32931.5
100.222	55258.1	509.527	39248	297.522	69069
183.505	165948	192.924	11154.8	1140.39	16023.3
266.543	33678.1	173.24	27301	1458.97	24914.2
90.5271	28542.3	113.195	51117.1	338.158	2750.61
38.4355	34438.6	120.758	33966.1	497.953	80893.4
87.4331	50653.5	26.9485	21639.5	2238.53	16590.6
80.5368	31404.2	23.7153	30460.9	283.962	158261
104.643	24004.7	95.4464	30230	57.2039	19501.7
167.823	45183.9	661.905	23935.3	763.19	119147
115.787	97658.4	41.5741	12012.1	773.585	23114.2
673.082	30856.1	561.321	21937.4	504.466	25276
5.5058	42098.9	-40.6444	20050.1	-33.9374	29564
84.9006	62340.9	448.706	47532	640.059	95088.6
-52.5158	49712	9.38957	22001.9	175.599	19739
20.056	42677.9	253.945	63364.6	201.914	80876.1
43.9728	18576.2	70.6254	34406.4	581.856	50670.6
166.364	100284	1.85486	64386.3	178.444	34652.9
0.855555	118759	194.031	25859.3	527.367	76953
135.646	57382.2	609.936	41729.7	207.785	30166.9
-9.18859	42447.3	44.874	12058.6	899.543	20018.4
15.6132	50934.1	31.3771	75562.6	576.08	21229.1
441.266	68289.8	201.292	21115.5	961.381	66503.5
113.616	72619.5	139.346	32217.2	1740.47	132787
83.2965	197566	200.739	20884.1	565.746	24086.3
48.5631	29276.4	949.309	198821	981.569	69261.9
102.608	41892.9	65.234	49778	616	40145.2
34.1937	82622.9	76.3577	57763.8	192.993	73319.2
59.7203	34471.3	4.86031	9400.87	387.519	68643.2
138.578	80475	123.206	46698.7	406.871	65214.8
827.443	108110	79.9735	21613	9820.72	54094.3
-53.4548	37547.7	119.358	35019	339.104	17836.5
45.9265	31324.9	30.3418	23096.1	27.9798	83797.1
38.4355	66511.9	-3.89006	36054.1	710.469	79294.2
95.4464	82134.8	81.1083	30359.5	95.7274	20904
319.467	24538.8	250.242	406.536	445.851	104095
1309.14	64436	54.0869	11779.1	764.531	686758
176.779	11293.5	130.967	319296	1113.97	28177.8
66.5406	102101	118.238	28955.6	737.773	37013.8
124.256	33416.6	-39.9066	21671.5	630.487	26225.1
1062.59	45264.1	564.25	24691.9	868.691	58364.6
179.9	49386.6	-17.5723	56391.2	829.656	27863
231.904	20207.9	130.757	82358	504.137	49676.6
32.4138	31795.9	69.7762	290176	812.218	62472.4
4.932	28415.3	242.9	55889	170.324	94501.3
1095.45	36370.9	35.7541	45522.9	217.03	66582.9
106.677	69149.9	261.959	58794.2	486.95	15869
80.748	66600.5	311.595	240.29	1663.54	30071.7
35.4566	32750.2	216.548	23098.7	1255.42	18555.7
214.824	27455.6	3.71405	40976.3	576.08	76150.7
51.6614	48233.9	139.834	43344.4	1496.87	83638
45.1745	41695.1	593.39	8137.74	-18.9137	102672
372.948	59206.7	137.601	42775.6	271.398	107139
165.043	85055.9	114.877	32024.2	70.8571	31764.8
329.226	69358.1	375.972	40172.2	2085.21	21144.3
693.524	35770.8	198.043	23161.5	1269.43	37493.4
156.28	54018.7	185.445	55630.9	4759.82	50109.7
130.617	55642.8	103.801	59561.5	371.536	106966
95.3059	143538	-10.8653	22981.7	704.383	180828
120.758	23644.3	34.1937	22145.3	1674.54	44951.6
147.087	62164.3	-38.2299	91822.9	142.834	65692
39.7792	118843	57.6609	32189.1	1701.1	179931
44.1229	38383.7	71.5526	59896.8	303.916	31764.9
146.459	62209	716.929	21300.7	518.06	75721.7
5.07541	19437.9	48.8649	10137.8	340.389	26884.6
8.66895	163971	164.07	17869.6	1306.39	23298.8
178.721	51676.4	73.1001	49741.9	-9.72515	42902.6
-3.68885	50332.8	91.3707	48037.8	469.579	49062.9
15.7584	76488.5	38.3609	29916.3	144.926	71863.8
125.584	105454	221.785	29184.6	272.833	68515.6
52.646	27865.2	168.518	9281.15	145.623	38857
179.484	35140.8	1992.85	42755.1	2110.16	37492.3
538.882	51015.8	332.814	24255.2	236.786	77159.1
155.584	26603	257.576	30613.2	545.479	25211.5
296.5	16711.8	509.461	52120.8	957.693	85369.3
738.908	30911.2	49.5444	30310.9	709.709	72893.2
82.0152	24090.9	307.859	22761.8	401.721	45226
373.15	17857.3	125.584	8680.87	330.241	64007.2
59.9494	33306.6	85.7449	19594.1	1219.33	31021.9
-10.7312	41801.6	63.9293	23082.8	306.16	21519.6
157.254	38926.9	123.906	9578.6	71.3207	37990.8
50.7535	85372.4	46.8296	61240.7	496.702	72403.1
1.85486	49481.3	158.228	43018.9	830.595	20869.2
62.7029	25366.9	58.3469	56796.9	1119.87	70116
81.3816	65773.7	159.411	22499.5	757.354	38482.2
1267.35	68515.8	335.249	65608.8	850.582	95118.9
310.168	68143.6	54.6943	67931.6	590.67	38669.4
115.367	73379.4	226.95	22374.5	655.059	144334
95.0951	50165.6	681.37	36435.4	993.776	39560.9
82.0152	22335.3	228.602	24269.8	409.744	59724.2
171.712	90755.6	14.7419	38468.9	830.93	61991.8
96.0083	32199.5	160.524	437.942	350.586	19298.7
133.202	55632.3	205.645	66977.3	1037.84	13665.9
1711.09	38144.7	144.926	46605.5	574.586	28274.6
276.796	47349.3	214.617	145429	73.5648	37864.3
282.802	85689.5	110.042	33405.4	120.828	33177.9
42.1731	47232.1	523.633	273220	785.255	59285.7
79.2365	33616.4	-32.7302	50142.8	68.6964	52521.3
334.37	81417.5	89.4725	72031.4	118.798	37273
5.93641	29624.8	194.584	34044	118.168	27066.4
114.596	49635.2	229.841	31759.4	1061.85	65952
-10.9995	28673.7	197.904	24486.6	248.459	19739.4
-24.0111	52367.8	42.9226	37040	547.699	31544
80.1143	109927	315.261	31733.2	1019.53	26291.8
37.1682	39354.4	306.567	44398.3	1466.42	54769.8
148.62	22670.8	287.372	4956.88	1065.74	26621.8
97.9749	30606.2	154.47	20742.1	895.25	37241.5
158.298	50307.1	80.718	43422.6	1263.93	58371.6
383.829	64476.2	1851.47	76379.7	172.823	22709.4
81.1704	29167.1	1028.18	42015.9	248.733	24371.8
223.094	15447.2	183.852	58683.2	1114.44	79438
120.338	22949.6	13.6542	50064.9	60.1022	25850.5
-34.2057	55225.4	125.375	44191.8	231.767	78723
31.2292	40101.2	207.785	32729.4	777.811	91892.4
168.865	49954.5	502.756	104.432	1645.63	76165.5
42.3979	22915.5	29.8245	100915	1083.18	60667.1
698.099	46511.2	130.547	43318.3	426.693	30304
-24.5476	37448.7	-49.2294	25807	131.875	60711.5
90.8786	11542.9	568.803	23018.9	2115.25	31634.3
142.485	55882.5	245.577	45727.3	800.682	32188.9
228.533	66741.3	82.156	25675.8	95.9381	42020.4
157.811	16445.2	331.595	67308.2	106.326	20191.7
167.893	74735	176.224	14042.8	113.546	34888.9
270.92	37958.5	449.768	28494.1	1532.42	24523.7
225.642	45047.4	250.859	156250	1978.97	50392
242.35	47280.3	64.6198	49221.2	291.052	49685.5
1619.07	33779	42.0982	69097.9	322.79	18042.8
119.358	32957	48.714	66826.9	456.003	42891.2
132.992	39723.9	836.162	25115.9	471.1	56124.7
86.4484	61507.6	37.3917	23416.1	1309.41	25980.9
71.0889	34110.2	21.3715	27400.7	865.471	42004.9
149.804	66116	273.927	18195.6	138.648	82938.5
430.423	66936.7	107.378	26901	746.969	102835
144.159	266085	353.824	211071	740.294	20162.7
1214.03	63062.3	55.6061	24536.1	677.164	54892.2
85.7449	37884.5	210.96	46886.9	70.9344	151886
384.635	40601.1	12.1337	21999.5	379.063	41345.6
140.322	78878.1	346.131	47185.5	929.657	83079.3
-43.9308	65209.7	109.411	25000.9	452.422	64412.8
49.9976	111450	772.982	31856.2	1178.49	27833.8
278.639	60013.3	2524.05	45192.6	797.798	21895.4
18.6696	19717.1	231.217	29971.5	711.863	70403.5
689.137	46606.5	118.588	27248.2	650.833	121237
42.7726	36207.5	6.29543	74005.8	95.3761	40635.1
346.739	187593	-0.93898	83695	98.3962	15130.7
122.717	66622	113.686	14384.8	857.825	26669.7
85.5338	36766.2	118.588	81844.9	492.882	73562
82.1237	44637.5	155.375	72408.6	1334.16	216409
78.6912	46159.9	969.43	26283.1	187.801	22076.8
127.752	43847.1	168.518	52586.3	1037.3	37717.1
68.6964	19611.8	56.5949	35081.7	81.1	49831.3
274.815	61559.8	54.3147	56107.2	120.268	98474.7
79.1585	57483.1	1181.84	13171.1	1013.76	56931.6
213.789	40550.8	113.406	51367.5	555.72	52335.6
260.316	63195.6	53.1008	28336.7	684.745	24805.6
42.5478	92125	575.171	34000.1	168.726	62099.1
153.635	64067.6	232.111	14097.2	570.168	27817.7
49.5444	40910.4	45.8512	21850	2429.48	93942.1
199.84	67221.1	469.315	21157.4	466.403	39644.2
-37.6933	38240.2	-24.3464	24493.6	635.114	56285.7
71.5526	63050.1	142.624	24765.6	808.864	85922.4
92.1439	32772.9	93.4791	33598.7	895.183	87853.7
48.5631	12876.4	98.0451	29811.8	426.759	28244.3
286.485	31385.6	109.131	67991.7	373.889	61022.9
53.9352	48791.3	89.5428	30914.5	612.388	34427.7
117.538	72384.4	-6.97528	24712.4	1802.3	25550.4
489.785	65646.2	871.373	32961.9	966.747	90322
286.554	50108.8	93.8305	24766.6	1070.84	231644
967.954	98549.6	615.355	65464.6	-23.4074	18851.6
317.636	45877.5	140.322	29240.5	954.943	25116.5
392.48	76084.2	151.337	17454.1	1649.18	22954.9
394.758	57467.8	117.608	22610.2	168.657	23491.9
51.2074	32357.4	458.986	16878.5	101.204	55665.3
125.235	20958.9	83.2821	36462.7	1007.66	25651.3
42.3979	202809	100.643	30867.1	385.708	32027.3
138.648	19843	32.4138	72386.3	34.1194	25375.9
75.7363	32799.5	121.877	20943.7	259.152	96091.5
18.3052	40607.7	767.348	29379.9	377.719	43574.5
15.5405	73832.8	-7.17649	14803.7	237.404	13258.7
125.654	53483.9	-1.94503	112711	485.037	75733.5
223.094	25418.4	31.2292	20595.7	767.08	28606.7
166.642	94258.6	93.1278	76301.9	1734.36	20746.2
583.801	181776	264.833	59782.5	2518.14	64249.2
291.256	37926.6	69.9305	64502.2	691.108	60797.9
655.187	62984.4	140.741	85261.3	-52.7841	96241.5
-55.3998	46691.2	77.8349	117901	148.898	19819.7
254.082	20469.5	446.515	20805.4	556.045	28729.6
54.8462	53834.1	190.709	34819	664.461	27538.6
68.6964	31071.3	13.147	31174.2	1154.01	67926.4
81.1863	23258.8	21.8105	22913	705.271	29897.2
35.9772	59874.1	539.862	43299.5	136.624	24710
37.4662	44908.9	73.0226	58192.6	151.476	24056.8
25.8449	41919.3	331.934	32657.6	-146.749	200507
22.0301	48953.9	15.25	37409.2	1085.86	408.341
227.432	52473	60.3314	31573.8	-36.6202	145100
122.996	41562.6	43.4475	22774.1	809.334	22467.9
405.734	22613.5	83.1401	71463.6	560.67	58989.6
96.0083	131161	181.564	31638.7	103.31	48993.9
-10.1276	41266.3	1080.9	219307	795.853	24931.7
378.055	25752.2	450.365	32683.5	744.703	77373.1
181.772	20207.3	827.174	27344.5	66.4637	65767.6
230.873	21252.9	2.35499	24353.2	544.174	284004
189.878	74206.1	-61.1678	17399.5	779.42	37755.9
153.565	45884.1	14.1616	322910	300.72	43337.3
-23.5416	15309	541.561	24293.9	1517.39	41617.8
21.7373	114540	182.535	18007.2	1059.24	42449.8
96.0786	31542.8	66.3868	26975.1	974.326	42542.9
166.572	39756	32.1915	17283.1	95.8679	58838.4
278.161	63730.3	52.8734	39546.4	-165.864	66324.3
765.202	48624.9	-28.0353	56492	559.172	33006.8
139.206	54221.6	173.379	55731.5	286.826	63946
832.473	94335.1	112.845	47819.5	340.186	25953.7
119.428	43594.2	852.594	31657.1	985.661	28583.7
100.362	82866.1	625.276	72248.6	142.834	14048.7
111.304	38297.5	176.71	83881.6	32.636	38020.6
130.617	46390.7	452.157	65818	131.386	84694
307.859	53545.2	177.126	32216.2	1002.5	24772.2
190.64	63284.8	51.5857	73059	146.25	68074.8
267.569	32843.9	218.891	29773.5	1504.85	91452.5
48.6385	72432.3	250.791	28116.6	362.99	56776.7
68.7735	37663.8	6.65461	21065.6	642.819	30225.7
8.95712	59991.5	61.9372	39125.2	962.186	50958.8
48.2614	61699.7	305.072	33902.7	246.95	55648.4
270.441	34375	230.873	55751.5	2088.96	21943.4
62.2434	25413	42.2481	26445.9	1594.86	27602.6
-21.06	78146.7	152.172	31647.6	1494.39	25197.6
85.1821	77489.2	303.712	19248.4	1284.86	46745.3
-25.2854	22012.9	126.353	27279.2	233.005	31946.2
186.069	59757.6	117.468	25245.5	727.172	18021.8
47.3568	21789.8	242.35	54927.3	29.3076	52693.8
236.648	80460.9	66.0024	56444.4	1159.3	53338.6
279.117	83315.3	289.826	32598.6	284.508	74507.7
56.7471	10211.4	207.854	35635.3	718.004	52415.8
173.726	33186.2	-35.1447	31977.8	924.359	69280.2
126.144	25922.5	40.0034	27729.5	443.061	86491
138.159	38847.6	480.549	41360.6	637.812	18259.2
27.3903	56204.9	277.069	34108.4	871.843	31043.2
80.4664	36292	19.691	18860.7	1163.19	51791.4
214.548	29713.8	415.421	16684.4	771.104	75649.1
47.5829	20380.6	57.9657	33695.1	342.956	23532.1
152.103	43914.3	146.25	1207.73	11873.3	104255
620.64	44014.7	1.85486	74523.9	527.105	28991.7
262.575	79751.2	-31.0534	30184.2	612.453	186296
133.9	58559	177.889	15182.9	711.61	58419.2
61.0193	24062.4	128.8	26905.2	252.574	67295.4
155.236	60133.5	52.2672	26902	675.187	80380.5
1520.28	72817.6	61.6311	29550.7	1408.87	22742.6
14.3792	64052.5	162.541	24980.9	-58.0155	32993.8
173.517	39755.4	93.8305	25378.7	1344.62	10162.9
596.69	108347	-12.2738	580229	1663.54	36518.1
71.5526	85979.1	213.789	36537.2	530.576	67444.3
186.9	66538	92.2844	55161.2	1502.23	82474.7
113.546	30309.1	113.616	21522.5	1067.55	137393
[truncated: 8,002 more rows]

## Sheet: 5B
WT Unind	censored	SSD1 Unind	censored	CR Unind	censored	WT Ind	censored	OE-SSD1 Ind	censored	CR Ind	censored
21	22	26	25	27	29	8	17	18	10	16	13
22	23	26	25	35	24	14	11	11	9	20	21
21	18	33	25	18	26	22	11	10	12	16	14
19	21	31	26	33	22	15	19	20	14	10	12
23	23	27	22	26	29	11	8	14	8	8	21
25	14	29	24	28	20	15	18	14	14	25	17
14	21	30	26	21	18	23	19	5	19	13	16
25	14	24	23	18	28	25	13	14	16	18	12
23		26		25	24	19	10	17	10	17	12
17		32		27	27	18	9	9	10	14	15
24		31		25	18	6	23	13	12	27
29		24		25	18	9	13	10	8	22
25		30		20	17	17	13	16	16	23
24		23		19	24	12		15	9	21
28		25		28	20	21		16	15	23
23		24		19	20	13		16		12
17		25		26	22	8		23		14
25				21	23	12		15		11
18				27	19	13		14		13
12				22	28	13		15		3
11				26	18	16		12		12
24				25		25		7
16				21		12		19
12				23		12		8
26				23		18		10
27				20				11
27				27		20		10
				27		8		15
				25		18		16
				26				21
				29				19
				23				22
				25				7
				26				11
				22				8

## Sheet: 5C
WT	censored	WT 20 uM	censored	WT 50 uM	censored	OE-SSD1	censored	OE-SSD1 20 uM	censored	OE-SSD1 50 uM	censored	CR	censored	CR 20uM	censored	CR 50uM	censored
28	16	15	18	22	9	20	17	12	15	29	15	18		20		16	18
27	20	15	11	14	13	24	19	22	24	20	12	16	22	26		21	16
25	12	10	14	10		24	22	23	22	21	24	25	20	25	18	15	22
24	18	17		14		18		23	12	30	14	25	25	24	26	15	24
22	21	11		10		26		20	17	19	13	26		29	22	23	14
22	13	12		6		17		25	14	26	22	21		22	24	20	17
21	18	18		6		18		14	17	22	12	27		24		19	19
20	21	22		14		28		19	12	25	13	22		25		27
19	19	14		17		21		19	11	20	16	27		21		22
19	12	21		16		20		26	16	25	15	25		14		16	18
19	15	16		6		25		17	12	14	21	31		24		15	18
19	22	14		12		25		24	16	17	19	28		31	15	20	18
19	24	16		15		29		18	17	26	19	22	15	18	17	25	15
18	12	18		15		30		18	16	16	15	18	18	15	22	28	16
18	20	19		7		26		26	18	12	15	15	22	19		18
18	16	13		15		27		20	12	22	25	25	22	30		17
18		17		18		19		17	21	22	23	26		18		17
18		20		11		16		24	16	23	19	26		23	25	15
18		17		12		23		28	22	20	12	25	21	31		21
18		16		13		25		27	15	25	16	14	23	17		11
18		13		17		18		24	17	24	12	24	16	24		14
18		11		6	13	27		21	17	20	12	18	22	25		29	22
17		11		8		22		26	1	26	11	33		29		18	17
17		14	10	14		25		18	14	19	16			15		21	19
17		15	10	9		24	18	30	14	22	12			22		16	17
16		14	16	14		28	19	12	12	15	16			30		21	18
16		19	19	12		21	14		15	21	17	14		27	18	22	21
16		8		12		26	17		18	16	18	21		21	16	18	20
16		16		9		29	16		18	24	12	27		21	20	13
15	17	9		18		18	17		17	23	21	19	17	23		25
15	17	12		11		28	17		19	12	16	31	13	23		26
15	8	14		15		22			24	23	22	25	20	29
15	20	10		17		28			12	15	15	15		32
15	21	15		16		19			21	13	17	29		24
14	12	19	17	13		26			16	16	19	28		23
14	18	14	15	14		18			20	17	15	26		23
13	21	18	11	17		29			18	26	17	30		26
12	17	15	12	16		15	14		23	20	16	20	22	21	22
11		15	11	13		20	17		12	20	15	24	16	27	18
10		16	14	12		24	23		18	14	16	22	19	18	26
16		14		17		15	12		17	16	17	20	20	16	17
22		15		16		27			15	23	13	19	20	24
19	22	13	17	14		19			18	12	18	24	16	25
18	17	12		18		15	12		11	14	14			23
23		8		8		22	13		14	15	11			31
24		22		17		24	13		14	11	11
12		15		9		18	15		15	16	20				17
21		16		13		29			18	23	16
22		15		11		17			24	26	11
17		17		9		18			16	12	15
16		19		13		27	18		14	22	12
21		13	15	10		29	18		22	21	12
14		11		15		25	18		18	13
12		10		12		18	12		21	19
15		21				22	12			14
20		26				25	22
16		14				26	22
24		18				20	24
19		23				27	18
17		16
14		15
18		19
16		17
13		17
15		19
28		12
19		15
21		18	22
15		15	15
14		18
22		14
27		16
25		13
		12
		9
		17
		15
		15
		19
		13
		20

## Sheet: 5D 
RLS	dif Ctl		RLS	dif SSD1		RLS	dif CR		RLS	dif aft1
19	242.176		19	163.414		18	84.308		11	66.107
13	253.839		8	72.531		12	111.811		19	105.803
17	205.493		16	76.603		14	148.619		14	140.838
19	349.321		10	141.634		5	88.445		13	126.646
15	151.948		15	157.377		15	109.206		14	108.876
12	289.992		14	90.486		14	122.937		13	128.882
9	350.502		15	106.601		10	99.521		16	173.89
11	187.015		16	102.191		15	63.46		3	67.352
5	204.744		18	88.547		15	92.433		11	90.304
12	411.534		16	83.854		8	158.687		12	130.262
10	127.34		5	104.874		16	84.433		11	127.209
11	363.549		6	98.619		13	115.793		18	111.659
19	286.523		16	104.327		8	73.054		10	145.658
18	310.762		18	401.318		12	153.178		14	63.296
12	185.738		14	67.74		6	152.182		8	107.585
13	218.631		6	92.083		11	88.251		17	137.284
12	130.664		10	173.7		14	98.53		6	82.175
22	629.695		14	135.539		8	120.931		19	85.226
14	310.206		19	90.739		10	107.876		15	111.386
16	885.528		18	75.686		18	147.381		21	136.356
18	576.518		12	145.337		17	80.88		19	131.829
14	462.158		4	170.095		10	84.364		16	125.523
10	308.296		14	86.143		14	140.785		16	50.863
17	212.598		12	464.49		12	78.741		17	53.974
11	590.336		14	104.393		15	229.766		11	81.465
12	266.829		14	130.343		14	330.503		12	50.267
16	207.049		12	67.962		19	125.496		12	58.507
11	427.35		8	86.159		15	103.935		10	40.558
10	320.77		11	87.124		16	143.574		9	67.631
14	109.116		16	98.266		10	108.945		3	44.902
17	153.33		10	157.73		9	84.282		17	75.988
13	177.705		14	121.248		15	95.439		17	66.441
12	232.027		16	105.288		14	93.928		12	89.561
21	637.961		5	108.836		13	144.901		15	62.322
14	371.795		16	83.125		5	105.877		4	53.007
6	144.897		12	114.853		13	89.252		15	85.987
12	109.519		10	89.834		13	86.989		12	33.43
22	539.038		14	239.623		16	129.369		8	58.821
24	789.371		12	128.552		17	153.445		11	40.605
19	96.832		11	105.343		12	89.987		11	56.368
12	127.309		13	126.766		9	73.173		12	85.981
16	170.32		16	91.421		22	120.8		15	47.694
14	213.459		10	99.533		10	90.075		7	69.674
10	136.483		15	81.846		11	70.747		6	52.889
16	247.581		15	389.724		14	322.6		9	25.202
15	152.859		12	102.603		21	164.94		11	35.105
12	180.938		13	106.284		18	82.391		6	76.098
14	204.526		15	131.145		14	87.686		8	27.608
15	380.29		11	70.418		18	80.907		12	61.563
16	277.95		14	140.055		22	152.435		22	27.973

## Sheet: 5E
Control	OE-SSD1	CR	aft1d
236.74	133.027	38.754	162.869
390.469	68.706	35.667	151.894
347.427	57.376	24.098	181.084
632.41	52.916	32.641	121.557
341.972	217.294	36.202	143.956
289.406	95.453	7.705	181.34
375.774	68.115	40.698	113.759
636.114	166.718	30.294	137.064
603.464	43.556	18.859	198.112
326.61	63.471	50.89	94.966
330.561	92.271	43.562	161.134
385.701	64.027	33.383	105.206
196.535	77.048	48.832	99.689
758.2	45.012	39.494	144.929
625.244	48.411	19.884	112.288
209.614	47.337	41.024	138.454
224.671	72.455	31.944	118.829
178.024	43.762	38.36	119.036
266.757	37.358	48.608	164.926
325.348	30.054	43.485	202.828
146.077	67.788	31.743	141.934
346.636	76.541	33.246	153.371
382.54	51.807	35.123	151.729
648.356	16.536	65.066	202.805
357.227	81.998	53.319	122.683
244.257	64.806	19.618	166.077
774.946	82.746	42.613	66.107
702.078	110.12	63.961	105.803
438.726	77.036	33.709	140.838
529.97	237.9	84.308	126.646
458.271	202.782	111.811	108.876
448.881	239.679	148.619	128.882
269.835	167.652	88.445	173.89
431.613	153.556	109.206	67.352
500.322	283.169	122.937	90.304
525.599	185.345	99.521	130.262
282.981	109.128	63.46	127.209
407.523	152.824	92.433	111.659
232.29	178.348	158.687	145.658
383.981	238.456	84.433	63.296
462.291	144.851	115.793	107.585
527.732	158.34	73.054	137.284
283.656	197.625	153.178	82.175
493.886	222.404	152.182	85.226
428.193	236.14	88.251	111.386
391.609	260.241	98.53	136.356
337.411	185.046	120.931	131.829
316.638	107.734	107.876	125.523
246.454	348.065	147.381	50.863
519.785	105.332	80.88	53.974
698.083	186.587	84.364	81.465
540.284	162.903	140.785	50.267
242.176	185.695	78.741	58.507
253.839	151.956	229.766	40.558
205.493	190.222	330.503	67.631
349.321	163.414	125.496	44.902
151.948	72.531	103.935	75.988
289.992	76.603	143.574	66.441
350.502	141.634	108.945	89.561
187.015	157.377	84.282	62.322
204.744	90.486	95.439	53.007
411.534	106.601	93.928	85.987
127.34	102.191	144.901	33.43
363.549	88.547	105.877	58.821
286.523	83.854	89.252	40.605
310.762	104.874	86.989	56.368
185.738	98.619	129.369	85.981
218.631	104.327	153.445	47.694
130.664	401.318	89.987	69.674
629.695	67.74	73.173	52.889
310.206	92.083	120.8	25.202
885.528	173.7	90.075	35.105
576.518	135.539	70.747	76.098
462.158	90.739	322.6	27.608
308.296	75.686	164.94	61.563
212.598	145.337	82.391	27.973
590.336	170.095	87.686
266.829	86.143	80.907
207.049	464.49	152.435
427.35	104.393
320.77	130.343
109.116	67.962
153.33	86.159
177.705	87.124
232.027	98.266
637.961	157.73
371.795	121.248
144.897	105.288
109.519	108.836
539.038	83.125
789.371	114.853
96.832	89.834
127.309	239.623
170.32	128.552
213.459	105.343
136.483	126.766
247.581	91.421
152.859	99.533
180.938	81.846
204.526	389.724
380.29	102.603
277.95	106.284
	131.145
	70.418
	140.055

## Sheet: 5F
WT	censored	OE-SSD1	censored	CR	censored	aft1d	censored	OE-SSD1/aft1d	censored	CR/aft1d	censored
14	19	20	26	15		20	15	17	19	20	14
18	14	29	23	29	20	23	20	21	23	24	18
13	15	23	28	30		28	26	20	23	29	20
13	23	18	27	26	15	16	17	23	25	13
20	13	30	22	27		15	20	22	27	15	19
15	16	31	18	29		20		24	26	30	20
11	18	22	27	26		28		25	22	19	22
23	14	13	21	26		31		29	27	22	20
28	16	20	18	28		28		29	28	17	15
15	15	27	19	32		24		26	25	15	21
19	11	26	17	23	27	16	17	20	25	32	23
24		30	15	28	17	21	27	25	24	15	19
22		18	13	14	28	30	28	25	26	30	16
19		32	27	21	15	31	27	32	28	23	22
17		20	20	24		29	26	24	24	18	15
21		26	27	32	15	33	21	25	30	31	22
21		22	17	27	18	26		30	21	26	18
22			21	17		26		27	27	35
			28	22		20		27	17	23	21
			30	22		27		25	21	25
				35	18	25		29	30	26	21
				14		22		23	19	33	15
				23		30	22	22	22	29	16
				28		29	30	31		15	24
				32		24	23	26		21	19
				23		15	20	29		24	16
				23	15	23	14	30		26	16
				35	21	15	21	29	21	33	28
				28		17	25	31		31	20
				24		33	28	31		29	25
				34		34	29	19		25	22
						25	23	20		19	20
						20	23	30		17	24
						27	24	30		29	25
						26	20	23	27	18	17
						26	19	24	26	31	17
						28	21	24	30	19	30
						18	25	26	18	22	20
						25	19	18	20	25
						35	18	29	17
						15			18
						20			19
